# Supplementary material for: DePARylation is critical for S phase progression and cell survival
Source: eLife journal article supplement (doi:10.7554/elife.89303), 2023-09-28
Supplement: fig2-figsupp1-data4 [file elife-89303-fig2-figsupp1-data4-v1.zip]

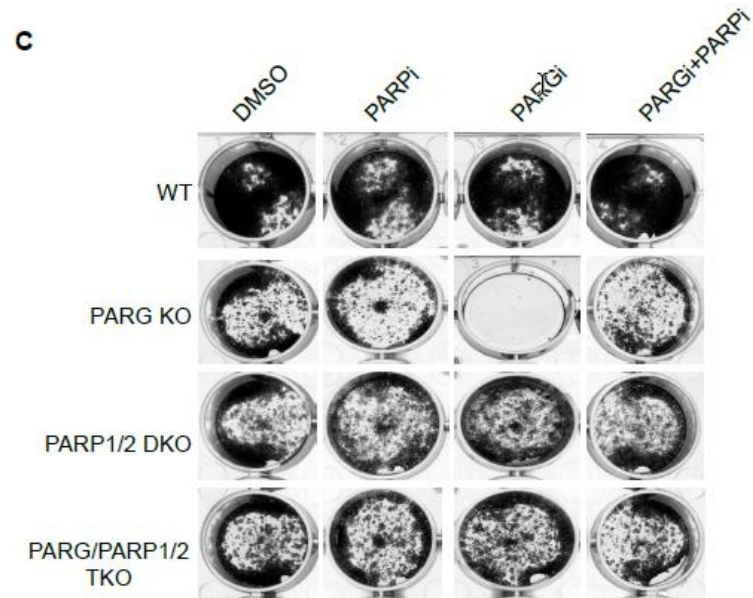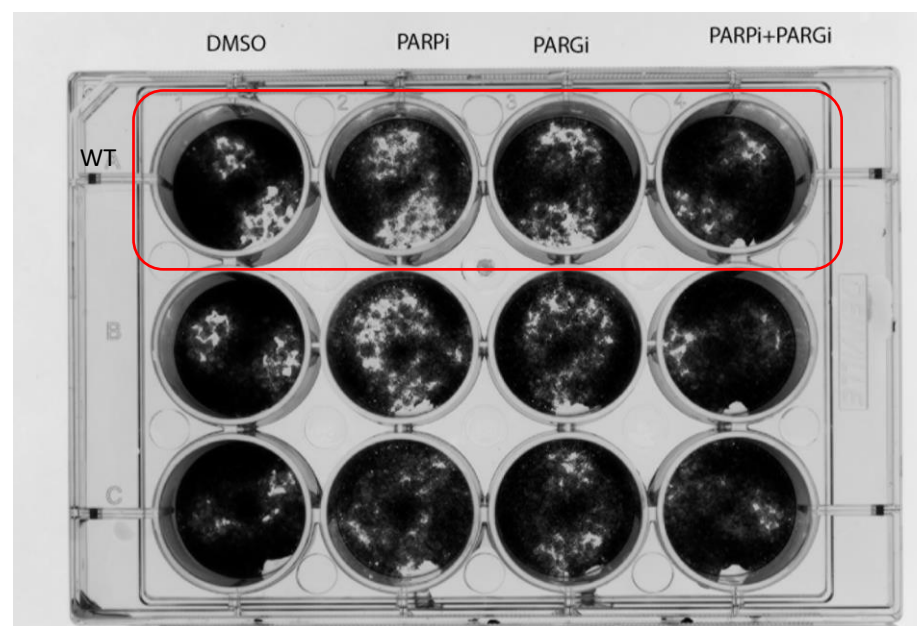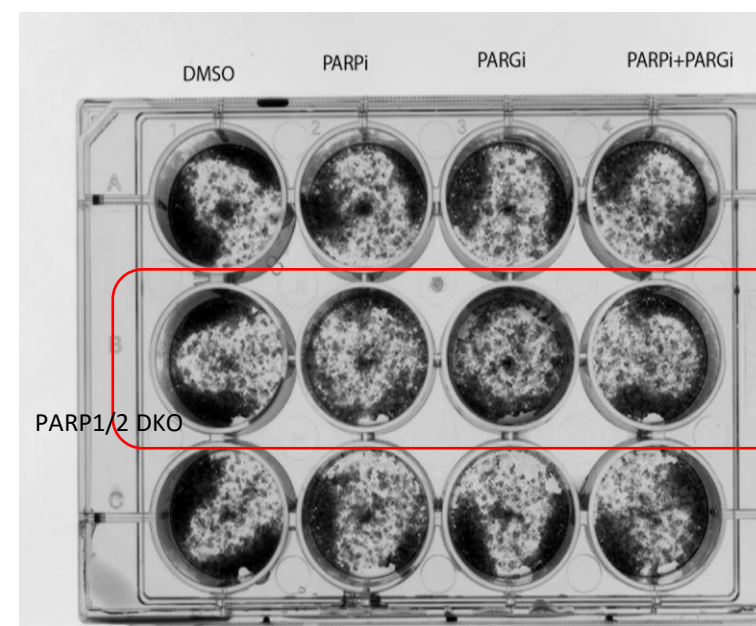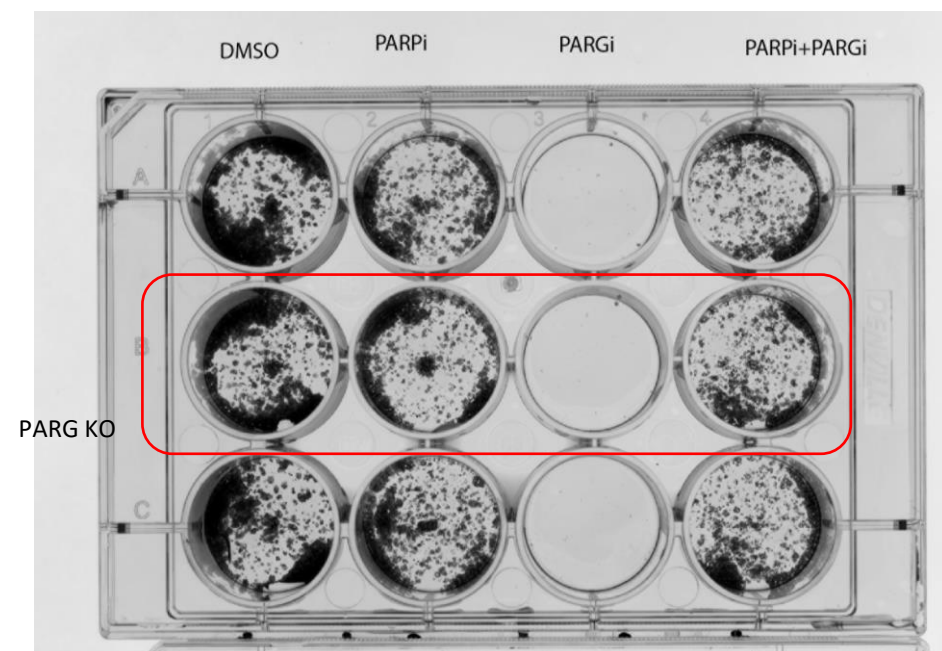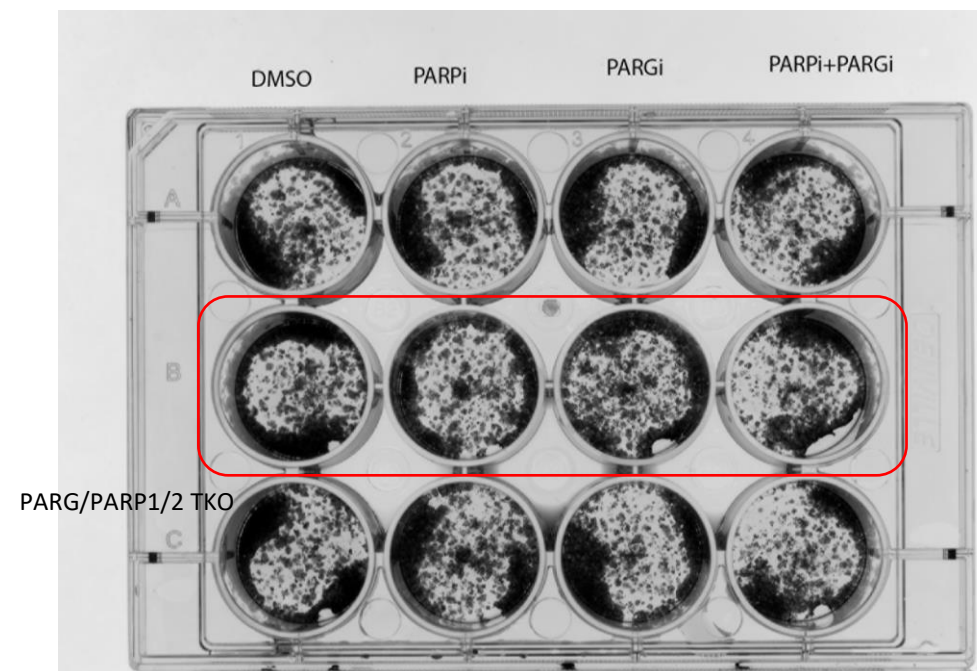

Figure 2-figure supplement 1

**E**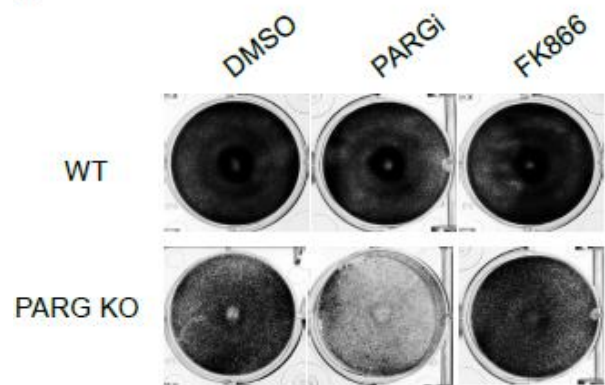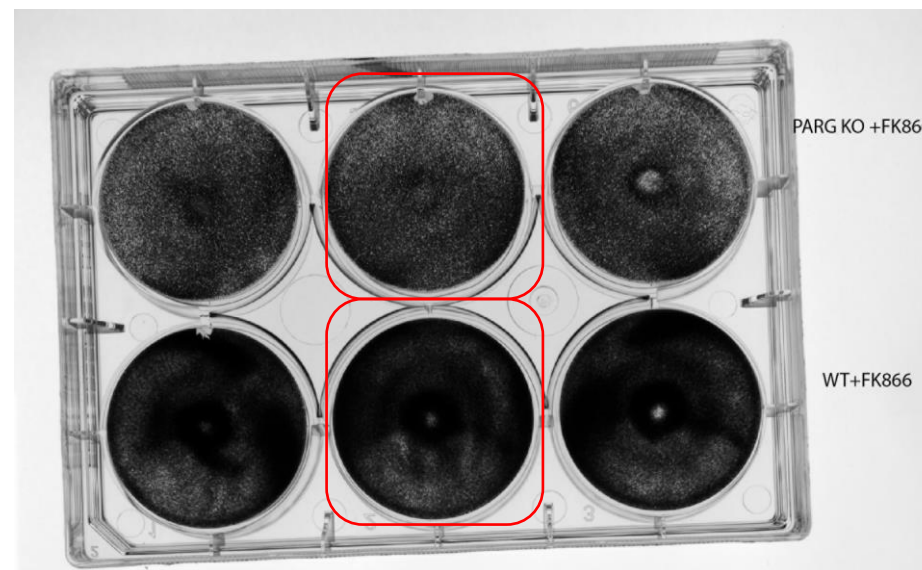

PARG KO + PARGi

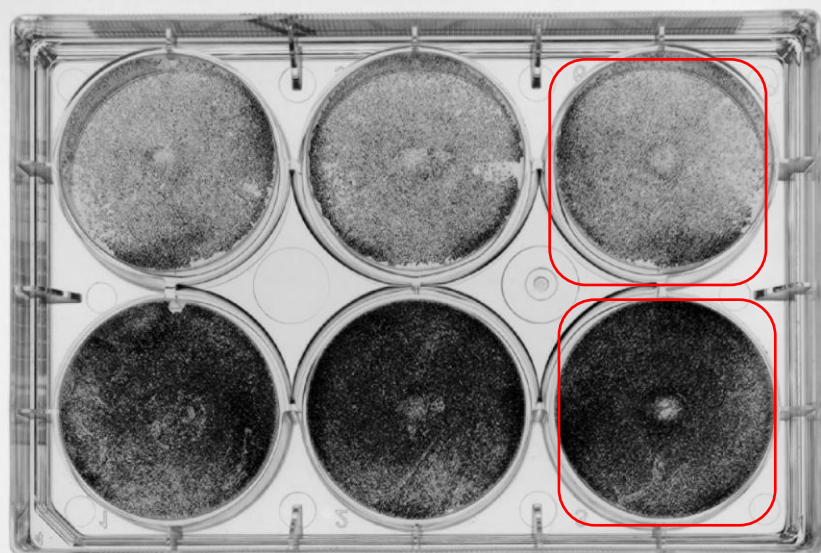

PARG KO + DMSO

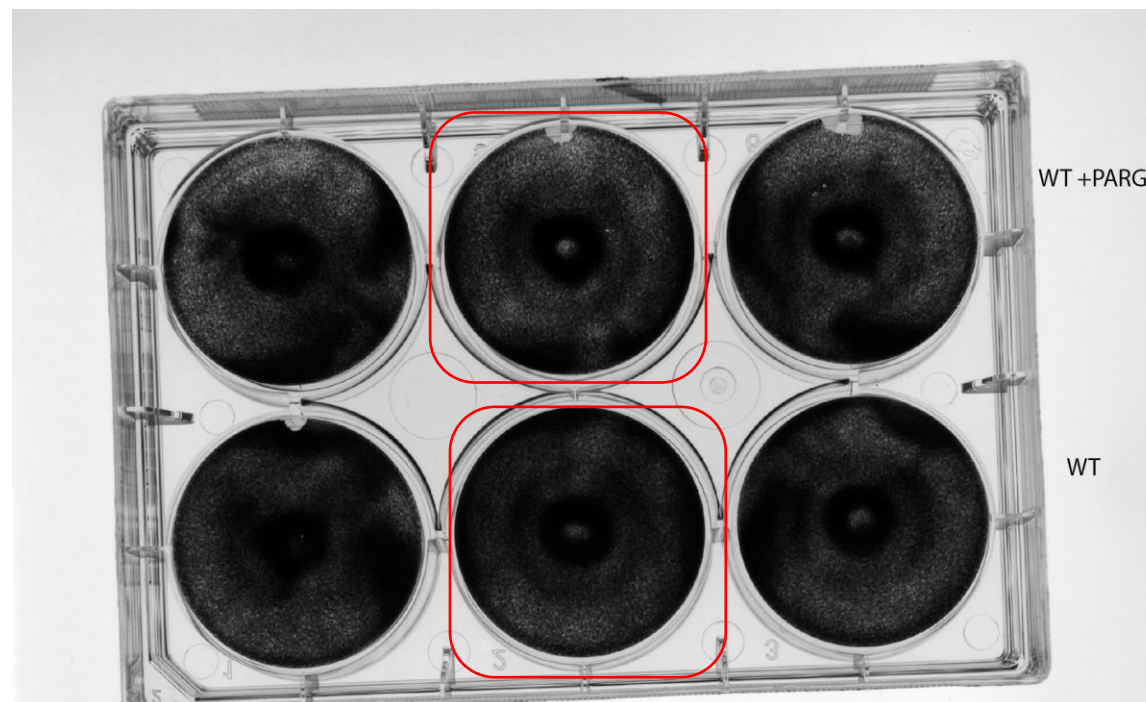

WT + PARGi

WT

Figure 2-figure supplement 1

**F**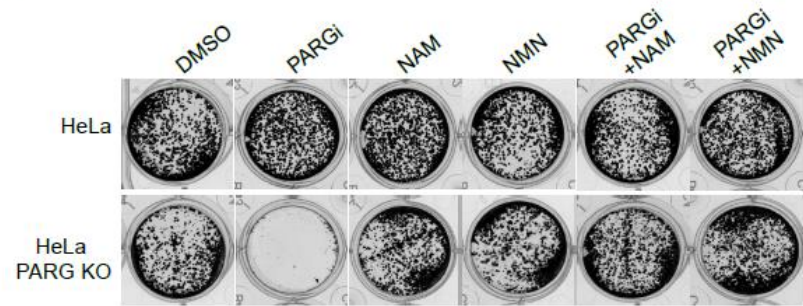

HeLa PARG KO

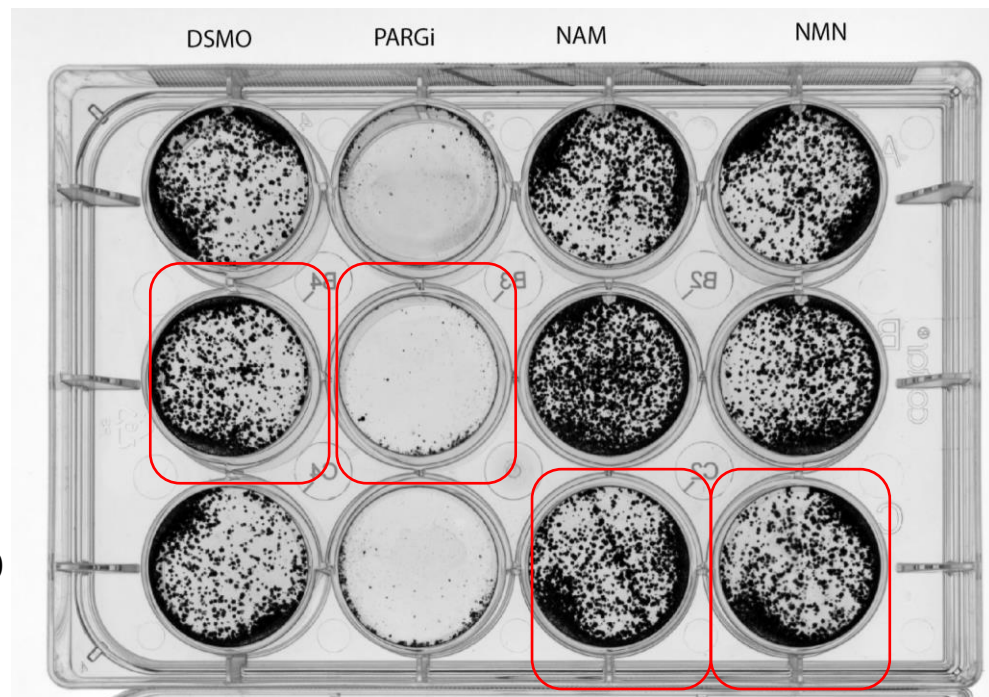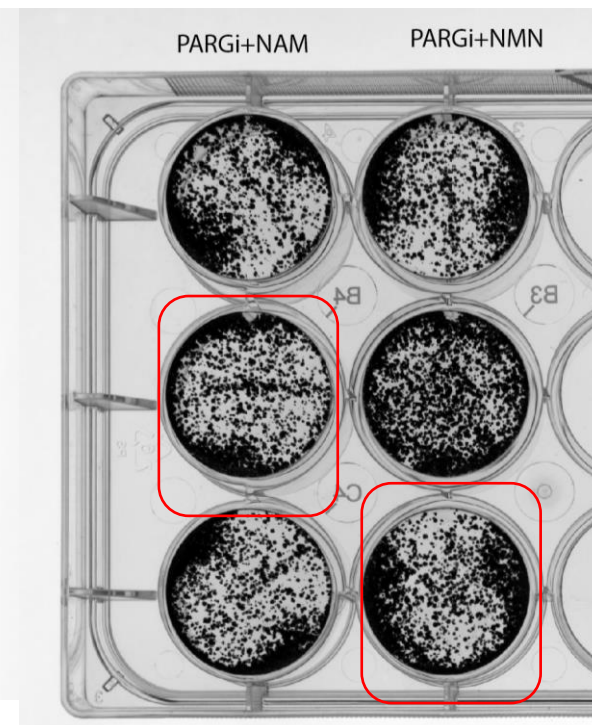

HeLa

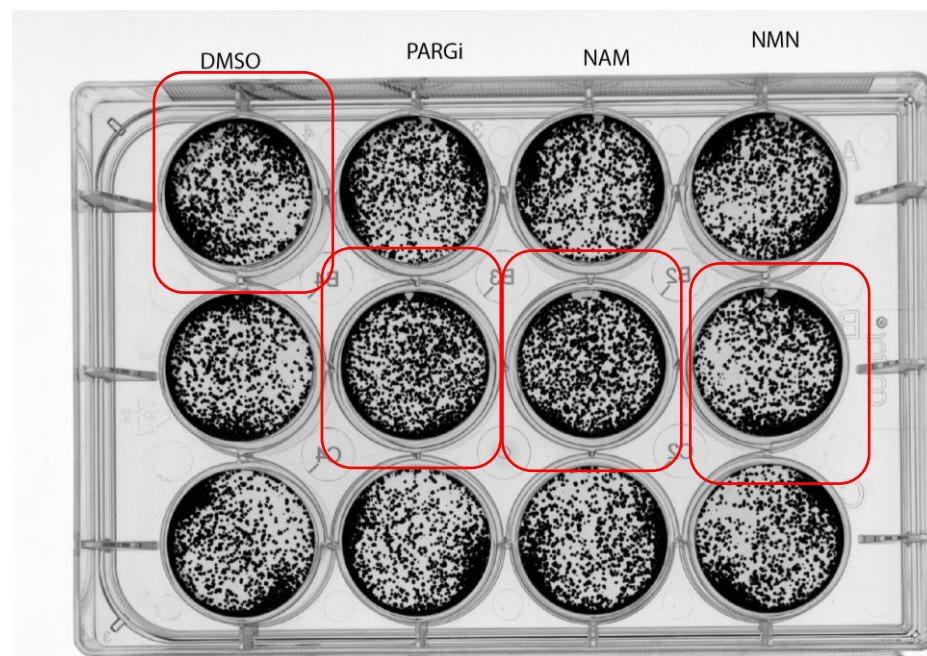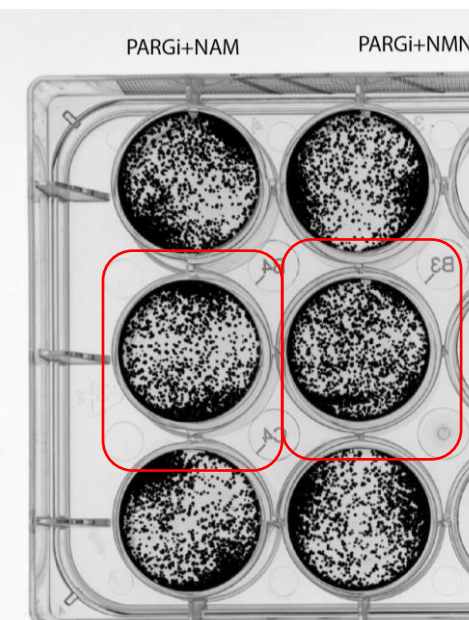

Figure 2-figure supplement 1
