# Supplementary material for: DePARylation is critical for S phase progression and cell survival
Source: eLife journal article supplement (doi:10.7554/elife.89303), 2023-09-28
Supplement: fig4-figsupp1-data2 [file elife-89303-fig4-figsupp1-data2-v1.zip]

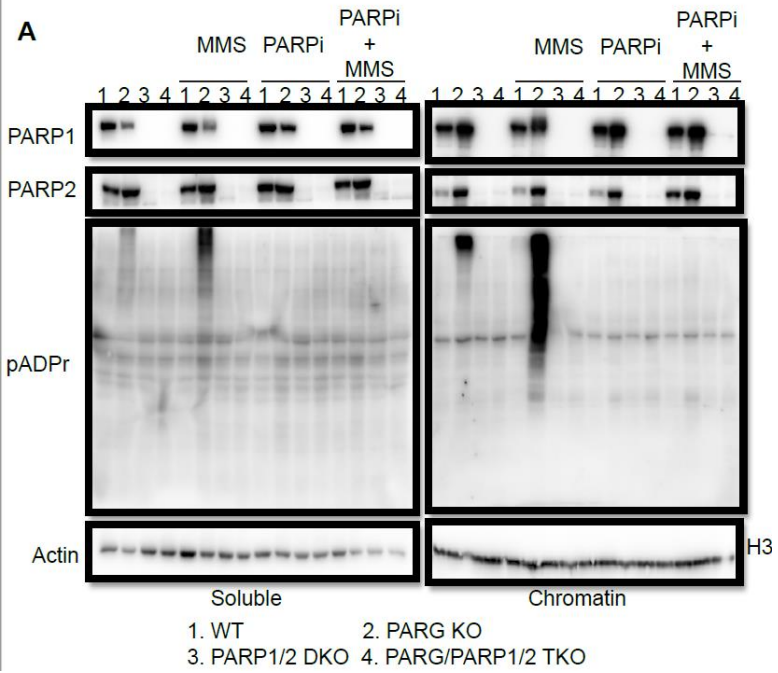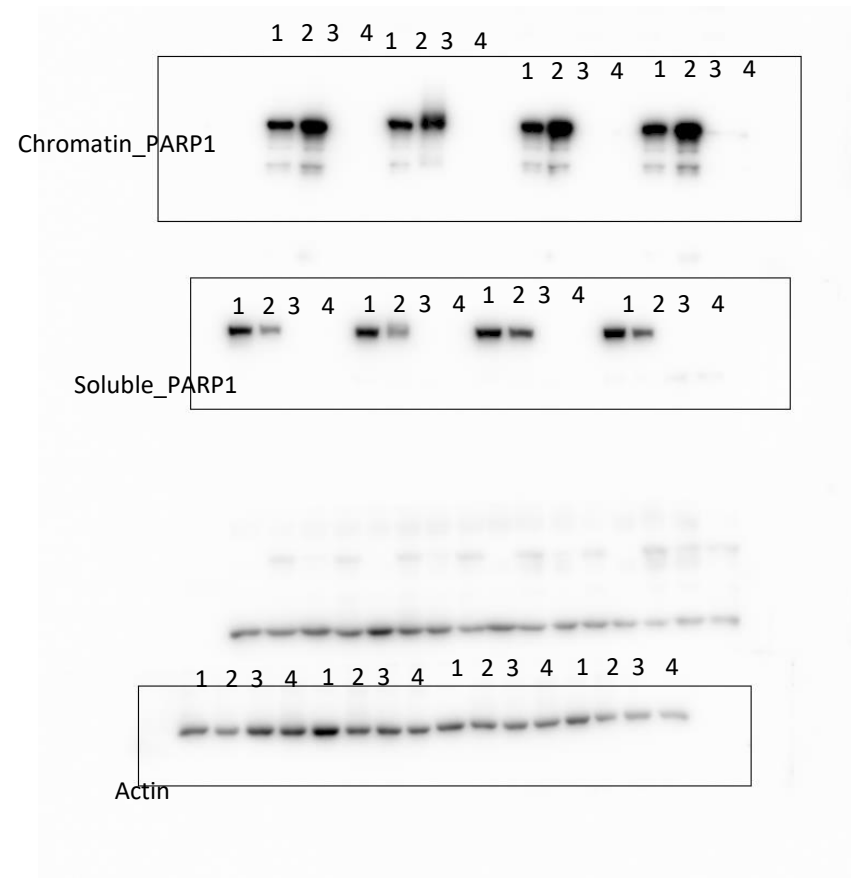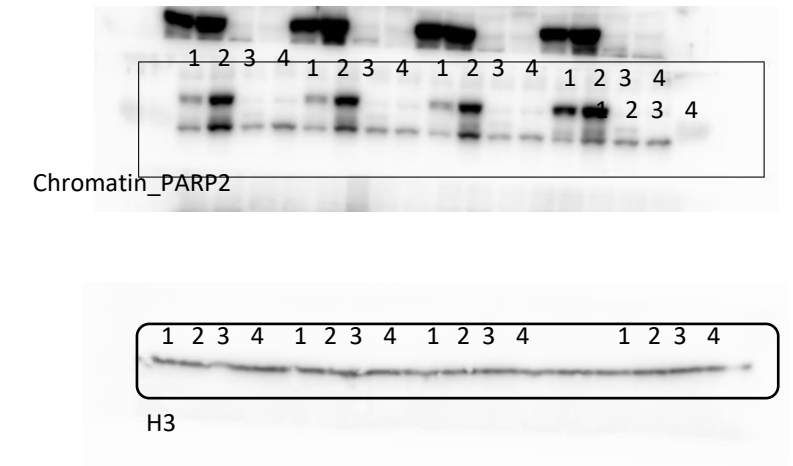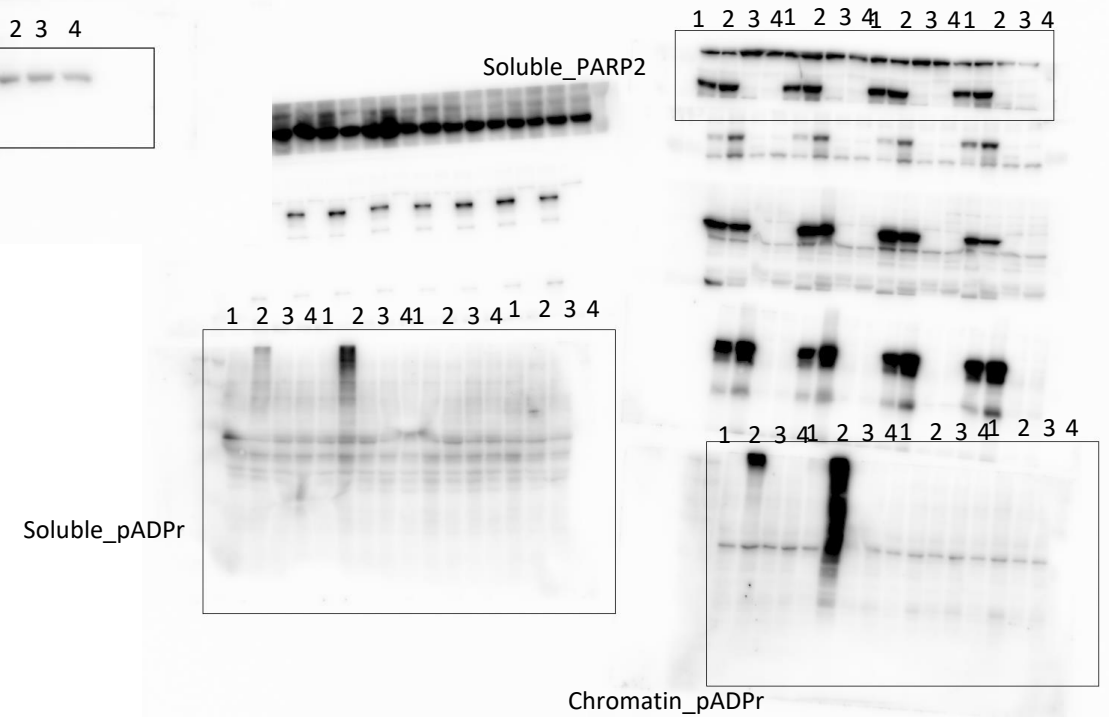

Figure 4-Figure Supplement 1

**B**

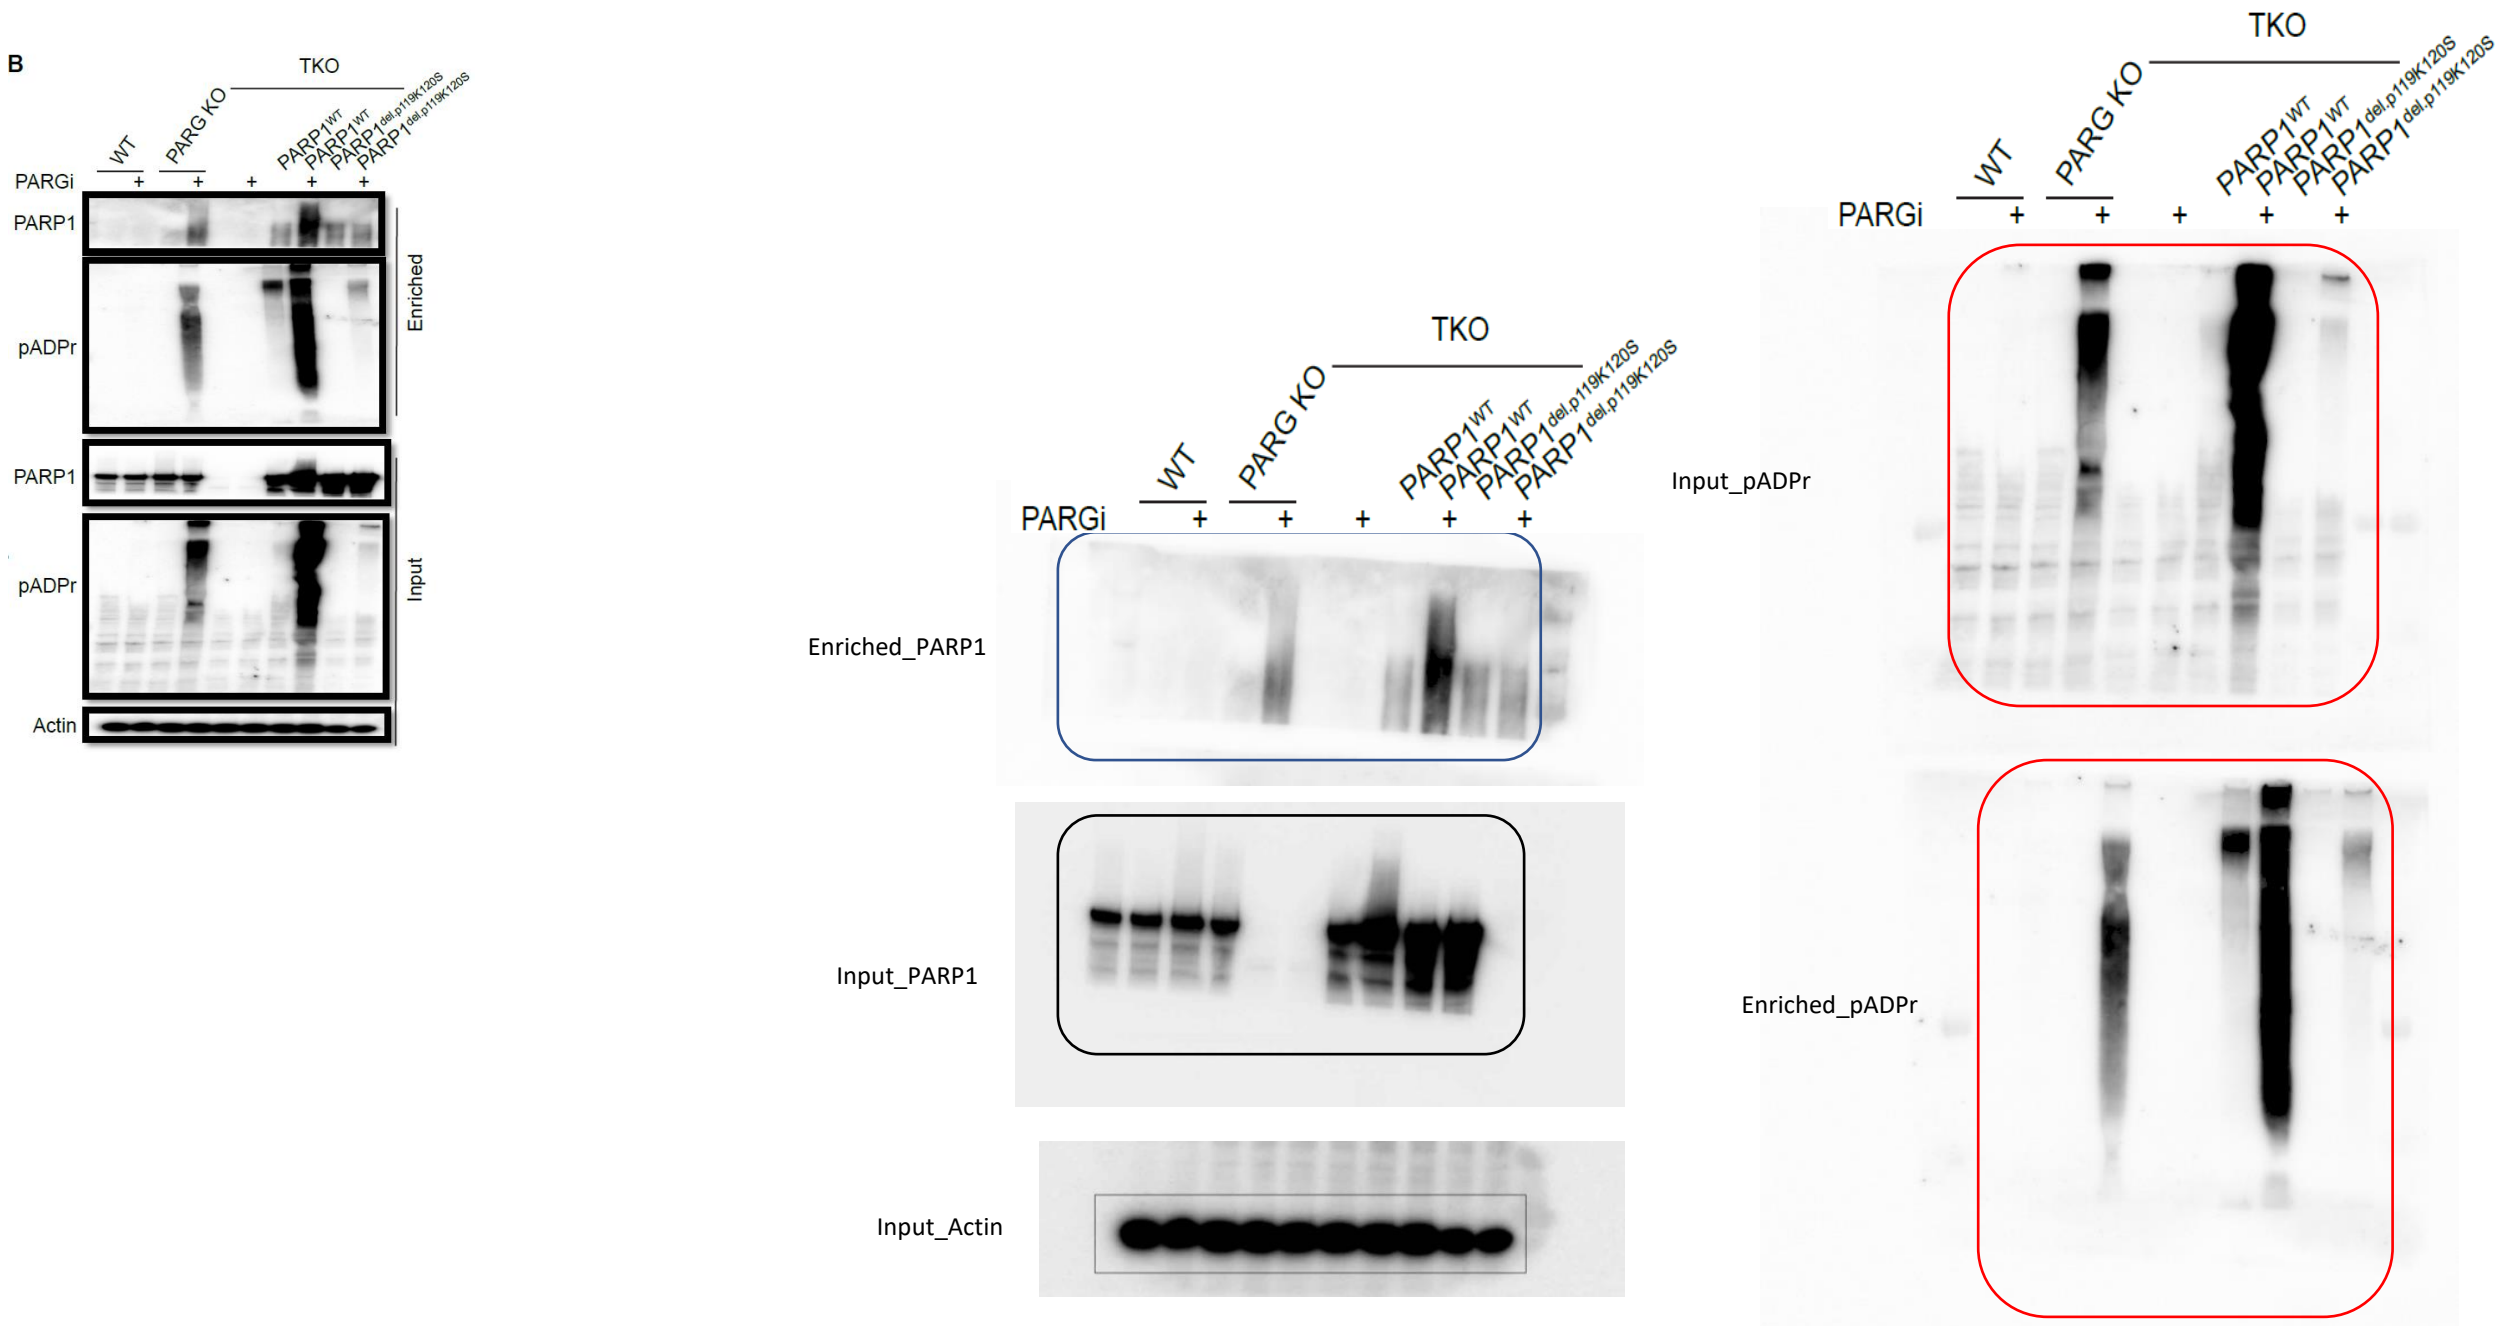

Figure 4-Figure Supplement 1

**E**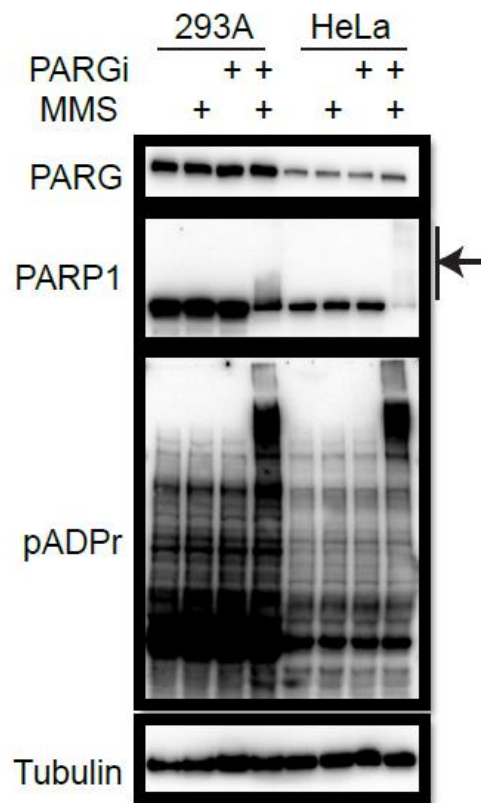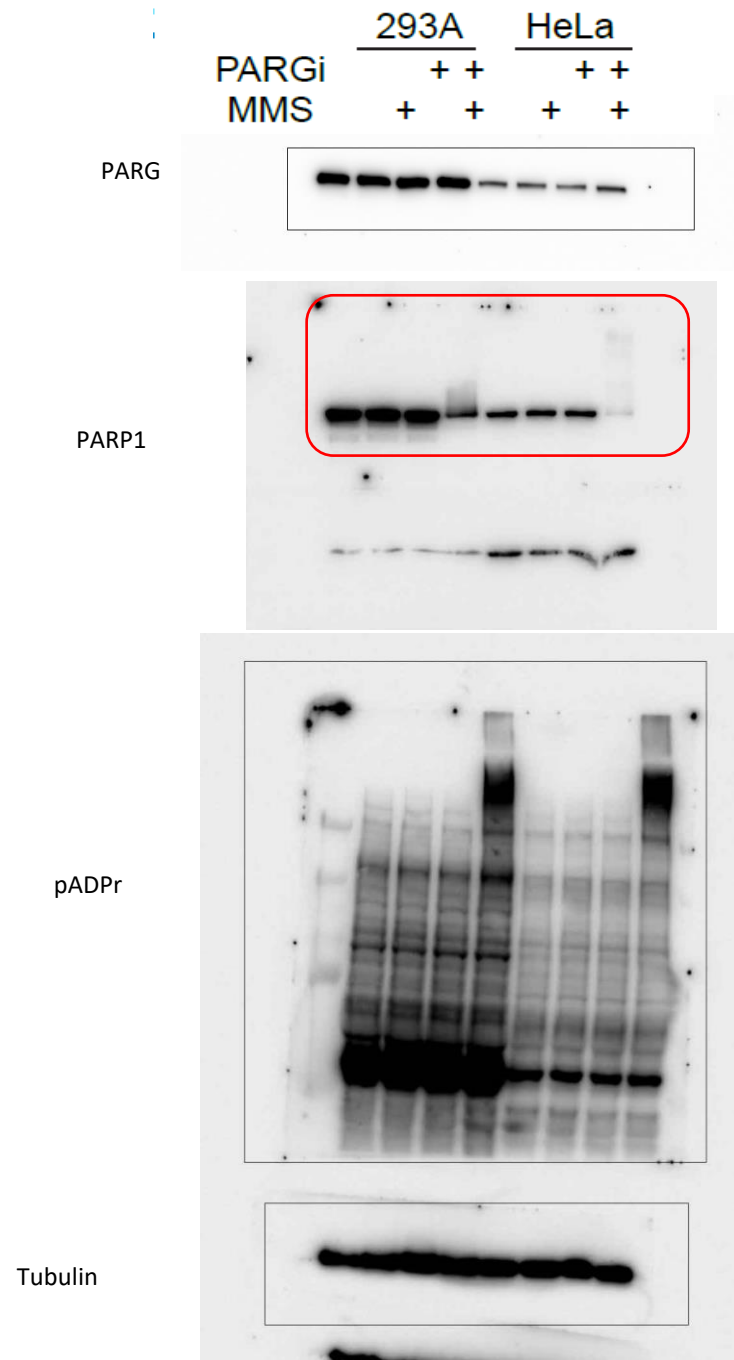

Figure 4-Figure Supplement 1

F

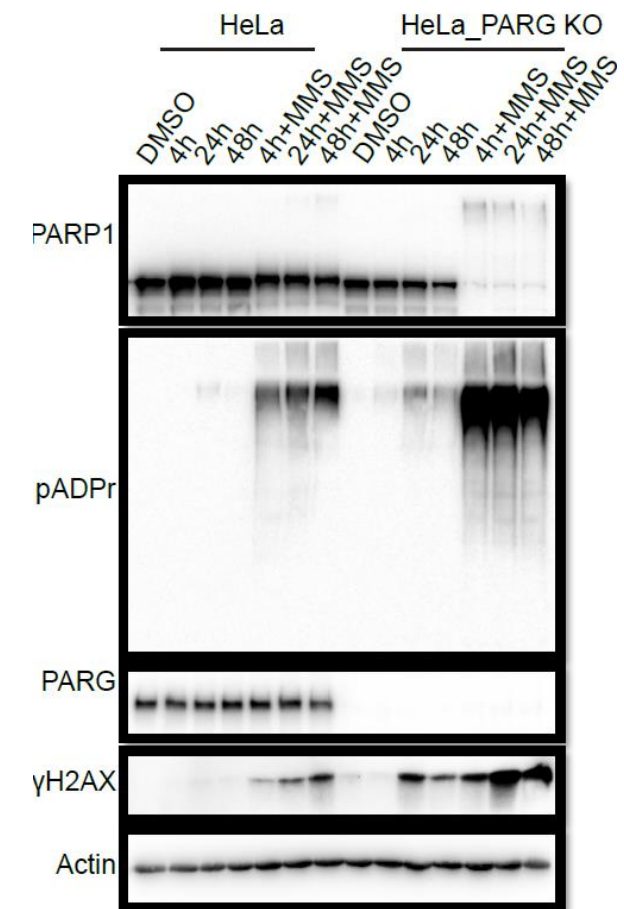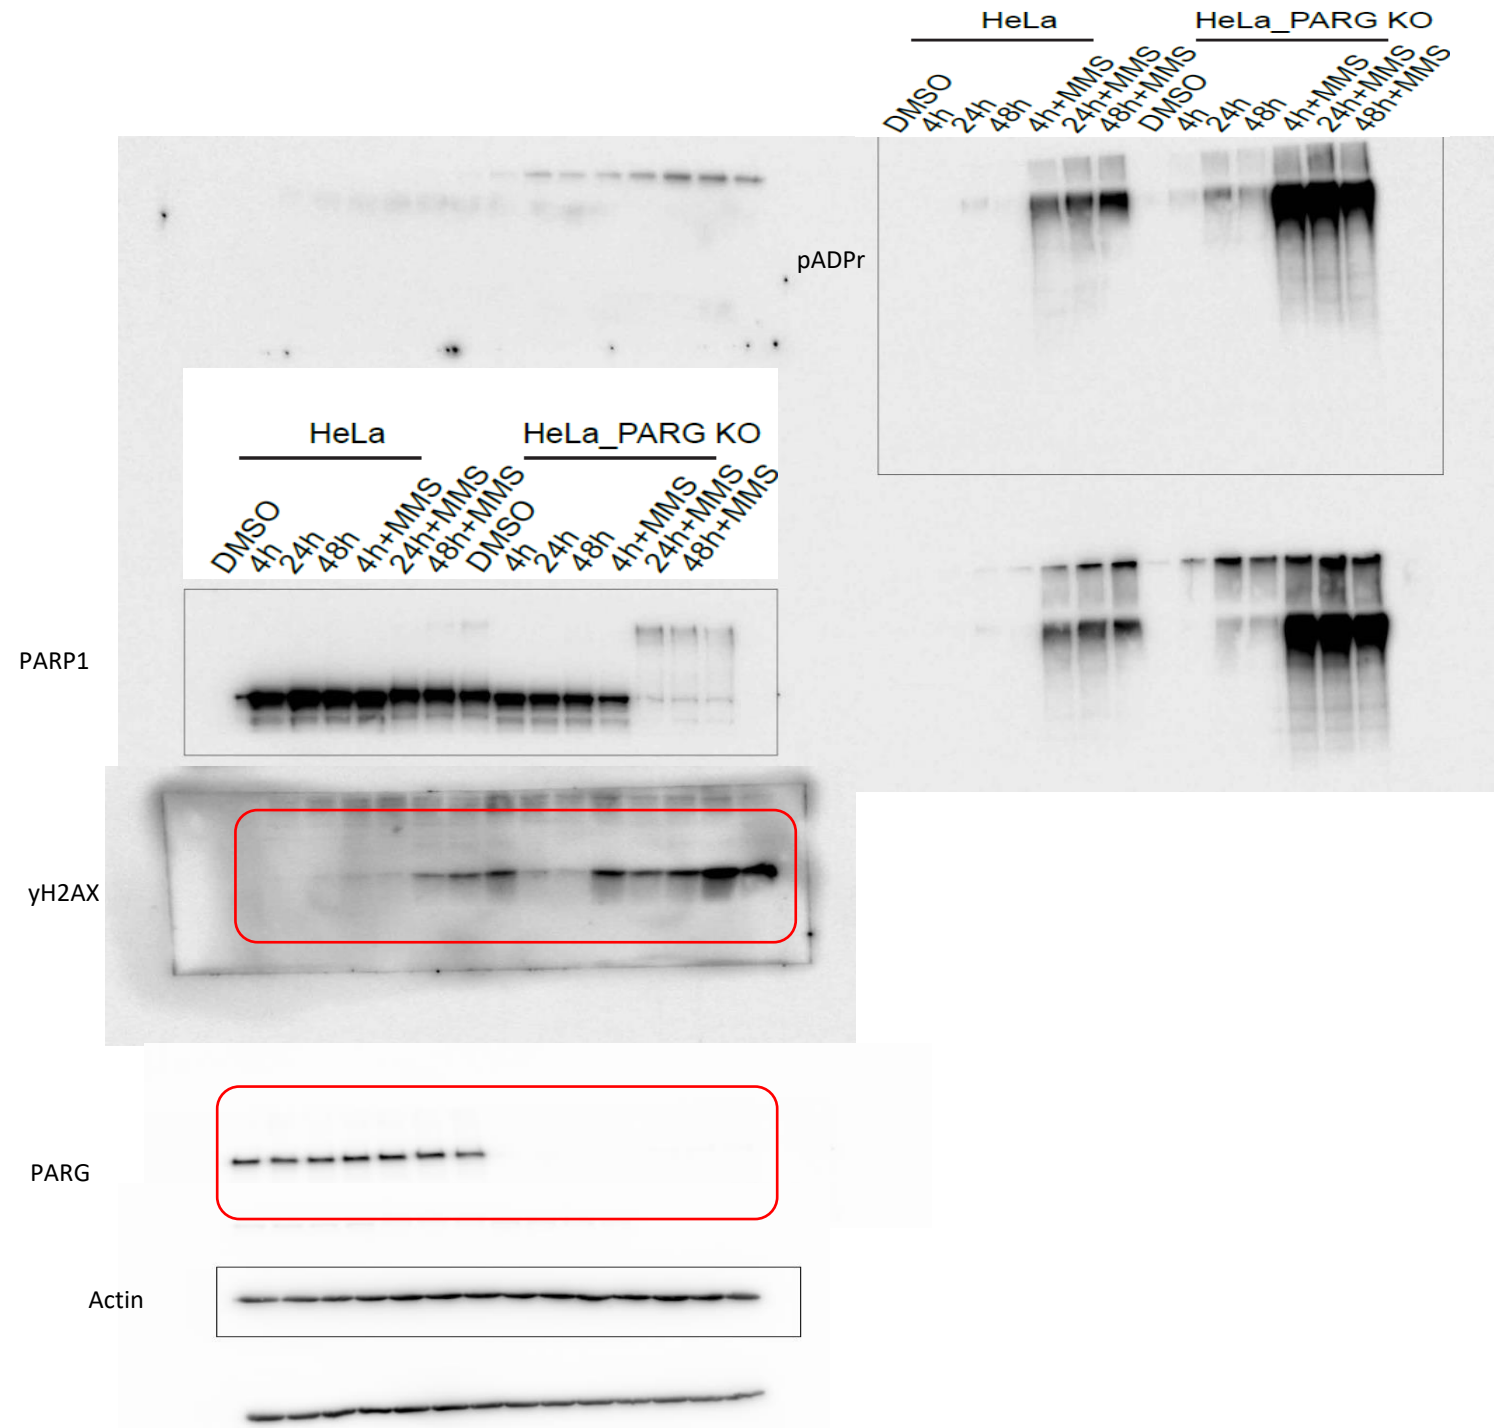

Figure 4-Figure Supplement 1
