# Supplementary material for: DePARylation is critical for S phase progression and cell survival
Source: eLife journal article supplement (doi:10.7554/elife.89303), 2023-09-28
Supplement: fig5-figsupp1-data3 [file elife-89303-fig5-figsupp1-data3-v1.zip]

B

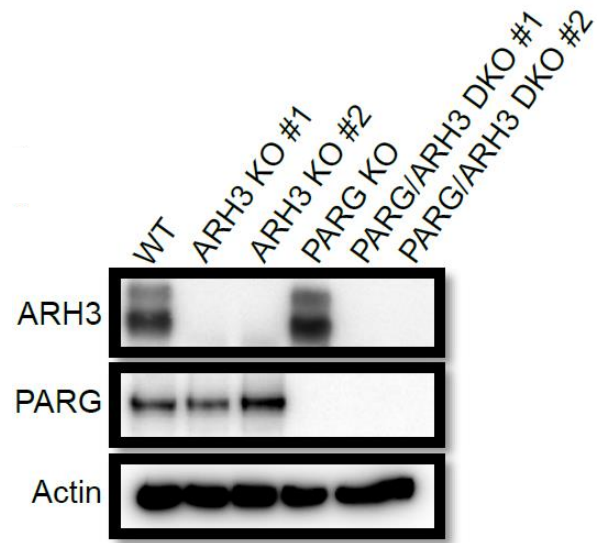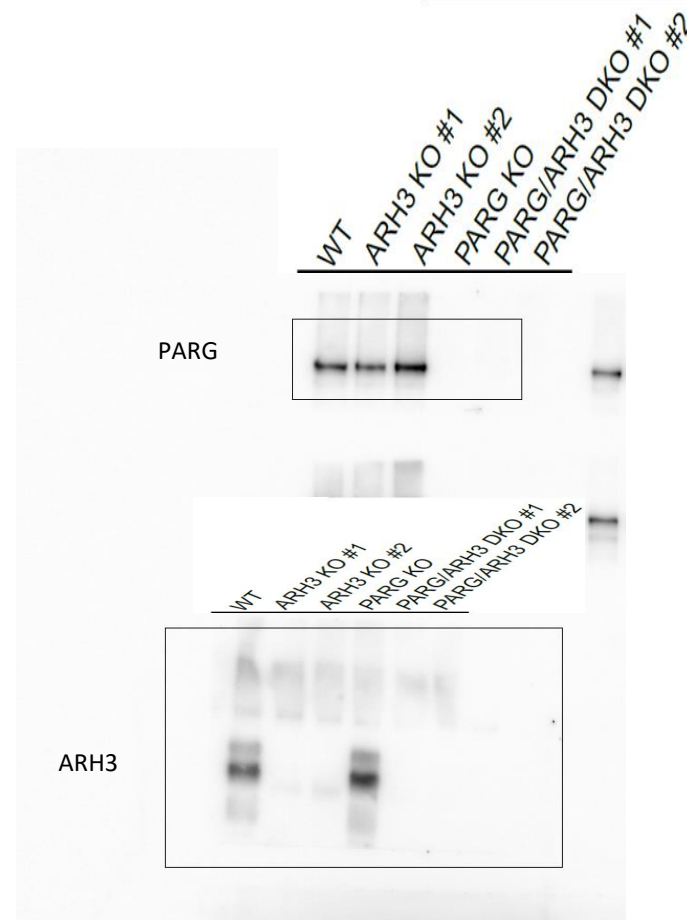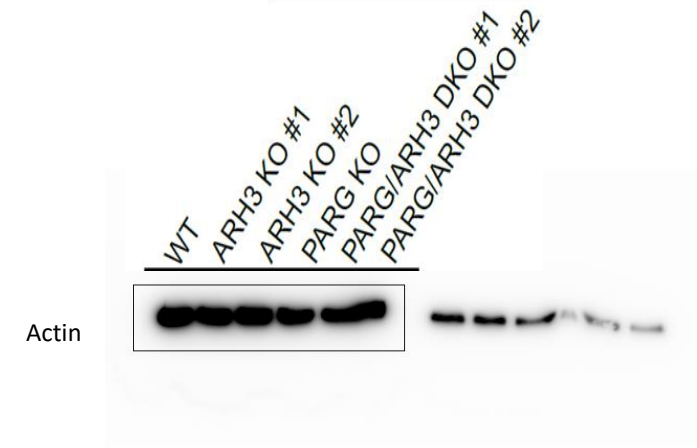

Figure 5-Figure Supplement 1

**C**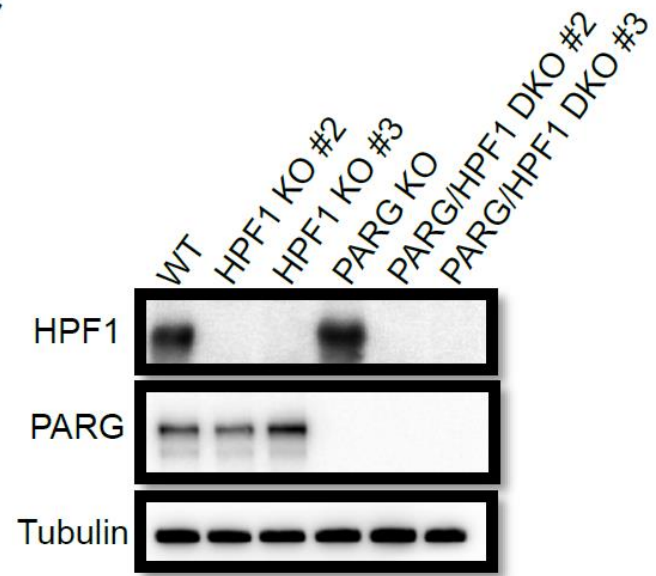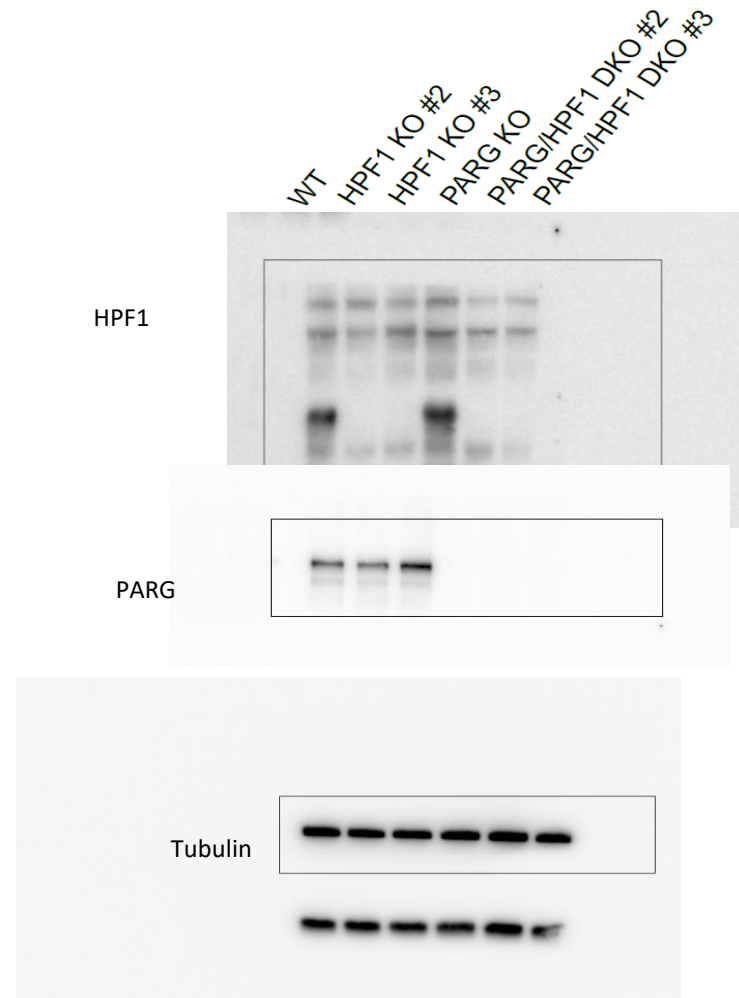

Figure 5-Figure Supplement 1

**D**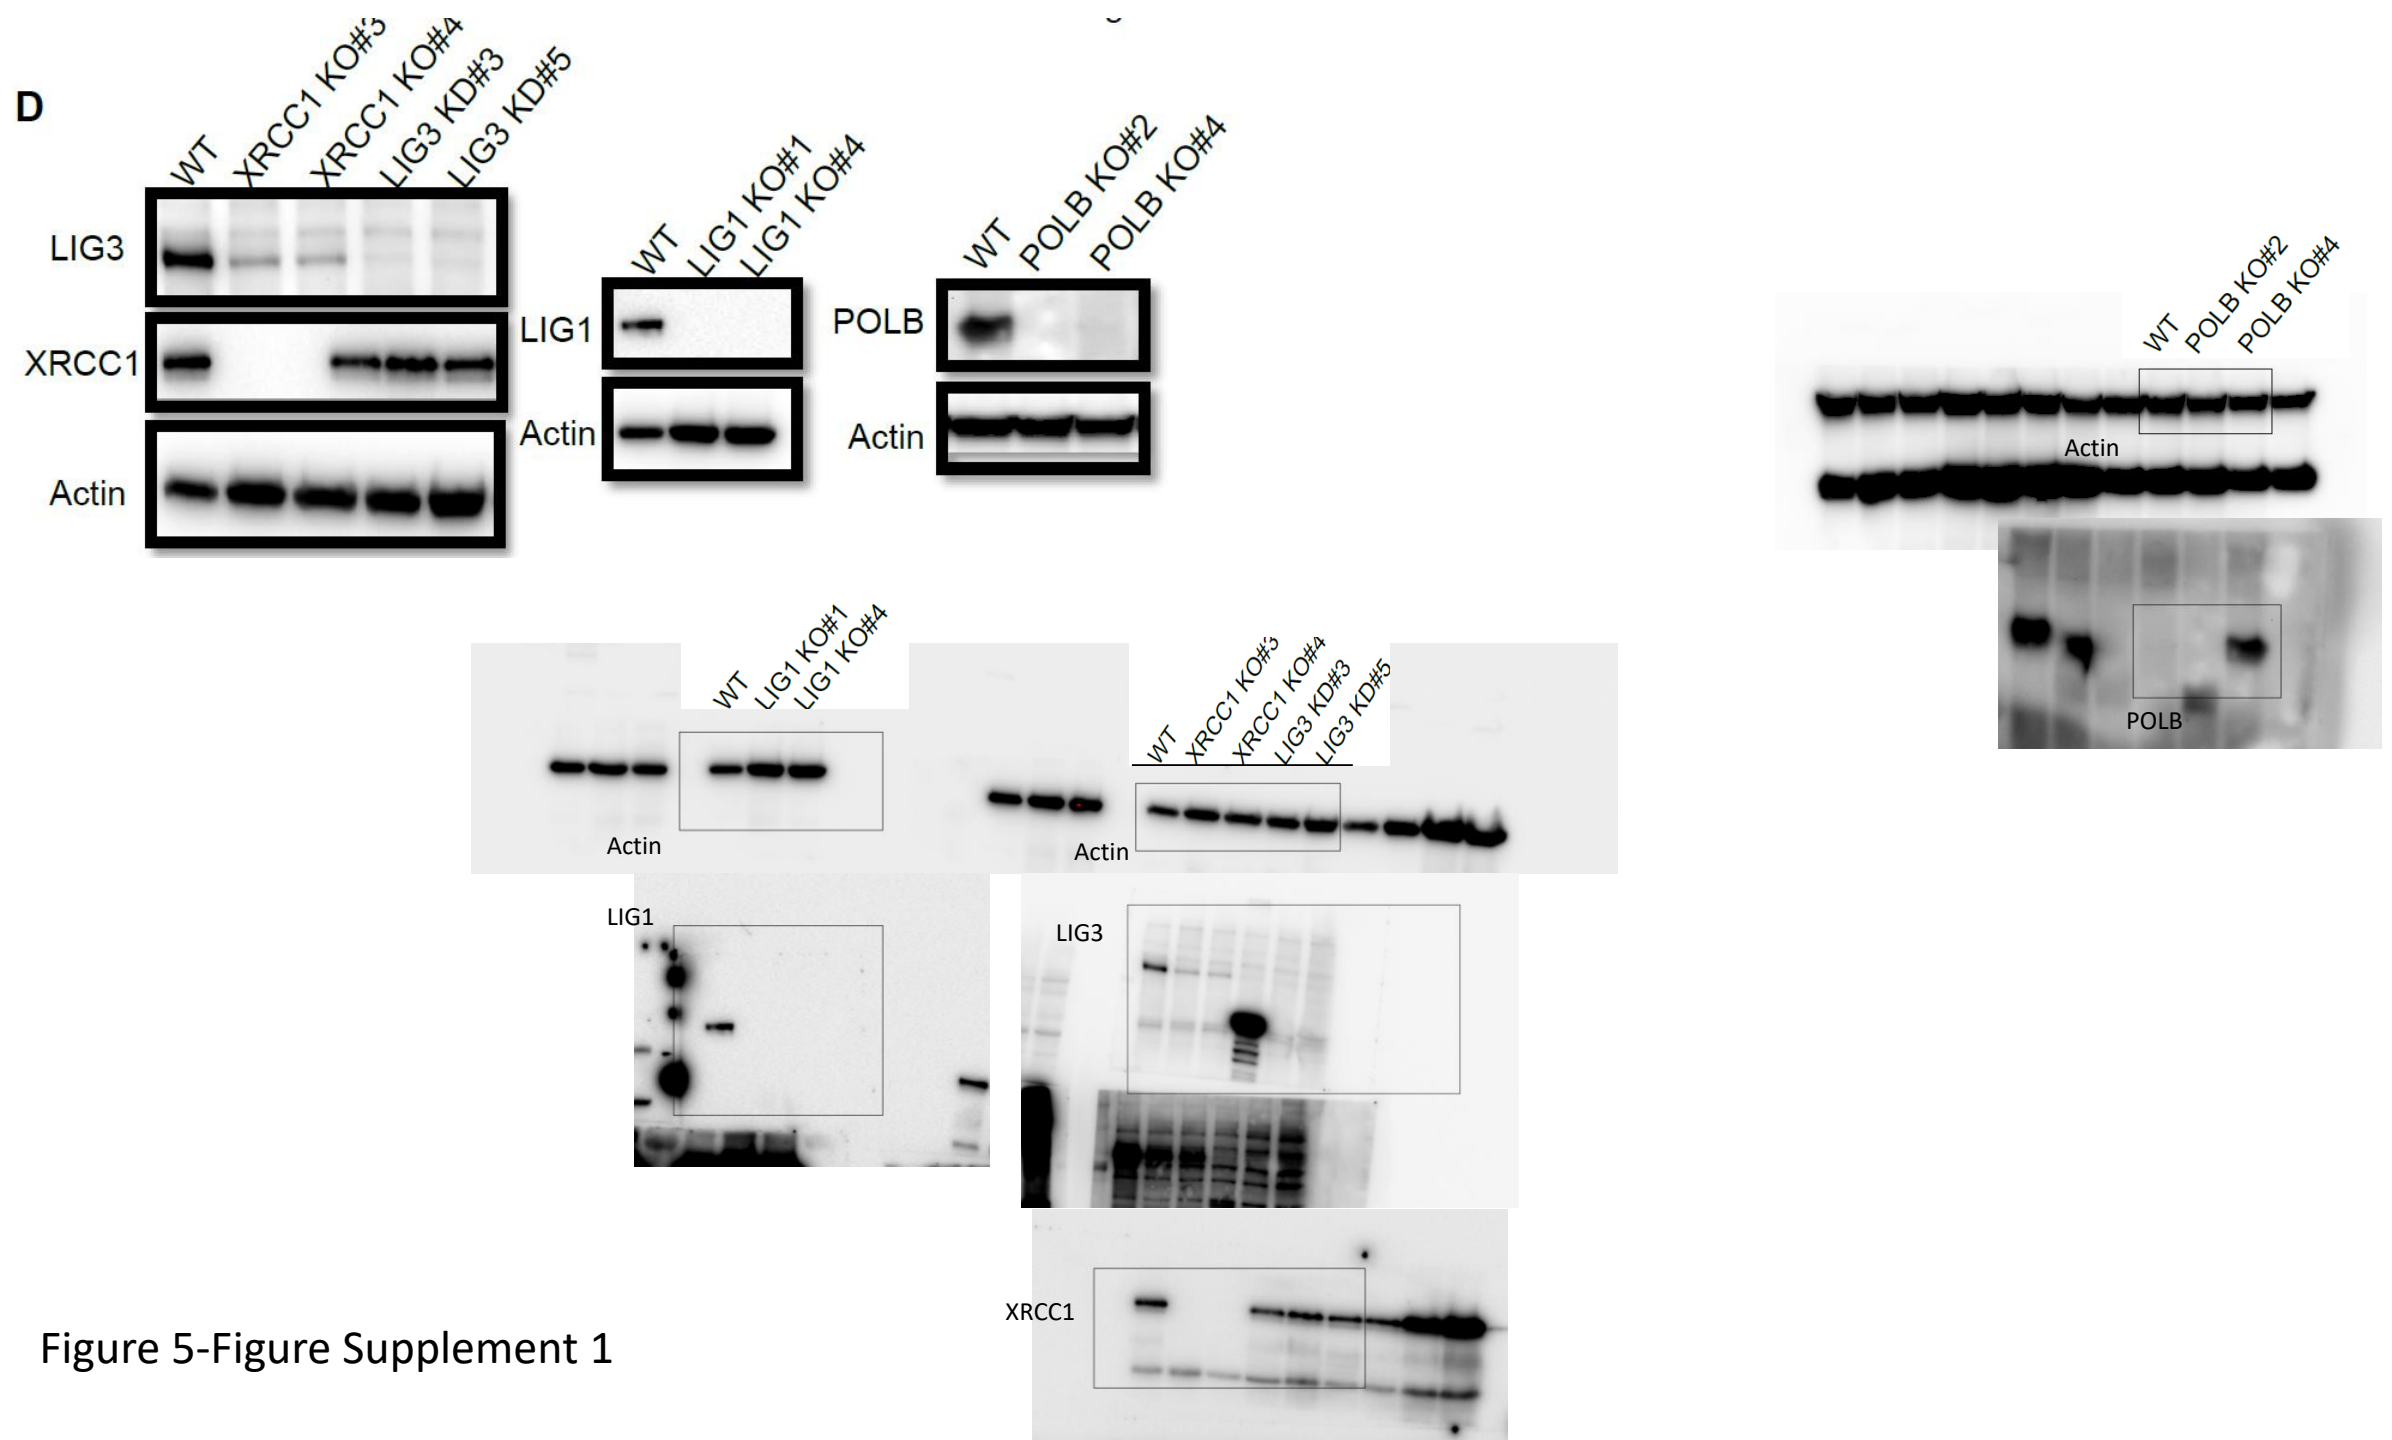

Figure 5-Figure Supplement 1

**F**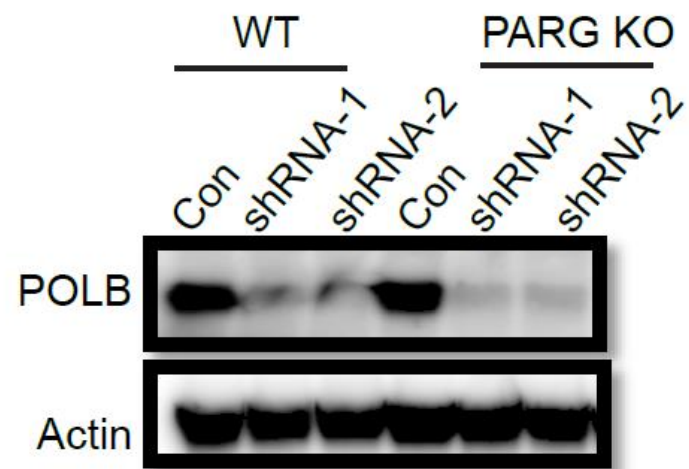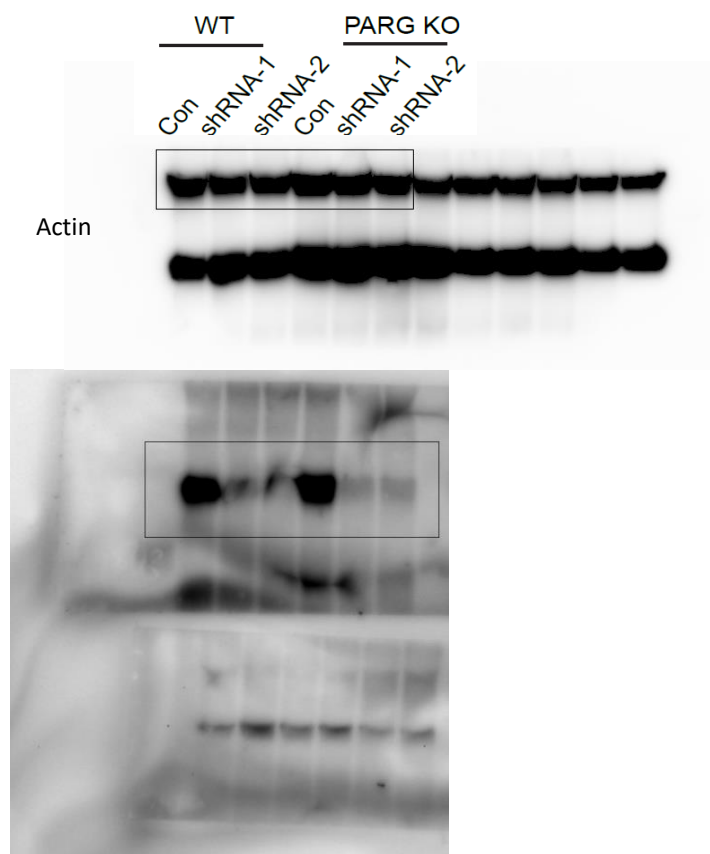

Figure 5-Figure Supplement 1
