# Supplementary material for: DePARylation is critical for S phase progression and cell survival
Source: eLife journal article supplement (doi:10.7554/elife.89303), 2023-09-28

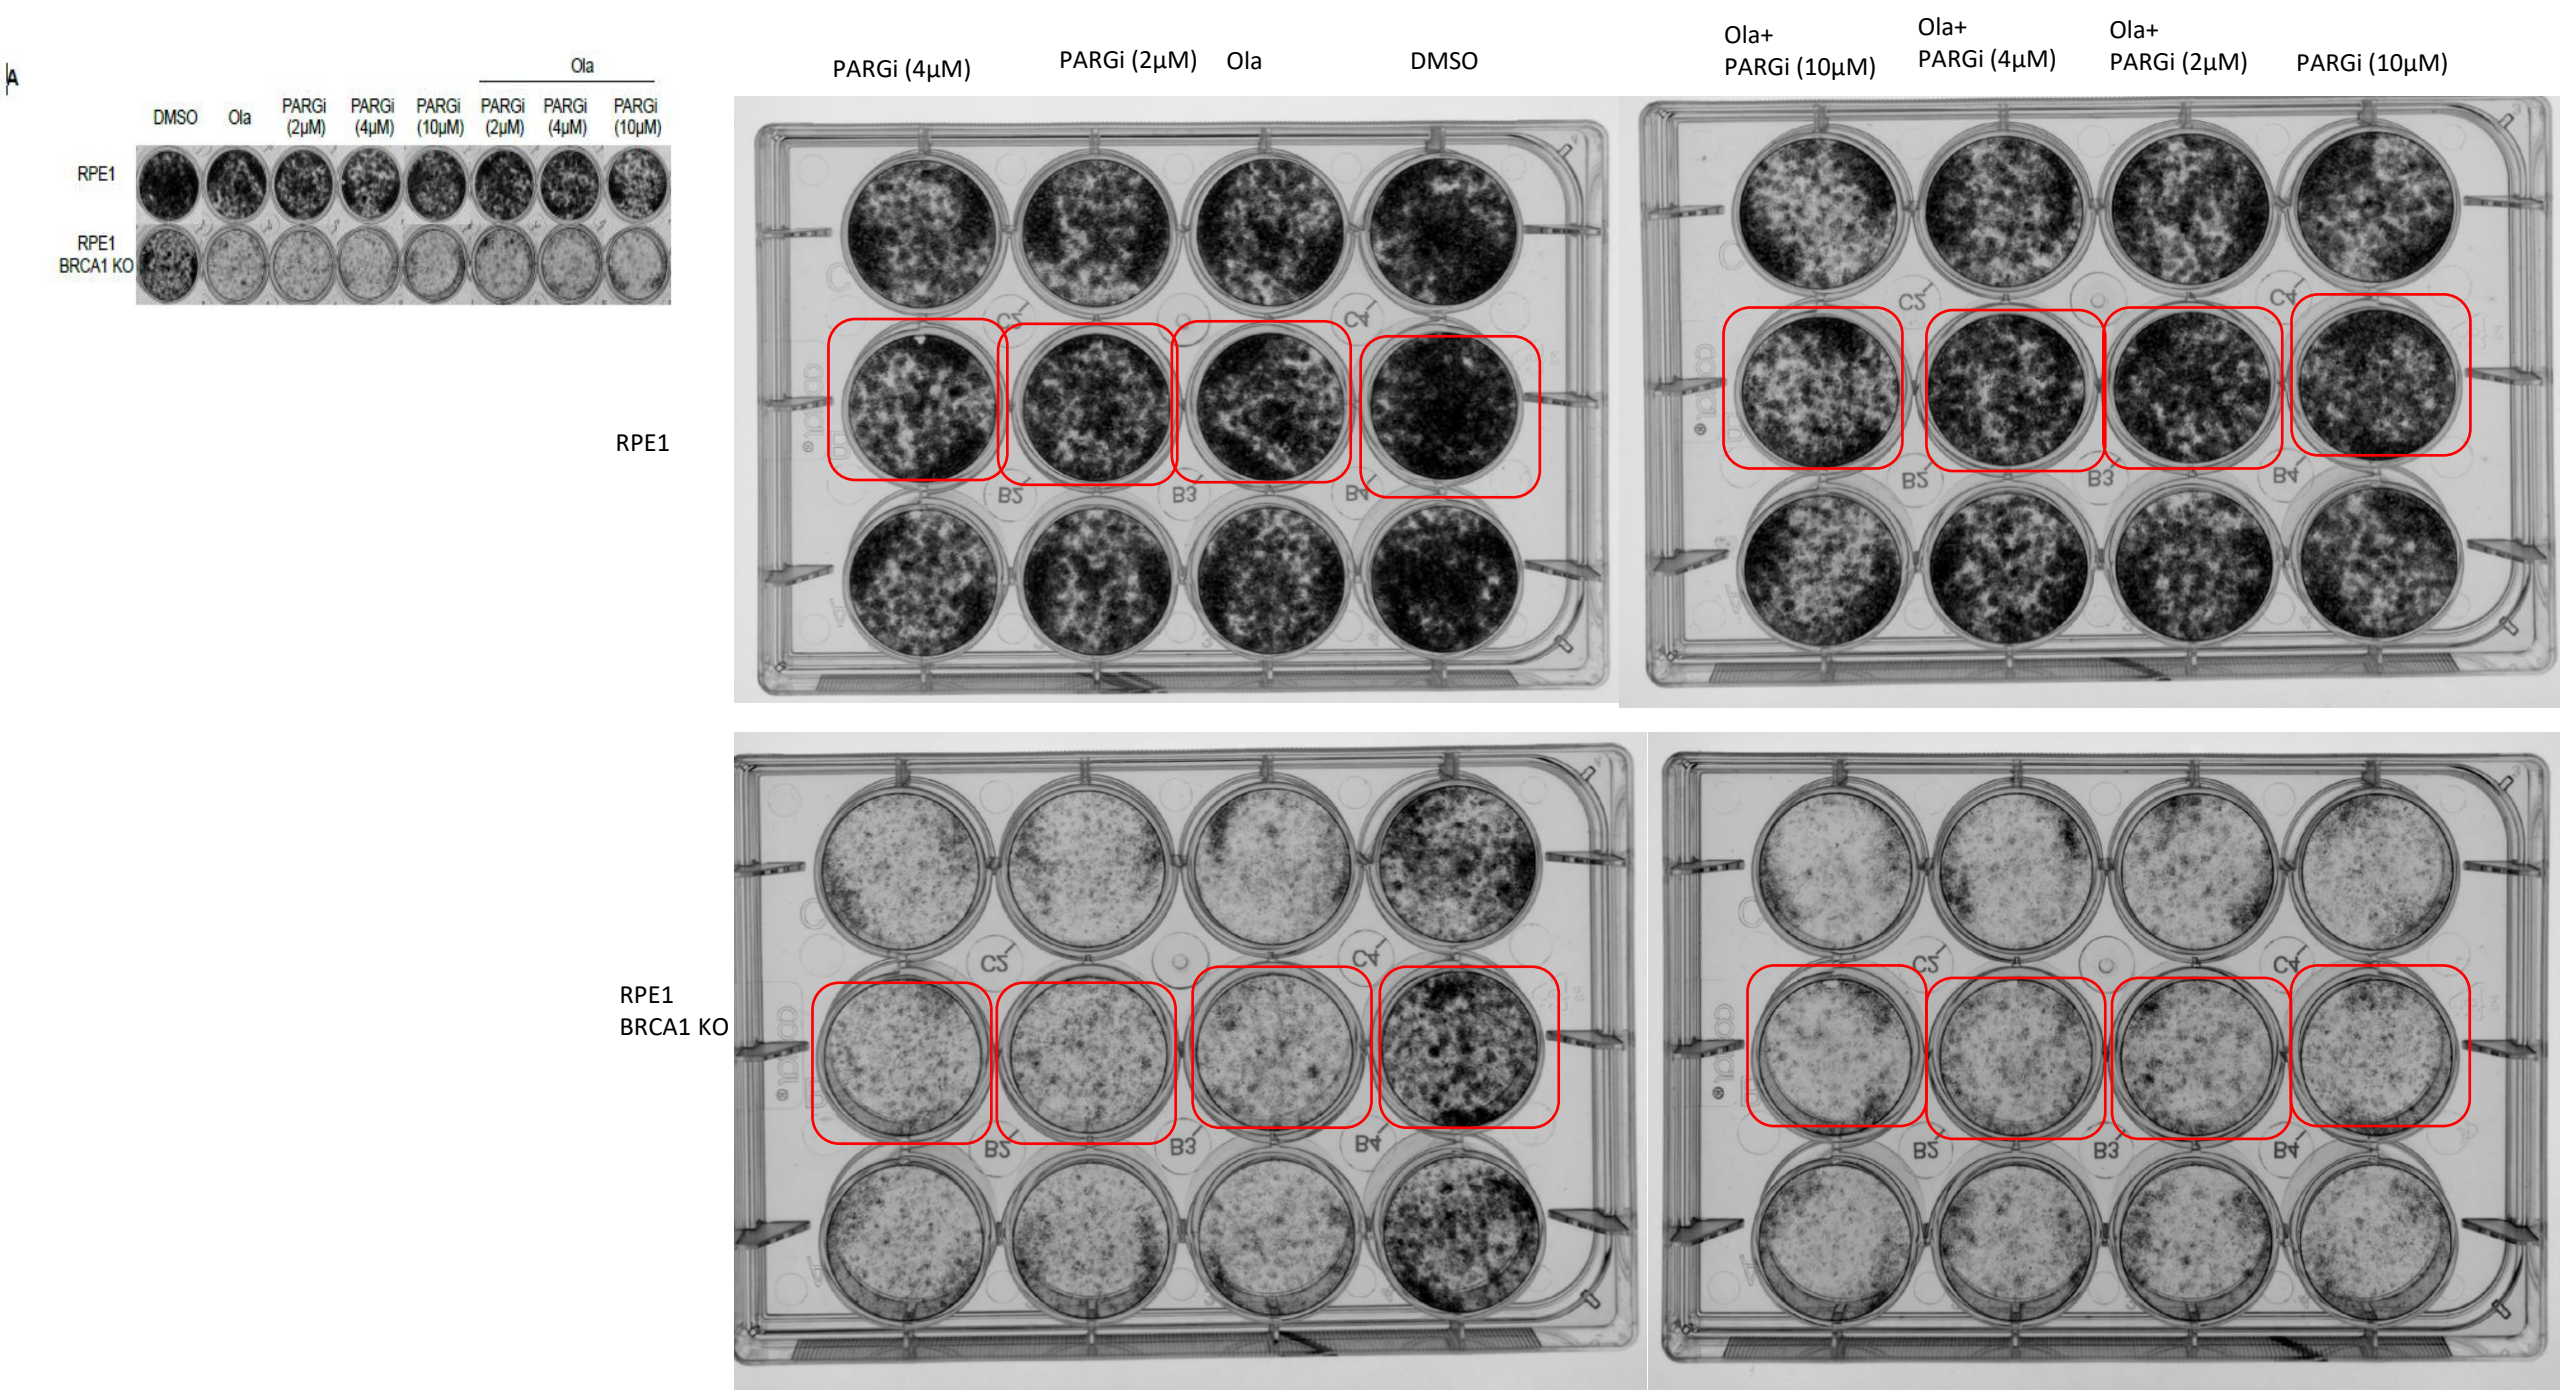

Figure 6-figure supplement 1

**B**

HeLa\_BRCA\_mAID

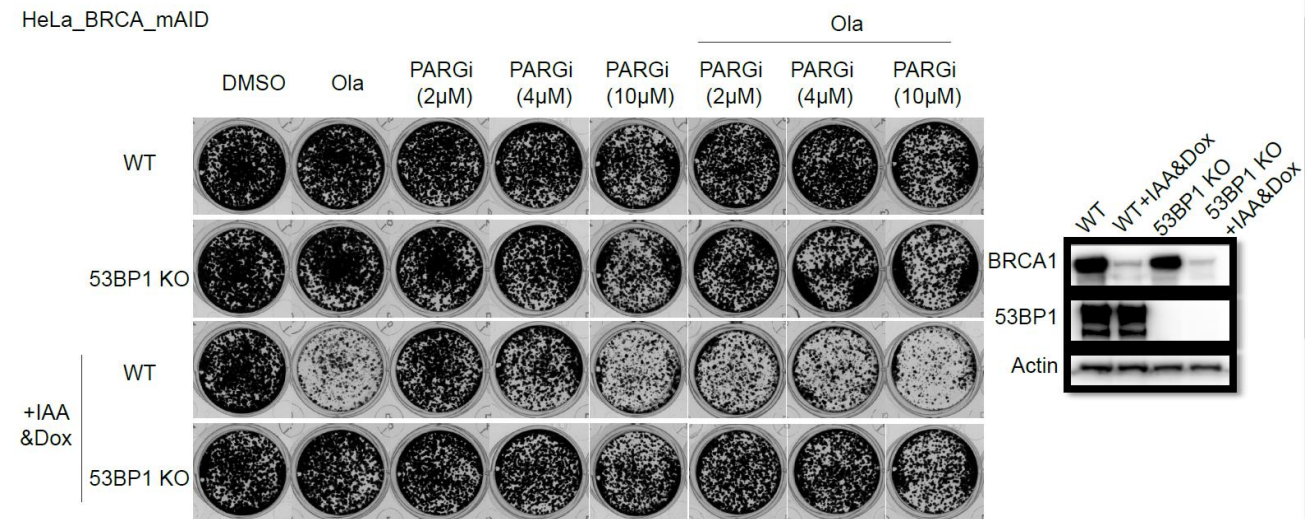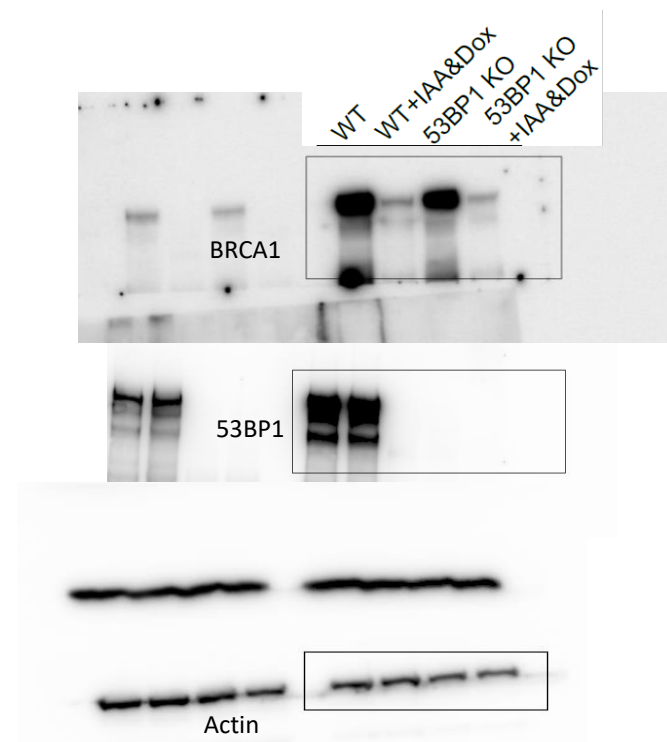

Figure 6-figure supplement 1



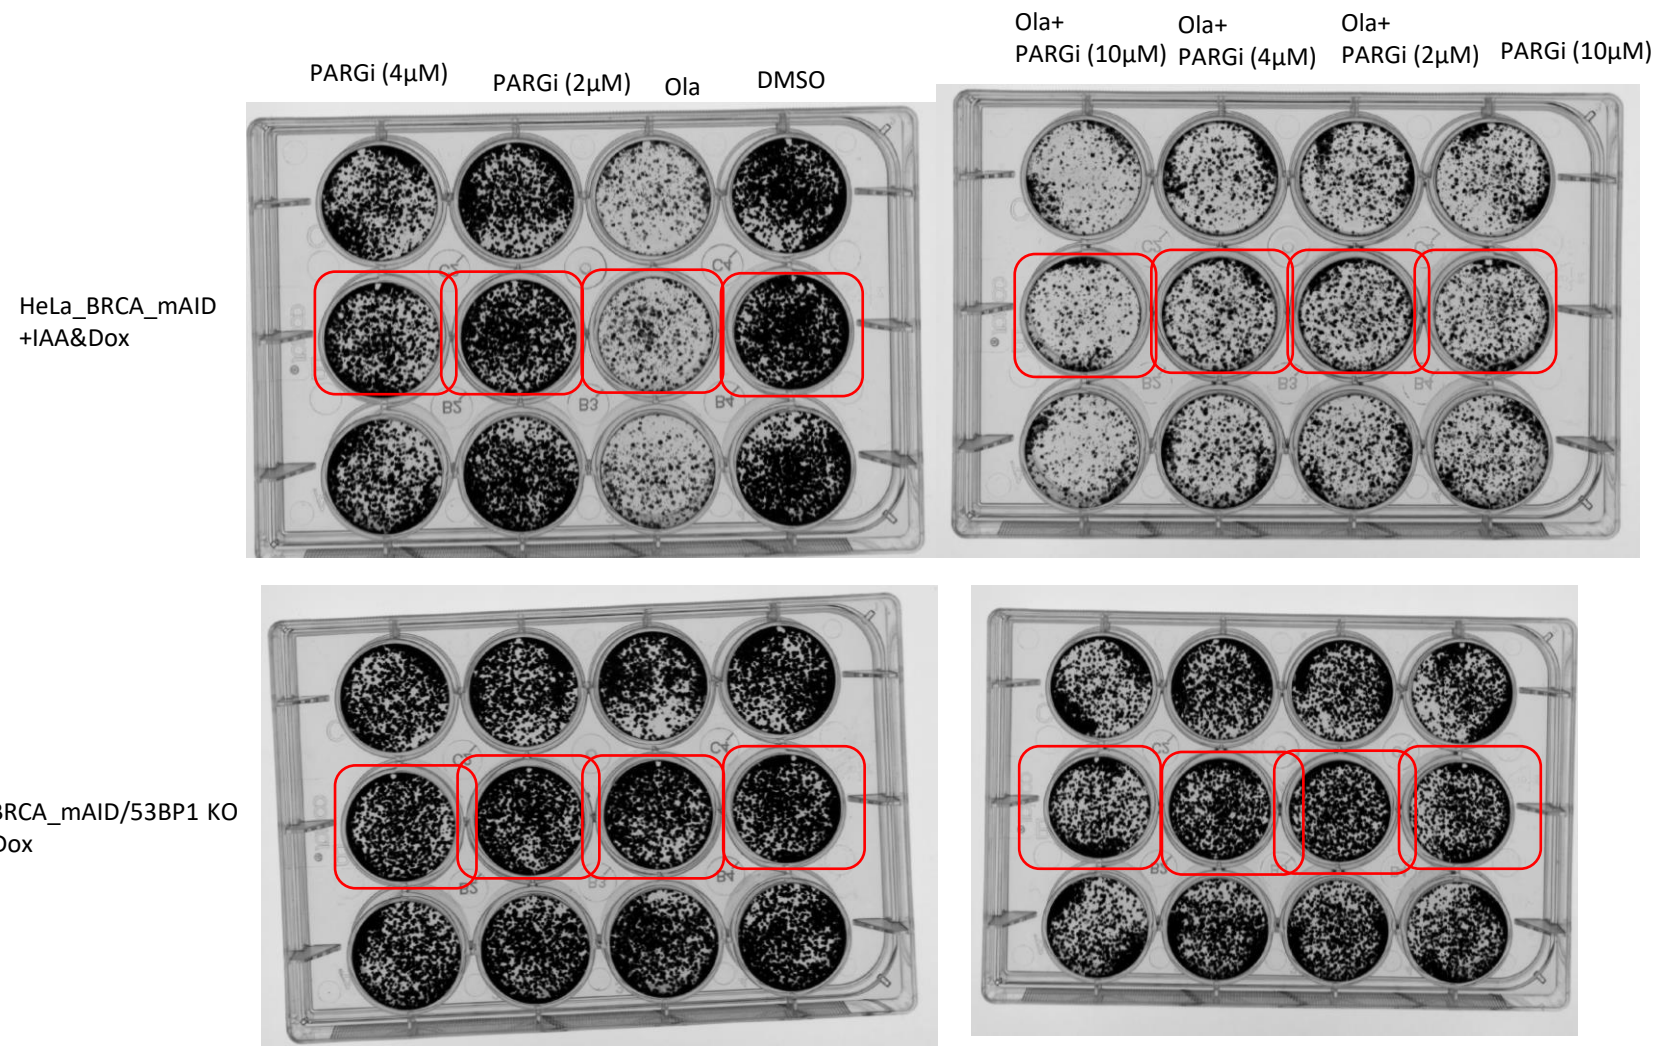

Figure 6-figure supplement 1

HeLa\_BRCA\_mAID

PARGi (4 $\mu$ M)    PARGi (2 $\mu$ M)    Ola    DMSO

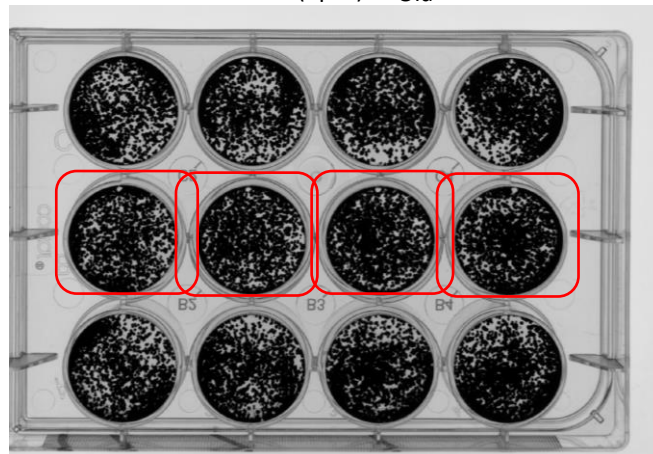

HeLa\_BRCA\_mAID/53BP1 KO

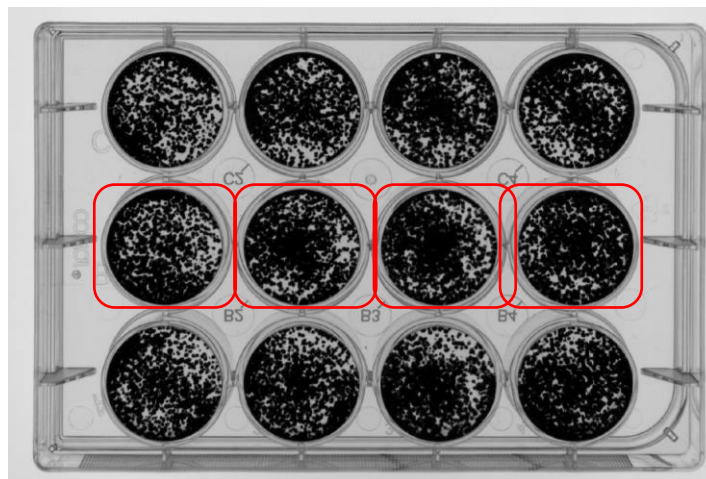

Ola+    Ola+    Ola+  
PARGi (10 $\mu$ M)    PARGi (4 $\mu$ M)    PARGi (2 $\mu$ M)    PARGi (10 $\mu$ M)

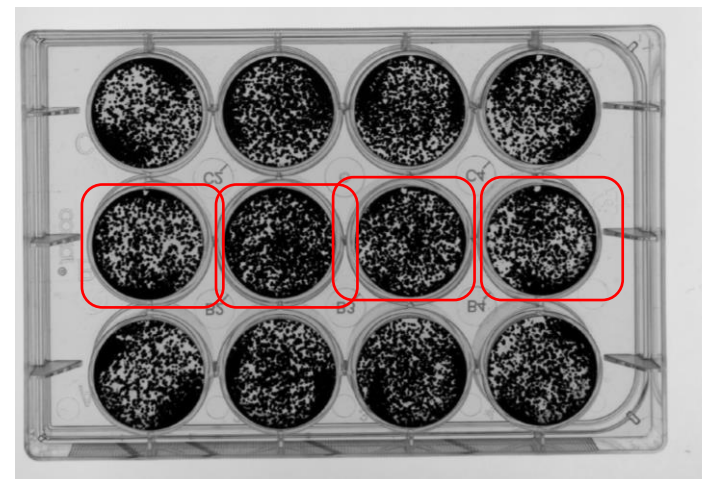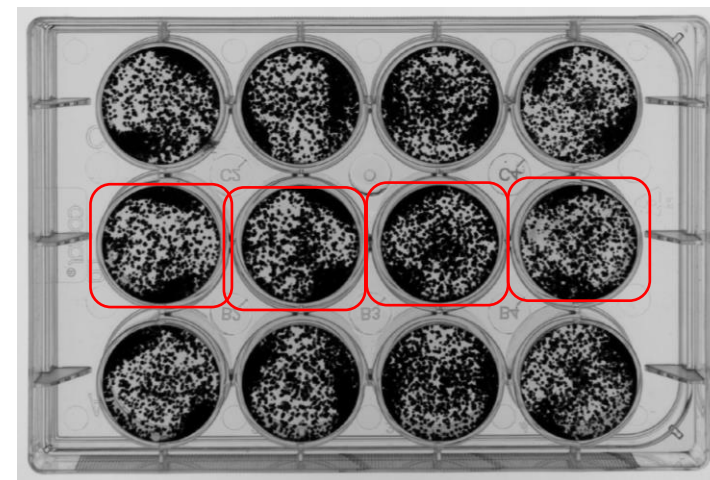

Supplement: fig6-figsupp1-data2 [file elife-89303-fig6-figsupp1-data2-v1.zip]
