# Supplementary material for: DePARylation is critical for S phase progression and cell survival
Source: eLife. 2024 Apr 5;12:RP89303. doi: 10.7554/eLife.89303 (PMC10997334; doi:10.7554/eLife.89303)
Supplement: Figure 1—source data 1. [file elife-89303-fig1-data1.xlsx]

## Sheet: Sheet1
GENE	sumZ	numObs	normZ	pval_synth	rank_synth	fdr_synth	pval_supp	rank_supp	fdr_supp
PARG	-168.57	30	-10.36	1.81e-25	1	8.32e-23	1	460	1
POLB	-108.94	30	-6.64	1.53e-11	2	3.53e-09	1	459	1
POLE3	-103.86	30	-6.33	1.25e-10	3	1.92e-08	1	458	1
EXO1	-94.99	30	-5.77	3.89e-09	4	4.48e-07	1	457	1
POLE4	-85.47	30	-5.18	1.11e-07	5	1.03e-05	1	456	1
RTEL1	-54.39	30	-3.24	0.000598	6	0.0458	0.999	455	1
BLM	-40.33	30	-2.36	0.00908	7	0.597	0.991	454	1
WDR48	-39.36	30	-2.3	0.0107	8	0.613	0.989	453	1
PCNA	-32.03	30	-1.84	0.0325	9	0.899	0.967	452	0.985
PIF1	-31.64	30	-1.82	0.0344	10	0.899	0.966	451	0.985
LIG1	-28.75	30	-1.64	0.0505	11	0.899	0.949	450	0.971
RFC1	-27.93	30	-1.59	0.056	12	0.899	0.944	449	0.967
RMI2	-27.76	30	-1.58	0.0572	13	0.899	0.943	448	0.967
GEN1	-27.74	30	-1.58	0.0574	14	0.899	0.943	447	0.967
TYMS	-26.44	30	-1.5	0.0673	15	0.899	0.933	446	0.962
NBN	-25.63	30	-1.45	0.0742	16	0.899	0.926	445	0.957
SPRTN	-25.47	30	-1.44	0.0756	17	0.899	0.924	444	0.957
SMC6	-23.35	30	-1.3	0.0963	18	0.899	0.904	443	0.938
PTEN	-23.2	30	-1.29	0.0979	19	0.899	0.902	442	0.938
RAD18	-22.53	30	-1.25	0.105	20	0.899	0.895	441	0.933
DCLRE1B	-21.36	30	-1.18	0.119	21	0.899	0.881	440	0.921
PRIM2	-21.03	30	-1.16	0.123	22	0.899	0.877	439	0.919
HELQ	-20.85	30	-1.15	0.126	23	0.899	0.874	438	0.918
USP1	-20.73	30	-1.14	0.127	24	0.899	0.873	437	0.918
CDC25B	-19.79	30	-1.08	0.14	25	0.899	0.86	436	0.907
TOPBP1	-19.53	30	-1.07	0.143	26	0.899	0.857	435	0.906
FANCM	-19.35	30	-1.05	0.146	27	0.899	0.854	434	0.905
RPA2	-19.34	30	-1.05	0.146	28	0.899	0.854	433	0.905
F13B	-19.31	30	-1.05	0.147	29	0.899	0.853	432	0.905
RMI1	-19.15	30	-1.04	0.149	30	0.899	0.851	431	0.905
EIF2S1	-18.93	30	-1.03	0.152	31	0.899	0.848	430	0.905
PRIM1	-18.87	30	-1.02	0.153	32	0.899	0.847	429	0.905
RFWD3	-18.13	30	-0.98	0.164	33	0.899	0.836	428	0.898
BRIP1	-17.54	30	-0.94	0.173	34	0.899	0.827	427	0.89
LIG4	-17.37	30	-0.93	0.176	35	0.899	0.824	426	0.89
WRN	-17.27	30	-0.92	0.178	36	0.899	0.822	425	0.89
TTK	-17.16	30	-0.92	0.18	37	0.899	0.82	424	0.89
UBE2T	-17.12	30	-0.91	0.18	38	0.899	0.82	423	0.89
HUS1	-17.04	30	-0.91	0.182	39	0.899	0.818	422	0.89
RPA1	-17	30	-0.91	0.182	40	0.899	0.818	421	0.89
FAAP100	-16.09	30	-0.85	0.198	41	0.899	0.802	420	0.879
DNA2	-15.88	30	-0.84	0.201	42	0.899	0.799	419	0.877
HFM1	-15.66	30	-0.82	0.205	43	0.899	0.795	418	0.875
FANCC	-15.47	30	-0.81	0.208	44	0.899	0.792	417	0.873
RAD23B	-15.42	30	-0.81	0.21	45	0.899	0.79	416	0.873
SETDB1	-15.33	30	-0.8	0.211	46	0.899	0.789	415	0.873
ATP6V1A	-14.99	30	-0.78	0.217	47	0.899	0.783	414	0.87
RNF8	-14.92	30	-0.78	0.219	48	0.899	0.781	413	0.87
RAD1	-14.77	30	-0.77	0.221	49	0.899	0.779	412	0.869
UIMC1	-14.62	30	-0.76	0.224	50	0.899	0.776	411	0.868
UBE2N	-13.49	27	-0.73	0.232	51	0.899	0.768	410	0.862
UBE2V2	-12.69	24	-0.73	0.232	52	0.899	0.768	409	0.862
POLI	-14.16	30	-0.73	0.233	53	0.899	0.767	408	0.862
POLR3C	-13.64	30	-0.7	0.243	54	0.899	0.757	407	0.856
PLA2G2F	-13.63	30	-0.7	0.243	55	0.899	0.757	406	0.856
XRCC5	-13.63	30	-0.7	0.243	56	0.899	0.757	405	0.856
RAD17	-13.28	30	-0.68	0.25	57	0.899	0.75	404	0.854
MDM2	-13.19	30	-0.67	0.252	58	0.899	0.748	403	0.854
RAD51C	-13.07	30	-0.66	0.254	59	0.899	0.746	402	0.853
PPP4R1	-12.72	30	-0.64	0.261	60	0.899	0.739	401	0.848
BRCA1	-12.59	30	-0.63	0.264	61	0.899	0.736	400	0.847
MLH3	-12.55	30	-0.63	0.265	62	0.899	0.735	399	0.847
ZRANB3	-12.49	30	-0.63	0.266	63	0.899	0.734	398	0.847
ARCN1	-12.43	30	-0.62	0.267	64	0.899	0.733	397	0.847
SERPINB12	-12.36	30	-0.62	0.269	65	0.899	0.731	396	0.847
TSSK1B	-12.2	30	-0.61	0.272	66	0.899	0.728	395	0.847
MSH5	-12.17	30	-0.61	0.272	67	0.899	0.728	394	0.847
FANCD2	-12.02	30	-0.6	0.276	68	0.899	0.724	393	0.847
CUL5	-11.95	30	-0.59	0.277	69	0.899	0.723	392	0.847
TOP1	-11.94	30	-0.59	0.277	70	0.899	0.723	391	0.847
NPM1	-3.77	3	-0.59	0.278	71	0.899	0.722	390	0.847
NABP1	-11.79	30	-0.58	0.28	72	0.899	0.72	389	0.847
DCLRE1A	-11.73	30	-0.58	0.282	73	0.899	0.718	388	0.847
UBE2A	-11.6	30	-0.57	0.284	74	0.899	0.716	387	0.847
PARPBP	-11.44	30	-0.56	0.288	75	0.899	0.712	386	0.847
ENDOV	-11.23	30	-0.55	0.292	76	0.899	0.708	385	0.846
HSP90AA1	-11.11	30	-0.54	0.295	77	0.899	0.705	384	0.845
TPH2	-10.99	30	-0.53	0.297	78	0.899	0.703	383	0.844
FEN1	-10.92	30	-0.53	0.299	79	0.899	0.701	382	0.844
FANCL	-10.86	30	-0.52	0.3	80	0.899	0.7	381	0.844
MBD4	-10.72	30	-0.51	0.303	81	0.899	0.697	380	0.843
ASCC1	-10.7	30	-0.51	0.304	82	0.899	0.696	379	0.843
GLRA2	-10.68	30	-0.51	0.304	83	0.899	0.696	378	0.843
RFC3	-10.65	30	-0.51	0.305	84	0.899	0.695	377	0.843
FANCA	-10.59	30	-0.51	0.306	85	0.899	0.694	376	0.843
MMS22L	-10.56	30	-0.51	0.307	86	0.899	0.693	375	0.843
ETAA1	-10.53	30	-0.5	0.307	87	0.899	0.693	374	0.843
PRKDC	-10.2	30	-0.48	0.315	88	0.899	0.685	373	0.843
SLC13A1	-10.11	30	-0.48	0.317	89	0.899	0.683	372	0.843
MCM5	-10.08	30	-0.48	0.317	90	0.899	0.683	371	0.843
TIMELESS	-10.02	30	-0.47	0.319	91	0.899	0.681	370	0.843
BABAM2	-9.93	30	-0.47	0.321	92	0.899	0.679	369	0.843
BMP15	-9.8	30	-0.46	0.324	93	0.899	0.676	368	0.843
SCAI	-9.68	30	-0.45	0.326	94	0.899	0.674	367	0.843
ERI2	-9.66	30	-0.45	0.327	95	0.899	0.673	366	0.843
SLC36A3	-9.58	30	-0.44	0.329	96	0.899	0.671	365	0.843
PPP4C	-9.5	30	-0.44	0.33	97	0.899	0.67	364	0.843
FAAP24	-9.3	30	-0.43	0.335	98	0.899	0.665	363	0.843
SWI5	-9.26	30	-0.42	0.336	99	0.899	0.664	362	0.843
ALDH18A1	-9.23	30	-0.42	0.336	100	0.899	0.664	361	0.843
ALKBH3	-9.21	30	-0.42	0.337	101	0.899	0.663	360	0.843
DGAT2L6	-9.14	30	-0.42	0.338	102	0.899	0.662	359	0.843
ADH7	-9.1	30	-0.41	0.339	103	0.899	0.661	358	0.843
RAD50	-8.82	30	-0.4	0.346	104	0.899	0.654	357	0.843
WRNIP1	-8.76	30	-0.39	0.347	105	0.899	0.653	356	0.843
DCLRE1C	-8.73	30	-0.39	0.348	106	0.899	0.652	355	0.843
DNTT	-8.67	30	-0.39	0.349	107	0.899	0.651	354	0.843
INIP	-6.12	15	-0.39	0.35	108	0.899	0.65	353	0.843
ATM	-8.5	30	-0.38	0.353	109	0.899	0.647	352	0.843
BRCC3	-8.44	30	-0.37	0.355	110	0.899	0.645	351	0.843
CHTF18	-8.29	30	-0.36	0.358	111	0.899	0.642	350	0.843
FANCB	-8.28	30	-0.36	0.358	112	0.899	0.642	349	0.843
CLDN17	-8.06	30	-0.35	0.364	113	0.899	0.636	348	0.841
ERCC6	-7.96	30	-0.34	0.366	114	0.899	0.634	347	0.841
ALDH9A1	-7.7	30	-0.33	0.372	115	0.899	0.628	346	0.835
ERCC4	-7.62	30	-0.32	0.374	116	0.899	0.626	345	0.835
H2AFX	-7.59	30	-0.32	0.374	117	0.899	0.626	344	0.835
RDM1	-7.55	30	-0.32	0.376	118	0.899	0.624	343	0.835
ERCC6L	-7.48	30	-0.31	0.377	119	0.899	0.623	342	0.835
SOX4	-7.46	30	-0.31	0.378	120	0.899	0.622	341	0.835
PPP3R2	-7.46	30	-0.31	0.378	121	0.899	0.622	340	0.835
CST9	-7.23	30	-0.3	0.383	122	0.899	0.617	339	0.835
REV3L	-7.16	30	-0.29	0.385	123	0.899	0.615	338	0.835
NEIL3	-7.01	30	-0.28	0.388	124	0.899	0.612	337	0.835
POLL	-6.99	30	-0.28	0.389	125	0.899	0.611	336	0.835
ALDH8A1	-6.96	30	-0.28	0.39	126	0.899	0.61	335	0.835
FIGNL1	-6.94	30	-0.28	0.39	127	0.899	0.61	334	0.835
CXorf66	-6.93	30	-0.28	0.39	128	0.899	0.61	333	0.835
PPP4R2	-2.19	3	-0.28	0.391	129	0.899	0.609	332	0.835
CDK7	-6.91	30	-0.28	0.391	130	0.899	0.609	331	0.835
TOP3B	-6.82	30	-0.27	0.393	131	0.899	0.607	330	0.835
ORAOV1	-6.76	30	-0.27	0.394	132	0.899	0.606	329	0.835
REV1	-6.68	30	-0.26	0.396	133	0.899	0.604	328	0.835
CHD2	-6.49	30	-0.25	0.401	134	0.899	0.599	327	0.835
AEN	-6.44	30	-0.25	0.402	135	0.899	0.598	326	0.835
LUC7L3	-6.42	30	-0.25	0.403	136	0.899	0.597	325	0.835
BHLHE40	-6.34	30	-0.24	0.404	137	0.899	0.596	324	0.835
PMS1	-6.26	30	-0.24	0.406	138	0.899	0.594	323	0.835
FANCF	-6.21	30	-0.23	0.408	139	0.899	0.592	322	0.835
WDR43	-6.2	30	-0.23	0.408	140	0.899	0.592	321	0.835
GRB2	-6.19	30	-0.23	0.408	141	0.899	0.592	320	0.835
RFC5	-6.16	30	-0.23	0.409	142	0.899	0.591	319	0.835
HLTF	-6.12	30	-0.23	0.41	143	0.899	0.59	318	0.835
NSMCE2	-6.12	30	-0.23	0.41	144	0.899	0.59	317	0.835
ELOB	-5.79	30	-0.21	0.418	145	0.899	0.582	316	0.835
T	-5.74	30	-0.2	0.419	146	0.899	0.581	315	0.835
GADD45A	-5.71	30	-0.2	0.42	147	0.899	0.58	314	0.835
NUP133	-5.7	30	-0.2	0.42	148	0.899	0.58	313	0.835
CDC25A	-5.63	30	-0.2	0.422	149	0.899	0.578	312	0.835
CDC25C	-5.62	30	-0.2	0.422	150	0.899	0.578	311	0.835
GTF2H3	-5.54	30	-0.19	0.424	151	0.899	0.576	310	0.835
FANCG	-5.47	30	-0.19	0.426	152	0.899	0.574	309	0.835
RB1	-5.41	30	-0.18	0.427	153	0.899	0.573	308	0.835
APOBEC1	-5.36	30	-0.18	0.428	154	0.899	0.572	307	0.835
ATR	-5.34	30	-0.18	0.429	155	0.899	0.571	306	0.835
RAD54B	-5.33	30	-0.18	0.429	156	0.899	0.571	305	0.835
LMNA	-5.28	30	-0.18	0.43	157	0.899	0.57	304	0.835
ALDH4A1	-5.28	30	-0.18	0.43	158	0.899	0.57	303	0.835
PARP2	-5.22	30	-0.17	0.432	159	0.899	0.568	302	0.835
DNLZ	-5.21	30	-0.17	0.432	160	0.899	0.568	301	0.835
PAXIP1	-5.1	30	-0.16	0.435	161	0.899	0.565	300	0.835
XPC	-5.04	30	-0.16	0.436	162	0.899	0.564	299	0.835
BCAS2	-4.95	30	-0.16	0.438	163	0.899	0.562	298	0.835
RRM1	-4.92	30	-0.15	0.439	164	0.899	0.561	297	0.835
SETMAR	-4.78	30	-0.14	0.442	165	0.899	0.558	296	0.835
BARD1	-4.78	30	-0.14	0.442	166	0.899	0.558	295	0.835
MSH6	-4.71	30	-0.14	0.444	167	0.899	0.556	294	0.835
CCT7	-4.6	30	-0.13	0.447	168	0.899	0.553	293	0.835
DMC1	-4.5	30	-0.13	0.449	169	0.899	0.551	292	0.835
SPO11	-4.49	30	-0.13	0.45	170	0.899	0.55	291	0.835
NSMCE1	-4.46	30	-0.12	0.45	171	0.899	0.55	290	0.835
POLE2	-4.45	30	-0.12	0.451	172	0.899	0.549	289	0.835
SHPRH	-4.45	30	-0.12	0.451	173	0.899	0.549	288	0.835
POLH	-4.4	30	-0.12	0.452	174	0.899	0.548	287	0.835
GPX6	-4.28	30	-0.11	0.455	175	0.899	0.545	286	0.835
PPP4R4	-4.27	30	-0.11	0.455	176	0.899	0.545	285	0.835
FANCE	-4.22	30	-0.11	0.456	177	0.899	0.544	284	0.835
GTF2H5	-3.71	24	-0.1	0.458	178	0.899	0.542	283	0.835
ALDH1A2	-3.79	30	-0.08	0.467	179	0.899	0.533	282	0.835
MNAT1	-3.77	30	-0.08	0.468	180	0.899	0.532	281	0.835
TONSL	-3.73	30	-0.08	0.468	181	0.899	0.532	280	0.835
RNF168	-3.7	30	-0.08	0.469	182	0.899	0.531	279	0.835
RECQL4	-3.61	30	-0.07	0.471	183	0.899	0.529	278	0.835
ALDH1A1	-3.57	30	-0.07	0.472	184	0.899	0.528	277	0.835
OGG1	-3.56	30	-0.07	0.473	185	0.899	0.527	276	0.835
ATRX	-3.45	30	-0.06	0.476	186	0.899	0.524	275	0.835
ELOA	-3.44	30	-0.06	0.476	187	0.899	0.524	274	0.835
MRPL40	-3.41	30	-0.06	0.476	188	0.899	0.524	273	0.835
MMS19	-3.41	30	-0.06	0.476	189	0.899	0.524	272	0.835
RFC2	-3.39	30	-0.06	0.477	190	0.899	0.523	271	0.835
INTS3	-3.38	30	-0.06	0.477	191	0.899	0.523	270	0.835
GABRA1	-3.38	30	-0.06	0.477	192	0.899	0.523	269	0.835
KITLG	-3.37	30	-0.06	0.478	193	0.899	0.522	268	0.835
PAXX	-3.29	30	-0.05	0.48	194	0.899	0.52	267	0.835
C1orf112	-3.22	30	-0.05	0.481	195	0.899	0.519	266	0.835
UNG	-3.22	30	-0.05	0.481	196	0.899	0.519	265	0.835
HMGB2	-3.17	30	-0.04	0.482	197	0.899	0.518	264	0.835
NTHL1	-3.16	30	-0.04	0.483	198	0.899	0.517	263	0.835
ALDH3B2	-3.15	30	-0.04	0.483	199	0.899	0.517	262	0.835
FAM35A	-3.1	30	-0.04	0.484	200	0.899	0.516	261	0.835
MCM2	-3.06	30	-0.04	0.485	201	0.899	0.515	260	0.835
NONO	-3	30	-0.03	0.487	202	0.899	0.513	259	0.835
RPA3	-2.84	30	-0.02	0.491	203	0.899	0.509	258	0.835
GADD45G	-2.73	30	-0.02	0.493	204	0.899	0.507	257	0.835
FANCI	-2.62	30	-0.01	0.496	205	0.899	0.504	256	0.835
RFC4	-2.57	30	-0.01	0.497	206	0.899	0.503	255	0.835
MEP1A	-2.34	30	0.01	0.503	207	0.899	0.497	254	0.835
MAD2L2	-2.33	30	0.01	0.503	208	0.899	0.497	253	0.835
ALKBH1	-2.32	30	0.01	0.504	209	0.899	0.496	252	0.835
ERCC1	-2.27	30	0.01	0.505	210	0.899	0.495	251	0.835
CDK1	-2.26	30	0.01	0.505	211	0.899	0.495	250	0.835
APLF	-2.12	30	0.02	0.509	212	0.899	0.491	249	0.835
SMARCC1	-2.04	30	0.03	0.511	213	0.899	0.489	248	0.835
NUDT16L1	-1.85	30	0.04	0.515	214	0.899	0.485	247	0.835
SUV39H1	-1.8	30	0.04	0.517	215	0.899	0.483	246	0.835
SMC5	-1.67	30	0.05	0.52	216	0.899	0.48	245	0.835
RRM2	-1.67	30	0.05	0.52	217	0.899	0.48	244	0.835
SERPINA7	-1.59	30	0.05	0.522	218	0.899	0.478	243	0.835
CDKN1A	-1.5	30	0.06	0.524	219	0.899	0.476	242	0.835
POLA1	-1.44	30	0.06	0.526	220	0.899	0.474	241	0.835
RPA4	-1.4	30	0.07	0.526	221	0.899	0.474	240	0.835
ALDH1L2	-1.39	30	0.07	0.527	222	0.899	0.473	239	0.835
POLD1	-1.39	30	0.07	0.527	223	0.899	0.473	238	0.835
CLK2	-1.36	30	0.07	0.527	224	0.899	0.473	237	0.835
GFRAL	-1.33	30	0.07	0.528	225	0.899	0.472	236	0.835
ALDH7A1	-1.07	30	0.09	0.535	226	0.899	0.465	235	0.835
MGMT	-1	30	0.09	0.536	227	0.899	0.464	234	0.835
CETN2	-0.91	30	0.1	0.539	228	0.899	0.461	233	0.835
NUDT1	-0.9	30	0.1	0.539	229	0.899	0.461	232	0.835
NDST4	-0.8	30	0.1	0.541	230	0.899	0.459	231	0.835
PRSS37	-0.73	30	0.11	0.543	231	0.899	0.457	230	0.835
CHEK2	-0.73	30	0.11	0.543	232	0.899	0.457	229	0.835
POLR2B	-0.72	30	0.11	0.543	233	0.899	0.457	228	0.835
CPSF3	-0.71	30	0.11	0.544	234	0.899	0.456	227	0.835
ESR1	-0.65	30	0.11	0.545	235	0.899	0.455	226	0.835
BACH1	-0.48	30	0.12	0.549	236	0.899	0.451	225	0.835
NSMCE3	-0.35	30	0.13	0.552	237	0.899	0.448	224	0.835
ALDH1B1	-0.26	30	0.14	0.555	238	0.899	0.445	223	0.835
RBBP8	-0.02	30	0.15	0.561	239	0.899	0.439	222	0.835
SFR1	0.01	15	0.15	0.562	240	0.899	0.438	221	0.835
MLH1	0.09	30	0.16	0.563	241	0.899	0.437	220	0.835
RNF138	0.11	30	0.16	0.564	242	0.899	0.436	219	0.835
DPAGT1	0.14	30	0.16	0.564	243	0.899	0.436	218	0.835
RAD9B	0.18	30	0.16	0.565	244	0.899	0.435	217	0.835
YWHAE	0.19	18	0.17	0.567	245	0.899	0.433	216	0.835
TRPC7	0.25	30	0.17	0.567	246	0.899	0.433	215	0.835
SFPQ	0.37	30	0.18	0.57	247	0.899	0.43	214	0.835
ASCC2	0.37	30	0.18	0.57	248	0.899	0.43	213	0.835
CCT2	0.43	30	0.18	0.572	249	0.899	0.428	212	0.835
RIF1	0.53	30	0.19	0.574	250	0.899	0.426	211	0.835
TKTL2	0.61	30	0.19	0.576	251	0.899	0.424	210	0.835
WDR3	0.62	30	0.19	0.576	252	0.899	0.424	209	0.835
APTX	0.83	30	0.21	0.582	253	0.899	0.418	208	0.835
XPA	0.86	30	0.21	0.582	254	0.899	0.418	207	0.835
RAD51D	0.9	30	0.21	0.583	255	0.899	0.417	206	0.835
KIF11	0.91	30	0.21	0.583	256	0.899	0.417	205	0.835
APEX1	0.97	30	0.21	0.585	257	0.899	0.415	204	0.835
CLRN1	1.04	30	0.22	0.587	258	0.899	0.413	203	0.835
POLR2E	1.15	30	0.23	0.589	259	0.899	0.411	202	0.835
POLQ	1.18	30	0.23	0.59	260	0.899	0.41	201	0.835
RNASEH2B	1.18	30	0.23	0.59	261	0.899	0.41	200	0.835
ABRAXAS1	1.22	30	0.23	0.591	262	0.899	0.409	199	0.835
YWHAB	1.24	30	0.23	0.591	263	0.899	0.409	198	0.835
NELFB	1.28	30	0.23	0.592	264	0.899	0.408	197	0.835
POLN	1.29	30	0.23	0.593	265	0.899	0.407	196	0.835
TRIM28	1.32	30	0.24	0.593	266	0.899	0.407	195	0.835
UBQLN3	1.34	30	0.24	0.594	267	0.899	0.406	194	0.835
CUL4A	1.35	30	0.24	0.594	268	0.899	0.406	193	0.835
ALDH6A1	1.37	30	0.24	0.594	269	0.899	0.406	192	0.835
PARP4	1.38	30	0.24	0.595	270	0.899	0.405	191	0.835
EID3	1.51	30	0.25	0.598	271	0.899	0.402	190	0.835
XRCC3	1.61	30	0.25	0.6	272	0.899	0.4	189	0.835
PLRG1	1.64	30	0.26	0.601	273	0.899	0.399	188	0.835
RNASEL	1.64	30	0.26	0.601	274	0.899	0.399	187	0.835
TP53BP1	1.68	30	0.26	0.602	275	0.899	0.398	186	0.835
FAAP20	1.76	30	0.26	0.604	276	0.899	0.396	185	0.835
XRCC6	1.82	30	0.27	0.605	277	0.899	0.395	184	0.835
MPG	1.85	30	0.27	0.606	278	0.899	0.394	183	0.835
RNF17	1.88	30	0.27	0.607	279	0.899	0.393	182	0.835
HES1	1.92	30	0.27	0.608	280	0.899	0.392	181	0.835
PMS2	2	30	0.28	0.61	281	0.899	0.39	180	0.835
XRCC2	2.01	30	0.28	0.61	282	0.899	0.39	179	0.835
MSH3	2.01	30	0.28	0.61	283	0.899	0.39	178	0.835
MSH2	2.09	30	0.28	0.612	284	0.899	0.388	177	0.835
NSMCE4A	2.12	30	0.29	0.612	285	0.899	0.388	176	0.835
TUBGCP2	2.12	30	0.29	0.613	286	0.899	0.387	175	0.835
PLK1	2.16	30	0.29	0.614	287	0.899	0.386	174	0.835
UVSSA	2.18	30	0.29	0.614	288	0.899	0.386	173	0.835
PALB2	2.36	30	0.3	0.618	289	0.899	0.382	172	0.835
RAD52	2.37	30	0.3	0.619	290	0.899	0.381	171	0.835
FMR1NB	2.38	30	0.3	0.619	291	0.899	0.381	170	0.835
EZH2	2.39	30	0.3	0.619	292	0.899	0.381	169	0.835
RECQL	2.44	30	0.31	0.62	293	0.899	0.38	168	0.835
PDILT	2.45	30	0.31	0.621	294	0.899	0.379	167	0.835
DDX20	2.51	30	0.31	0.622	295	0.899	0.378	166	0.835
CDC16	2.52	30	0.31	0.622	296	0.899	0.378	165	0.835
TREX2	2.57	30	0.31	0.623	297	0.899	0.377	164	0.835
ERCC8	2.59	30	0.32	0.624	298	0.899	0.376	163	0.835
INO80	2.69	30	0.32	0.626	299	0.899	0.374	162	0.835
DUT	2.43	24	0.32	0.627	300	0.899	0.373	161	0.835
RECQL5	2.73	30	0.32	0.627	301	0.899	0.373	160	0.835
NUDT18	2.73	30	0.32	0.627	302	0.899	0.373	159	0.835
XAB2	2.83	30	0.33	0.629	303	0.899	0.371	158	0.835
EME1	2.89	30	0.33	0.631	304	0.899	0.369	157	0.835
TCEA1	2.98	30	0.34	0.633	305	0.899	0.367	156	0.835
ALDH1A3	3.11	30	0.35	0.636	306	0.899	0.364	155	0.835
VCP	3.13	30	0.35	0.637	307	0.899	0.363	154	0.835
RAD54L	3.17	30	0.35	0.637	308	0.899	0.363	153	0.835
MORF4L1	3.05	27	0.35	0.638	309	0.899	0.362	152	0.835
TDP2	3.35	30	0.36	0.642	310	0.899	0.358	151	0.835
EEPD1	3.47	30	0.37	0.644	311	0.899	0.356	150	0.835
YWHAG	3.48	30	0.37	0.645	312	0.899	0.355	149	0.835
ALDH5A1	3.53	30	0.37	0.646	313	0.899	0.354	148	0.835
CKAP5	3.57	30	0.38	0.647	314	0.899	0.353	147	0.835
ALDH2	3.68	30	0.38	0.649	315	0.899	0.351	146	0.835
CDK2	3.72	30	0.39	0.65	316	0.899	0.35	145	0.835
NEIL1	3.9	30	0.4	0.654	317	0.899	0.346	144	0.835
POLE	3.92	30	0.4	0.655	318	0.899	0.345	143	0.835
ZSWIM7	4.12	30	0.41	0.659	319	0.899	0.341	142	0.835
BRCA2	4.25	30	0.42	0.662	320	0.899	0.338	141	0.835
HERC2	4.38	30	0.43	0.665	321	0.899	0.335	140	0.835
PER1	4.4	30	0.43	0.666	322	0.899	0.334	139	0.835
RNF4	4.44	30	0.43	0.667	323	0.899	0.333	138	0.835
BPIFB6	4.54	30	0.44	0.669	324	0.899	0.331	137	0.835
RNF212	4.65	30	0.44	0.671	325	0.899	0.329	136	0.835
HELB	4.71	30	0.45	0.673	326	0.899	0.327	135	0.835
PNKP	4.76	30	0.45	0.674	327	0.899	0.326	134	0.835
UBE2B	4.77	30	0.45	0.674	328	0.899	0.326	133	0.835
ASCC3	4.81	30	0.45	0.675	329	0.899	0.325	132	0.835
APEX2	4.84	30	0.46	0.676	330	0.899	0.324	131	0.835
RAD23A	4.85	30	0.46	0.676	331	0.899	0.324	130	0.835
RRM2B	4.92	30	0.46	0.677	332	0.899	0.323	129	0.835
SEM1	3.12	12	0.46	0.678	333	0.899	0.322	128	0.835
CDK6	4.99	30	0.46	0.679	334	0.899	0.321	127	0.835
RAX	5.01	30	0.47	0.679	335	0.899	0.321	126	0.835
NUDT15	5.04	30	0.47	0.68	336	0.899	0.32	125	0.835
POLR1C	5.15	30	0.47	0.683	337	0.899	0.317	124	0.835
ERI3	5.23	30	0.48	0.684	338	0.899	0.316	123	0.835
TOP2B	5.29	30	0.48	0.686	339	0.899	0.314	122	0.835
IDH1	5.29	30	0.48	0.686	340	0.899	0.314	121	0.835
CDH4	5.38	30	0.49	0.688	341	0.899	0.312	120	0.835
RAD51B	5.44	30	0.49	0.689	342	0.899	0.311	119	0.835
RXFP3	5.5	30	0.5	0.69	343	0.899	0.31	118	0.835
MDC1	5.52	30	0.5	0.691	344	0.899	0.309	117	0.835
ERCC3	5.89	30	0.52	0.699	345	0.899	0.301	116	0.835
PHB2	6.08	30	0.53	0.703	346	0.899	0.297	115	0.835
KMT2D	6.11	30	0.53	0.704	347	0.899	0.296	114	0.835
MRE11	6.19	30	0.54	0.705	348	0.899	0.295	113	0.835
EIF6	6.2	30	0.54	0.706	349	0.899	0.294	112	0.835
FAN1	6.2	30	0.54	0.706	350	0.899	0.294	111	0.835
PARP3	6.25	30	0.54	0.707	351	0.899	0.293	110	0.835
ALDH3A2	6.28	30	0.55	0.707	352	0.899	0.293	109	0.835
DDB2	6.34	30	0.55	0.709	353	0.899	0.291	108	0.835
GTF2H4	6.4	30	0.55	0.71	354	0.899	0.29	107	0.835
ALDH1L1	6.52	30	0.56	0.712	355	0.899	0.288	106	0.835
POLK	6.56	30	0.56	0.713	356	0.899	0.287	105	0.835
RAD51	6.57	30	0.56	0.713	357	0.899	0.287	104	0.835
RCC1	6.57	30	0.56	0.714	358	0.899	0.286	103	0.835
C3orf30	6.62	30	0.57	0.715	359	0.899	0.285	102	0.835
GTF2H1	6.66	30	0.57	0.715	360	0.899	0.285	101	0.835
RS1	6.83	30	0.58	0.719	361	0.899	0.281	100	0.835
SMARCAL1	6.99	30	0.59	0.722	362	0.899	0.278	99	0.835
WEE1	7.15	30	0.6	0.726	363	0.899	0.274	98	0.835
MUS81	7.37	30	0.61	0.73	364	0.899	0.27	97	0.835
EXO5	7.37	30	0.61	0.73	365	0.899	0.27	96	0.835
ERCC5	6.18	21	0.61	0.731	366	0.899	0.269	95	0.835
MYC	7.46	30	0.62	0.732	367	0.899	0.268	94	0.835
MSH4	7.47	30	0.62	0.732	368	0.899	0.268	93	0.835
MUTYH	7.51	30	0.62	0.733	369	0.899	0.267	92	0.835
KAT5	7.53	30	0.62	0.733	370	0.899	0.267	91	0.835
DDX11	7.56	30	0.63	0.734	371	0.899	0.266	90	0.835
RNMT	7.68	30	0.63	0.737	372	0.899	0.263	89	0.835
EXD2	7.75	30	0.64	0.738	373	0.899	0.262	88	0.835
POLD2	7.79	30	0.64	0.739	374	0.899	0.261	87	0.835
C7orf49	7.91	30	0.65	0.741	375	0.899	0.259	86	0.835
LAS1L	8.04	30	0.66	0.744	376	0.899	0.256	85	0.835
RD3	8.06	30	0.66	0.744	377	0.899	0.256	84	0.835
POLD4	5.75	15	0.66	0.746	378	0.899	0.254	83	0.835
POLM	8.44	30	0.68	0.752	379	0.899	0.248	82	0.835
OPN5	8.5	30	0.68	0.753	380	0.899	0.247	81	0.835
NFATC2IP	8.51	30	0.68	0.753	381	0.899	0.247	80	0.835
TDG	8.79	30	0.7	0.759	382	0.899	0.241	79	0.835
KCNK10	8.87	30	0.71	0.76	383	0.899	0.24	78	0.835
ECD	8.93	30	0.71	0.761	384	0.899	0.239	77	0.835
PLK3	8.97	30	0.71	0.762	385	0.899	0.238	76	0.835
CUL3	9.02	30	0.72	0.763	386	0.899	0.237	75	0.835
GPR50	9.05	30	0.72	0.764	387	0.899	0.236	74	0.835
NHEJ1	9.16	30	0.73	0.766	388	0.899	0.234	73	0.835
TDP1	9.18	30	0.73	0.766	389	0.899	0.234	72	0.835
GTF2B	9.33	30	0.74	0.769	390	0.899	0.231	71	0.835
ERCC2	9.61	30	0.75	0.774	391	0.899	0.226	70	0.835
KRAS	9.68	30	0.76	0.776	392	0.899	0.224	69	0.835
GSX2	9.74	30	0.76	0.777	393	0.899	0.223	68	0.835
TRIP4	9.75	30	0.76	0.777	394	0.899	0.223	67	0.835
NABP2	9.82	30	0.77	0.778	395	0.899	0.222	66	0.835
SMUG1	9.85	30	0.77	0.779	396	0.899	0.221	65	0.835
DDB1	9.93	30	0.77	0.78	397	0.899	0.22	64	0.835
BABAM1	9.96	30	0.78	0.781	398	0.899	0.219	63	0.835
NEIL2	10.04	30	0.78	0.782	399	0.899	0.218	62	0.835
CDX4	10.27	30	0.79	0.787	400	0.899	0.213	61	0.835
ALKBH2	10.43	30	0.8	0.789	401	0.899	0.211	60	0.835
SPC24	10.48	30	0.81	0.79	402	0.899	0.21	59	0.835
SPEM1	10.55	30	0.81	0.792	403	0.899	0.208	58	0.835
ALDH3A1	10.58	30	0.81	0.792	404	0.899	0.208	57	0.835
XRCC1	10.72	30	0.82	0.795	405	0.899	0.205	56	0.835
CHAF1A	10.9	30	0.83	0.798	406	0.899	0.202	55	0.835
CHEK1	10.92	30	0.84	0.798	407	0.899	0.202	54	0.835
MPLKIP	11.05	30	0.84	0.8	408	0.899	0.2	53	0.835
CDK4	11.23	30	0.85	0.804	409	0.899	0.196	52	0.835
HTR5A	11.23	30	0.85	0.804	410	0.899	0.196	51	0.835
ALDH3B1	11.23	30	0.85	0.804	411	0.899	0.196	50	0.835
PSMG3	11.52	30	0.87	0.809	412	0.901	0.191	49	0.835
TIPIN	11.53	30	0.87	0.809	413	0.901	0.191	48	0.835
EME2	11.87	30	0.89	0.814	414	0.903	0.186	47	0.835
POLD3	11.9	30	0.9	0.815	415	0.903	0.185	46	0.835
PIN1	12.12	30	0.91	0.819	416	0.905	0.181	45	0.835
CCNH	12.32	30	0.92	0.822	417	0.907	0.178	44	0.835
FBXW7	12.45	30	0.93	0.824	418	0.907	0.176	43	0.835
PSMA7	12.68	30	0.95	0.828	419	0.908	0.172	42	0.835
PNPLA5	12.78	30	0.95	0.829	420	0.908	0.171	41	0.835
TREX1	12.98	30	0.96	0.832	421	0.91	0.168	40	0.835
DHX8	13.37	30	0.99	0.838	422	0.912	0.162	39	0.835
SWSAP1	13.53	30	1	0.841	423	0.912	0.159	38	0.835
POLG	13.84	30	1.02	0.846	424	0.912	0.154	37	0.835
RABGGTB	13.87	30	1.02	0.846	425	0.912	0.154	36	0.835
UBE2I	14.08	30	1.03	0.849	426	0.912	0.151	35	0.835
TELO2	14.32	30	1.05	0.852	427	0.912	0.148	34	0.835
TOP2A	14.36	30	1.05	0.853	428	0.912	0.147	33	0.835
RPS5	12.86	24	1.05	0.853	429	0.912	0.147	32	0.835
C8B	14.93	30	1.09	0.861	430	0.912	0.139	31	0.835
TOP3A	15.1	30	1.1	0.863	431	0.912	0.137	30	0.835
ALDH16A1	15.13	30	1.1	0.864	432	0.912	0.136	29	0.835
SLX4	15.3	30	1.11	0.866	433	0.912	0.134	28	0.835
H2AFZ	10.82	15	1.11	0.866	434	0.912	0.134	27	0.835
PRPF19	15.35	30	1.11	0.867	435	0.912	0.133	26	0.835
DDOST	15.38	30	1.11	0.867	436	0.912	0.133	25	0.835
SMARCAD1	15.4	30	1.11	0.867	437	0.912	0.133	24	0.835
FAM96B	15.48	30	1.12	0.869	438	0.912	0.131	23	0.835
KLK12	15.84	30	1.14	0.873	439	0.912	0.127	22	0.835
RNF169	15.97	30	1.15	0.875	440	0.912	0.125	21	0.835
BUD31	15.98	30	1.15	0.875	441	0.912	0.125	20	0.835
SF3B3	16.09	30	1.16	0.876	442	0.912	0.124	19	0.835
FGF4	17.04	30	1.22	0.888	443	0.915	0.112	18	0.835
TP53	17.09	30	1.22	0.889	444	0.915	0.111	17	0.835
XRCC4	13.3	18	1.22	0.89	445	0.915	0.11	16	0.835
PARP1	17.39	30	1.24	0.892	446	0.915	0.108	15	0.835
DSPP	17.65	30	1.26	0.895	447	0.915	0.105	14	0.835
CDC5L	17.75	30	1.26	0.896	448	0.915	0.104	13	0.835
UTS2R	17.75	30	1.26	0.896	449	0.915	0.104	12	0.835
DHX15	17.82	30	1.27	0.897	450	0.915	0.103	11	0.835
SMARCA4	17.86	30	1.27	0.898	451	0.915	0.102	10	0.835
ATRIP	18.46	30	1.31	0.904	452	0.92	0.0958	9	0.835
RPL8	18.91	30	1.33	0.909	453	0.921	0.0911	8	0.835
RAD9A	18.96	30	1.34	0.909	454	0.921	0.0906	7	0.835
AARS	19.4	30	1.36	0.914	455	0.924	0.0863	6	0.835
RBX1	20.99	30	1.46	0.928	456	0.936	0.0717	5	0.835
NOL6	22.27	30	1.54	0.939	457	0.944	0.0614	4	0.835
IMP3	22.46	30	1.55	0.94	458	0.944	0.06	3	0.835
LIG3	23.64	30	1.63	0.948	459	0.949	0.0517	2	0.835
SRSF2	16.79	15	1.64	0.949	460	0.949	0.051	1	0.835
