# Supplementary material for: DePARylation is critical for S phase progression and cell survival
Source: eLife. 2024 Apr 5;12:RP89303. doi: 10.7554/eLife.89303 (PMC10997334; doi:10.7554/eLife.89303)
Supplement: Figure 5—source data 1. [file elife-89303-fig5-data1.xlsx]

## Sheet: Sheet1
GENE	sumZ	numObs	normZ	pval_synth	rank_synth	fdr_synth	pval_supp	rank_supp	fdr_supp
RPL14	-28.09	8	-8.95	1.76e-19	1	3.16e-15	1	17929	1
RPS11	-22.1	8	-7.03	1.06e-12	2	9.48e-09	1	17928	1
PSMD2	-19.67	8	-6.24	2.15e-10	3	1.26e-06	1	17927	1
PARP1	-19.47	8	-6.18	3.21e-10	4	1.26e-06	1	17926	1
RPS5	-19.43	8	-6.17	3.5e-10	5	1.26e-06	1	17925	1
NUP205	-19.27	8	-6.11	4.83e-10	6	1.44e-06	1	17924	1
PSMC2	-19.15	8	-6.08	6.19e-10	7	1.44e-06	1	17923	1
POLR1B	-19.13	8	-6.07	6.43e-10	8	1.44e-06	1	17922	1
WDR43	-18.41	8	-5.84	2.62e-09	9	5.22e-06	1	17921	1
RPS16	-17.85	8	-5.66	7.59e-09	10	1.36e-05	1	17920	1
PSMA4	-17.35	8	-5.5	1.92e-08	11	3.14e-05	1	17919	1
NUP93	-17.15	8	-5.43	2.74e-08	12	4.1e-05	1	17918	1
RPL8	-16.91	8	-5.36	4.22e-08	13	5.82e-05	1	17917	1
RPL13A	-11.66	4	-5.22	8.8e-08	14	0.000113	1	17916	1
IMP3	-16.27	8	-5.15	1.3e-07	15	0.000155	1	17915	1
WBSCR22	-16.09	8	-5.09	1.78e-07	16	0.000199	1	17914	1
XPO1	-14.25	7	-4.82	7.26e-07	17	0.000747	1	17913	1
FBL	-15.21	8	-4.81	7.5e-07	18	0.000747	1	17912	1
RAE1	-14.93	8	-4.72	1.17e-06	19	0.00111	1	17911	1
RPL11	-14.84	8	-4.69	1.35e-06	20	0.00121	1	17910	1
CALM2	-7.33	2	-4.63	1.82e-06	21	0.00155	1	17909	1
RPL10A	-12.45	6	-4.54	2.8e-06	22	0.00218	1	17908	1
CDC123	-14.35	8	-4.53	2.9e-06	23	0.00218	1	17907	1
UBA52	-12.42	6	-4.53	2.92e-06	24	0.00218	1	17906	1
NUP98	-14.32	8	-4.52	3.04e-06	25	0.00218	1	17905	1
PSMB4	-14.29	8	-4.51	3.2e-06	26	0.00221	1	17904	1
RPL18	-14.21	8	-4.49	3.61e-06	27	0.0024	1	17903	1
HEATR1	-14.17	8	-4.48	3.8e-06	28	0.00243	1	17902	1
RPL27A	-14.13	8	-4.46	4.02e-06	29	0.00246	1	17901	1
WDR46	-14.1	8	-4.45	4.21e-06	30	0.00246	1	17900	1
EIF2B5	-14.1	8	-4.45	4.25e-06	31	0.00246	1	17899	1
CCT6A	-13.94	8	-4.4	5.39e-06	32	0.00302	1	17898	1
RPL18A	-11.98	6	-4.37	6.33e-06	33	0.00344	1	17897	1
RPS15A	-9.64	4	-4.3	8.42e-06	34	0.00444	1	17896	1
NVL	-13.58	8	-4.29	9.04e-06	35	0.00463	1	17895	1
PSMB7	-13.42	8	-4.23	1.15e-05	36	0.00561	1	17894	1
CCT4	-13.41	8	-4.23	1.16e-05	37	0.00561	1	17893	1
UPF2	-13.33	8	-4.21	1.3e-05	38	0.00613	1	17892	1
LTV1	-13.26	8	-4.18	1.45e-05	39	0.00665	1	17891	1
WDR3	-13.12	8	-4.14	1.74e-05	40	0.0078	1	17890	1
PSMC4	-13.02	8	-4.11	2e-05	41	0.00859	1	17889	1
VARS	-13.02	8	-4.11	2.01e-05	42	0.00859	1	17888	1
CCT3	-13	8	-4.1	2.08e-05	43	0.00867	1	17887	1
UTP15	-12.95	8	-4.08	2.21e-05	44	0.00902	1	17886	1
PSMB2	-12.87	8	-4.06	2.48e-05	45	0.00988	1	17885	1
RPS2	-12.83	8	-4.05	2.6e-05	46	0.0102	1	17884	1
RRN3	-12.82	8	-4.04	2.66e-05	47	0.0102	1	17883	1
EXOSC2	-12.79	8	-4.03	2.76e-05	48	0.0103	1	17882	1
PSMA5	-12.76	8	-4.02	2.9e-05	49	0.0106	1	17881	1
GARS	-12.61	8	-3.97	3.54e-05	50	0.0127	1	17880	1
UCN2	-12.46	8	-3.92	4.35e-05	51	0.0153	1	17879	1
PSMA6	-12.37	8	-3.9	4.88e-05	52	0.0165	1	17878	1
PPOX	-10.71	6	-3.9	4.88e-05	53	0.0165	1	17877	1
RRP7A	-12.36	8	-3.89	4.97e-05	54	0.0165	1	17876	1
UTP20	-12.33	8	-3.89	5.11e-05	55	0.0167	1	17875	1
RPL30	-8.53	4	-3.8	7.28e-05	56	0.0233	1	17874	1
NUP155	-12.04	8	-3.79	7.49e-05	57	0.0236	1	17873	1
CDCA8	-11.99	8	-3.77	8.04e-05	58	0.0248	1	17872	1
PDCD11	-11.87	8	-3.73	9.39e-05	59	0.0285	1	17871	1
RPSA	-11.82	8	-3.72	9.93e-05	60	0.0297	1	17870	1
SMG1	-11.76	8	-3.7	0.000108	61	0.0317	1	17869	1
NOP9	-11.68	8	-3.67	0.00012	62	0.0346	1	17868	1
NOP16	-11.65	8	-3.67	0.000123	63	0.0349	1	17867	1
HSPA9	-11.63	8	-3.66	0.000127	64	0.0355	1	17866	1
ZDHHC18	-11.62	8	-3.65	0.000129	65	0.0355	1	17865	1
GABPB2	-11.6	8	-3.65	0.000131	66	0.0355	1	17864	1
RPLP0	-11.59	8	-3.65	0.000133	67	0.0355	1	17863	1
DCAF13	-11.47	8	-3.61	0.000154	68	0.0406	1	17862	1
RRS1	-11.38	8	-3.58	0.000174	69	0.0451	1	17861	1
SKIV2L2	-11.33	8	-3.56	0.000185	70	0.0472	1	17860	1
AKIRIN1	-11.32	8	-3.56	0.000187	71	0.0472	1	17859	1
PRELID1	-11.21	8	-3.52	0.000213	72	0.053	1	17858	1
LAX1	-11.19	8	-3.52	0.000218	73	0.0537	1	17857	1
THOC2	-11.15	8	-3.5	0.000229	74	0.0548	1	17856	1
EIF6	-11.15	8	-3.5	0.000229	75	0.0548	1	17855	1
PSMC1	-11.14	8	-3.5	0.000232	76	0.0548	1	17854	1
SEC13	-11.13	8	-3.5	0.000236	77	0.0549	1	17853	1
ABT1	-11.1	8	-3.49	0.000243	78	0.0558	1	17852	1
RPL5	-7.82	4	-3.48	0.000254	79	0.0577	1	17851	1
C3orf17	-11.02	8	-3.46	0.000267	80	0.0597	1	17850	1
RXFP4	-10.99	8	-3.45	0.000278	81	0.0616	1	17849	1
MPHOSPH10	-10.94	8	-3.44	0.000294	82	0.0642	1	17848	1
WDR74	-10.89	8	-3.42	0.000312	83	0.0674	1	17847	1
DDX52	-10.86	8	-3.41	0.000322	84	0.0687	1	17846	1
TADA3	-10.81	8	-3.39	0.000344	85	0.0726	1	17845	1
POP7	-10.78	8	-3.38	0.000357	86	0.0744	1	17844	1
LHPP	-10.75	8	-3.38	0.000366	87	0.0754	1	17843	1
POP5	-10.65	8	-3.34	0.000412	88	0.0838	1	17842	1
ARF1	-10.64	8	-3.34	0.000417	89	0.0839	1	17841	1
PSMC6	-10.62	8	-3.33	0.000428	90	0.085	1	17840	1
ESF1	-10.61	8	-3.33	0.000431	91	0.085	1	17839	1
RPL32	-5.28	2	-3.32	0.000457	92	0.0892	1	17838	1
NOC4L	-10.51	8	-3.3	0.000486	93	0.0925	1	17837	1
PHB2	-10.51	8	-3.3	0.000488	94	0.0925	1	17836	1
RPS3	-10.5	8	-3.3	0.000492	95	0.0925	1	17835	1
RPL23	-10.49	8	-3.29	0.000495	96	0.0925	1	17834	1
ATP5A1	-10.48	8	-3.29	0.000504	97	0.0931	0.999	17833	1
C12orf45	-10.43	8	-3.27	0.000532	98	0.0973	0.999	17832	1
RAX2	-10.37	8	-3.25	0.000568	99	0.103	0.999	17831	1
PSMB5	-10.35	8	-3.25	0.00058	100	0.104	0.999	17830	1
GRPEL1	-10.33	8	-3.24	0.000593	101	0.105	0.999	17829	1
TAF12	-10.29	8	-3.23	0.000626	102	0.11	0.999	17828	1
RPS18	-7.24	4	-3.21	0.000663	103	0.115	0.999	17827	1
SMG7	-10.21	8	-3.2	0.000684	104	0.117	0.999	17826	1
BSN	-10.2	8	-3.2	0.000688	105	0.117	0.999	17825	1
EXOSC7	-10.12	8	-3.17	0.000753	106	0.127	0.999	17824	1
GBP1	-10.1	8	-3.17	0.000774	107	0.13	0.999	17823	1
RPS14	-10.07	8	-3.16	0.000796	108	0.132	0.999	17822	1
RPS8	-8.7	6	-3.15	0.000815	109	0.133	0.999	17821	1
FARS2	-10.04	8	-3.15	0.000821	110	0.133	0.999	17820	1
C18orf21	-10.04	8	-3.15	0.000824	111	0.133	0.999	17819	1
RPL15	-4.99	2	-3.13	0.000874	112	0.14	0.999	17818	1
TACC3	-9.97	8	-3.13	0.000886	113	0.141	0.999	17817	1
EIF4E	-9.93	8	-3.11	0.000924	114	0.145	0.999	17816	1
MST1	-9.91	8	-3.1	0.000954	115	0.148	0.999	17815	1
PYCR2	-9.9	8	-3.1	0.000956	116	0.148	0.999	17814	1
DMRTB1	-9.89	8	-3.1	0.000966	117	0.148	0.999	17813	1
FBXW12	-9.88	8	-3.1	0.000978	118	0.149	0.999	17812	1
HAS1	-9.87	8	-3.09	0.000986	119	0.149	0.999	17811	1
RPS19BP1	-9.82	8	-3.08	0.00105	120	0.157	0.999	17810	1
METTL14	-9.81	8	-3.07	0.00106	121	0.157	0.999	17809	1
RAD54L	-9.8	8	-3.07	0.00107	122	0.157	0.999	17808	1
NOP56	-9.75	8	-3.06	0.00112	123	0.161	0.999	17807	1
EIF5B	-9.75	8	-3.05	0.00113	124	0.161	0.999	17806	1
EIF3G	-9.74	8	-3.05	0.00114	125	0.161	0.999	17805	1
VASH2	-9.74	8	-3.05	0.00114	126	0.161	0.999	17804	1
TSR1	-9.74	8	-3.05	0.00114	127	0.161	0.999	17803	1
PIM1	-9.73	8	-3.05	0.00116	128	0.162	0.999	17802	1
PSMA7	-9.69	8	-3.03	0.00121	129	0.168	0.999	17801	1
TAF5	-9.64	8	-3.02	0.00127	130	0.175	0.999	17800	1
UMPS	-9.63	8	-3.02	0.00128	131	0.175	0.999	17799	1
IPO13	-9.61	8	-3.01	0.00131	132	0.178	0.999	17798	1
RPL7	-8.32	6	-3.01	0.00132	133	0.178	0.999	17797	1
HIST1H2AA	-9.59	8	-3	0.00134	134	0.179	0.999	17796	1
DDX47	-9.57	8	-3	0.00137	135	0.181	0.999	17795	1
STAG1	-9.56	8	-2.99	0.00139	136	0.181	0.999	17794	1
PSMB1	-9.55	8	-2.99	0.00139	137	0.181	0.999	17793	1
HYAL3	-9.55	8	-2.99	0.0014	138	0.181	0.999	17792	1
PATE2	-9.46	8	-2.96	0.00153	139	0.197	0.998	17791	1
EXOSC4	-9.45	8	-2.96	0.00156	140	0.199	0.998	17790	1
POLR1A	-9.43	8	-2.95	0.00158	141	0.201	0.998	17789	1
RPL27	-6.62	4	-2.93	0.0017	142	0.214	0.998	17788	1
OGT	-9.35	8	-2.93	0.00171	143	0.214	0.998	17787	1
NOB1	-9.34	8	-2.92	0.00173	144	0.214	0.998	17786	1
DKC1	-9.34	8	-2.92	0.00173	145	0.214	0.998	17785	1
MED10	-9.29	8	-2.91	0.00183	146	0.224	0.998	17784	1
KCTD1	-9.26	8	-2.9	0.00188	147	0.23	0.998	17783	1
ATP5B	-9.23	8	-2.89	0.00194	148	0.235	0.998	17782	1
NCF2	-9.16	8	-2.86	0.00209	149	0.251	0.998	17781	1
RPS13	-9.09	8	-2.84	0.00224	150	0.266	0.998	17780	1
CSNK2A3	-7.87	6	-2.84	0.00224	151	0.266	0.998	17779	1
RPP40	-9.05	8	-2.83	0.00233	152	0.273	0.998	17778	1
TRPC7	-9.05	8	-2.83	0.00233	153	0.273	0.998	17777	1
PSMD11	-9.04	8	-2.83	0.00235	154	0.274	0.998	17776	1
SARS	-9	8	-2.81	0.00244	155	0.282	0.998	17775	1
CHMP6	-7.78	6	-2.81	0.00248	156	0.285	0.998	17774	1
SKA3	-8.97	8	-2.8	0.00252	157	0.287	0.997	17773	1
TNKS2	-8.97	8	-2.8	0.00253	158	0.287	0.997	17772	1
SAC3D1	-8.96	8	-2.8	0.00256	159	0.289	0.997	17771	1
GNL3L	-8.93	8	-2.79	0.00263	160	0.294	0.997	17770	1
POLR2C	-8.92	8	-2.79	0.00266	161	0.296	0.997	17769	1
KCNH1	-8.89	8	-2.78	0.00274	162	0.302	0.997	17768	1
NOL6	-8.88	8	-2.78	0.00275	163	0.302	0.997	17767	1
UBL4B	-8.88	8	-2.77	0.00277	164	0.302	0.997	17766	1
SAP18	-8.87	8	-2.77	0.00278	165	0.302	0.997	17765	1
GRSF1	-8.29	7	-2.77	0.0028	166	0.302	0.997	17764	1
AMIGO1	-8.83	8	-2.76	0.00291	167	0.312	0.997	17763	1
BRF1	-8.8	8	-2.75	0.00299	168	0.319	0.997	17762	1
CREB1	-8.79	8	-2.74	0.00303	169	0.321	0.997	17761	1
ARPC4	-8.76	8	-2.74	0.0031	170	0.327	0.997	17760	1
TRA2A	-8.75	8	-2.73	0.00314	171	0.328	0.997	17759	1
COL20A1	-8.75	8	-2.73	0.00315	172	0.328	0.997	17758	1
GATA4	-8.73	8	-2.73	0.00321	173	0.333	0.997	17757	1
TMEM246	-8.69	8	-2.71	0.00332	174	0.342	0.997	17756	1
POPDC3	-8.69	8	-2.71	0.00334	175	0.342	0.997	17755	1
FARSA	-8.67	8	-2.71	0.00338	176	0.343	0.997	17754	1
RPS19	-7.51	6	-2.71	0.00338	177	0.343	0.997	17753	1
UQCRC1	-8.66	8	-2.7	0.00343	178	0.344	0.997	17752	1
MFSD3	-8.66	8	-2.7	0.00343	179	0.344	0.997	17751	1
BYSL	-8.64	8	-2.7	0.00349	180	0.347	0.997	17750	1
CD6	-8.63	8	-2.69	0.00353	181	0.35	0.996	17749	1
ANKLE2	-8.62	8	-2.69	0.00355	182	0.35	0.996	17748	1
PPP1R15B	-8.61	8	-2.69	0.00358	183	0.351	0.996	17747	1
RPL36	-8.56	8	-2.67	0.00377	184	0.367	0.996	17746	1
TAB1	-8.55	8	-2.67	0.00381	185	0.367	0.996	17745	1
ZNF76	-8.55	8	-2.67	0.00381	186	0.367	0.996	17744	1
NIPAL1	-7.99	7	-2.66	0.00385	187	0.369	0.996	17743	1
KIAA1875	-8.52	8	-2.66	0.00391	188	0.371	0.996	17742	1
CCT2	-8.51	8	-2.65	0.00397	189	0.371	0.996	17741	1
ISG20L2	-8.51	8	-2.65	0.00397	190	0.371	0.996	17740	1
PSMB3	-8.5	8	-2.65	0.00399	191	0.371	0.996	17739	1
MIXL1	-8.5	8	-2.65	0.004	192	0.371	0.996	17738	1
WDR75	-8.5	8	-2.65	0.00401	193	0.371	0.996	17737	1
KPNB1	-8.49	8	-2.65	0.00403	194	0.371	0.996	17736	1
THAP1	-8.49	8	-2.65	0.00404	195	0.371	0.996	17735	1
BTG1	-8.48	8	-2.65	0.00406	196	0.371	0.996	17734	1
PES1	-8.44	8	-2.63	0.00421	197	0.383	0.996	17733	1
LYN	-8.4	8	-2.62	0.00437	198	0.394	0.996	17732	1
CRLF1	-8.4	8	-2.62	0.00437	199	0.394	0.996	17731	1
FLVCR1	-8.38	8	-2.62	0.00446	200	0.4	0.996	17730	1
SCNN1D	-8.36	8	-2.61	0.00455	201	0.404	0.995	17729	1
DONSON	-8.36	8	-2.61	0.00455	202	0.404	0.995	17728	1
MRI1	-8.35	8	-2.6	0.0046	203	0.406	0.995	17727	1
SMU1	-8.33	8	-2.6	0.0047	204	0.413	0.995	17726	1
TRIM33	-8.32	8	-2.6	0.00472	205	0.413	0.995	17725	1
NRAS	-8.32	8	-2.59	0.00474	206	0.413	0.995	17724	1
MYL2	-8.3	8	-2.59	0.00482	207	0.417	0.995	17723	1
ZBTB8OS	-8.28	8	-2.58	0.00492	208	0.424	0.995	17722	1
KLHDC8A	-8.26	8	-2.58	0.00501	209	0.43	0.995	17721	1
EIF4A3	-8.25	8	-2.57	0.00505	210	0.431	0.995	17720	1
BNIPL	-7.7	7	-2.57	0.00513	211	0.435	0.995	17719	1
NOP58	-7.13	6	-2.57	0.00515	212	0.435	0.995	17718	1
HEATR3	-8.22	8	-2.56	0.00517	213	0.436	0.995	17717	1
NGDN	-8.21	8	-2.56	0.00523	214	0.437	0.995	17716	1
FURIN	-8.21	8	-2.56	0.00524	215	0.437	0.995	17715	1
RRP9	-8.2	8	-2.56	0.00529	216	0.439	0.995	17714	1
RNFT2	-8.19	8	-2.55	0.00533	217	0.44	0.995	17713	1
AK2	-8.18	8	-2.55	0.00538	218	0.442	0.995	17712	1
EIF2B2	-8.17	8	-2.55	0.00545	219	0.446	0.995	17711	1
HSPA5	-8.16	8	-2.54	0.0055	220	0.448	0.994	17710	1
C19orf48	-8.15	8	-2.54	0.00553	221	0.448	0.994	17709	1
RPL31	-5.75	4	-2.54	0.0056	222	0.451	0.994	17708	1
DHRS4	-8.14	8	-2.54	0.00561	223	0.451	0.994	17707	1
ESRRG	-8.13	8	-2.53	0.00564	224	0.451	0.994	17706	1
ARHGEF12	-8.12	8	-2.53	0.00569	225	0.452	0.994	17705	1
TRAIP	-8.12	8	-2.53	0.0057	226	0.452	0.994	17704	1
FAU	-8.1	8	-2.53	0.00578	227	0.456	0.994	17703	1
DDX10	-8.1	8	-2.52	0.00583	228	0.458	0.994	17702	1
AURKA	-8.08	8	-2.52	0.00592	229	0.463	0.994	17701	1
CORT	-5.71	4	-2.51	0.00595	230	0.464	0.994	17700	1
MAN2C1	-8.06	8	-2.51	0.00604	231	0.469	0.994	17699	1
FUBP1	-8.05	8	-2.51	0.00609	232	0.47	0.994	17698	1
CECR6	-8.04	8	-2.5	0.00612	233	0.471	0.994	17697	1
HPDL	-8.03	8	-2.5	0.00618	234	0.473	0.994	17696	1
KIAA1429	-8.03	8	-2.5	0.0062	235	0.473	0.994	17695	1
CCDC60	-8	8	-2.49	0.00636	236	0.482	0.994	17694	1
NOL10	-8	8	-2.49	0.00638	237	0.482	0.994	17693	1
NFIA	-7.97	8	-2.48	0.00655	238	0.493	0.993	17692	1
UTP3	-7.95	8	-2.48	0.00662	239	0.494	0.993	17691	1
PTH1R	-7.95	8	-2.48	0.00666	240	0.494	0.993	17690	1
PSMA2	-7.95	8	-2.47	0.00667	241	0.494	0.993	17689	1
TADA2B	-7.94	8	-2.47	0.00669	242	0.494	0.993	17688	1
CCT5	-7.94	8	-2.47	0.00669	243	0.494	0.993	17687	1
CD74	-7.9	8	-2.46	0.00697	244	0.512	0.993	17686	1
CDK1	-7.87	8	-2.45	0.00713	245	0.522	0.993	17685	1
POLR2B	-7.85	8	-2.44	0.00725	246	0.528	0.993	17684	1
EMD	-7.85	8	-2.44	0.00729	247	0.528	0.993	17683	1
ARID3B	-7.84	8	-2.44	0.00735	248	0.528	0.993	17682	1
E2F4	-7.83	8	-2.44	0.00738	249	0.528	0.993	17681	1
EIF5	-7.83	8	-2.44	0.00739	250	0.528	0.993	17680	1
B3GAT2	-7.83	8	-2.44	0.0074	251	0.528	0.993	17679	1
DHX37	-7.83	8	-2.44	0.00742	252	0.528	0.993	17678	1
RHOF	-7.82	8	-2.43	0.00746	253	0.529	0.993	17677	1
RPS23	-7.81	8	-2.43	0.00754	254	0.533	0.992	17676	1
RNMT	-7.79	8	-2.43	0.00765	255	0.538	0.992	17675	1
SRSF3	-7.79	8	-2.42	0.00769	256	0.539	0.992	17674	1
RRP36	-7.76	8	-2.41	0.00787	257	0.546	0.992	17673	1
ZFP69	-7.76	8	-2.41	0.00788	258	0.546	0.992	17672	1
CCT8	-7.76	8	-2.41	0.00789	259	0.546	0.992	17671	1
USP37	-7.74	8	-2.41	0.00803	260	0.551	0.992	17670	1
KRT4	-7.74	8	-2.41	0.00805	261	0.551	0.992	17669	1
CCDC64	-7.73	8	-2.41	0.00806	262	0.551	0.992	17668	1
CAMSAP3	-7.73	8	-2.4	0.00811	263	0.553	0.992	17667	1
CDK18	-7.72	8	-2.4	0.00819	264	0.556	0.992	17666	1
RNF181	-7.7	8	-2.4	0.00829	265	0.561	0.992	17665	1
WDR90	-7.7	8	-2.39	0.00833	266	0.561	0.992	17664	1
NCSTN	-7.69	8	-2.39	0.00838	267	0.561	0.992	17663	1
NETO2	-7.69	8	-2.39	0.00839	268	0.561	0.992	17662	1
RBM14	-7.64	8	-2.38	0.00877	269	0.584	0.991	17661	1
PNMA3	-7.62	8	-2.37	0.00891	270	0.592	0.991	17660	1
GNS	-7.61	8	-2.37	0.00898	271	0.592	0.991	17659	1
POLR2M	-7.61	8	-2.37	0.00898	272	0.592	0.991	17658	1
PDZK1IP1	-7.61	8	-2.36	0.00902	273	0.592	0.991	17657	1
ZBTB7B	-7.59	8	-2.36	0.0091	274	0.596	0.991	17656	1
RINL	-7.58	8	-2.36	0.00921	275	0.599	0.991	17655	1
SUSD4	-7.58	8	-2.36	0.00922	276	0.599	0.991	17654	1
LAMA4	-7.58	8	-2.36	0.00925	277	0.599	0.991	17653	1
GPX2	-7.57	8	-2.35	0.0093	278	0.6	0.991	17652	1
NDFIP1	-7.55	8	-2.35	0.00948	279	0.609	0.991	17651	1
PDE4DIP	-7.54	8	-2.34	0.00952	280	0.609	0.99	17650	1
C1QL3	-7.54	8	-2.34	0.00956	281	0.61	0.99	17649	1
ICOSLG	-7.53	8	-2.34	0.00959	282	0.61	0.99	17648	1
POLR2L	-7.5	8	-2.33	0.00989	283	0.626	0.99	17647	1
DNAH10	-7.49	8	-2.33	0.00993	284	0.626	0.99	17646	1
BTAF1	-7.49	8	-2.33	0.00994	285	0.626	0.99	17645	1
TRMT112	-7.49	8	-2.33	0.01	286	0.626	0.99	17644	1
UTP23	-7.48	8	-2.33	0.01	287	0.626	0.99	17643	1
RPL9	-3.73	2	-2.32	0.0102	288	0.633	0.99	17642	1
UCKL1	-7.46	8	-2.32	0.0102	289	0.633	0.99	17641	1
RPS9	-7.46	8	-2.32	0.0102	290	0.633	0.99	17640	1
HOXC8	-7.42	8	-2.3	0.0106	291	0.651	0.989	17639	1
SMIM1	-7.41	8	-2.3	0.0107	292	0.651	0.989	17638	1
CA14	-7.41	8	-2.3	0.0107	293	0.651	0.989	17637	1
GTPBP4	-7.4	8	-2.3	0.0107	294	0.651	0.989	17636	1
C19orf60	-7.39	8	-2.3	0.0108	295	0.651	0.989	17635	1
CIB4	-7.39	8	-2.3	0.0108	296	0.651	0.989	17634	1
PNKD	-7.39	8	-2.3	0.0108	297	0.651	0.989	17633	1
RNASE4	-7.39	8	-2.3	0.0109	298	0.651	0.989	17632	1
UTP11L	-7.39	8	-2.3	0.0109	299	0.651	0.989	17631	1
KIF13B	-7.37	8	-2.29	0.0111	300	0.661	0.989	17630	1
PRPF38B	-7.36	8	-2.28	0.0112	301	0.664	0.989	17629	1
PROM2	-7.35	8	-2.28	0.0112	302	0.664	0.989	17628	1
RPL37A	-5.2	4	-2.28	0.0112	303	0.664	0.989	17627	1
VWA3A	-7.33	8	-2.28	0.0114	304	0.671	0.989	17626	1
FCF1	-5.18	4	-2.28	0.0114	305	0.671	0.989	17625	1
ZNF704	-7.32	8	-2.27	0.0115	306	0.675	0.988	17624	1
BZRAP1	-7.31	8	-2.27	0.0116	307	0.675	0.988	17623	1
NMD3	-7.28	8	-2.26	0.0119	308	0.693	0.988	17622	1
NOL11	-7.27	8	-2.26	0.012	309	0.695	0.988	17621	1
ADCK3	-7.26	8	-2.25	0.0121	310	0.695	0.988	17620	1
OR5M11	-7.26	8	-2.25	0.0121	311	0.695	0.988	17619	1
MOBP	-7.26	8	-2.25	0.0121	312	0.695	0.988	17618	1
OR2B3	-7.25	8	-2.25	0.0122	313	0.699	0.988	17617	1
RPL12	-7.24	8	-2.25	0.0123	314	0.704	0.988	17616	1
SBNO1	-7.21	8	-2.24	0.0126	315	0.713	0.987	17615	1
COPA	-7.21	8	-2.24	0.0126	316	0.713	0.987	17614	1
C6orf62	-7.21	8	-2.24	0.0126	317	0.713	0.987	17613	1
TSC22D2	-7.21	8	-2.24	0.0126	318	0.713	0.987	17612	1
GTF2A2	-7.2	8	-2.24	0.0127	319	0.713	0.987	17611	1
PAX9	-7.2	8	-2.23	0.0128	320	0.713	0.987	17610	1
GLCE	-6.23	6	-2.23	0.0128	321	0.713	0.987	17609	1
RPL19	-7.18	8	-2.23	0.0129	322	0.72	0.987	17608	1
ROMO1	-7.16	8	-2.22	0.0131	323	0.728	0.987	17607	1
BPIFB3	-7.16	8	-2.22	0.0132	324	0.729	0.987	17606	1
TTC4	-7.15	8	-2.22	0.0132	325	0.73	0.987	17605	1
LRIG3	-7.14	8	-2.22	0.0133	326	0.733	0.987	17604	1
LOR	-7.13	8	-2.21	0.0135	327	0.738	0.987	17603	1
NOP14	-7.13	8	-2.21	0.0135	328	0.738	0.987	17602	1
TSEN2	-7.12	8	-2.21	0.0136	329	0.74	0.986	17601	1
FDXACB1	-7.12	8	-2.21	0.0136	330	0.741	0.986	17600	1
MRPS12	-7.11	8	-2.21	0.0137	331	0.741	0.986	17599	1
MTPN	-7.1	8	-2.2	0.0138	332	0.741	0.986	17598	1
TTLL10	-7.1	8	-2.2	0.0138	333	0.741	0.986	17597	1
PSMC5	-7.1	8	-2.2	0.0138	334	0.741	0.986	17596	1
SELRC1	-7.1	8	-2.2	0.0139	335	0.741	0.986	17595	1
DSP	-7.09	8	-2.2	0.0139	336	0.741	0.986	17594	1
SPEN	-7.09	8	-2.2	0.014	337	0.741	0.986	17593	1
DDX54	-7.08	8	-2.2	0.0141	338	0.741	0.986	17592	1
PPP2R2A	-7.07	8	-2.19	0.0141	339	0.741	0.986	17591	1
RPP14	-7.07	8	-2.19	0.0141	340	0.741	0.986	17590	1
FBLN2	-7.07	8	-2.19	0.0141	341	0.741	0.986	17589	1
TMEM5	-7.07	8	-2.19	0.0141	342	0.741	0.986	17588	1
FASTKD2	-7.06	8	-2.19	0.0143	343	0.747	0.986	17587	1
CGN	-7.05	8	-2.19	0.0144	344	0.747	0.986	17586	1
SLC35G1	-7.05	8	-2.19	0.0144	345	0.747	0.986	17585	1
SPATA5L1	-7.04	8	-2.18	0.0145	346	0.748	0.986	17584	1
PSMD7	-7.04	8	-2.18	0.0145	347	0.748	0.986	17583	1
HIST1H1B	-7.04	8	-2.18	0.0146	348	0.749	0.985	17582	1
SAFB	-7.03	8	-2.18	0.0146	349	0.749	0.985	17581	1
ALDOA	-7.03	8	-2.18	0.0146	350	0.749	0.985	17580	1
FLG2	-7.03	8	-2.18	0.0147	351	0.749	0.985	17579	1
NUDT3	-7.02	8	-2.18	0.0147	352	0.75	0.985	17578	1
DHRS4L2	-6.07	6	-2.17	0.0148	353	0.754	0.985	17577	1
RIMBP2	-7	8	-2.17	0.0149	354	0.756	0.985	17576	1
ARVCF	-7	8	-2.17	0.015	355	0.756	0.985	17575	1
KCNJ12	-7	8	-2.17	0.015	356	0.756	0.985	17574	1
SHOC2	-6.99	8	-2.17	0.0151	357	0.761	0.985	17573	1
TTLL3	-6.98	8	-2.16	0.0152	358	0.762	0.985	17572	1
IRAK2	-6.98	8	-2.16	0.0153	359	0.762	0.985	17571	1
GNB3	-6.98	8	-2.16	0.0153	360	0.762	0.985	17570	1
MYO10	-6.96	8	-2.16	0.0155	361	0.771	0.984	17569	1
FTO	-6.95	8	-2.15	0.0156	362	0.772	0.984	17568	1
MTHFS	-6.95	8	-2.15	0.0156	363	0.772	0.984	17567	1
CCDC7	-6.94	8	-2.15	0.0157	364	0.772	0.984	17566	1
S1PR3	-6.01	6	-2.15	0.0157	365	0.772	0.984	17565	1
RAB7A	-6.92	8	-2.15	0.016	366	0.781	0.984	17564	1
SPATA13	-6.92	8	-2.14	0.016	367	0.782	0.984	17563	1
MRPL38	-5.99	6	-2.14	0.0161	368	0.782	0.984	17562	1
DDX21	-6.9	8	-2.14	0.0162	369	0.785	0.984	17561	1
OR6J1	-6.9	8	-2.14	0.0163	370	0.785	0.984	17560	1
PRRT2	-6.9	8	-2.14	0.0163	371	0.785	0.984	17559	1
RIMKLA	-6.89	8	-2.14	0.0163	372	0.785	0.984	17558	1
CHMP4B	-6.89	8	-2.14	0.0164	373	0.785	0.984	17557	1
LAS1L	-6.89	8	-2.13	0.0164	374	0.785	0.984	17556	1
ALG2	-6.89	8	-2.13	0.0164	375	0.785	0.984	17555	1
RPE65	-6.88	8	-2.13	0.0165	376	0.785	0.984	17554	1
FOXA2	-6.88	8	-2.13	0.0166	377	0.787	0.983	17553	1
RASEF	-6.86	8	-2.12	0.0168	378	0.797	0.983	17552	1
GPN1	-6.85	8	-2.12	0.0169	379	0.799	0.983	17551	1
STAB1	-6.85	8	-2.12	0.017	380	0.799	0.983	17550	1
PWP2	-6.85	8	-2.12	0.017	381	0.799	0.983	17549	1
GNAI3	-6.84	8	-2.12	0.017	382	0.799	0.983	17548	1
TBL3	-6.83	8	-2.12	0.0172	383	0.804	0.983	17547	1
BAIAP3	-6.82	8	-2.11	0.0174	384	0.805	0.983	17546	1
C1orf198	-6.81	8	-2.11	0.0174	385	0.805	0.983	17545	1
ACTL6B	-6.81	8	-2.11	0.0174	386	0.805	0.983	17544	1
GBF1	-6.81	8	-2.11	0.0174	387	0.805	0.983	17543	1
BBC3	-6.81	8	-2.11	0.0174	388	0.805	0.983	17542	1
DNMT1	-6.81	8	-2.11	0.0175	389	0.805	0.983	17541	1
TEX13B	-6.8	8	-2.11	0.0176	390	0.807	0.982	17540	1
CASC3	-6.8	8	-2.11	0.0176	391	0.807	0.982	17539	1
PPTC7	-6.79	8	-2.1	0.0177	392	0.807	0.982	17538	1
MTNR1B	-6.79	8	-2.1	0.0177	393	0.807	0.982	17537	1
LIN28A	-6.79	8	-2.1	0.0178	394	0.808	0.982	17536	1
RBMX	-3.39	2	-2.1	0.0179	395	0.812	0.982	17535	1
GFRA3	-6.77	8	-2.1	0.018	396	0.812	0.982	17534	1
CHMP2B	-6.77	8	-2.1	0.018	397	0.812	0.982	17533	1
KREMEN1	-6.77	8	-2.1	0.018	398	0.812	0.982	17532	1
LRPPRC	-6.76	8	-2.09	0.0182	399	0.816	0.982	17531	1
IL2RB	-6.75	8	-2.09	0.0183	400	0.817	0.982	17530	1
WTAP	-6.75	8	-2.09	0.0183	401	0.817	0.982	17529	1
AADACL3	-6.75	8	-2.09	0.0183	402	0.817	0.982	17528	1
TSPAN1	-6.74	8	-2.09	0.0185	403	0.82	0.982	17527	1
DIS3	-6.74	8	-2.09	0.0185	404	0.82	0.982	17526	1
IFITM3	-6.73	8	-2.08	0.0186	405	0.82	0.981	17525	1
TAF13	-6.72	8	-2.08	0.0187	406	0.82	0.981	17524	1
ACADS	-6.72	8	-2.08	0.0187	407	0.82	0.981	17523	1
LIN9	-6.72	8	-2.08	0.0188	408	0.82	0.981	17522	1
ATP5C1	-6.72	8	-2.08	0.0188	409	0.82	0.981	17521	1
LYPD4	-6.72	8	-2.08	0.0188	410	0.82	0.981	17520	1
ZBTB9	-6.71	8	-2.08	0.0188	411	0.82	0.981	17519	1
LINGO3	-6.71	8	-2.08	0.0189	412	0.82	0.981	17518	1
SMG6	-6.71	8	-2.08	0.0189	413	0.82	0.981	17517	1
KIAA0895L	-6.7	8	-2.08	0.019	414	0.82	0.981	17516	1
RRM1	-6.7	8	-2.08	0.019	415	0.82	0.981	17515	1
KMT2D	-6.7	8	-2.07	0.0191	416	0.822	0.981	17514	1
IP6K1	-6.69	8	-2.07	0.0191	417	0.823	0.981	17513	1
ASPM	-6.69	8	-2.07	0.0192	418	0.826	0.981	17512	1
TIMM17A	-6.68	8	-2.07	0.0193	419	0.826	0.981	17511	1
C3AR1	-6.68	8	-2.07	0.0194	420	0.827	0.981	17510	1
KIF26A	-6.68	8	-2.07	0.0194	421	0.827	0.981	17509	1
TSACC	-5.78	6	-2.06	0.0195	422	0.827	0.98	17508	1
RBM15B	-6.67	8	-2.06	0.0195	423	0.827	0.98	17507	1
CCT7	-6.66	8	-2.06	0.0196	424	0.827	0.98	17506	1
ITIH3	-6.66	8	-2.06	0.0196	425	0.827	0.98	17505	1
NUP160	-6.66	8	-2.06	0.0197	426	0.827	0.98	17504	1
RPS3A	-4.71	4	-2.06	0.0197	427	0.827	0.98	17503	1
DPEP1	-6.65	8	-2.06	0.0198	428	0.828	0.98	17502	1
SERPINA3	-6.64	8	-2.05	0.02	429	0.836	0.98	17501	1
GALK1	-6.63	8	-2.05	0.0202	430	0.839	0.98	17500	1
HTR3D	-6.63	8	-2.05	0.0202	431	0.839	0.98	17499	1
RAB43	-6.61	8	-2.05	0.0204	432	0.845	0.98	17498	1
NXT1	-6.61	8	-2.04	0.0205	433	0.846	0.98	17497	1
MAML2	-6.6	8	-2.04	0.0205	434	0.846	0.979	17496	1
LRRK2	-6.6	8	-2.04	0.0206	435	0.846	0.979	17495	1
CASKIN2	-6.59	8	-2.04	0.0207	436	0.846	0.979	17494	1
NAT16	-6.59	8	-2.04	0.0207	437	0.846	0.979	17493	1
EXOC6B	-6.59	8	-2.04	0.0207	438	0.846	0.979	17492	1
C4orf3	-6.59	8	-2.04	0.0207	439	0.846	0.979	17491	1
INHBB	-6.59	8	-2.04	0.0208	440	0.846	0.979	17490	1
AIFM1	-6.59	8	-2.04	0.0208	441	0.846	0.979	17489	1
PRMT7	-6.58	8	-2.04	0.0209	442	0.846	0.979	17488	1
KIAA1143	-6.58	8	-2.04	0.0209	443	0.846	0.979	17487	1
PREP	-6.58	8	-2.03	0.021	444	0.846	0.979	17486	1
MSL2	-6.57	8	-2.03	0.021	445	0.847	0.979	17485	1
TNNI1	-6.57	8	-2.03	0.0211	446	0.849	0.979	17484	1
VIPAS39	-6.56	8	-2.03	0.0212	447	0.85	0.979	17483	1
SUPV3L1	-6.56	8	-2.03	0.0213	448	0.85	0.979	17482	1
TMEM63A	-6.55	8	-2.02	0.0214	449	0.852	0.979	17481	1
PDE4A	-6.55	8	-2.02	0.0215	450	0.852	0.979	17480	1
DIRAS3	-6.54	8	-2.02	0.0215	451	0.852	0.979	17479	1
MEF2A	-6.54	8	-2.02	0.0215	452	0.852	0.979	17478	1
PABPN1L	-6.54	8	-2.02	0.0216	453	0.854	0.978	17477	1
CBY1	-6.53	8	-2.02	0.0217	454	0.855	0.978	17476	1
BRINP2	-6.53	8	-2.02	0.0217	455	0.855	0.978	17475	1
AP3S1	-6.53	8	-2.02	0.0217	456	0.855	0.978	17474	1
NUS1	-6.52	8	-2.02	0.0218	457	0.856	0.978	17473	1
CLDN3	-6.52	8	-2.02	0.0219	458	0.856	0.978	17472	1
C12orf76	-6.52	8	-2.01	0.022	459	0.856	0.978	17471	1
FAM107A	-6.51	8	-2.01	0.022	460	0.856	0.978	17470	1
EIF3A	-6.51	8	-2.01	0.022	461	0.856	0.978	17469	1
UNCX	-6.51	8	-2.01	0.0221	462	0.858	0.978	17468	1
ADSS	-6.5	8	-2.01	0.0222	463	0.858	0.978	17467	1
OR6C76	-6.5	8	-2.01	0.0223	464	0.858	0.978	17466	1
PAK1IP1	-6.5	8	-2.01	0.0223	465	0.858	0.978	17465	1
KIF21B	-6.48	8	-2	0.0226	466	0.858	0.977	17464	1
ZYG11A	-6.48	8	-2	0.0226	467	0.858	0.977	17463	1
BSND	-6.48	8	-2	0.0226	468	0.858	0.977	17462	1
PCNXL4	-6.48	8	-2	0.0226	469	0.858	0.977	17461	1
MYLIP	-6.48	8	-2	0.0226	470	0.858	0.977	17460	1
NSFL1C	-6.47	8	-2	0.0227	471	0.858	0.977	17459	1
C11orf30	-6.47	8	-2	0.0227	472	0.858	0.977	17458	1
OLA1	-6.47	8	-2	0.0227	473	0.858	0.977	17457	1
PSMA1	-6.47	8	-2	0.0228	474	0.858	0.977	17456	1
BRAP	-6.46	8	-2	0.0229	475	0.858	0.977	17455	1
AGT	-6.46	8	-2	0.023	476	0.858	0.977	17454	1
IFT57	-6.45	8	-1.99	0.023	477	0.858	0.977	17453	1
WDR77	-6.45	8	-1.99	0.0231	478	0.858	0.977	17452	1
PNPT1	-6.45	8	-1.99	0.0231	479	0.858	0.977	17451	1
IMP4	-6.45	8	-1.99	0.0231	480	0.858	0.977	17450	1
CCDC9	-6.45	8	-1.99	0.0232	481	0.858	0.977	17449	1
TSHB	-6.45	8	-1.99	0.0232	482	0.858	0.977	17448	1
SNX27	-6.45	8	-1.99	0.0232	483	0.858	0.977	17447	1
DHFR	-5.58	6	-1.99	0.0232	484	0.858	0.977	17446	1
BCLAF1	-6.44	8	-1.99	0.0232	485	0.858	0.977	17445	1
C10orf67	-6.44	8	-1.99	0.0233	486	0.86	0.977	17444	1
RAB25	-6.43	8	-1.99	0.0234	487	0.863	0.977	17443	1
SCAMP4	-6.42	8	-1.98	0.0236	488	0.866	0.976	17442	1
RNF13	-6.42	8	-1.98	0.0237	489	0.866	0.976	17441	1
RACGAP1	-6.42	8	-1.98	0.0237	490	0.866	0.976	17440	1
NDFIP2	-6.41	8	-1.98	0.0238	491	0.866	0.976	17439	1
CAD	-6.41	8	-1.98	0.0239	492	0.866	0.976	17438	1
LRRC8E	-6.41	8	-1.98	0.0239	493	0.866	0.976	17437	1
MRTO4	-6.41	8	-1.98	0.0239	494	0.866	0.976	17436	1
B3GALNT2	-6.4	8	-1.98	0.024	495	0.868	0.976	17435	1
C20orf85	-6.4	8	-1.98	0.0241	496	0.868	0.976	17434	1
CRCT1	-6.39	8	-1.97	0.0242	497	0.868	0.976	17433	1
CHPF2	-6.39	8	-1.97	0.0242	498	0.868	0.976	17432	1
FUT11	-6.39	8	-1.97	0.0243	499	0.868	0.976	17431	1
NCOA2	-6.38	8	-1.97	0.0243	500	0.868	0.976	17430	1
NCKAP5L	-6.38	8	-1.97	0.0244	501	0.868	0.976	17429	1
SMC4	-6.38	8	-1.97	0.0244	502	0.868	0.976	17428	1
ELP6	-6.38	8	-1.97	0.0244	503	0.868	0.976	17427	1
DLST	-6.38	8	-1.97	0.0244	504	0.868	0.976	17426	1
APOA2	-6.38	8	-1.97	0.0244	505	0.868	0.976	17425	1
TBCD	-6.37	8	-1.97	0.0246	506	0.87	0.975	17424	1
SNRNP27	-6.37	8	-1.97	0.0246	507	0.871	0.975	17423	1
PPDPF	-6.36	8	-1.96	0.0247	508	0.872	0.975	17422	1
ZNF839	-6.35	8	-1.96	0.0248	509	0.874	0.975	17421	1
CD48	-6.35	8	-1.96	0.0249	510	0.875	0.975	17420	1
TMEM143	-6.35	8	-1.96	0.025	511	0.875	0.975	17419	1
ATL2	-6.35	8	-1.96	0.025	512	0.875	0.975	17418	1
ANKRD42	-6.34	8	-1.96	0.0251	513	0.875	0.975	17417	1
SMKR1	-6.34	8	-1.96	0.0251	514	0.875	0.975	17416	1
EXOSC8	-6.34	8	-1.96	0.0252	515	0.877	0.975	17415	1
CMTM1	-6.32	8	-1.95	0.0255	516	0.881	0.975	17414	1
RCAN2	-6.32	8	-1.95	0.0255	517	0.881	0.975	17413	1
OR51B4	-6.32	8	-1.95	0.0255	518	0.881	0.975	17412	1
TCHHL1	-6.31	8	-1.95	0.0256	519	0.881	0.974	17411	1
TBC1D30	-6.31	8	-1.95	0.0256	520	0.881	0.974	17410	1
ZNF287	-6.31	8	-1.95	0.0256	521	0.881	0.974	17409	1
C15orf37	-6.31	8	-1.95	0.0257	522	0.881	0.974	17408	1
OLFML3	-6.31	8	-1.95	0.0257	523	0.882	0.974	17407	1
TAF1L	-6.3	8	-1.94	0.0259	524	0.884	0.974	17406	1
CDCA5	-6.3	8	-1.94	0.0259	525	0.884	0.974	17405	1
DGKA	-6.3	8	-1.94	0.0259	526	0.884	0.974	17404	1
OR1J1	-6.29	8	-1.94	0.026	527	0.884	0.974	17403	1
ACACB	-6.29	8	-1.94	0.0261	528	0.887	0.974	17402	1
ZIC2	-6.29	8	-1.94	0.0262	529	0.887	0.974	17401	1
ATAD3A	-5.43	6	-1.94	0.0264	530	0.891	0.974	17400	1
CNOT10	-6.27	8	-1.94	0.0265	531	0.891	0.974	17399	1
MAN1A2	-6.27	8	-1.94	0.0265	532	0.891	0.974	17398	1
MAP4K2	-6.27	8	-1.93	0.0265	533	0.891	0.973	17397	1
FAM174B	-6.27	8	-1.93	0.0265	534	0.891	0.973	17396	1
IQSEC1	-6.26	8	-1.93	0.0266	535	0.891	0.973	17395	1
RAB6B	-6.26	8	-1.93	0.0267	536	0.892	0.973	17394	1
KDM1A	-6.25	8	-1.93	0.0268	537	0.894	0.973	17393	1
MCM3AP	-6.25	8	-1.93	0.0269	538	0.894	0.973	17392	1
RPL38	-6.25	8	-1.93	0.0269	539	0.894	0.973	17391	1
COL16A1	-5.41	6	-1.93	0.0269	540	0.894	0.973	17390	1
PER2	-6.23	8	-1.92	0.0272	541	0.896	0.973	17389	1
FCRLA	-6.23	8	-1.92	0.0272	542	0.896	0.973	17388	1
TRIM31	-6.23	8	-1.92	0.0273	543	0.896	0.973	17387	1
RFX6	-6.23	8	-1.92	0.0273	544	0.896	0.973	17386	1
EMC1	-6.23	8	-1.92	0.0273	545	0.896	0.973	17385	1
PCMTD1	-6.22	8	-1.92	0.0274	546	0.896	0.973	17384	1
ARX	-6.22	8	-1.92	0.0274	547	0.896	0.973	17383	1
SLC39A8	-6.22	8	-1.92	0.0274	548	0.896	0.973	17382	1
DEPDC1	-6.22	8	-1.92	0.0275	549	0.896	0.973	17381	1
TMBIM6	-6.22	8	-1.92	0.0275	550	0.896	0.973	17380	1
SRP68	-6.21	8	-1.92	0.0276	551	0.896	0.972	17379	1
NUP88	-6.21	8	-1.92	0.0276	552	0.896	0.972	17378	1
NUTF2	-6.21	8	-1.92	0.0277	553	0.898	0.972	17377	1
SORT1	-6.2	8	-1.91	0.0278	554	0.9	0.972	17376	1
HRCT1	-6.2	8	-1.91	0.0279	555	0.903	0.972	17375	1
CSE1L	-6.19	8	-1.91	0.0281	556	0.904	0.972	17374	1
SERPINE2	-6.19	8	-1.91	0.0281	557	0.904	0.972	17373	1
FAM83H	-6.18	8	-1.91	0.0282	558	0.904	0.972	17372	1
LEF1	-6.18	8	-1.91	0.0282	559	0.904	0.972	17371	1
EXTL3	-6.17	8	-1.9	0.0285	560	0.91	0.971	17370	1
RPL13	-4.36	4	-1.9	0.0286	561	0.91	0.971	17369	1
CSTF3	-6.17	8	-1.9	0.0286	562	0.91	0.971	17368	1
NCAPG	-6.16	8	-1.9	0.0287	563	0.91	0.971	17367	1
CSDE1	-6.16	8	-1.9	0.0287	564	0.91	0.971	17366	1
SMOC1	-6.16	8	-1.9	0.0287	565	0.91	0.971	17365	1
WDR26	-5.33	6	-1.9	0.0287	566	0.91	0.971	17364	1
PRM1	-6.15	8	-1.9	0.0288	567	0.912	0.971	17363	1
CENPA	-6.15	8	-1.9	0.029	568	0.914	0.971	17362	1
TENC1	-6.15	8	-1.9	0.029	569	0.914	0.971	17361	1
SCN8A	-6.14	8	-1.89	0.0291	570	0.916	0.971	17360	1
NRIP3	-6.13	8	-1.89	0.0293	571	0.916	0.971	17359	1
FAM69A	-6.13	8	-1.89	0.0293	572	0.916	0.971	17358	1
NAA25	-6.13	8	-1.89	0.0293	573	0.916	0.971	17357	1
TTF2	-6.13	8	-1.89	0.0293	574	0.916	0.971	17356	1
TAF3	-6.11	8	-1.88	0.0297	575	0.923	0.97	17355	1
BHLHE41	-6.11	8	-1.88	0.0298	576	0.923	0.97	17354	1
ATP2B2	-6.11	8	-1.88	0.0299	577	0.923	0.97	17353	1
PRPF40B	-6.11	8	-1.88	0.0299	578	0.923	0.97	17352	1
ZNF35	-6.1	8	-1.88	0.0299	579	0.923	0.97	17351	1
ANLN	-5.71	7	-1.88	0.0299	580	0.923	0.97	17350	1
C2orf50	-6.1	8	-1.88	0.0299	581	0.923	0.97	17349	1
CCL28	-5.28	6	-1.88	0.03	582	0.926	0.97	17348	1
TEAD1	-6.09	8	-1.88	0.0301	583	0.926	0.97	17347	1
KIF23	-6.09	8	-1.88	0.0303	584	0.926	0.97	17346	1
LIPM	-6.09	8	-1.88	0.0303	585	0.926	0.97	17345	1
ZNF682	-6.08	8	-1.88	0.0303	586	0.926	0.97	17344	1
LHX8	-6.08	8	-1.88	0.0304	587	0.926	0.97	17343	1
UBE2Q1	-6.08	8	-1.88	0.0304	588	0.926	0.97	17342	1
CHML	-6.08	8	-1.87	0.0304	589	0.926	0.97	17341	1
VTA1	-6.08	8	-1.87	0.0305	590	0.927	0.969	17340	1
NDUFB2	-6.07	8	-1.87	0.0305	591	0.927	0.969	17339	1
TM4SF18	-6.07	8	-1.87	0.0307	592	0.93	0.969	17338	1
NCOA6	-6.07	8	-1.87	0.0308	593	0.93	0.969	17337	1
GVQW1	-6.06	8	-1.87	0.031	594	0.934	0.969	17336	1
SGIP1	-6.05	8	-1.87	0.031	595	0.934	0.969	17335	1
OR2A12	-6.04	8	-1.86	0.0313	596	0.94	0.969	17334	1
GCC1	-6.04	8	-1.86	0.0313	597	0.941	0.969	17333	1
TWISTNB	-6.04	8	-1.86	0.0314	598	0.942	0.969	17332	1
ALX3	-6.03	8	-1.86	0.0316	599	0.945	0.968	17331	1
RPL10	-5.22	6	-1.86	0.0317	600	0.947	0.968	17330	1
CEPT1	-6.02	8	-1.86	0.0318	601	0.948	0.968	17329	1
LXN	-6.02	8	-1.85	0.0319	602	0.948	0.968	17328	1
RAPGEFL1	-6.01	8	-1.85	0.0319	603	0.948	0.968	17327	1
ISCA1	-3.01	2	-1.85	0.032	604	0.948	0.968	17326	1
PITPNM2	-6.01	8	-1.85	0.032	605	0.948	0.968	17325	1
CEP63	-6.01	8	-1.85	0.032	606	0.948	0.968	17324	1
MTBP	-6.01	8	-1.85	0.0321	607	0.948	0.968	17323	1
OSGEP	-6	8	-1.85	0.0322	608	0.95	0.968	17322	1
ANKRD1	-6	8	-1.85	0.0323	609	0.952	0.968	17321	1
ARID3A	-5.99	8	-1.85	0.0325	610	0.955	0.967	17320	1
RAB4A	-5.98	8	-1.84	0.0326	611	0.956	0.967	17319	1
PPAPDC1B	-5.98	8	-1.84	0.0327	612	0.956	0.967	17318	1
THAP11	-5.98	8	-1.84	0.0327	613	0.956	0.967	17317	1
GNL2	-5.97	8	-1.84	0.0328	614	0.956	0.967	17316	1
SLMO1	-5.97	8	-1.84	0.033	615	0.956	0.967	17315	1
C6orf226	-5.96	8	-1.84	0.0331	616	0.956	0.967	17314	1
SCARF1	-5.96	8	-1.84	0.0331	617	0.956	0.967	17313	1
PEAK1	-5.96	8	-1.83	0.0333	618	0.956	0.967	17312	1
TSR2	-5.96	8	-1.83	0.0333	619	0.956	0.967	17311	1
TNFSF9	-5.95	8	-1.83	0.0334	620	0.956	0.967	17310	1
CDC42BPB	-5.95	8	-1.83	0.0335	621	0.956	0.967	17309	1
CD80	-5.95	8	-1.83	0.0335	622	0.956	0.967	17308	1
DHRS2	-5.95	8	-1.83	0.0335	623	0.956	0.967	17307	1
GLE1	-5.95	8	-1.83	0.0335	624	0.956	0.966	17306	1
LYPD2	-5.94	8	-1.83	0.0335	625	0.956	0.966	17305	1
ZMAT3	-5.94	8	-1.83	0.0337	626	0.956	0.966	17304	1
SCRIB	-5.93	8	-1.83	0.0338	627	0.956	0.966	17303	1
ACTG1	-5.93	8	-1.83	0.0338	628	0.956	0.966	17302	1
SP7	-5.93	8	-1.83	0.0338	629	0.956	0.966	17301	1
PIEZO2	-5.93	8	-1.83	0.0338	630	0.956	0.966	17300	1
TMEM14E	-5.93	8	-1.83	0.0339	631	0.956	0.966	17299	1
BUB1B	-5.93	8	-1.83	0.0339	632	0.956	0.966	17298	1
TADA1	-5.93	8	-1.83	0.034	633	0.956	0.966	17297	1
CATSPER1	-5.93	8	-1.83	0.034	634	0.956	0.966	17296	1
PPP1R10	-5.92	8	-1.82	0.034	635	0.956	0.966	17295	1
BAD	-5.92	8	-1.82	0.0341	636	0.956	0.966	17294	1
C19orf70	-5.92	8	-1.82	0.0341	637	0.956	0.966	17293	1
IGF1R	-5.92	8	-1.82	0.0341	638	0.956	0.966	17292	1
UNC50	-5.92	8	-1.82	0.0342	639	0.956	0.966	17291	1
MICU1	-5.92	8	-1.82	0.0342	640	0.956	0.966	17290	1
MTRF1L	-5.92	8	-1.82	0.0342	641	0.956	0.966	17289	1
FAIM2	-5.91	8	-1.82	0.0343	642	0.956	0.966	17288	1
FANCE	-5.91	8	-1.82	0.0344	643	0.956	0.966	17287	1
URB2	-5.91	8	-1.82	0.0344	644	0.956	0.966	17286	1
CUTA	-5.91	8	-1.82	0.0344	645	0.956	0.966	17285	1
CCDC58	-2.95	2	-1.82	0.0345	646	0.956	0.966	17284	1
SPPL3	-5.9	8	-1.82	0.0346	647	0.959	0.965	17283	1
DDX59	-5.11	6	-1.82	0.0347	648	0.959	0.965	17282	1
ABCD3	-5.89	8	-1.81	0.0348	649	0.96	0.965	17281	1
HNF4A	-5.89	8	-1.81	0.0348	650	0.96	0.965	17280	1
DDO	-5.89	8	-1.81	0.0349	651	0.96	0.965	17279	1
MFSD10	-5.89	8	-1.81	0.035	652	0.96	0.965	17278	1
IRF6	-5.89	8	-1.81	0.035	653	0.96	0.965	17277	1
DBX1	-5.88	8	-1.81	0.035	654	0.96	0.965	17276	1
NCMAP	-5.88	8	-1.81	0.0352	655	0.963	0.965	17275	1
COL5A1	-5.88	8	-1.81	0.0352	656	0.963	0.965	17274	1
ZNF551	-5.86	8	-1.8	0.0355	657	0.966	0.964	17273	1
RAB32	-5.86	8	-1.8	0.0356	658	0.966	0.964	17272	1
RPLP2	-5.07	6	-1.8	0.0357	659	0.966	0.964	17271	1
N4BP3	-5.86	8	-1.8	0.0357	660	0.966	0.964	17270	1
IL18R1	-5.85	8	-1.8	0.0358	661	0.966	0.964	17269	1
SDAD1	-5.85	8	-1.8	0.0359	662	0.966	0.964	17268	1
MCOLN3	-5.85	8	-1.8	0.0359	663	0.966	0.964	17267	1
C21orf33	-5.85	8	-1.8	0.0359	664	0.966	0.964	17266	1
DNAH12	-5.85	8	-1.8	0.0359	665	0.966	0.964	17265	1
C9orf57	-5.85	8	-1.8	0.0359	666	0.966	0.964	17264	1
AACS	-5.85	8	-1.8	0.0359	667	0.966	0.964	17263	1
PVRL4	-5.84	8	-1.8	0.0361	668	0.967	0.964	17262	1
DHX30	-5.84	8	-1.8	0.0361	669	0.967	0.964	17261	1
BRI3BP	-5.84	8	-1.8	0.0361	670	0.967	0.964	17260	1
NDUFS1	-5.84	8	-1.8	0.0362	671	0.967	0.964	17259	1
NR2F1	-5.83	8	-1.79	0.0363	672	0.967	0.964	17258	1
SLC25A18	-5.83	8	-1.79	0.0364	673	0.967	0.964	17257	1
MPV17L2	-5.83	8	-1.79	0.0364	674	0.967	0.964	17256	1
CPSF4	-5.83	8	-1.79	0.0364	675	0.967	0.964	17255	1
DPY19L2	-5.82	8	-1.79	0.0365	676	0.968	0.963	17254	1
YY1AP1	-5.82	8	-1.79	0.0366	677	0.968	0.963	17253	1
TNFAIP8L1	-5.82	8	-1.79	0.0367	678	0.971	0.963	17252	1
FANCD2	-5.82	8	-1.79	0.0368	679	0.971	0.963	17251	1
VEGFB	-5.81	8	-1.79	0.037	680	0.975	0.963	17250	1
TLL2	-5.8	8	-1.79	0.0371	681	0.976	0.963	17249	1
OR3A2	-5.8	8	-1.79	0.0371	682	0.976	0.963	17248	1
EIF4EBP1	-5.8	8	-1.78	0.0372	683	0.976	0.963	17247	1
LBR	-5.8	8	-1.78	0.0373	684	0.977	0.963	17246	1
CCDC172	-5.79	8	-1.78	0.0373	685	0.977	0.963	17245	1
NUP62	-5.79	8	-1.78	0.0374	686	0.977	0.963	17244	1
C16orf86	-5.79	8	-1.78	0.0375	687	0.98	0.962	17243	1
SHCBP1L	-5.78	8	-1.78	0.0377	688	0.98	0.962	17242	1
IL31	-5.78	8	-1.78	0.0377	689	0.98	0.962	17241	1
FAM196B	-5.78	8	-1.78	0.0378	690	0.98	0.962	17240	1
NUP214	-5.78	8	-1.78	0.0378	691	0.98	0.962	17239	1
PLEKHG5	-5.77	8	-1.77	0.038	692	0.981	0.962	17238	1
SLC16A7	-5.77	8	-1.77	0.038	693	0.981	0.962	17237	1
TRIM66	-5.76	8	-1.77	0.0381	694	0.981	0.962	17236	1
ROR1	-5.76	8	-1.77	0.0381	695	0.981	0.962	17235	1
CCR5	-5.76	8	-1.77	0.0382	696	0.981	0.962	17234	1
PPAPDC2	-5.76	8	-1.77	0.0382	697	0.981	0.962	17233	1
BAK1	-5.75	8	-1.77	0.0385	698	0.981	0.962	17232	1
POMGNT2	-5.75	8	-1.77	0.0385	699	0.981	0.962	17231	1
NRG1	-5.75	8	-1.77	0.0386	700	0.981	0.961	17230	1
RCC1	-5.74	8	-1.77	0.0387	701	0.981	0.961	17229	1
CLASP2	-5.74	8	-1.77	0.0387	702	0.981	0.961	17228	1
ONECUT2	-5.74	8	-1.77	0.0387	703	0.981	0.961	17227	1
ACOX3	-5.74	8	-1.77	0.0388	704	0.981	0.961	17226	1
SMNDC1	-5.74	8	-1.76	0.0388	705	0.981	0.961	17225	1
ZP4	-5.74	8	-1.76	0.0388	706	0.981	0.961	17224	1
OR4S1	-5.73	8	-1.76	0.039	707	0.981	0.961	17223	1
YES1	-5.73	8	-1.76	0.0391	708	0.981	0.961	17222	1
LGALS3	-5.73	8	-1.76	0.0391	709	0.981	0.961	17221	1
STAT2	-5.73	8	-1.76	0.0391	710	0.981	0.961	17220	1
ACTR2	-5.73	8	-1.76	0.0391	711	0.981	0.961	17219	1
EBNA1BP2	-5.72	8	-1.76	0.0393	712	0.981	0.961	17218	1
DDX51	-5.72	8	-1.76	0.0394	713	0.981	0.961	17217	1
POU4F2	-5.72	8	-1.76	0.0394	714	0.981	0.961	17216	1
TFDP3	-5.71	8	-1.75	0.0397	715	0.981	0.96	17215	1
EFHB	-5.7	8	-1.75	0.0397	716	0.981	0.96	17214	1
RHOA	-5.7	8	-1.75	0.0398	717	0.981	0.96	17213	1
RNF41	-5.7	8	-1.75	0.0398	718	0.981	0.96	17212	1
GLO1	-5.7	8	-1.75	0.0398	719	0.981	0.96	17211	1
SIKE1	-5.7	8	-1.75	0.0399	720	0.981	0.96	17210	1
RCL1	-5.7	8	-1.75	0.0399	721	0.981	0.96	17209	1
AP3M2	-5.7	8	-1.75	0.0399	722	0.981	0.96	17208	1
WNT7A	-5.7	8	-1.75	0.04	723	0.981	0.96	17207	1
PPP2R3A	-5.7	8	-1.75	0.04	724	0.981	0.96	17206	1
FHL1	-5.69	8	-1.75	0.0401	725	0.981	0.96	17205	1
LPAR2	-5.69	8	-1.75	0.0401	726	0.981	0.96	17204	1
C8orf74	-5.69	8	-1.75	0.0401	727	0.981	0.96	17203	1
YEATS4	-5.69	8	-1.75	0.0401	728	0.981	0.96	17202	1
CACYBP	-5.69	8	-1.75	0.0401	729	0.981	0.96	17201	1
PGF	-5.69	8	-1.75	0.0402	730	0.981	0.96	17200	1
GPR88	-5.69	8	-1.75	0.0402	731	0.981	0.96	17199	1
RRP1	-5.69	8	-1.75	0.0403	732	0.981	0.96	17198	1
CXCR6	-5.68	8	-1.75	0.0403	733	0.981	0.96	17197	1
C14orf142	-4.92	6	-1.75	0.0403	734	0.981	0.96	17196	1
NUDT21	-5.68	8	-1.75	0.0404	735	0.981	0.96	17195	1
TMEM50A	-5.68	8	-1.75	0.0405	736	0.981	0.96	17194	1
KCNQ2	-5.68	8	-1.75	0.0405	737	0.981	0.96	17193	1
EIF3B	-5.68	8	-1.75	0.0405	738	0.981	0.96	17192	1
ITPRIPL2	-5.68	8	-1.74	0.0405	739	0.981	0.959	17191	1
PRKAA2	-5.67	8	-1.74	0.0406	740	0.981	0.959	17190	1
ADH1A	-5.67	8	-1.74	0.0407	741	0.981	0.959	17189	1
UBLCP1	-5.67	8	-1.74	0.0408	742	0.981	0.959	17188	1
MAP3K7	-5.66	8	-1.74	0.0408	743	0.981	0.959	17187	1
ARHGAP30	-5.66	8	-1.74	0.0409	744	0.981	0.959	17186	1
EPPK1	-5.66	8	-1.74	0.0409	745	0.981	0.959	17185	1
BSDC1	-5.66	8	-1.74	0.041	746	0.981	0.959	17184	1
ASB18	-5.66	8	-1.74	0.0411	747	0.981	0.959	17183	1
RABGAP1L	-5.66	8	-1.74	0.0411	748	0.981	0.959	17182	1
DDX24	-5.65	8	-1.74	0.0411	749	0.981	0.959	17181	1
IKZF2	-5.65	8	-1.74	0.0412	750	0.981	0.959	17180	1
MRPL34	-5.65	8	-1.74	0.0412	751	0.981	0.959	17179	1
PSMG3	-5.65	8	-1.74	0.0412	752	0.981	0.959	17178	1
SRSF1	-5.65	8	-1.74	0.0413	753	0.981	0.959	17177	1
CYC1	-5.65	8	-1.73	0.0414	754	0.981	0.959	17176	1
FAM96B	-5.64	8	-1.73	0.0414	755	0.981	0.959	17175	1
KRT18	-4.89	6	-1.73	0.0415	756	0.981	0.959	17174	1
MTA1	-5.64	8	-1.73	0.0415	757	0.981	0.959	17173	1
POMP	-5.64	8	-1.73	0.0415	758	0.981	0.959	17172	1
FBRSL1	-5.64	8	-1.73	0.0416	759	0.983	0.958	17171	1
CDC7	-5.63	8	-1.73	0.0417	760	0.983	0.958	17170	1
VPS26B	-5.63	8	-1.73	0.0418	761	0.983	0.958	17169	1
C20orf194	-5.63	8	-1.73	0.0418	762	0.983	0.958	17168	1
CRYGC	-5.63	8	-1.73	0.0419	763	0.983	0.958	17167	1
GNAI2	-5.63	8	-1.73	0.0419	764	0.983	0.958	17166	1
MAPK14	-5.62	8	-1.73	0.0421	765	0.983	0.958	17165	1
AATF	-5.62	8	-1.73	0.0422	766	0.983	0.958	17164	1
PRCP	-5.61	8	-1.72	0.0423	767	0.983	0.958	17163	1
TCTA	-5.61	8	-1.72	0.0423	768	0.983	0.958	17162	1
SLC2A9	-5.61	8	-1.72	0.0424	769	0.983	0.958	17161	1
UBIAD1	-5.61	8	-1.72	0.0424	770	0.983	0.958	17160	1
CPNE4	-5.6	8	-1.72	0.0426	771	0.983	0.957	17159	1
WNT3A	-5.6	8	-1.72	0.0426	772	0.983	0.957	17158	1
DNASE1L3	-5.6	8	-1.72	0.0427	773	0.983	0.957	17157	1
INO80B	-5.6	8	-1.72	0.0428	774	0.983	0.957	17156	1
C1orf56	-5.59	8	-1.72	0.0429	775	0.983	0.957	17155	1
SCLY	-5.59	8	-1.72	0.043	776	0.983	0.957	17154	1
C20orf195	-5.59	8	-1.72	0.043	777	0.983	0.957	17153	1
ANAPC5	-5.59	8	-1.72	0.043	778	0.983	0.957	17152	1
C7orf13	-5.58	8	-1.71	0.0432	779	0.983	0.957	17151	1
COX14	-5.58	8	-1.71	0.0432	780	0.983	0.957	17150	1
KCNA10	-5.58	8	-1.71	0.0433	781	0.983	0.957	17149	1
NLRP10	-5.58	8	-1.71	0.0434	782	0.983	0.957	17148	1
NHP2	-5.58	8	-1.71	0.0434	783	0.983	0.957	17147	1
POLR1C	-5.57	8	-1.71	0.0434	784	0.983	0.957	17146	1
LRIF1	-5.57	8	-1.71	0.0435	785	0.983	0.957	17145	1
POLR1D	-5.57	8	-1.71	0.0435	786	0.983	0.956	17144	1
PPP1R12B	-5.57	8	-1.71	0.0435	787	0.983	0.956	17143	1
ATF7IP2	-5.57	8	-1.71	0.0436	788	0.983	0.956	17142	1
OPHN1	-5.57	8	-1.71	0.0436	789	0.983	0.956	17141	1
UROS	-4.82	6	-1.71	0.0436	790	0.983	0.956	17140	1
MAPKAPK3	-5.56	8	-1.71	0.0439	791	0.983	0.956	17139	1
SESN2	-5.55	8	-1.71	0.0441	792	0.983	0.956	17138	1
BOLL	-5.55	8	-1.7	0.0441	793	0.983	0.956	17137	1
DNM3	-5.55	8	-1.7	0.0442	794	0.983	0.956	17136	1
UTP6	-5.54	8	-1.7	0.0443	795	0.983	0.956	17135	1
GFOD2	-5.54	8	-1.7	0.0444	796	0.983	0.956	17134	1
LAMA1	-5.54	8	-1.7	0.0444	797	0.983	0.956	17133	1
CRTAC1	-5.54	8	-1.7	0.0445	798	0.983	0.956	17132	1
CD81	-5.53	8	-1.7	0.0447	799	0.983	0.955	17131	1
HUS1B	-5.53	8	-1.7	0.0449	800	0.983	0.955	17130	1
ERMARD	-5.53	8	-1.7	0.0449	801	0.983	0.955	17129	1
PLA2G2F	-5.52	8	-1.7	0.045	802	0.983	0.955	17128	1
ARMCX1	-5.52	8	-1.7	0.045	803	0.983	0.955	17127	1
PELI3	-5.52	8	-1.7	0.045	804	0.983	0.955	17126	1
SLC35E2B	-5.52	8	-1.69	0.0451	805	0.983	0.955	17125	1
WDR65	-5.51	8	-1.69	0.0453	806	0.983	0.955	17124	1
TAF10	-5.51	8	-1.69	0.0453	807	0.983	0.955	17123	1
GPR108	-5.51	8	-1.69	0.0453	808	0.983	0.955	17122	1
MLLT4	-5.51	8	-1.69	0.0454	809	0.983	0.955	17121	1
STK4	-5.51	8	-1.69	0.0455	810	0.983	0.955	17120	1
PPT1	-5.5	8	-1.69	0.0456	811	0.983	0.954	17119	1
FAM115C	-5.5	8	-1.69	0.0456	812	0.983	0.954	17118	1
BCL2L12	-5.5	8	-1.69	0.0457	813	0.983	0.954	17117	1
SPTSSB	-5.49	8	-1.69	0.0459	814	0.983	0.954	17116	0.999
HSD11B2	-5.49	8	-1.69	0.0459	815	0.983	0.954	17115	0.999
ZNF862	-5.49	8	-1.68	0.046	816	0.983	0.954	17114	0.999
ADRA2A	-5.49	8	-1.68	0.0461	817	0.983	0.954	17113	0.999
HIST1H3B	-3.88	4	-1.68	0.0461	818	0.983	0.954	17112	0.999
IRF9	-5.48	8	-1.68	0.0462	819	0.983	0.954	17111	0.999
PXN	-4.75	6	-1.68	0.0462	820	0.983	0.954	17110	0.999
APOC3	-5.48	8	-1.68	0.0462	821	0.983	0.954	17109	0.999
FBXO43	-5.48	8	-1.68	0.0462	822	0.983	0.954	17108	0.999
PAGE5	-5.48	8	-1.68	0.0462	823	0.983	0.954	17107	0.999
GPD2	-5.48	8	-1.68	0.0462	824	0.983	0.954	17106	0.999
ALX1	-5.48	8	-1.68	0.0463	825	0.983	0.954	17105	0.999
LCK	-5.48	8	-1.68	0.0463	826	0.983	0.954	17104	0.999
RPUSD1	-5.48	8	-1.68	0.0463	827	0.983	0.954	17103	0.999
CCNC	-5.47	8	-1.68	0.0465	828	0.983	0.953	17102	0.999
DENND2D	-5.47	8	-1.68	0.0465	829	0.983	0.953	17101	0.999
PHGR1	-5.47	8	-1.68	0.0465	830	0.983	0.953	17100	0.999
MRPS18C	-5.47	8	-1.68	0.0466	831	0.983	0.953	17099	0.999
GAS2L3	-5.47	8	-1.68	0.0466	832	0.983	0.953	17098	0.999
OR7G3	-5.47	8	-1.68	0.0466	833	0.983	0.953	17097	0.999
CCR9	-5.47	8	-1.68	0.0467	834	0.983	0.953	17096	0.999
CNTN3	-5.47	8	-1.68	0.0468	835	0.983	0.953	17095	0.999
PEA15	-5.46	8	-1.68	0.0468	836	0.983	0.953	17094	0.999
ZNF823	-5.46	8	-1.68	0.0468	837	0.983	0.953	17093	0.999
FABP1	-5.46	8	-1.68	0.0469	838	0.983	0.953	17092	0.999
THEM5	-5.45	8	-1.67	0.0474	839	0.983	0.953	17091	0.999
CSK	-5.44	8	-1.67	0.0474	840	0.983	0.953	17090	0.999
FLJ27365	-5.44	8	-1.67	0.0475	841	0.983	0.953	17089	0.999
ZXDC	-5.44	8	-1.67	0.0475	842	0.983	0.952	17088	0.999
LAMA3	-5.44	8	-1.67	0.0477	843	0.983	0.952	17087	0.999
CPSF7	-5.44	8	-1.67	0.0477	844	0.983	0.952	17086	0.999
MAGEA12	-5.43	8	-1.67	0.0478	845	0.983	0.952	17085	0.999
RMND5A	-5.43	8	-1.67	0.0479	846	0.983	0.952	17084	0.999
KIAA0895	-5.43	8	-1.67	0.0479	847	0.983	0.952	17083	0.999
TP53BP2	-5.43	8	-1.67	0.0479	848	0.983	0.952	17082	0.999
RIOK2	-5.43	8	-1.66	0.048	849	0.983	0.952	17081	0.999
DOHH	-5.43	8	-1.66	0.048	850	0.983	0.952	17080	0.999
RRAGC	-5.43	8	-1.66	0.048	851	0.983	0.952	17079	0.999
CAMK1G	-5.43	8	-1.66	0.0481	852	0.983	0.952	17078	0.999
POLR2E	-5.42	8	-1.66	0.0482	853	0.983	0.952	17077	0.999
F11R	-5.42	8	-1.66	0.0482	854	0.983	0.952	17076	0.999
SCN10A	-5.41	8	-1.66	0.0484	855	0.983	0.952	17075	0.999
VPS37B	-5.41	8	-1.66	0.0484	856	0.983	0.952	17074	0.999
PRSS27	-5.41	8	-1.66	0.0486	857	0.983	0.951	17073	0.999
HAT1	-5.41	8	-1.66	0.0486	858	0.983	0.951	17072	0.999
GPR152	-5.41	8	-1.66	0.0487	859	0.983	0.951	17071	0.999
PIFO	-5.4	8	-1.66	0.0489	860	0.983	0.951	17070	0.999
EPRS	-5.4	8	-1.66	0.0489	861	0.983	0.951	17069	0.999
NDUFA5	-5.4	8	-1.65	0.049	862	0.983	0.951	17068	0.999
UTP14A	-5.39	8	-1.65	0.0491	863	0.983	0.951	17067	0.999
CTGF	-5.39	8	-1.65	0.0492	864	0.983	0.951	17066	0.999
NEK8	-5.39	8	-1.65	0.0492	865	0.983	0.951	17065	0.999
MESP1	-5.39	8	-1.65	0.0493	866	0.983	0.951	17064	0.999
DHH	-5.38	8	-1.65	0.0494	867	0.983	0.951	17063	0.999
CACNG3	-5.38	8	-1.65	0.0494	868	0.983	0.951	17062	0.999
CAPN6	-5.38	8	-1.65	0.0494	869	0.983	0.951	17061	0.999
KIF18A	-5.38	8	-1.65	0.0495	870	0.983	0.951	17060	0.999
EGFL7	-5.38	8	-1.65	0.0495	871	0.983	0.951	17059	0.999
ZBTB17	-5.38	8	-1.65	0.0496	872	0.983	0.95	17058	0.999
BCL7A	-5.38	8	-1.65	0.0496	873	0.983	0.95	17057	0.999
EIF2S1	-5.38	8	-1.65	0.0497	874	0.983	0.95	17056	0.999
STX8	-5.37	8	-1.65	0.0498	875	0.983	0.95	17055	0.999
PDLIM2	-5.37	8	-1.65	0.0498	876	0.983	0.95	17054	0.999
POLR2F	-5.37	8	-1.65	0.0498	877	0.983	0.95	17053	0.999
SYT14	-5.37	8	-1.65	0.0499	878	0.983	0.95	17052	0.999
TSSK6	-5.37	8	-1.65	0.0499	879	0.983	0.95	17051	0.999
IBA57	-5.37	8	-1.65	0.0499	880	0.983	0.95	17050	0.999
CCDC27	-5.37	8	-1.64	0.05	881	0.983	0.95	17049	0.999
S100A1	-5.36	8	-1.64	0.05	882	0.983	0.95	17048	0.999
ADAM22	-5.36	8	-1.64	0.0501	883	0.983	0.95	17047	0.999
PSMD13	-5.36	8	-1.64	0.0502	884	0.983	0.95	17046	0.999
NFE2	-5.36	8	-1.64	0.0502	885	0.983	0.95	17045	0.999
YPEL5	-5.36	8	-1.64	0.0503	886	0.983	0.95	17044	0.999
KCNK9	-5.35	8	-1.64	0.0504	887	0.983	0.95	17043	0.999
TSKU	-5.35	8	-1.64	0.0504	888	0.983	0.95	17042	0.999
WSCD2	-5.35	8	-1.64	0.0505	889	0.983	0.95	17041	0.999
ASB15	-5.35	8	-1.64	0.0505	890	0.983	0.95	17040	0.999
CLEC16A	-5.35	8	-1.64	0.0506	891	0.983	0.949	17039	0.999
ISCA2	-5.35	8	-1.64	0.0506	892	0.983	0.949	17038	0.999
UQCRC2	-5.34	8	-1.64	0.0508	893	0.983	0.949	17037	0.999
VPS13B	-5.34	8	-1.64	0.0509	894	0.983	0.949	17036	0.999
SLCO5A1	-5.34	8	-1.64	0.051	895	0.983	0.949	17035	0.999
KIF26B	-5.34	8	-1.64	0.051	896	0.983	0.949	17034	0.999
C6orf48	-5.33	8	-1.63	0.0511	897	0.983	0.949	17033	0.999
CUEDC2	-5.33	8	-1.63	0.0511	898	0.983	0.949	17032	0.999
HAPLN2	-5.33	8	-1.63	0.0511	899	0.983	0.949	17031	0.999
XKR7	-5.31	8	-1.63	0.0517	900	0.983	0.948	17030	0.998
IL1RAPL2	-5.31	8	-1.63	0.0518	901	0.983	0.948	17029	0.998
KCNC4	-5.31	8	-1.63	0.0519	902	0.983	0.948	17028	0.998
CDCA4	-5.31	8	-1.63	0.052	903	0.983	0.948	17027	0.998
GPX7	-5.3	8	-1.62	0.0521	904	0.983	0.948	17026	0.998
NUP153	-5.3	8	-1.62	0.0522	905	0.983	0.948	17025	0.998
RNASEH2B	-5.3	8	-1.62	0.0523	906	0.983	0.948	17024	0.998
MS4A1	-5.29	8	-1.62	0.0524	907	0.983	0.948	17023	0.998
PRAME	-5.29	8	-1.62	0.0524	908	0.983	0.948	17022	0.998
SEMG1	-5.29	8	-1.62	0.0525	909	0.983	0.948	17021	0.998
MBD1	-5.29	8	-1.62	0.0525	910	0.983	0.947	17020	0.998
FAM230A	-5.29	8	-1.62	0.0526	911	0.983	0.947	17019	0.998
SLC7A3	-5.29	8	-1.62	0.0527	912	0.983	0.947	17018	0.998
DND1	-5.28	8	-1.62	0.0527	913	0.983	0.947	17017	0.998
MBOAT1	-5.28	8	-1.62	0.0528	914	0.983	0.947	17016	0.998
NUMA1	-5.28	8	-1.62	0.0528	915	0.983	0.947	17015	0.998
MYEOV	-5.28	8	-1.62	0.0529	916	0.983	0.947	17014	0.998
ACTR3	-5.28	8	-1.62	0.053	917	0.983	0.947	17013	0.998
HESX1	-5.28	8	-1.62	0.053	918	0.983	0.947	17012	0.998
GTPBP1	-5.28	8	-1.62	0.053	919	0.983	0.947	17011	0.998
AMER3	-5.28	8	-1.62	0.053	920	0.983	0.947	17010	0.998
DDR1	-5.27	8	-1.61	0.0532	921	0.983	0.947	17009	0.998
DNAH7	-5.27	8	-1.61	0.0532	922	0.983	0.947	17008	0.998
MAP1LC3C	-5.27	8	-1.61	0.0533	923	0.983	0.947	17007	0.998
ME2	-5.27	8	-1.61	0.0534	924	0.983	0.947	17006	0.998
ABCC4	-5.26	8	-1.61	0.0535	925	0.983	0.947	17005	0.998
KANK2	-5.26	8	-1.61	0.0536	926	0.983	0.946	17004	0.998
SLC16A2	-5.26	8	-1.61	0.0537	927	0.983	0.946	17003	0.998
ACTC1	-5.26	8	-1.61	0.0537	928	0.983	0.946	17002	0.998
PROC	-5.25	8	-1.61	0.0538	929	0.983	0.946	17001	0.998
ZC3H13	-4.55	6	-1.61	0.0539	930	0.983	0.946	17000	0.998
ARNTL2	-5.25	8	-1.61	0.0539	931	0.983	0.946	16999	0.998
FOS	-5.25	8	-1.61	0.0539	932	0.983	0.946	16998	0.998
WBP1L	-5.25	8	-1.61	0.054	933	0.983	0.946	16997	0.998
GPR32	-5.25	8	-1.61	0.054	934	0.983	0.946	16996	0.998
SUGP2	-5.25	8	-1.61	0.0541	935	0.983	0.946	16995	0.998
PI15	-5.25	8	-1.61	0.0541	936	0.983	0.946	16994	0.998
CCDC53	-5.24	8	-1.61	0.0542	937	0.983	0.946	16993	0.998
ERCC1	-5.24	8	-1.6	0.0543	938	0.983	0.946	16992	0.998
IGFBP2	-5.24	8	-1.6	0.0543	939	0.983	0.946	16991	0.998
STAG2	-5.24	8	-1.6	0.0543	940	0.983	0.946	16990	0.998
ESPN	-5.24	8	-1.6	0.0543	941	0.983	0.946	16989	0.998
GPX1	-5.24	8	-1.6	0.0543	942	0.983	0.946	16988	0.998
C1GALT1	-5.24	8	-1.6	0.0544	943	0.983	0.946	16987	0.998
TBK1	-5.24	8	-1.6	0.0545	944	0.983	0.946	16986	0.998
SLAMF6	-5.23	8	-1.6	0.0546	945	0.983	0.945	16985	0.998
CRAMP1L	-5.23	8	-1.6	0.0547	946	0.983	0.945	16984	0.998
SMARCC1	-5.23	8	-1.6	0.0547	947	0.983	0.945	16983	0.998
NAT6	-5.22	8	-1.6	0.0549	948	0.983	0.945	16982	0.998
CDK9	-5.22	8	-1.6	0.055	949	0.983	0.945	16981	0.998
LCE3A	-5.22	8	-1.6	0.055	950	0.983	0.945	16980	0.998
EVA1A	-5.22	8	-1.6	0.055	951	0.983	0.945	16979	0.998
TNFRSF8	-5.21	8	-1.6	0.0552	952	0.983	0.945	16978	0.998
MYADM	-4.88	7	-1.6	0.0553	953	0.983	0.945	16977	0.998
RPL35A	-4.51	6	-1.6	0.0553	954	0.983	0.945	16976	0.998
CD38	-5.21	8	-1.59	0.0555	955	0.983	0.945	16975	0.998
ANKRD18A	-2.6	2	-1.59	0.0556	956	0.983	0.944	16974	0.998
GLS	-5.2	8	-1.59	0.0557	957	0.983	0.944	16973	0.998
EIF1AX	-5.2	8	-1.59	0.0557	958	0.983	0.944	16972	0.998
OLIG2	-5.2	8	-1.59	0.0558	959	0.983	0.944	16971	0.998
MRPL18	-5.2	8	-1.59	0.0558	960	0.983	0.944	16970	0.998
C1orf95	-5.2	8	-1.59	0.0559	961	0.983	0.944	16969	0.998
EXOSC3	-5.2	8	-1.59	0.0559	962	0.983	0.944	16968	0.998
GLP1R	-5.19	8	-1.59	0.056	963	0.983	0.944	16967	0.998
C6orf141	-5.19	8	-1.59	0.0561	964	0.983	0.944	16966	0.997
GRIP1	-5.19	8	-1.59	0.0561	965	0.983	0.944	16965	0.997
ILK	-5.19	8	-1.59	0.0562	966	0.983	0.944	16964	0.997
TMBIM4	-5.18	8	-1.59	0.0563	967	0.983	0.944	16963	0.997
C11orf63	-5.18	8	-1.59	0.0563	968	0.983	0.944	16962	0.997
ACADSB	-5.18	8	-1.59	0.0564	969	0.983	0.944	16961	0.997
GSG1L	-5.18	8	-1.59	0.0565	970	0.983	0.944	16960	0.997
PAGR1	-5.18	8	-1.59	0.0565	971	0.983	0.944	16959	0.997
GSC	-5.18	8	-1.58	0.0566	972	0.983	0.943	16958	0.997
OR2G2	-5.18	8	-1.58	0.0566	973	0.983	0.943	16957	0.997
ATP13A2	-5.17	8	-1.58	0.0567	974	0.983	0.943	16956	0.997
RBP4	-5.17	8	-1.58	0.0567	975	0.983	0.943	16955	0.997
ZFP36L1	-5.17	8	-1.58	0.0567	976	0.983	0.943	16954	0.997
PLXNA4	-5.17	8	-1.58	0.0569	977	0.983	0.943	16953	0.997
KLHL26	-5.17	8	-1.58	0.0569	978	0.983	0.943	16952	0.997
SLC16A14	-5.16	8	-1.58	0.0571	979	0.983	0.943	16951	0.997
FAM84A	-5.16	8	-1.58	0.0572	980	0.983	0.943	16950	0.997
GPI	-5.16	8	-1.58	0.0572	981	0.983	0.943	16949	0.997
POLR3E	-5.16	8	-1.58	0.0572	982	0.983	0.943	16948	0.997
CRISPLD2	-5.16	8	-1.58	0.0573	983	0.983	0.943	16947	0.997
CPZ	-5.15	8	-1.58	0.0574	984	0.983	0.943	16946	0.997
CITED1	-5.15	8	-1.58	0.0574	985	0.983	0.943	16945	0.997
UBR5	-5.15	8	-1.58	0.0575	986	0.983	0.942	16944	0.997
TRDMT1	-5.15	8	-1.58	0.0575	987	0.983	0.942	16943	0.997
GDF11	-5.15	8	-1.58	0.0576	988	0.983	0.942	16942	0.997
DENND6B	-5.15	8	-1.58	0.0576	989	0.983	0.942	16941	0.997
NDUFA13	-5.14	8	-1.57	0.0578	990	0.983	0.942	16940	0.997
EMILIN2	-5.14	8	-1.57	0.0578	991	0.983	0.942	16939	0.997
2021-12-01	-5.14	8	-1.57	0.0578	992	0.983	0.942	16938	0.997
YY1	-5.14	8	-1.57	0.0579	993	0.983	0.942	16937	0.997
PSMC3	-5.14	8	-1.57	0.0579	994	0.983	0.942	16936	0.997
DAP3	-5.14	8	-1.57	0.058	995	0.983	0.942	16935	0.997
EFNB1	-5.14	8	-1.57	0.058	996	0.983	0.942	16934	0.997
MEA1	-5.14	8	-1.57	0.058	997	0.983	0.942	16933	0.997
HDX	-5.13	8	-1.57	0.0582	998	0.983	0.942	16932	0.997
MSH4	-5.13	8	-1.57	0.0582	999	0.983	0.942	16931	0.997
MKI67IP	-4.44	6	-1.57	0.0582	1000	0.983	0.942	16930	0.997
TXNRD3	-5.13	8	-1.57	0.0582	1001	0.983	0.942	16929	0.997
PET100	-5.13	8	-1.57	0.0585	1002	0.983	0.942	16928	0.997
ZFX	-5.12	8	-1.57	0.0585	1003	0.983	0.942	16927	0.997
CTSS	-5.12	8	-1.57	0.0585	1004	0.983	0.942	16926	0.997
ETF1	-5.12	8	-1.57	0.0586	1005	0.983	0.941	16925	0.997
SRP9	-5.12	8	-1.57	0.0586	1006	0.983	0.941	16924	0.997
GORASP1	-5.12	8	-1.57	0.0586	1007	0.983	0.941	16923	0.997
ATXN7	-5.12	8	-1.57	0.0586	1008	0.983	0.941	16922	0.997
ARPC5	-5.12	8	-1.57	0.0587	1009	0.983	0.941	16921	0.997
DNMT3B	-5.12	8	-1.57	0.0587	1010	0.983	0.941	16920	0.997
HRNR	-5.12	8	-1.57	0.0587	1011	0.983	0.941	16919	0.997
FCGR2A	-5.12	8	-1.57	0.0587	1012	0.983	0.941	16918	0.997
CES2	-5.12	8	-1.57	0.0587	1013	0.983	0.941	16917	0.997
BCAT2	-5.12	8	-1.56	0.0588	1014	0.983	0.941	16916	0.997
ID3	-5.11	8	-1.56	0.0589	1015	0.983	0.941	16915	0.997
DDX39B	-5.11	8	-1.56	0.0589	1016	0.983	0.941	16914	0.997
AAMP	-5.11	8	-1.56	0.059	1017	0.983	0.941	16913	0.997
METTL17	-5.1	8	-1.56	0.0593	1018	0.983	0.941	16912	0.997
RPP21	-5.1	8	-1.56	0.0594	1019	0.983	0.941	16911	0.997
KTI12	-5.1	8	-1.56	0.0594	1020	0.983	0.941	16910	0.997
USP30	-5.1	8	-1.56	0.0596	1021	0.983	0.94	16909	0.997
FAM8A1	-5.09	8	-1.56	0.0597	1022	0.983	0.94	16908	0.997
CYP2W1	-5.09	8	-1.56	0.0597	1023	0.983	0.94	16907	0.997
CBX2	-5.09	8	-1.56	0.0598	1024	0.983	0.94	16906	0.997
PBX2	-5.09	8	-1.56	0.0598	1025	0.983	0.94	16905	0.997
PLXNA1	-5.09	8	-1.56	0.0599	1026	0.983	0.94	16904	0.997
ZMYM4	-5.09	8	-1.56	0.0599	1027	0.983	0.94	16903	0.997
HTR3B	-5.09	8	-1.56	0.0599	1028	0.983	0.94	16902	0.997
FAM161B	-5.09	8	-1.55	0.06	1029	0.983	0.94	16901	0.997
FAM198A	-5.09	8	-1.55	0.06	1030	0.983	0.94	16900	0.997
DDAH2	-5.08	8	-1.55	0.0601	1031	0.983	0.94	16899	0.997
ERLIN1	-5.08	8	-1.55	0.0602	1032	0.983	0.94	16898	0.997
MRPL51	-5.08	8	-1.55	0.0603	1033	0.983	0.94	16897	0.997
CHCHD7	-5.07	8	-1.55	0.0604	1034	0.983	0.94	16896	0.997
NHLRC4	-5.07	8	-1.55	0.0605	1035	0.983	0.939	16895	0.997
DNTTIP2	-5.07	8	-1.55	0.0606	1036	0.983	0.939	16894	0.997
FAM187B	-5.07	8	-1.55	0.0606	1037	0.983	0.939	16893	0.997
HYOU1	-5.07	8	-1.55	0.0606	1038	0.983	0.939	16892	0.997
KLF1	-5.07	8	-1.55	0.0607	1039	0.983	0.939	16891	0.997
EGFL8	-5.07	8	-1.55	0.0607	1040	0.983	0.939	16890	0.997
TMEM170B	-5.07	8	-1.55	0.0607	1041	0.983	0.939	16889	0.997
DMP1	-5.06	8	-1.55	0.0608	1042	0.983	0.939	16888	0.997
TMEM66	-5.06	8	-1.55	0.0609	1043	0.983	0.939	16887	0.997
S100A5	-5.06	8	-1.55	0.061	1044	0.983	0.939	16886	0.997
A3GALT2	-5.06	8	-1.55	0.0611	1045	0.983	0.939	16885	0.997
INO80	-5.06	8	-1.55	0.0611	1046	0.983	0.939	16884	0.997
PRSS56	-5.06	8	-1.55	0.0612	1047	0.983	0.939	16883	0.997
NFE2L2	-5.05	8	-1.54	0.0612	1048	0.983	0.939	16882	0.997
RNF214	-5.05	8	-1.54	0.0613	1049	0.983	0.939	16881	0.997
PAPSS1	-5.05	8	-1.54	0.0614	1050	0.983	0.939	16880	0.997
MMP23B	-5.05	8	-1.54	0.0614	1051	0.983	0.939	16879	0.997
NARF	-5.05	8	-1.54	0.0614	1052	0.983	0.939	16878	0.997
GPC3	-5.04	8	-1.54	0.0616	1053	0.983	0.938	16877	0.997
APH1A	-5.04	8	-1.54	0.0618	1054	0.983	0.938	16876	0.997
SLC39A3	-5.04	8	-1.54	0.0618	1055	0.983	0.938	16875	0.997
C8orf59	-2.52	2	-1.54	0.062	1056	0.983	0.938	16874	0.997
NPR3	-5.03	8	-1.54	0.062	1057	0.983	0.938	16873	0.997
CENPP	-5.03	8	-1.54	0.062	1058	0.983	0.938	16872	0.997
NRTN	-5.03	8	-1.54	0.0621	1059	0.983	0.938	16871	0.997
HIST1H2BK	-4.36	6	-1.54	0.0622	1060	0.983	0.938	16870	0.997
AP3M1	-5.03	8	-1.54	0.0623	1061	0.983	0.938	16869	0.997
GPR139	-5.02	8	-1.54	0.0624	1062	0.983	0.938	16868	0.997
TMEM255A	-5.02	8	-1.53	0.0625	1063	0.983	0.938	16867	0.997
CSMD2	-5.02	8	-1.53	0.0625	1064	0.983	0.937	16866	0.997
FAM109B	-4.35	6	-1.53	0.0626	1065	0.983	0.937	16865	0.997
AP1G2	-5.02	8	-1.53	0.0627	1066	0.983	0.937	16864	0.996
MAGEL2	-5.02	8	-1.53	0.0627	1067	0.983	0.937	16863	0.996
EBF4	-5.02	8	-1.53	0.0627	1068	0.983	0.937	16862	0.996
AK9	-5.01	8	-1.53	0.0628	1069	0.983	0.937	16861	0.996
CPA1	-5.01	8	-1.53	0.0628	1070	0.983	0.937	16860	0.996
TMEM240	-4.34	6	-1.53	0.0628	1071	0.983	0.937	16859	0.996
CYP19A1	-5.01	8	-1.53	0.0629	1072	0.983	0.937	16858	0.996
COMTD1	-5.01	8	-1.53	0.0629	1073	0.983	0.937	16857	0.996
ADC	-5.01	8	-1.53	0.0631	1074	0.983	0.937	16856	0.996
UNG	-5.01	8	-1.53	0.0631	1075	0.983	0.937	16855	0.996
CYP7B1	-5	8	-1.53	0.0633	1076	0.983	0.937	16854	0.996
KIAA1239	-4.68	7	-1.53	0.0634	1077	0.983	0.937	16853	0.996
EVA1B	-5	8	-1.53	0.0635	1078	0.983	0.936	16852	0.996
MAGEB3	-4.99	8	-1.53	0.0636	1079	0.983	0.936	16851	0.996
RAD21	-4.99	8	-1.53	0.0636	1080	0.983	0.936	16850	0.996
RPL4	-4.99	8	-1.53	0.0636	1081	0.983	0.936	16849	0.996
VCAN	-4.99	8	-1.52	0.0637	1082	0.983	0.936	16848	0.996
PRG3	-4.99	8	-1.52	0.0638	1083	0.983	0.936	16847	0.996
HEPACAM2	-4.99	8	-1.52	0.0638	1084	0.983	0.936	16846	0.996
TFG	-4.99	8	-1.52	0.0639	1085	0.983	0.936	16845	0.996
UNC5B	-4.99	8	-1.52	0.0639	1086	0.983	0.936	16844	0.996
VLDLR	-4.99	8	-1.52	0.0639	1087	0.983	0.936	16843	0.996
IMPACT	-4.99	8	-1.52	0.0639	1088	0.983	0.936	16842	0.996
TXNDC11	-4.99	8	-1.52	0.0639	1089	0.983	0.936	16841	0.996
KCNJ9	-4.99	8	-1.52	0.0639	1090	0.983	0.936	16840	0.996
BROX	-4.98	8	-1.52	0.0639	1091	0.983	0.936	16839	0.996
USP5	-4.98	8	-1.52	0.064	1092	0.983	0.936	16838	0.996
USP27X	-4.98	8	-1.52	0.0641	1093	0.983	0.936	16837	0.996
NHLH2	-4.98	8	-1.52	0.0641	1094	0.983	0.936	16836	0.996
LAMTOR2	-4.98	8	-1.52	0.0643	1095	0.983	0.936	16835	0.996
PNRC2	-4.97	8	-1.52	0.0644	1096	0.983	0.936	16834	0.996
FPR1	-4.97	8	-1.52	0.0645	1097	0.983	0.935	16833	0.996
KIT	-4.97	8	-1.52	0.0646	1098	0.983	0.935	16832	0.996
ZNF683	-4.97	8	-1.52	0.0646	1099	0.983	0.935	16831	0.996
MIA3	-4.97	8	-1.52	0.0647	1100	0.983	0.935	16830	0.996
IL17RA	-4.97	8	-1.52	0.0647	1101	0.983	0.935	16829	0.996
SLC26A6	-4.96	8	-1.52	0.0648	1102	0.983	0.935	16828	0.996
SYPL2	-4.96	8	-1.52	0.0648	1103	0.983	0.935	16827	0.996
DTD2	-4.96	8	-1.51	0.0649	1104	0.983	0.935	16826	0.996
RAC1	-4.96	8	-1.51	0.0649	1105	0.983	0.935	16825	0.996
ANKRD13A	-4.96	8	-1.51	0.0649	1106	0.983	0.935	16824	0.996
CSRP1	-4.96	8	-1.51	0.065	1107	0.983	0.935	16823	0.996
PHTF1	-4.96	8	-1.51	0.0651	1108	0.983	0.935	16822	0.996
ARHGAP28	-4.95	8	-1.51	0.0652	1109	0.983	0.935	16821	0.996
SLBP	-4.95	8	-1.51	0.0652	1110	0.983	0.935	16820	0.996
SYT6	-4.95	8	-1.51	0.0652	1111	0.983	0.935	16819	0.996
KIAA0586	-4.95	8	-1.51	0.0652	1112	0.983	0.935	16818	0.996
ANO4	-4.95	8	-1.51	0.0652	1113	0.983	0.935	16817	0.996
RPA1	-4.95	8	-1.51	0.0653	1114	0.983	0.935	16816	0.996
AKT3	-4.95	8	-1.51	0.0654	1115	0.983	0.935	16815	0.996
LRP11	-4.95	8	-1.51	0.0655	1116	0.983	0.934	16814	0.996
LRRC1	-4.94	8	-1.51	0.0656	1117	0.983	0.934	16813	0.996
STAC3	-4.94	8	-1.51	0.0656	1118	0.983	0.934	16812	0.996
RPS29	-3.49	4	-1.51	0.0657	1119	0.983	0.934	16811	0.996
LCE4A	-4.28	6	-1.51	0.0657	1120	0.983	0.934	16810	0.996
LHFPL4	-4.94	8	-1.51	0.0658	1121	0.983	0.934	16809	0.996
PLCZ1	-4.94	8	-1.51	0.0658	1122	0.983	0.934	16808	0.996
C1orf74	-4.94	8	-1.51	0.0659	1123	0.983	0.934	16807	0.996
SLITRK6	-4.93	8	-1.51	0.066	1124	0.983	0.934	16806	0.996
TRIB3	-4.93	8	-1.51	0.0661	1125	0.983	0.934	16805	0.996
NFAM1	-4.93	8	-1.5	0.0662	1126	0.983	0.934	16804	0.996
OR4D9	-4.93	8	-1.5	0.0662	1127	0.983	0.934	16803	0.996
TUSC2	-4.93	8	-1.5	0.0663	1128	0.983	0.934	16802	0.996
ZNF776	-4.92	8	-1.5	0.0666	1129	0.983	0.933	16801	0.996
HEG1	-4.92	8	-1.5	0.0667	1130	0.983	0.933	16800	0.996
ZNF57	-4.91	8	-1.5	0.0668	1131	0.983	0.933	16799	0.996
TRIM42	-4.91	8	-1.5	0.0669	1132	0.983	0.933	16798	0.996
EGLN3	-4.91	8	-1.5	0.0669	1133	0.983	0.933	16797	0.996
TRIM11	-4.91	8	-1.5	0.067	1134	0.983	0.933	16796	0.996
SLC35F2	-4.91	8	-1.5	0.067	1135	0.983	0.933	16795	0.996
H1FX	-4.91	8	-1.5	0.067	1136	0.983	0.933	16794	0.996
GNRH1	-4.91	8	-1.5	0.0672	1137	0.983	0.933	16793	0.996
AGR3	-4.9	8	-1.5	0.0673	1138	0.983	0.933	16792	0.996
MYH14	-4.9	8	-1.5	0.0673	1139	0.983	0.933	16791	0.996
IQCH	-4.9	8	-1.5	0.0673	1140	0.983	0.933	16790	0.996
TUBA4A	-4.9	8	-1.5	0.0674	1141	0.983	0.933	16789	0.996
PIGT	-4.9	8	-1.5	0.0674	1142	0.983	0.933	16788	0.996
NYX	-4.9	8	-1.49	0.0675	1143	0.983	0.933	16787	0.996
NUP54	-4.9	8	-1.49	0.0675	1144	0.983	0.932	16786	0.996
CD27	-4.9	8	-1.49	0.0675	1145	0.983	0.932	16785	0.996
VWA9	-4.89	8	-1.49	0.0677	1146	0.983	0.932	16784	0.996
OSBPL9	-4.89	8	-1.49	0.0677	1147	0.983	0.932	16783	0.996
PLXNA2	-4.89	8	-1.49	0.0677	1148	0.983	0.932	16782	0.996
FAM84B	-4.89	8	-1.49	0.0678	1149	0.983	0.932	16781	0.996
COTL1	-4.89	8	-1.49	0.0678	1150	0.983	0.932	16780	0.996
SLC22A13	-4.88	8	-1.49	0.0681	1151	0.983	0.932	16779	0.996
MMP14	-4.88	8	-1.49	0.0682	1152	0.983	0.932	16778	0.996
NUP107	-4.88	8	-1.49	0.0683	1153	0.983	0.932	16777	0.996
BRDT	-4.88	8	-1.49	0.0684	1154	0.983	0.932	16776	0.996
RBFOX2	-4.88	8	-1.49	0.0684	1155	0.983	0.932	16775	0.996
S100A7L2	-4.87	8	-1.49	0.0685	1156	0.983	0.932	16774	0.996
PAX1	-4.87	8	-1.49	0.0685	1157	0.983	0.932	16773	0.996
MSC	-4.87	8	-1.49	0.0686	1158	0.983	0.931	16772	0.996
ANKRD11	-4.87	8	-1.49	0.0686	1159	0.983	0.931	16771	0.996
KLHL25	-4.87	8	-1.49	0.0686	1160	0.983	0.931	16770	0.996
HBS1L	-4.87	8	-1.49	0.0686	1161	0.983	0.931	16769	0.996
MCUR1	-4.87	8	-1.49	0.0688	1162	0.983	0.931	16768	0.996
EIF3I	-4.87	8	-1.48	0.0688	1163	0.983	0.931	16767	0.996
C4orf32	-4.87	8	-1.48	0.0688	1164	0.983	0.931	16766	0.996
ZNF428	-4.87	8	-1.48	0.0688	1165	0.983	0.931	16765	0.996
EIF3D	-4.87	8	-1.48	0.0689	1166	0.983	0.931	16764	0.996
HABP2	-4.87	8	-1.48	0.0689	1167	0.983	0.931	16763	0.996
CLK1	-4.87	8	-1.48	0.0689	1168	0.983	0.931	16762	0.996
PPP1R35	-4.87	8	-1.48	0.0689	1169	0.983	0.931	16761	0.996
FANK1	-2.43	2	-1.48	0.069	1170	0.983	0.931	16760	0.996
P2RX2	-4.86	8	-1.48	0.069	1171	0.983	0.931	16759	0.996
DCLRE1B	-4.86	8	-1.48	0.069	1172	0.983	0.931	16758	0.996
EPHA3	-4.86	8	-1.48	0.0691	1173	0.983	0.931	16757	0.996
PTER	-4.86	8	-1.48	0.0692	1174	0.983	0.931	16756	0.996
PARP12	-4.86	8	-1.48	0.0693	1175	0.983	0.931	16755	0.996
ARNTL	-4.85	8	-1.48	0.0693	1176	0.983	0.931	16754	0.996
MAPKAPK2	-4.85	8	-1.48	0.0694	1177	0.983	0.931	16753	0.996
EBF2	-4.85	8	-1.48	0.0694	1178	0.983	0.931	16752	0.996
TBP	-4.85	8	-1.48	0.0695	1179	0.983	0.931	16751	0.996
CHCHD4	-4.85	8	-1.48	0.0695	1180	0.983	0.931	16750	0.996
ZMPSTE24	-4.85	8	-1.48	0.0696	1181	0.983	0.93	16749	0.996
CA2	-4.85	8	-1.48	0.0696	1182	0.983	0.93	16748	0.996
HIST1H2BM	-4.85	8	-1.48	0.0696	1183	0.983	0.93	16747	0.996
IL18RAP	-4.85	8	-1.48	0.0696	1184	0.983	0.93	16746	0.996
PDGFA	-4.85	8	-1.48	0.0696	1185	0.983	0.93	16745	0.996
C12orf73	-4.85	8	-1.48	0.0696	1186	0.983	0.93	16744	0.996
POLA2	-4.85	8	-1.48	0.0696	1187	0.983	0.93	16743	0.996
BANK1	-4.85	8	-1.48	0.0697	1188	0.983	0.93	16742	0.996
LIMCH1	-4.85	8	-1.48	0.0697	1189	0.983	0.93	16741	0.996
PLD4	-4.84	8	-1.48	0.0701	1190	0.983	0.93	16740	0.996
ZNF878	-2.42	2	-1.48	0.0701	1191	0.983	0.93	16739	0.996
TMEM140	-4.84	8	-1.48	0.0701	1192	0.983	0.93	16738	0.996
LIPT1	-4.84	8	-1.47	0.0701	1193	0.983	0.93	16737	0.996
TESK1	-4.84	8	-1.47	0.0701	1194	0.983	0.93	16736	0.996
C15orf38	-3.42	4	-1.47	0.0701	1195	0.983	0.93	16735	0.996
CKMT2	-4.83	8	-1.47	0.0702	1196	0.983	0.93	16734	0.996
DDX56	-4.83	8	-1.47	0.0703	1197	0.983	0.93	16733	0.996
OBFC1	-4.83	8	-1.47	0.0703	1198	0.983	0.93	16732	0.996
IZUMO1	-4.83	8	-1.47	0.0703	1199	0.983	0.93	16731	0.996
NONO	-4.83	8	-1.47	0.0706	1200	0.983	0.929	16730	0.996
OVGP1	-4.83	8	-1.47	0.0706	1201	0.983	0.929	16729	0.996
ARL5C	-4.83	8	-1.47	0.0706	1202	0.983	0.929	16728	0.996
ASH2L	-4.82	8	-1.47	0.0707	1203	0.983	0.929	16727	0.996
COL4A6	-4.82	8	-1.47	0.0708	1204	0.983	0.929	16726	0.996
DCAF6	-4.82	8	-1.47	0.0709	1205	0.983	0.929	16725	0.996
B4GALT2	-4.82	8	-1.47	0.0709	1206	0.983	0.929	16724	0.996
MSTN	-4.82	8	-1.47	0.0709	1207	0.983	0.929	16723	0.996
AP1G1	-4.82	8	-1.47	0.0709	1208	0.983	0.929	16722	0.996
C2orf62	-4.82	8	-1.47	0.071	1209	0.983	0.929	16721	0.996
GALNT2	-4.81	8	-1.47	0.0711	1210	0.983	0.929	16720	0.996
ZNF771	-4.81	8	-1.47	0.0711	1211	0.983	0.929	16719	0.996
NEDD8	-4.16	6	-1.47	0.0714	1212	0.983	0.929	16718	0.996
PSMD14	-4.8	8	-1.46	0.0719	1213	0.983	0.928	16717	0.995
XDH	-4.8	8	-1.46	0.0719	1214	0.983	0.928	16716	0.995
FAM103A1	-4.8	8	-1.46	0.0719	1215	0.983	0.928	16715	0.995
ABCC6	-4.8	8	-1.46	0.0719	1216	0.983	0.928	16714	0.995
DOC2B	-4.79	8	-1.46	0.072	1217	0.983	0.928	16713	0.995
MRPL15	-4.79	8	-1.46	0.072	1218	0.983	0.928	16712	0.995
ATP2B4	-4.79	8	-1.46	0.072	1219	0.983	0.928	16711	0.995
AC016757.3	-4.79	8	-1.46	0.072	1220	0.983	0.928	16710	0.995
MS4A10	-4.79	8	-1.46	0.0721	1221	0.983	0.928	16709	0.995
KRT1	-4.79	8	-1.46	0.0721	1222	0.983	0.928	16708	0.995
NID1	-4.79	8	-1.46	0.0722	1223	0.983	0.928	16707	0.995
C19orf38	-4.79	8	-1.46	0.0723	1224	0.983	0.928	16706	0.995
PPP1R14C	-4.78	8	-1.46	0.0725	1225	0.983	0.927	16705	0.995
CNTNAP4	-4.78	8	-1.46	0.0726	1226	0.983	0.927	16704	0.995
IP6K3	-4.78	8	-1.46	0.0726	1227	0.983	0.927	16703	0.995
FCGR1A	-4.78	8	-1.46	0.0726	1228	0.983	0.927	16702	0.995
IQCB1	-4.78	8	-1.46	0.0728	1229	0.983	0.927	16701	0.995
TAF7	-4.77	8	-1.45	0.0728	1230	0.983	0.927	16700	0.995
RHO	-4.77	8	-1.45	0.0729	1231	0.983	0.927	16699	0.995
JUNB	-4.77	8	-1.45	0.0729	1232	0.983	0.927	16698	0.995
DNAJA1	-4.77	8	-1.45	0.073	1233	0.983	0.927	16697	0.995
SPCS2	-4.77	8	-1.45	0.0731	1234	0.983	0.927	16696	0.995
LYPLAL1	-4.77	8	-1.45	0.0732	1235	0.983	0.927	16695	0.995
SLPI	-4.77	8	-1.45	0.0732	1236	0.983	0.927	16694	0.995
TEDDM1	-4.76	8	-1.45	0.0735	1237	0.983	0.927	16693	0.995
PTBP3	-4.76	8	-1.45	0.0735	1238	0.983	0.926	16692	0.995
ITGB7	-4.76	8	-1.45	0.0736	1239	0.983	0.926	16691	0.995
SEC62	-4.76	8	-1.45	0.0737	1240	0.983	0.926	16690	0.995
OR6A2	-4.76	8	-1.45	0.0737	1241	0.983	0.926	16689	0.995
PPP1R13L	-4.75	8	-1.45	0.0738	1242	0.983	0.926	16688	0.995
VPS28	-4.75	8	-1.45	0.0739	1243	0.983	0.926	16687	0.995
TAL1	-4.75	8	-1.45	0.0739	1244	0.983	0.926	16686	0.995
RUNX3	-4.75	8	-1.45	0.0739	1245	0.983	0.926	16685	0.995
TMEM131	-4.75	8	-1.45	0.074	1246	0.983	0.926	16684	0.995
CADM3	-4.75	8	-1.45	0.0741	1247	0.983	0.926	16683	0.995
PHPT1	-4.75	8	-1.45	0.0741	1248	0.983	0.926	16682	0.995
CHRND	-4.75	8	-1.45	0.0741	1249	0.983	0.926	16681	0.995
DCST2	-4.74	8	-1.45	0.0742	1250	0.983	0.926	16680	0.995
CABP7	-4.44	7	-1.44	0.0742	1251	0.983	0.926	16679	0.995
ADAMTSL2	-4.74	8	-1.44	0.0743	1252	0.983	0.926	16678	0.995
CDC20	-4.74	8	-1.44	0.0744	1253	0.983	0.926	16677	0.995
SLC12A5	-4.74	8	-1.44	0.0745	1254	0.983	0.925	16676	0.995
BMS1	-4.73	8	-1.44	0.0748	1255	0.983	0.925	16675	0.995
SPTBN5	-4.73	8	-1.44	0.0749	1256	0.983	0.925	16674	0.995
CNTLN	-4.73	8	-1.44	0.0749	1257	0.983	0.925	16673	0.995
CTSH	-4.09	6	-1.44	0.0749	1258	0.983	0.925	16672	0.995
MED7	-4.73	8	-1.44	0.075	1259	0.983	0.925	16671	0.995
SLC6A17	-4.73	8	-1.44	0.075	1260	0.983	0.925	16670	0.995
C2	-4.72	8	-1.44	0.0751	1261	0.983	0.925	16669	0.995
KPNA3	-4.72	8	-1.44	0.0752	1262	0.983	0.925	16668	0.995
PLEKHH1	-4.72	8	-1.44	0.0752	1263	0.983	0.925	16667	0.995
IL3	-4.72	8	-1.44	0.0753	1264	0.983	0.925	16666	0.995
BRD9	-4.72	8	-1.44	0.0753	1265	0.983	0.925	16665	0.995
CIRH1A	-4.72	8	-1.44	0.0753	1266	0.983	0.925	16664	0.995
LSMD1	-4.72	8	-1.44	0.0754	1267	0.983	0.925	16663	0.995
OR1L3	-4.71	8	-1.43	0.0757	1268	0.983	0.924	16662	0.995
RIOK1	-4.71	8	-1.43	0.0757	1269	0.983	0.924	16661	0.995
KIF4A	-4.71	8	-1.43	0.0758	1270	0.983	0.924	16660	0.995
CRABP2	-4.71	8	-1.43	0.0759	1271	0.983	0.924	16659	0.995
DMRTA2	-4.71	8	-1.43	0.0759	1272	0.983	0.924	16658	0.995
KBTBD11	-4.71	8	-1.43	0.0759	1273	0.983	0.924	16657	0.995
NDUFS6	-4.71	8	-1.43	0.0759	1274	0.983	0.924	16656	0.995
OR2B2	-4.71	8	-1.43	0.076	1275	0.983	0.924	16655	0.995
PABPC1	-4.71	8	-1.43	0.076	1276	0.983	0.924	16654	0.995
ATP6V0E2	-4.7	8	-1.43	0.076	1277	0.983	0.924	16653	0.995
NUAK2	-4.7	8	-1.43	0.0761	1278	0.983	0.924	16652	0.995
RNF219	-4.7	8	-1.43	0.0763	1279	0.983	0.924	16651	0.995
NPR1	-4.7	8	-1.43	0.0763	1280	0.983	0.924	16650	0.995
ISCU	-4.7	8	-1.43	0.0763	1281	0.983	0.924	16649	0.995
ELF4	-4.7	8	-1.43	0.0764	1282	0.983	0.924	16648	0.995
C2orf53	-4.7	8	-1.43	0.0764	1283	0.983	0.924	16647	0.995
S100A14	-4.7	8	-1.43	0.0764	1284	0.983	0.924	16646	0.995
CDC25A	-4.69	8	-1.43	0.0766	1285	0.983	0.923	16645	0.995
XRCC6BP1	-4.69	8	-1.43	0.0766	1286	0.983	0.923	16644	0.995
PSMA3	-4.69	8	-1.43	0.0768	1287	0.983	0.923	16643	0.995
TMEM132C	-4.69	8	-1.43	0.0768	1288	0.983	0.923	16642	0.995
PRUNE	-4.69	8	-1.43	0.0769	1289	0.983	0.923	16641	0.995
LIX1	-4.69	8	-1.43	0.0769	1290	0.983	0.923	16640	0.995
WNT5A	-4.69	8	-1.43	0.0769	1291	0.983	0.923	16639	0.995
ELOF1	-4.68	8	-1.43	0.0769	1292	0.983	0.923	16638	0.995
SLC32A1	-4.68	8	-1.43	0.077	1293	0.983	0.923	16637	0.995
AGFG2	-4.68	8	-1.43	0.0771	1294	0.983	0.923	16636	0.995
ZNRD1	-4.68	8	-1.43	0.0771	1295	0.983	0.923	16635	0.995
VMP1	-4.68	8	-1.43	0.0771	1296	0.983	0.923	16634	0.995
RIT1	-4.68	8	-1.42	0.0771	1297	0.983	0.923	16633	0.995
TRMT5	-4.68	8	-1.42	0.0771	1298	0.983	0.923	16632	0.995
CIC	-4.68	8	-1.42	0.0772	1299	0.983	0.923	16631	0.995
CLCN7	-4.68	8	-1.42	0.0773	1300	0.983	0.923	16630	0.995
RAN	-4.68	8	-1.42	0.0774	1301	0.983	0.923	16629	0.995
XKR8	-4.67	8	-1.42	0.0775	1302	0.983	0.923	16628	0.995
STX1A	-4.67	8	-1.42	0.0775	1303	0.983	0.922	16627	0.995
CCNT1	-4.67	8	-1.42	0.0775	1304	0.983	0.922	16626	0.995
ZG16	-4.67	8	-1.42	0.0777	1305	0.983	0.922	16625	0.995
FBXO21	-4.67	8	-1.42	0.0777	1306	0.983	0.922	16624	0.995
GPR26	-4.67	8	-1.42	0.0777	1307	0.983	0.922	16623	0.995
CYR61	-4.67	8	-1.42	0.0777	1308	0.983	0.922	16622	0.995
PRSS48	-4.67	8	-1.42	0.0777	1309	0.983	0.922	16621	0.995
IGF2BP2	-4.67	8	-1.42	0.0777	1310	0.983	0.922	16620	0.995
SLC16A8	-4.67	8	-1.42	0.0778	1311	0.983	0.922	16619	0.995
SLC25A44	-4.66	8	-1.42	0.0779	1312	0.983	0.922	16618	0.995
PCDHGC4	-4.66	8	-1.42	0.0779	1313	0.983	0.922	16617	0.995
DHX9	-4.66	8	-1.42	0.078	1314	0.983	0.922	16616	0.995
PLEKHG3	-4.66	8	-1.42	0.078	1315	0.983	0.922	16615	0.995
TIMM8A	-4.66	8	-1.42	0.078	1316	0.983	0.922	16614	0.995
DNAJC13	-4.66	8	-1.42	0.0781	1317	0.983	0.922	16613	0.995
PKHD1	-4.66	8	-1.42	0.0781	1318	0.983	0.922	16612	0.995
NPAS1	-4.66	8	-1.42	0.0781	1319	0.983	0.922	16611	0.995
SPRR4	-4.66	8	-1.42	0.0782	1320	0.983	0.922	16610	0.995
EIF4A1	-4.66	8	-1.42	0.0783	1321	0.983	0.922	16609	0.995
PRR5	-4.66	8	-1.42	0.0783	1322	0.983	0.922	16608	0.995
ANKIB1	-4.66	8	-1.42	0.0783	1323	0.983	0.922	16607	0.995
HENMT1	-4.65	8	-1.42	0.0785	1324	0.983	0.922	16606	0.995
C1orf145	-2.32	2	-1.41	0.0787	1325	0.983	0.921	16605	0.995
TRIM43	-4.65	8	-1.41	0.0787	1326	0.983	0.921	16604	0.995
VSIG8	-4.65	8	-1.41	0.0788	1327	0.983	0.921	16603	0.995
TWIST1	-4.64	8	-1.41	0.0789	1328	0.983	0.921	16602	0.995
TMEM89	-4.64	8	-1.41	0.0789	1329	0.983	0.921	16601	0.995
KCNJ5	-4.64	8	-1.41	0.079	1330	0.983	0.921	16600	0.995
TCEA2	-4.64	8	-1.41	0.0792	1331	0.983	0.921	16599	0.995
WDR24	-4.64	8	-1.41	0.0792	1332	0.983	0.921	16598	0.995
C6orf89	-4.64	8	-1.41	0.0793	1333	0.983	0.921	16597	0.995
ZMYND10	-4.64	8	-1.41	0.0793	1334	0.983	0.921	16596	0.995
MAB21L1	-4.63	8	-1.41	0.0793	1335	0.983	0.921	16595	0.995
MSH6	-4.63	8	-1.41	0.0796	1336	0.983	0.92	16594	0.994
AUNIP	-4.63	8	-1.41	0.0796	1337	0.983	0.92	16593	0.994
EIF2B1	-4.62	8	-1.41	0.0799	1338	0.983	0.92	16592	0.994
MON1A	-4.62	8	-1.41	0.0799	1339	0.983	0.92	16591	0.994
TM4SF4	-4.62	8	-1.41	0.0799	1340	0.983	0.92	16590	0.994
TCP1	-4.62	8	-1.41	0.0799	1341	0.983	0.92	16589	0.994
MORN3	-4.62	8	-1.41	0.0799	1342	0.983	0.92	16588	0.994
TRIP10	-4.62	8	-1.41	0.08	1343	0.983	0.92	16587	0.994
AGAP2	-4.62	8	-1.4	0.0801	1344	0.983	0.92	16586	0.994
FAM3A	-4.61	8	-1.4	0.0802	1345	0.983	0.92	16585	0.994
CCR7	-4.61	8	-1.4	0.0802	1346	0.983	0.92	16584	0.994
EPM2AIP1	-4.61	8	-1.4	0.0803	1347	0.983	0.92	16583	0.994
FBXO46	-4.61	8	-1.4	0.0804	1348	0.983	0.92	16582	0.994
ZNF768	-4.61	8	-1.4	0.0804	1349	0.983	0.92	16581	0.994
IL17RB	-4.61	8	-1.4	0.0805	1350	0.983	0.92	16580	0.994
RBM20	-4.61	8	-1.4	0.0805	1351	0.983	0.919	16579	0.994
TMC7	-4.61	8	-1.4	0.0806	1352	0.983	0.919	16578	0.994
CDK2	-4.61	8	-1.4	0.0807	1353	0.983	0.919	16577	0.994
ZKSCAN5	-4.6	8	-1.4	0.081	1354	0.983	0.919	16576	0.994
ACTR5	-4.6	8	-1.4	0.081	1355	0.983	0.919	16575	0.994
DSCAM	-4.6	8	-1.4	0.0812	1356	0.983	0.919	16574	0.994
KRT2	-4.59	8	-1.4	0.0812	1357	0.983	0.919	16573	0.994
C19orf26	-4.59	8	-1.4	0.0813	1358	0.983	0.919	16572	0.994
CSTA	-3.98	6	-1.4	0.0813	1359	0.983	0.919	16571	0.994
CD40LG	-4.59	8	-1.4	0.0813	1360	0.983	0.919	16570	0.994
TP53I3	-4.59	8	-1.4	0.0813	1361	0.983	0.919	16569	0.994
C18orf8	-4.59	8	-1.4	0.0814	1362	0.983	0.919	16568	0.994
SLC26A3	-4.59	8	-1.4	0.0814	1363	0.983	0.919	16567	0.994
PEX7	-4.59	8	-1.4	0.0814	1364	0.983	0.919	16566	0.994
OCSTAMP	-4.59	8	-1.39	0.0815	1365	0.983	0.918	16565	0.994
TBXA2R	-4.59	8	-1.39	0.0817	1366	0.983	0.918	16564	0.994
ATP2A1	-4.58	8	-1.39	0.0817	1367	0.983	0.918	16563	0.994
POU1F1	-4.58	8	-1.39	0.0818	1368	0.983	0.918	16562	0.994
ASPH	-4.58	8	-1.39	0.0818	1369	0.983	0.918	16561	0.994
PSMD3	-4.58	8	-1.39	0.0818	1370	0.983	0.918	16560	0.994
WDR53	-4.58	8	-1.39	0.0818	1371	0.983	0.918	16559	0.994
FMO2	-4.58	8	-1.39	0.0818	1372	0.983	0.918	16558	0.994
QARS	-4.58	8	-1.39	0.0818	1373	0.983	0.918	16557	0.994
RABL5	-4.58	8	-1.39	0.0819	1374	0.983	0.918	16556	0.994
TSPAN19	-4.58	8	-1.39	0.082	1375	0.983	0.918	16555	0.994
SPATS1	-4.58	8	-1.39	0.082	1376	0.983	0.918	16554	0.994
CLCNKA	-4.58	8	-1.39	0.082	1377	0.983	0.918	16553	0.994
LRRC8C	-4.58	8	-1.39	0.0821	1378	0.983	0.918	16552	0.994
TRIP6	-4.57	8	-1.39	0.0822	1379	0.983	0.918	16551	0.994
NARS	-4.57	8	-1.39	0.0823	1380	0.983	0.918	16550	0.994
WDR31	-4.57	8	-1.39	0.0823	1381	0.983	0.918	16549	0.994
HSF4	-4.57	8	-1.39	0.0824	1382	0.983	0.918	16548	0.994
PYGO1	-4.57	8	-1.39	0.0824	1383	0.983	0.918	16547	0.994
NUMBL	-4.57	8	-1.39	0.0825	1384	0.983	0.918	16546	0.994
ALYREF	-4.57	8	-1.39	0.0825	1385	0.983	0.918	16545	0.994
TMIGD2	-4.57	8	-1.39	0.0825	1386	0.983	0.917	16544	0.994
HIST3H2A	-4.56	8	-1.39	0.0827	1387	0.983	0.917	16543	0.994
ZNF697	-4.56	8	-1.39	0.0827	1388	0.983	0.917	16542	0.994
SCP2	-4.56	8	-1.39	0.0827	1389	0.983	0.917	16541	0.994
CREBL2	-4.56	8	-1.39	0.0827	1390	0.983	0.917	16540	0.994
ECEL1	-4.56	8	-1.39	0.0829	1391	0.983	0.917	16539	0.994
HSPBP1	-4.56	8	-1.39	0.0829	1392	0.983	0.917	16538	0.994
RPS4X	-2.28	2	-1.39	0.0829	1393	0.983	0.917	16537	0.994
PSMB8	-4.56	8	-1.38	0.0831	1394	0.983	0.917	16536	0.994
CHPT1	-4.55	8	-1.38	0.0832	1395	0.983	0.917	16535	0.994
PCLO	-4.55	8	-1.38	0.0832	1396	0.983	0.917	16534	0.994
FRMD1	-4.55	8	-1.38	0.0833	1397	0.983	0.917	16533	0.994
BRD4	-4.55	8	-1.38	0.0833	1398	0.983	0.917	16532	0.994
USP32	-4.55	8	-1.38	0.0836	1399	0.983	0.916	16531	0.994
PNPLA3	-4.55	8	-1.38	0.0836	1400	0.983	0.916	16530	0.994
GATAD2B	-4.54	8	-1.38	0.0836	1401	0.983	0.916	16529	0.994
PGRMC1	-4.54	8	-1.38	0.0837	1402	0.983	0.916	16528	0.994
SEC11A	-4.54	8	-1.38	0.0837	1403	0.983	0.916	16527	0.994
CD1B	-4.54	8	-1.38	0.0837	1404	0.983	0.916	16526	0.994
FKBP3	-4.54	8	-1.38	0.0837	1405	0.983	0.916	16525	0.994
WWTR1	-4.54	8	-1.38	0.0839	1406	0.983	0.916	16524	0.994
ARMS2	-4.54	8	-1.38	0.0839	1407	0.983	0.916	16523	0.994
CLCA1	-4.54	8	-1.38	0.084	1408	0.983	0.916	16522	0.994
NHLRC3	-4.54	8	-1.38	0.084	1409	0.983	0.916	16521	0.994
RPF1	-4.54	8	-1.38	0.0841	1410	0.983	0.916	16520	0.994
OGDH	-4.54	8	-1.38	0.0841	1411	0.983	0.916	16519	0.994
OR2AJ1	-4.54	8	-1.38	0.0841	1412	0.983	0.916	16518	0.994
S100A9	-4.53	8	-1.38	0.0842	1413	0.983	0.916	16517	0.994
DOCK4	-4.53	8	-1.38	0.0843	1414	0.983	0.916	16516	0.994
TMPPE	-4.24	7	-1.38	0.0843	1415	0.983	0.916	16515	0.994
LAMP1	-4.53	8	-1.38	0.0844	1416	0.983	0.916	16514	0.994
MYC	-4.53	8	-1.38	0.0845	1417	0.983	0.915	16513	0.994
MIER1	-4.53	8	-1.38	0.0846	1418	0.983	0.915	16512	0.994
AKIRIN2	-4.52	8	-1.37	0.0849	1419	0.983	0.915	16511	0.994
NRBP1	-4.51	8	-1.37	0.0852	1420	0.983	0.915	16510	0.993
HSD17B12	-4.51	8	-1.37	0.0854	1421	0.983	0.915	16509	0.993
CASC5	-4.51	8	-1.37	0.0854	1422	0.983	0.915	16508	0.993
RWDD2A	-4.51	8	-1.37	0.0855	1423	0.983	0.915	16507	0.993
CIDEC	-4.51	8	-1.37	0.0855	1424	0.983	0.914	16506	0.993
CDH11	-4.51	8	-1.37	0.0855	1425	0.983	0.914	16505	0.993
GPR56	-4.51	8	-1.37	0.0856	1426	0.983	0.914	16504	0.993
NUDT17	-4.5	8	-1.37	0.0857	1427	0.983	0.914	16503	0.993
ARL2BP	-3.18	4	-1.37	0.0858	1428	0.983	0.914	16502	0.993
CKS2	-4.5	8	-1.37	0.0858	1429	0.983	0.914	16501	0.993
PRMT6	-4.5	8	-1.37	0.0858	1430	0.983	0.914	16500	0.993
SLC25A36	-4.5	8	-1.37	0.0859	1431	0.983	0.914	16499	0.993
NID2	-4.5	8	-1.37	0.086	1432	0.983	0.914	16498	0.993
COL8A2	-4.5	8	-1.37	0.0861	1433	0.983	0.914	16497	0.993
VCL	-4.5	8	-1.36	0.0861	1434	0.983	0.914	16496	0.993
SESN1	-4.49	8	-1.36	0.0862	1435	0.983	0.914	16495	0.993
COG2	-4.49	8	-1.36	0.0863	1436	0.983	0.914	16494	0.993
PRKCG	-4.49	8	-1.36	0.0864	1437	0.983	0.914	16493	0.993
ALDH5A1	-4.49	8	-1.36	0.0864	1438	0.983	0.914	16492	0.993
MRPL3	-4.49	8	-1.36	0.0864	1439	0.983	0.914	16491	0.993
WLS	-4.49	8	-1.36	0.0865	1440	0.983	0.914	16490	0.993
HSD17B8	-4.49	8	-1.36	0.0866	1441	0.983	0.913	16489	0.993
RPP38	-4.48	8	-1.36	0.087	1442	0.983	0.913	16488	0.993
NDST2	-4.48	8	-1.36	0.087	1443	0.983	0.913	16487	0.993
RUVBL1	-4.47	8	-1.36	0.0872	1444	0.983	0.913	16486	0.993
TUBA8	-4.47	8	-1.36	0.0872	1445	0.983	0.913	16485	0.993
ILDR2	-4.47	8	-1.36	0.0873	1446	0.983	0.913	16484	0.993
CARM1	-4.47	8	-1.36	0.0873	1447	0.983	0.913	16483	0.993
SAP30	-4.47	8	-1.36	0.0874	1448	0.983	0.913	16482	0.993
CDC27	-4.47	8	-1.36	0.0874	1449	0.983	0.913	16481	0.993
COL6A6	-4.47	8	-1.36	0.0875	1450	0.983	0.912	16480	0.993
PZP	-4.47	8	-1.36	0.0876	1451	0.983	0.912	16479	0.993
CELF5	-4.46	8	-1.35	0.0877	1452	0.983	0.912	16478	0.993
CPN2	-4.46	8	-1.35	0.0878	1453	0.983	0.912	16477	0.993
CCR2	-4.46	8	-1.35	0.0879	1454	0.983	0.912	16476	0.993
HTR1F	-4.45	8	-1.35	0.0882	1455	0.983	0.912	16475	0.992
COG8	-4.45	8	-1.35	0.0883	1456	0.983	0.912	16474	0.992
IQCA1	-4.45	8	-1.35	0.0885	1457	0.983	0.912	16473	0.992
OR5AR1	-4.45	8	-1.35	0.0885	1458	0.983	0.911	16472	0.992
RPS6KC1	-4.45	8	-1.35	0.0885	1459	0.983	0.911	16471	0.992
RPS4Y2	-2.22	2	-1.35	0.0886	1460	0.983	0.911	16470	0.992
CAMK2G	-4.45	8	-1.35	0.0887	1461	0.983	0.911	16469	0.992
ACSF2	-4.44	8	-1.35	0.0887	1462	0.983	0.911	16468	0.992
IVL	-4.44	8	-1.35	0.0887	1463	0.983	0.911	16467	0.992
IL12RB1	-4.44	8	-1.35	0.0889	1464	0.983	0.911	16466	0.992
C4B	-2.22	2	-1.35	0.089	1465	0.983	0.911	16465	0.992
ZNF330	-4.44	8	-1.35	0.0891	1466	0.983	0.911	16464	0.992
CGRRF1	-4.44	8	-1.35	0.0891	1467	0.983	0.911	16463	0.992
FAM20A	-4.43	8	-1.34	0.0893	1468	0.983	0.911	16462	0.992
SLC25A23	-4.43	8	-1.34	0.0895	1469	0.983	0.911	16461	0.992
DLX3	-4.43	8	-1.34	0.0897	1470	0.983	0.91	16460	0.992
CPEB1	-4.43	8	-1.34	0.0897	1471	0.983	0.91	16459	0.992
ZNHIT3	-4.42	8	-1.34	0.0897	1472	0.983	0.91	16458	0.992
PSIP1	-4.42	8	-1.34	0.0899	1473	0.983	0.91	16457	0.992
IFNA5	-2.21	2	-1.34	0.0899	1474	0.983	0.91	16456	0.992
GLTP	-4.42	8	-1.34	0.09	1475	0.983	0.91	16455	0.992
C22orf24	-4.42	8	-1.34	0.09	1476	0.983	0.91	16454	0.992
SKA2	-4.42	8	-1.34	0.0901	1477	0.983	0.91	16453	0.992
UBA3	-4.42	8	-1.34	0.0901	1478	0.983	0.91	16452	0.992
TRIM39	-4.42	8	-1.34	0.0901	1479	0.983	0.91	16451	0.992
DENND4B	-4.42	8	-1.34	0.0901	1480	0.983	0.91	16450	0.992
AP1S2	-4.42	8	-1.34	0.0901	1481	0.983	0.91	16449	0.992
UHRF2	-4.42	8	-1.34	0.0902	1482	0.983	0.91	16448	0.992
PAG1	-4.42	8	-1.34	0.0902	1483	0.983	0.91	16447	0.992
PSME3	-4.41	8	-1.34	0.0903	1484	0.983	0.91	16446	0.992
OLAH	-4.41	8	-1.34	0.0904	1485	0.983	0.91	16445	0.992
YY2	-4.41	8	-1.34	0.0904	1486	0.983	0.91	16444	0.992
MEGF11	-4.41	8	-1.34	0.0905	1487	0.983	0.909	16443	0.992
NR1H4	-4.41	8	-1.34	0.0906	1488	0.983	0.909	16442	0.992
THOC7	-4.41	8	-1.34	0.0906	1489	0.983	0.909	16441	0.992
CTSC	-4.41	8	-1.34	0.0908	1490	0.983	0.909	16440	0.992
TCHH	-4.4	8	-1.34	0.0909	1491	0.983	0.909	16439	0.992
HSD3B2	-4.4	8	-1.34	0.0909	1492	0.983	0.909	16438	0.992
LRRC41	-4.4	8	-1.34	0.0909	1493	0.983	0.909	16437	0.992
ATF7	-4.4	8	-1.33	0.091	1494	0.983	0.909	16436	0.992
GATA3	-4.4	8	-1.33	0.091	1495	0.983	0.909	16435	0.992
GPR174	-4.4	8	-1.33	0.0911	1496	0.983	0.909	16434	0.992
LINGO1	-4.4	8	-1.33	0.0911	1497	0.983	0.909	16433	0.992
CHRNA4	-4.4	8	-1.33	0.0911	1498	0.983	0.909	16432	0.992
NOVA1	-4.4	8	-1.33	0.0911	1499	0.983	0.909	16431	0.992
C19orf71	-4.4	8	-1.33	0.0911	1500	0.983	0.909	16430	0.992
NDUFS7	-4.4	8	-1.33	0.0912	1501	0.983	0.909	16429	0.992
COX4I1	-4.4	8	-1.33	0.0912	1502	0.983	0.909	16428	0.992
ANP32B	-4.4	8	-1.33	0.0913	1503	0.983	0.909	16427	0.992
OIT3	-4.39	8	-1.33	0.0913	1504	0.983	0.909	16426	0.992
B3GNTL1	-4.39	8	-1.33	0.0914	1505	0.983	0.909	16425	0.992
LGALS8	-4.39	8	-1.33	0.0917	1506	0.983	0.908	16424	0.992
ALK	-4.39	8	-1.33	0.0917	1507	0.983	0.908	16423	0.992
IKBKAP	-4.39	8	-1.33	0.0917	1508	0.983	0.908	16422	0.992
ZNF257	-4.38	8	-1.33	0.0918	1509	0.983	0.908	16421	0.992
TUBB	-4.38	8	-1.33	0.0919	1510	0.983	0.908	16420	0.992
DIS3L	-4.38	8	-1.33	0.0919	1511	0.983	0.908	16419	0.992
GOT1L1	-4.38	8	-1.33	0.092	1512	0.983	0.908	16418	0.992
LAMTOR5	-4.38	8	-1.33	0.092	1513	0.983	0.908	16417	0.992
BUD13	-4.38	8	-1.33	0.0921	1514	0.983	0.908	16416	0.992
OAS3	-4.38	8	-1.33	0.0922	1515	0.983	0.908	16415	0.992
SLC27A5	-4.38	8	-1.33	0.0923	1516	0.983	0.908	16414	0.992
TMEM209	-4.37	8	-1.33	0.0924	1517	0.983	0.908	16413	0.991
CMC2	-2.19	2	-1.33	0.0925	1518	0.983	0.908	16412	0.991
CHSY1	-4.37	8	-1.32	0.0926	1519	0.983	0.907	16411	0.991
TIMP4	-4.37	8	-1.32	0.0926	1520	0.983	0.907	16410	0.991
BTBD3	-4.37	8	-1.32	0.0926	1521	0.983	0.907	16409	0.991
TMEM159	-4.37	8	-1.32	0.0927	1522	0.983	0.907	16408	0.991
WARS	-4.37	8	-1.32	0.0927	1523	0.983	0.907	16407	0.991
B3GALT4	-4.37	8	-1.32	0.0928	1524	0.983	0.907	16406	0.991
ZBTB11	-4.37	8	-1.32	0.0928	1525	0.983	0.907	16405	0.991
POLA1	-4.37	8	-1.32	0.0928	1526	0.983	0.907	16404	0.991
KCNN3	-4.37	8	-1.32	0.0928	1527	0.983	0.907	16403	0.991
TTC36	-4.36	8	-1.32	0.093	1528	0.983	0.907	16402	0.991
SIRT5	-4.36	8	-1.32	0.093	1529	0.983	0.907	16401	0.991
MBTD1	-4.36	8	-1.32	0.093	1530	0.983	0.907	16400	0.991
PAPLN	-4.36	8	-1.32	0.093	1531	0.983	0.907	16399	0.991
YWHAG	-4.36	8	-1.32	0.0932	1532	0.983	0.907	16398	0.991
FAM177B	-4.36	8	-1.32	0.0933	1533	0.983	0.907	16397	0.991
MUC13	-4.35	8	-1.32	0.0935	1534	0.983	0.907	16396	0.991
SLC9A2	-4.35	8	-1.32	0.0935	1535	0.983	0.906	16395	0.991
TMEM108	-4.35	8	-1.32	0.0935	1536	0.983	0.906	16394	0.991
PNPLA6	-4.35	8	-1.32	0.0938	1537	0.983	0.906	16393	0.991
PDCL2	-4.34	8	-1.32	0.094	1538	0.983	0.906	16392	0.991
C3orf22	-4.34	8	-1.32	0.094	1539	0.983	0.906	16391	0.991
DLGAP5	-4.34	8	-1.32	0.0941	1540	0.983	0.906	16390	0.991
RGPD2	-3.76	6	-1.32	0.0942	1541	0.983	0.906	16389	0.991
TMED2	-4.34	8	-1.31	0.0943	1542	0.983	0.906	16388	0.991
OAS1	-4.34	8	-1.31	0.0944	1543	0.983	0.906	16387	0.991
POLR3A	-4.34	8	-1.31	0.0944	1544	0.983	0.906	16386	0.991
GTF3C4	-3.76	6	-1.31	0.0944	1545	0.983	0.906	16385	0.991
SLC45A2	-4.33	8	-1.31	0.0945	1546	0.983	0.905	16384	0.991
SUCLG1	-4.33	8	-1.31	0.0946	1547	0.983	0.905	16383	0.991
DCP1B	-4.33	8	-1.31	0.0947	1548	0.983	0.905	16382	0.991
COPE	-4.33	8	-1.31	0.0947	1549	0.983	0.905	16381	0.991
CHIC1	-4.33	8	-1.31	0.0948	1550	0.983	0.905	16380	0.991
CDK8	-4.32	8	-1.31	0.095	1551	0.983	0.905	16379	0.991
LSM2	-4.32	8	-1.31	0.0952	1552	0.983	0.905	16378	0.991
SLC40A1	-4.32	8	-1.31	0.0952	1553	0.983	0.905	16377	0.991
TRMT61A	-4.32	8	-1.31	0.0952	1554	0.983	0.905	16376	0.991
AGRN	-4.32	8	-1.31	0.0953	1555	0.983	0.905	16375	0.991
HHLA3	-4.32	8	-1.31	0.0954	1556	0.983	0.905	16374	0.99
CHP2	-4.31	8	-1.31	0.0957	1557	0.983	0.904	16373	0.99
PRSS38	-4.31	8	-1.31	0.0957	1558	0.983	0.904	16372	0.99
ALG11	-4.31	8	-1.31	0.0957	1559	0.983	0.904	16371	0.99
CENPBD1	-4.31	8	-1.31	0.0958	1560	0.983	0.904	16370	0.99
PRRC2C	-4.31	8	-1.31	0.0959	1561	0.983	0.904	16369	0.99
HAUS6	-4.31	8	-1.3	0.096	1562	0.983	0.904	16368	0.99
MFSD6	-4.3	8	-1.3	0.0962	1563	0.983	0.904	16367	0.99
TREM1	-4.3	8	-1.3	0.0963	1564	0.983	0.904	16366	0.99
DXO	-4.3	8	-1.3	0.0963	1565	0.983	0.904	16365	0.99
XKR3	-4.3	8	-1.3	0.0963	1566	0.983	0.904	16364	0.99
WDR62	-4.3	8	-1.3	0.0965	1567	0.983	0.904	16363	0.99
PI4KA	-4.3	8	-1.3	0.0965	1568	0.983	0.903	16362	0.99
SECISBP2L	-4.3	8	-1.3	0.0966	1569	0.983	0.903	16361	0.99
AP3S2	-3.72	6	-1.3	0.0966	1570	0.983	0.903	16360	0.99
TMEM45A	-4.3	8	-1.3	0.0967	1571	0.983	0.903	16359	0.99
TRA2B	-4.3	8	-1.3	0.0967	1572	0.983	0.903	16358	0.99
DCAF4	-4.29	8	-1.3	0.0967	1573	0.983	0.903	16357	0.99
TREX1	-4.29	8	-1.3	0.0968	1574	0.983	0.903	16356	0.99
GOLGA2	-4.29	8	-1.3	0.0969	1575	0.983	0.903	16355	0.99
GTF2H3	-4.29	8	-1.3	0.097	1576	0.983	0.903	16354	0.99
TTK	-4.29	8	-1.3	0.0971	1577	0.983	0.903	16353	0.99
RD3	-4.29	8	-1.3	0.0971	1578	0.983	0.903	16352	0.99
ZNF473	-4.29	8	-1.3	0.0971	1579	0.983	0.903	16351	0.99
NSUN4	-4.29	8	-1.3	0.0971	1580	0.983	0.903	16350	0.99
ABCB7	-4.29	8	-1.3	0.0971	1581	0.983	0.903	16349	0.99
UBXN2B	-4.29	8	-1.3	0.0972	1582	0.983	0.903	16348	0.99
C20orf166	-4.28	8	-1.3	0.0973	1583	0.983	0.903	16347	0.99
PWWP2B	-4.28	8	-1.3	0.0975	1584	0.983	0.903	16346	0.99
NAV1	-4.28	8	-1.3	0.0975	1585	0.983	0.903	16345	0.99
USP11	-4.28	8	-1.3	0.0976	1586	0.983	0.902	16344	0.99
ZC3H12B	-4.28	8	-1.29	0.0977	1587	0.983	0.902	16343	0.99
RAB3B	-4.28	8	-1.29	0.0978	1588	0.983	0.902	16342	0.99
C1orf50	-4.27	8	-1.29	0.0978	1589	0.983	0.902	16341	0.99
RPS4Y1	-3.02	4	-1.29	0.0978	1590	0.983	0.902	16340	0.99
PLK1	-4.27	8	-1.29	0.0979	1591	0.983	0.902	16339	0.99
PPP1CC	-4.27	8	-1.29	0.098	1592	0.983	0.902	16338	0.99
COL7A1	-4.27	8	-1.29	0.0982	1593	0.983	0.902	16337	0.99
FAM222A	-4.27	8	-1.29	0.0982	1594	0.983	0.902	16336	0.99
HMX1	-4.27	8	-1.29	0.0983	1595	0.983	0.902	16335	0.99
CR2	-3.37	5	-1.29	0.0984	1596	0.983	0.902	16334	0.99
NDUFA6	-4.26	8	-1.29	0.0984	1597	0.983	0.902	16333	0.99
GADD45G	-4.26	8	-1.29	0.0984	1598	0.983	0.902	16332	0.99
DARS	-4.26	8	-1.29	0.0985	1599	0.983	0.901	16331	0.99
TIFA	-4.26	8	-1.29	0.0986	1600	0.983	0.901	16330	0.99
NR2C2AP	-4.26	8	-1.29	0.0987	1601	0.983	0.901	16329	0.99
KIF13A	-4.26	8	-1.29	0.0987	1602	0.983	0.901	16328	0.99
KIAA0020	-4.26	8	-1.29	0.0988	1603	0.983	0.901	16327	0.99
RPA2	-4.25	8	-1.29	0.0991	1604	0.983	0.901	16326	0.989
DNAJC19	-3.68	6	-1.29	0.0991	1605	0.983	0.901	16325	0.989
CHN2	-4.25	8	-1.29	0.0992	1606	0.983	0.901	16324	0.989
SGSH	-4.25	8	-1.29	0.0992	1607	0.983	0.901	16323	0.989
BEND5	-4.25	8	-1.29	0.0993	1608	0.983	0.901	16322	0.989
TXNRD2	-4.25	8	-1.28	0.0994	1609	0.983	0.901	16321	0.989
ABHD14B	-4.24	8	-1.28	0.0995	1610	0.983	0.9	16320	0.989
SFN	-4.24	8	-1.28	0.0998	1611	0.983	0.9	16319	0.989
POU5F2	-4.24	8	-1.28	0.0999	1612	0.983	0.9	16318	0.989
ERMAP	-3.96	7	-1.28	0.1	1613	0.983	0.9	16317	0.989
MRPL36	-4.23	8	-1.28	0.1	1614	0.983	0.9	16316	0.989
VTCN1	-4.23	8	-1.28	0.1	1615	0.983	0.9	16315	0.989
EPOR	-4.23	8	-1.28	0.1	1616	0.983	0.9	16314	0.989
GJA5	-4.23	8	-1.28	0.1	1617	0.983	0.9	16313	0.989
FANCD2OS	-4.23	8	-1.28	0.1	1618	0.983	0.9	16312	0.989
RABL6	-4.23	8	-1.28	0.1	1619	0.983	0.9	16311	0.989
UGT1A6	-4.23	8	-1.28	0.1	1620	0.983	0.9	16310	0.989
ETFA	-4.23	8	-1.28	0.101	1621	0.983	0.899	16309	0.989
MYRFL	-4.22	8	-1.28	0.101	1622	0.983	0.899	16308	0.989
GNL1	-4.22	8	-1.28	0.101	1623	0.983	0.899	16307	0.989
BTN3A1	-4.22	8	-1.28	0.101	1624	0.983	0.899	16306	0.989
LRRC2	-4.22	8	-1.28	0.101	1625	0.983	0.899	16305	0.989
FGR	-4.22	8	-1.28	0.101	1626	0.983	0.899	16304	0.989
RC3H1	-4.22	8	-1.28	0.101	1627	0.983	0.899	16303	0.989
CYP2C8	-4.21	8	-1.27	0.101	1628	0.983	0.899	16302	0.988
HHLA2	-4.21	8	-1.27	0.101	1629	0.983	0.899	16301	0.988
GABRA4	-4.21	8	-1.27	0.101	1630	0.983	0.899	16300	0.988
ATP6V0B	-4.21	8	-1.27	0.101	1631	0.983	0.899	16299	0.988
ACVR2B	-4.21	8	-1.27	0.101	1632	0.983	0.899	16298	0.988
CHRD	-4.21	8	-1.27	0.101	1633	0.983	0.899	16297	0.988
ASXL1	-4.21	8	-1.27	0.102	1634	0.983	0.898	16296	0.988
TUSC1	-4.21	8	-1.27	0.102	1635	0.983	0.898	16295	0.988
RBM19	-4.21	8	-1.27	0.102	1636	0.983	0.898	16294	0.988
RPS27A	-2.1	2	-1.27	0.102	1637	0.983	0.898	16293	0.988
NUPL1	-4.2	8	-1.27	0.102	1638	0.983	0.898	16292	0.988
OPN1LW	-2.1	2	-1.27	0.102	1639	0.983	0.898	16291	0.988
SCYL3	-4.2	8	-1.27	0.102	1640	0.983	0.898	16290	0.988
COL11A2	-4.2	8	-1.27	0.102	1641	0.983	0.898	16289	0.988
ALAD	-4.2	8	-1.27	0.102	1642	0.983	0.898	16288	0.988
NRL	-4.2	8	-1.27	0.102	1643	0.983	0.898	16287	0.988
EIF2B4	-4.19	8	-1.27	0.102	1644	0.983	0.898	16286	0.988
OPRD1	-4.19	8	-1.27	0.102	1645	0.983	0.898	16285	0.988
RGS7BP	-4.19	8	-1.27	0.102	1646	0.983	0.898	16284	0.988
TPM2	-4.19	8	-1.27	0.102	1647	0.983	0.898	16283	0.988
RPL41	-2.1	2	-1.27	0.102	1648	0.983	0.898	16282	0.988
ACVR1C	-4.19	8	-1.27	0.103	1649	0.983	0.897	16281	0.988
TMEM59L	-4.19	8	-1.27	0.103	1650	0.983	0.897	16280	0.988
KIF21A	-4.19	8	-1.27	0.103	1651	0.983	0.897	16279	0.988
TWF1	-4.19	8	-1.27	0.103	1652	0.983	0.897	16278	0.988
HTRA1	-4.19	8	-1.27	0.103	1653	0.983	0.897	16277	0.988
NMBR	-4.19	8	-1.27	0.103	1654	0.983	0.897	16276	0.988
GLRX5	-4.19	8	-1.27	0.103	1655	0.983	0.897	16275	0.988
APEH	-4.18	8	-1.27	0.103	1656	0.983	0.897	16274	0.988
SREK1IP1	-2.09	2	-1.26	0.103	1657	0.983	0.897	16273	0.988
PAPL	-4.18	8	-1.26	0.103	1658	0.983	0.897	16272	0.988
CXorf48	-4.18	8	-1.26	0.103	1659	0.983	0.897	16271	0.988
GPN3	-4.18	8	-1.26	0.103	1660	0.983	0.897	16270	0.988
CPT1C	-4.18	8	-1.26	0.103	1661	0.983	0.897	16269	0.988
EIF2S3	-4.18	8	-1.26	0.103	1662	0.983	0.897	16268	0.988
PRKCZ	-4.18	8	-1.26	0.103	1663	0.983	0.897	16267	0.988
NUP50	-4.18	8	-1.26	0.103	1664	0.983	0.897	16266	0.988
TES	-4.18	8	-1.26	0.103	1665	0.983	0.897	16265	0.988
MAGEE2	-4.18	8	-1.26	0.103	1666	0.983	0.897	16264	0.988
PACRG	-4.18	8	-1.26	0.103	1667	0.983	0.897	16263	0.988
ZBBX	-4.17	8	-1.26	0.103	1668	0.983	0.897	16262	0.988
WISP1	-4.17	8	-1.26	0.104	1669	0.983	0.896	16261	0.988
KCNE1	-4.17	8	-1.26	0.104	1670	0.983	0.896	16260	0.988
PHF5A	-3.61	6	-1.26	0.104	1671	0.983	0.896	16259	0.988
SF1	-4.17	8	-1.26	0.104	1672	0.983	0.896	16258	0.988
NUDT1	-4.17	8	-1.26	0.104	1673	0.983	0.896	16257	0.988
FOXM1	-4.17	8	-1.26	0.104	1674	0.983	0.896	16256	0.988
MFHAS1	-4.17	8	-1.26	0.104	1675	0.983	0.896	16255	0.988
SPHK2	-4.16	8	-1.26	0.104	1676	0.983	0.896	16254	0.988
TBL1XR1	-4.16	8	-1.26	0.104	1677	0.983	0.896	16253	0.988
TNFSF15	-4.16	8	-1.26	0.104	1678	0.983	0.896	16252	0.988
FAM132B	-4.16	8	-1.26	0.104	1679	0.983	0.896	16251	0.988
SLC16A1	-4.16	8	-1.26	0.104	1680	0.983	0.896	16250	0.988
GORAB	-4.16	8	-1.26	0.104	1681	0.983	0.896	16249	0.988
KRT6A	-2.94	4	-1.26	0.104	1682	0.983	0.896	16248	0.988
LSMEM2	-4.16	8	-1.26	0.105	1683	0.983	0.895	16247	0.988
EFCAB7	-4.16	8	-1.26	0.105	1684	0.983	0.895	16246	0.988
C9orf116	-4.15	8	-1.25	0.105	1685	0.983	0.895	16245	0.988
ECHDC2	-4.15	8	-1.25	0.105	1686	0.983	0.895	16244	0.988
TEX10	-4.15	8	-1.25	0.105	1687	0.983	0.895	16243	0.988
CSF1	-4.15	8	-1.25	0.105	1688	0.983	0.895	16242	0.988
IDH3A	-4.15	8	-1.25	0.105	1689	0.983	0.895	16241	0.988
MOSPD1	-4.15	8	-1.25	0.105	1690	0.983	0.895	16240	0.988
DIAPH2	-4.15	8	-1.25	0.105	1691	0.983	0.895	16239	0.988
CHRDL1	-4.15	8	-1.25	0.105	1692	0.983	0.895	16238	0.988
PCGF5	-4.15	8	-1.25	0.105	1693	0.983	0.895	16237	0.988
GABRD	-4.15	8	-1.25	0.105	1694	0.983	0.895	16236	0.988
FAM69C	-4.15	8	-1.25	0.105	1695	0.983	0.895	16235	0.988
DNAAF3	-4.15	8	-1.25	0.105	1696	0.983	0.895	16234	0.988
SP5	-4.14	8	-1.25	0.105	1697	0.983	0.895	16233	0.988
ANKRD28	-4.14	8	-1.25	0.105	1698	0.983	0.895	16232	0.988
SLC26A2	-4.14	8	-1.25	0.105	1699	0.983	0.895	16231	0.988
C17orf96	-4.14	8	-1.25	0.105	1700	0.983	0.895	16230	0.988
CFB	-4.14	8	-1.25	0.105	1701	0.983	0.895	16229	0.988
LRRC36	-4.14	8	-1.25	0.105	1702	0.983	0.895	16228	0.988
SMC3	-4.14	8	-1.25	0.106	1703	0.983	0.894	16227	0.988
RUNX2	-4.14	8	-1.25	0.106	1704	0.983	0.894	16226	0.988
UBA5	-4.14	8	-1.25	0.106	1705	0.983	0.894	16225	0.988
CNN3	-4.14	8	-1.25	0.106	1706	0.983	0.894	16224	0.988
METTL9	-4.14	8	-1.25	0.106	1707	0.983	0.894	16223	0.988
ZMAT1	-4.13	8	-1.25	0.106	1708	0.983	0.894	16222	0.988
HMOX2	-4.13	8	-1.25	0.106	1709	0.983	0.894	16221	0.988
NOP10	-4.13	8	-1.25	0.106	1710	0.983	0.894	16220	0.988
MTSS1	-4.13	8	-1.25	0.106	1711	0.983	0.894	16219	0.988
CYP7A1	-4.13	8	-1.25	0.106	1712	0.983	0.894	16218	0.988
SRF	-4.13	8	-1.25	0.106	1713	0.983	0.894	16217	0.988
PLA1A	-4.12	8	-1.25	0.106	1714	0.983	0.894	16216	0.988
EPHA10	-4.12	8	-1.25	0.106	1715	0.983	0.894	16215	0.988
SDE2	-4.12	8	-1.25	0.106	1716	0.983	0.894	16214	0.988
MRPL54	-4.12	8	-1.25	0.107	1717	0.983	0.893	16213	0.988
GUK1	-4.12	8	-1.24	0.107	1718	0.983	0.893	16212	0.988
HHAT	-4.12	8	-1.24	0.107	1719	0.983	0.893	16211	0.988
ABTB1	-4.12	8	-1.24	0.107	1720	0.983	0.893	16210	0.988
CAPN7	-4.12	8	-1.24	0.107	1721	0.983	0.893	16209	0.988
PLEKHB2	-4.12	8	-1.24	0.107	1722	0.983	0.893	16208	0.988
GEM	-4.12	8	-1.24	0.107	1723	0.983	0.893	16207	0.988
ARHGAP36	-4.11	8	-1.24	0.107	1724	0.983	0.893	16206	0.988
RNF183	-4.11	8	-1.24	0.107	1725	0.983	0.893	16205	0.988
NEXN	-4.11	8	-1.24	0.107	1726	0.983	0.893	16204	0.988
SH3BGRL3	-3.56	6	-1.24	0.107	1727	0.983	0.893	16203	0.988
SLC9A6	-4.1	8	-1.24	0.108	1728	0.983	0.892	16202	0.988
ZP2	-4.1	8	-1.24	0.108	1729	0.983	0.892	16201	0.988
PPIP5K1	-4.1	8	-1.24	0.108	1730	0.983	0.892	16200	0.988
SHANK2	-4.1	8	-1.24	0.108	1731	0.983	0.892	16199	0.988
GATAD2A	-4.1	8	-1.24	0.108	1732	0.983	0.892	16198	0.988
FAM133B	-2.05	2	-1.24	0.108	1733	0.983	0.892	16197	0.988
LIN7B	-4.1	8	-1.24	0.108	1734	0.983	0.892	16196	0.988
BFAR	-4.1	8	-1.24	0.108	1735	0.983	0.892	16195	0.988
CABP1	-3.55	6	-1.24	0.108	1736	0.983	0.892	16194	0.988
SLC12A4	-4.1	8	-1.24	0.108	1737	0.983	0.892	16193	0.988
GLYCTK	-4.1	8	-1.24	0.108	1738	0.983	0.892	16192	0.988
PLBD2	-4.09	8	-1.24	0.108	1739	0.983	0.892	16191	0.987
LANCL1	-4.09	8	-1.24	0.108	1740	0.983	0.892	16190	0.987
ZHX3	-4.09	8	-1.23	0.108	1741	0.983	0.892	16189	0.987
CALML5	-4.09	8	-1.23	0.108	1742	0.983	0.892	16188	0.987
NDUFS2	-4.09	8	-1.23	0.108	1743	0.983	0.892	16187	0.987
HYAL1	-4.09	8	-1.23	0.109	1744	0.983	0.891	16186	0.987
RAP1A	-4.09	8	-1.23	0.109	1745	0.983	0.891	16185	0.987
MOV10	-4.09	8	-1.23	0.109	1746	0.983	0.891	16184	0.987
CDCP1	-4.09	8	-1.23	0.109	1747	0.983	0.891	16183	0.987
DEFB113	-4.09	8	-1.23	0.109	1748	0.983	0.891	16182	0.987
CYP4Z1	-4.09	8	-1.23	0.109	1749	0.983	0.891	16181	0.987
HS6ST1	-4.08	8	-1.23	0.109	1750	0.983	0.891	16180	0.987
TSPYL6	-4.08	8	-1.23	0.109	1751	0.983	0.891	16179	0.987
PDHX	-4.08	8	-1.23	0.109	1752	0.983	0.891	16178	0.987
RAB14	-4.08	8	-1.23	0.109	1753	0.983	0.891	16177	0.987
COMMD3	-4.08	8	-1.23	0.109	1754	0.983	0.891	16176	0.987
WFDC11	-3.53	6	-1.23	0.109	1755	0.983	0.891	16175	0.987
EXPH5	-4.08	8	-1.23	0.109	1756	0.983	0.891	16174	0.987
NOL12	-4.08	8	-1.23	0.109	1757	0.983	0.891	16173	0.987
ATG7	-4.08	8	-1.23	0.109	1758	0.983	0.891	16172	0.987
ITGB4	-4.08	8	-1.23	0.109	1759	0.983	0.891	16171	0.987
NOL7	-4.08	8	-1.23	0.109	1760	0.983	0.891	16170	0.987
C6orf222	-4.08	8	-1.23	0.109	1761	0.983	0.891	16169	0.987
SPACA4	-4.08	8	-1.23	0.109	1762	0.983	0.891	16168	0.987
C20orf62	-4.08	8	-1.23	0.109	1763	0.983	0.891	16167	0.987
TMCC1	-4.08	8	-1.23	0.109	1764	0.983	0.891	16166	0.987
AKAP12	-4.07	8	-1.23	0.109	1765	0.983	0.891	16165	0.987
CHAMP1	-4.07	8	-1.23	0.11	1766	0.983	0.89	16164	0.987
EIF3F	-4.07	8	-1.23	0.11	1767	0.983	0.89	16163	0.987
CHUK	-4.07	8	-1.23	0.11	1768	0.983	0.89	16162	0.987
KCNIP2	-4.07	8	-1.23	0.11	1769	0.983	0.89	16161	0.987
HNMT	-4.07	8	-1.23	0.11	1770	0.983	0.89	16160	0.987
WDR72	-4.07	8	-1.23	0.11	1771	0.983	0.89	16159	0.987
NXNL1	-4.07	8	-1.23	0.11	1772	0.983	0.89	16158	0.987
EIF3M	-4.07	8	-1.23	0.11	1773	0.983	0.89	16157	0.987
TTC21A	-4.07	8	-1.23	0.11	1774	0.983	0.89	16156	0.987
NIPBL	-4.06	8	-1.23	0.11	1775	0.983	0.89	16155	0.987
LARS	-4.06	8	-1.23	0.11	1776	0.983	0.89	16154	0.987
ACBD3	-4.06	8	-1.23	0.11	1777	0.983	0.89	16153	0.987
DDX20	-4.06	8	-1.22	0.11	1778	0.983	0.89	16152	0.987
ANO6	-4.05	8	-1.22	0.111	1779	0.983	0.889	16151	0.987
NRCAM	-4.05	8	-1.22	0.111	1780	0.983	0.889	16150	0.987
NIT1	-4.05	8	-1.22	0.111	1781	0.983	0.889	16149	0.987
TIMM50	-4.05	8	-1.22	0.111	1782	0.983	0.889	16148	0.987
SLC30A1	-4.05	8	-1.22	0.111	1783	0.983	0.889	16147	0.987
VANGL1	-4.05	8	-1.22	0.111	1784	0.983	0.889	16146	0.987
ANGPTL5	-4.05	8	-1.22	0.111	1785	0.983	0.889	16145	0.987
KMT2E	-4.05	8	-1.22	0.111	1786	0.983	0.889	16144	0.987
KAT2A	-4.05	8	-1.22	0.111	1787	0.983	0.889	16143	0.987
MRPL47	-4.05	8	-1.22	0.111	1788	0.983	0.889	16142	0.987
TMPRSS4	-4.04	8	-1.22	0.111	1789	0.983	0.889	16141	0.987
EFNA2	-4.04	8	-1.22	0.111	1790	0.983	0.889	16140	0.987
FUCA1	-4.04	8	-1.22	0.111	1791	0.983	0.889	16139	0.987
FPR3	-4.04	8	-1.22	0.111	1792	0.983	0.889	16138	0.987
INO80D	-4.04	8	-1.22	0.112	1793	0.983	0.888	16137	0.987
PSMD6	-4.04	8	-1.22	0.112	1794	0.983	0.888	16136	0.987
PLAA	-4.03	8	-1.22	0.112	1795	0.983	0.888	16135	0.987
SKOR2	-4.03	8	-1.22	0.112	1796	0.983	0.888	16134	0.987
RAD51AP1	-4.03	8	-1.22	0.112	1797	0.983	0.888	16133	0.987
CD300E	-2.85	4	-1.22	0.112	1798	0.983	0.888	16132	0.987
IL1RAPL1	-4.03	8	-1.21	0.112	1799	0.983	0.888	16131	0.987
LIM2	-4.03	8	-1.21	0.112	1800	0.983	0.888	16130	0.987
FBXL4	-4.03	8	-1.21	0.112	1801	0.983	0.888	16129	0.987
BMP5	-4.03	8	-1.21	0.112	1802	0.983	0.888	16128	0.987
CLPX	-4.03	8	-1.21	0.112	1803	0.983	0.888	16127	0.987
CDK14	-4.02	8	-1.21	0.112	1804	0.983	0.888	16126	0.987
NDUFAF5	-4.02	8	-1.21	0.113	1805	0.983	0.887	16125	0.987
RASAL2	-4.02	8	-1.21	0.113	1806	0.983	0.887	16124	0.987
PCNXL3	-4.02	8	-1.21	0.113	1807	0.983	0.887	16123	0.987
PPP1R3F	-4.02	8	-1.21	0.113	1808	0.983	0.887	16122	0.987
SIX4	-4.02	8	-1.21	0.113	1809	0.983	0.887	16121	0.987
THAP6	-4.02	8	-1.21	0.113	1810	0.983	0.887	16120	0.987
GIN1	-4.02	8	-1.21	0.113	1811	0.983	0.887	16119	0.987
BLOC1S2	-4.02	8	-1.21	0.113	1812	0.983	0.887	16118	0.987
SEPHS1	-4.01	8	-1.21	0.113	1813	0.983	0.887	16117	0.986
GPC5	-4.01	8	-1.21	0.113	1814	0.983	0.887	16116	0.986
DPCD	-4.01	8	-1.21	0.113	1815	0.983	0.887	16115	0.986
CDH4	-4.01	8	-1.21	0.113	1816	0.983	0.887	16114	0.986
CUX2	-4.01	8	-1.21	0.113	1817	0.983	0.887	16113	0.986
MAPK1	-4.01	8	-1.21	0.114	1818	0.983	0.886	16112	0.986
BTBD18	-4	8	-1.21	0.114	1819	0.983	0.886	16111	0.986
GTPBP8	-4	8	-1.21	0.114	1820	0.983	0.886	16110	0.986
LARP6	-4	8	-1.21	0.114	1821	0.983	0.886	16109	0.986
C1orf52	-4	8	-1.21	0.114	1822	0.983	0.886	16108	0.986
TMEM19	-4	8	-1.21	0.114	1823	0.983	0.886	16107	0.986
HELB	-4	8	-1.21	0.114	1824	0.983	0.886	16106	0.986
TALDO1	-4	8	-1.21	0.114	1825	0.983	0.886	16105	0.986
TMPRSS11A	-4	8	-1.21	0.114	1826	0.983	0.886	16104	0.986
CTDP1	-4	8	-1.2	0.114	1827	0.983	0.886	16103	0.986
TGFBR2	-4	8	-1.2	0.114	1828	0.983	0.886	16102	0.986
MAGI3	-4	8	-1.2	0.114	1829	0.983	0.886	16101	0.986
LRRC46	-4	8	-1.2	0.114	1830	0.983	0.886	16100	0.986
CDH23	-3.99	8	-1.2	0.114	1831	0.983	0.886	16099	0.986
TPM1	-3.99	8	-1.2	0.114	1832	0.983	0.886	16098	0.986
APLP2	-3.99	8	-1.2	0.114	1833	0.983	0.886	16097	0.986
GUCA2A	-3.99	8	-1.2	0.115	1834	0.983	0.885	16096	0.986
GSDMA	-3.99	8	-1.2	0.115	1835	0.983	0.885	16095	0.986
BRD7	-3.99	8	-1.2	0.115	1836	0.983	0.885	16094	0.986
ZNF385B	-3.98	8	-1.2	0.115	1837	0.983	0.885	16093	0.986
CLDN11	-3.98	8	-1.2	0.115	1838	0.983	0.885	16092	0.986
TAF6	-3.98	8	-1.2	0.115	1839	0.983	0.885	16091	0.986
NAPA	-3.98	8	-1.2	0.115	1840	0.983	0.885	16090	0.986
NDUFB5	-3.98	8	-1.2	0.115	1841	0.983	0.885	16089	0.986
ACSF3	-3.98	8	-1.2	0.115	1842	0.983	0.885	16088	0.986
2021-03-09	-3.98	8	-1.2	0.115	1843	0.983	0.885	16087	0.986
CAPZA1	-3.97	8	-1.2	0.116	1844	0.983	0.884	16086	0.986
GLB1	-3.97	8	-1.2	0.116	1845	0.983	0.884	16085	0.986
RPF2	-3.97	8	-1.2	0.116	1846	0.983	0.884	16084	0.986
DUSP2	-3.97	8	-1.2	0.116	1847	0.983	0.884	16083	0.986
EIF2S2	-2.8	4	-1.19	0.116	1848	0.983	0.884	16082	0.985
CUBN	-3.97	8	-1.19	0.116	1849	0.983	0.884	16081	0.985
KRT72	-3.96	8	-1.19	0.116	1850	0.983	0.884	16080	0.985
MOS	-3.96	8	-1.19	0.116	1851	0.983	0.884	16079	0.985
ETV2	-3.96	8	-1.19	0.116	1852	0.983	0.884	16078	0.985
DLL4	-3.96	8	-1.19	0.116	1853	0.983	0.884	16077	0.985
PEX12	-3.96	8	-1.19	0.116	1854	0.983	0.884	16076	0.985
TEX9	-3.96	8	-1.19	0.116	1855	0.983	0.884	16075	0.985
CRKL	-3.96	8	-1.19	0.116	1856	0.983	0.884	16074	0.985
SAMD10	-3.96	8	-1.19	0.116	1857	0.983	0.884	16073	0.985
ULBP3	-3.96	8	-1.19	0.117	1858	0.983	0.883	16072	0.985
SCAF1	-3.96	8	-1.19	0.117	1859	0.983	0.883	16071	0.985
CAPN9	-3.96	8	-1.19	0.117	1860	0.983	0.883	16070	0.985
ACADM	-3.96	8	-1.19	0.117	1861	0.983	0.883	16069	0.985
KPNA1	-3.96	8	-1.19	0.117	1862	0.983	0.883	16068	0.985
RNLS	-3.95	8	-1.19	0.117	1863	0.983	0.883	16067	0.985
CDC14A	-3.95	8	-1.19	0.117	1864	0.983	0.883	16066	0.985
NFS1	-3.95	8	-1.19	0.117	1865	0.983	0.883	16065	0.985
CLDND1	-3.95	8	-1.19	0.117	1866	0.983	0.883	16064	0.985
FAM73A	-3.95	8	-1.19	0.117	1867	0.983	0.883	16063	0.985
RNF113A	-3.95	8	-1.19	0.117	1868	0.983	0.883	16062	0.985
KCNS2	-3.95	8	-1.19	0.117	1869	0.983	0.883	16061	0.985
SEMA4A	-3.95	8	-1.19	0.117	1870	0.983	0.883	16060	0.985
SHFM1	-3.95	8	-1.19	0.117	1871	0.983	0.883	16059	0.985
GTF2E2	-3.94	8	-1.19	0.117	1872	0.983	0.883	16058	0.985
MTNR1A	-3.94	8	-1.19	0.117	1873	0.983	0.883	16057	0.985
SLIT1	-3.94	8	-1.19	0.117	1874	0.983	0.883	16056	0.985
CRELD2	-3.94	8	-1.19	0.118	1875	0.983	0.882	16055	0.985
HOXA6	-3.94	8	-1.19	0.118	1876	0.983	0.882	16054	0.985
ZNRF3	-3.94	8	-1.19	0.118	1877	0.983	0.882	16053	0.985
ZNF706	-3.94	8	-1.19	0.118	1878	0.983	0.882	16052	0.985
WRAP73	-3.41	6	-1.19	0.118	1879	0.983	0.882	16051	0.985
APOLD1	-3.93	8	-1.18	0.118	1880	0.983	0.882	16050	0.985
CYBRD1	-3.93	8	-1.18	0.118	1881	0.983	0.882	16049	0.985
IGSF11	-3.93	8	-1.18	0.118	1882	0.983	0.882	16048	0.985
FABP2	-3.93	8	-1.18	0.118	1883	0.983	0.882	16047	0.985
KDM5B	-3.93	8	-1.18	0.118	1884	0.983	0.882	16046	0.985
ST5	-3.93	8	-1.18	0.118	1885	0.983	0.882	16045	0.985
FGFBP1	-3.93	8	-1.18	0.118	1886	0.983	0.882	16044	0.985
TBX19	-3.93	8	-1.18	0.118	1887	0.983	0.882	16043	0.985
PFDN5	-3.93	8	-1.18	0.118	1888	0.983	0.882	16042	0.985
NECAP2	-3.93	8	-1.18	0.118	1889	0.983	0.882	16041	0.985
PSMG2	-3.93	8	-1.18	0.119	1890	0.983	0.881	16040	0.985
HAND2	-3.92	8	-1.18	0.119	1891	0.983	0.881	16039	0.985
MBL2	-3.92	8	-1.18	0.119	1892	0.983	0.881	16038	0.985
CA7	-3.92	8	-1.18	0.119	1893	0.983	0.881	16037	0.985
PIK3CA	-3.92	8	-1.18	0.119	1894	0.983	0.881	16036	0.985
PPIL2	-3.92	8	-1.18	0.119	1895	0.983	0.881	16035	0.985
SHQ1	-3.92	8	-1.18	0.119	1896	0.983	0.881	16034	0.985
SLC5A1	-3.92	8	-1.18	0.119	1897	0.983	0.881	16033	0.985
BAI2	-3.92	8	-1.18	0.119	1898	0.983	0.881	16032	0.985
ENO2	-3.92	8	-1.18	0.119	1899	0.983	0.881	16031	0.985
PCSK9	-3.92	8	-1.18	0.119	1900	0.983	0.881	16030	0.985
PLXNB2	-3.91	8	-1.18	0.119	1901	0.983	0.881	16029	0.985
APOA1BP	-3.91	8	-1.18	0.119	1902	0.983	0.881	16028	0.985
TMEM92	-3.91	8	-1.18	0.119	1903	0.983	0.881	16027	0.985
TRIM62	-3.91	8	-1.18	0.119	1904	0.983	0.881	16026	0.985
KCNMB3	-3.91	8	-1.18	0.119	1905	0.983	0.881	16025	0.985
ACE	-3.91	8	-1.18	0.119	1906	0.983	0.881	16024	0.985
KCNJ3	-3.91	8	-1.18	0.12	1907	0.983	0.88	16023	0.985
C15orf60	-3.91	8	-1.18	0.12	1908	0.983	0.88	16022	0.985
TC2N	-3.91	8	-1.18	0.12	1909	0.983	0.88	16021	0.985
SULT1A2	-3.9	8	-1.18	0.12	1910	0.983	0.88	16020	0.985
KIF1B	-3.9	8	-1.17	0.12	1911	0.983	0.88	16019	0.985
CDC5L	-3.9	8	-1.17	0.12	1912	0.983	0.88	16018	0.985
C11orf74	-2.76	4	-1.17	0.12	1913	0.983	0.88	16017	0.985
METTL10	-3.9	8	-1.17	0.12	1914	0.983	0.88	16016	0.985
GLRX2	-3.9	8	-1.17	0.12	1915	0.983	0.88	16015	0.985
TRPA1	-3.9	8	-1.17	0.12	1916	0.983	0.88	16014	0.985
NSF	-3.9	8	-1.17	0.12	1917	0.983	0.88	16013	0.985
SPATA20	-3.9	8	-1.17	0.12	1918	0.983	0.88	16012	0.985
SETD8	-3.9	8	-1.17	0.12	1919	0.983	0.88	16011	0.985
SH3BP5L	-3.9	8	-1.17	0.121	1920	0.983	0.879	16010	0.985
KCTD3	-3.9	8	-1.17	0.121	1921	0.983	0.879	16009	0.985
CES5A	-3.89	8	-1.17	0.121	1922	0.983	0.879	16008	0.985
NRF1	-3.89	8	-1.17	0.121	1923	0.983	0.879	16007	0.985
LRRC69	-3.89	8	-1.17	0.121	1924	0.983	0.879	16006	0.985
UPF1	-3.37	6	-1.17	0.121	1925	0.983	0.879	16005	0.985
SERHL2	-3.89	8	-1.17	0.121	1926	0.983	0.879	16004	0.985
MSH2	-3.89	8	-1.17	0.121	1927	0.983	0.879	16003	0.985
ZNF691	-3.89	8	-1.17	0.121	1928	0.983	0.879	16002	0.985
MED18	-3.89	8	-1.17	0.121	1929	0.983	0.879	16001	0.985
NDUFB10	-3.89	8	-1.17	0.121	1930	0.983	0.879	16000	0.985
USP54	-3.89	8	-1.17	0.121	1931	0.983	0.879	15999	0.985
CNOT11	-3.88	8	-1.17	0.121	1932	0.983	0.879	15998	0.985
PCYOX1	-3.88	8	-1.17	0.121	1933	0.983	0.879	15997	0.985
ZNF41	-3.88	8	-1.17	0.121	1934	0.983	0.879	15996	0.985
FGFRL1	-3.88	8	-1.17	0.121	1935	0.983	0.879	15995	0.985
C11orf68	-3.88	8	-1.17	0.121	1936	0.983	0.879	15994	0.985
ANXA1	-3.88	8	-1.17	0.121	1937	0.983	0.879	15993	0.985
MED25	-3.88	8	-1.17	0.122	1938	0.983	0.878	15992	0.985
COQ10A	-3.36	6	-1.17	0.122	1939	0.983	0.878	15991	0.985
TBRG4	-3.88	8	-1.17	0.122	1940	0.983	0.878	15990	0.985
SIX2	-3.87	8	-1.17	0.122	1941	0.983	0.878	15989	0.985
FAM89A	-3.87	8	-1.17	0.122	1942	0.983	0.878	15988	0.985
MMEL1	-3.87	8	-1.17	0.122	1943	0.983	0.878	15987	0.985
LMCD1	-3.87	8	-1.17	0.122	1944	0.983	0.878	15986	0.985
IFNLR1	-3.87	8	-1.17	0.122	1945	0.983	0.878	15985	0.985
ZNF394	-3.87	8	-1.16	0.122	1946	0.983	0.878	15984	0.985
RANGAP1	-3.87	8	-1.16	0.122	1947	0.983	0.878	15983	0.985
AFF4	-3.87	8	-1.16	0.122	1948	0.983	0.878	15982	0.985
NPL	-3.87	8	-1.16	0.122	1949	0.983	0.878	15981	0.985
ALG14	-3.87	8	-1.16	0.122	1950	0.983	0.878	15980	0.985
POLR2H	-3.87	8	-1.16	0.122	1951	0.983	0.878	15979	0.985
TPD52L2	-3.87	8	-1.16	0.122	1952	0.983	0.878	15978	0.985
C1QTNF8	-3.87	8	-1.16	0.122	1953	0.983	0.878	15977	0.985
CCNJ	-3.87	8	-1.16	0.122	1954	0.983	0.878	15976	0.985
C5orf63	-3.87	8	-1.16	0.122	1955	0.983	0.878	15975	0.985
SEC22C	-3.86	8	-1.16	0.123	1956	0.983	0.877	15974	0.985
OR2AG2	-3.86	8	-1.16	0.123	1957	0.983	0.877	15973	0.985
MYRF	-3.86	8	-1.16	0.123	1958	0.983	0.877	15972	0.985
LATS1	-3.86	8	-1.16	0.123	1959	0.983	0.877	15971	0.985
MYO1F	-3.86	8	-1.16	0.123	1960	0.983	0.877	15970	0.985
C19orf80	-3.86	8	-1.16	0.123	1961	0.983	0.877	15969	0.985
PGAM5	-3.86	8	-1.16	0.123	1962	0.983	0.877	15968	0.985
TBCC	-3.86	8	-1.16	0.123	1963	0.983	0.877	15967	0.985
CHTF8	-3.86	8	-1.16	0.123	1964	0.983	0.877	15966	0.985
PRSS46	-3.86	8	-1.16	0.123	1965	0.983	0.877	15965	0.985
MAGEF1	-3.86	8	-1.16	0.123	1966	0.983	0.877	15964	0.985
KIF14	-3.86	8	-1.16	0.123	1967	0.983	0.877	15963	0.985
ADNP2	-3.85	8	-1.16	0.123	1968	0.983	0.877	15962	0.985
LSM14B	-3.85	8	-1.16	0.123	1969	0.983	0.877	15961	0.985
KLF4	-3.85	8	-1.16	0.123	1970	0.983	0.877	15960	0.985
CYP11B2	-3.85	8	-1.16	0.124	1971	0.983	0.876	15959	0.985
TUT1	-3.85	8	-1.16	0.124	1972	0.983	0.876	15958	0.985
ETV6	-3.85	8	-1.16	0.124	1973	0.983	0.876	15957	0.985
IL17A	-3.85	8	-1.16	0.124	1974	0.983	0.876	15956	0.985
C2CD4D	-3.85	8	-1.16	0.124	1975	0.983	0.876	15955	0.985
CRIP1	-3.84	8	-1.16	0.124	1976	0.983	0.876	15954	0.985
PRPF4B	-3.84	8	-1.16	0.124	1977	0.983	0.876	15953	0.985
AKR1A1	-3.84	8	-1.16	0.124	1978	0.983	0.876	15952	0.985
ARHGEF17	-3.84	8	-1.15	0.124	1979	0.983	0.876	15951	0.984
REG4	-3.84	8	-1.15	0.124	1980	0.983	0.876	15950	0.984
WDR11	-3.84	8	-1.15	0.124	1981	0.983	0.876	15949	0.984
KCNA2	-3.83	8	-1.15	0.125	1982	0.983	0.875	15948	0.984
NUAK1	-3.83	8	-1.15	0.125	1983	0.983	0.875	15947	0.984
CD200R1	-3.83	8	-1.15	0.125	1984	0.983	0.875	15946	0.984
SLC15A4	-3.83	8	-1.15	0.125	1985	0.983	0.875	15945	0.984
EMILIN3	-3.83	8	-1.15	0.125	1986	0.983	0.875	15944	0.984
KIR3DL1	-3.83	8	-1.15	0.125	1987	0.983	0.875	15943	0.984
ING1	-3.83	8	-1.15	0.125	1988	0.983	0.875	15942	0.984
GPR62	-3.83	8	-1.15	0.125	1989	0.983	0.875	15941	0.984
SLC13A4	-3.83	8	-1.15	0.125	1990	0.983	0.875	15940	0.984
ACTRT3	-3.83	8	-1.15	0.125	1991	0.983	0.875	15939	0.984
PPIF	-3.83	8	-1.15	0.125	1992	0.983	0.875	15938	0.984
SMPD3	-3.82	8	-1.15	0.125	1993	0.983	0.875	15937	0.984
XRCC5	-3.82	8	-1.15	0.125	1994	0.983	0.875	15936	0.984
ANXA7	-3.82	8	-1.15	0.125	1995	0.983	0.875	15935	0.984
PIWIL1	-3.82	8	-1.15	0.125	1996	0.983	0.875	15934	0.984
DSC3	-3.82	8	-1.15	0.126	1997	0.983	0.874	15933	0.984
ZBTB25	-3.82	8	-1.15	0.126	1998	0.983	0.874	15932	0.984
CMPK1	-3.82	8	-1.15	0.126	1999	0.983	0.874	15931	0.984
[truncated: 15,930 more rows]
