# Supplementary material for: DePARylation is critical for S phase progression and cell survival
Source: eLife. 2024 Apr 5;12:RP89303. doi: 10.7554/eLife.89303 (PMC10997334; doi:10.7554/eLife.89303)
Supplement: Figure 5—source data 2. [file elife-89303-fig5-data2.xlsx]

## Sheet: 293A
GENE	sumZ	numObs	normZ	pval_synth	rank_synth	fdr_synth	pval_supp	rank_supp	fdr_supp
POLB	-38.74	8	-10.41	1.07e-25	1	1.92e-21	1	17929	1
SCAP	-25.96	8	-6.94	2.01e-12	2	1.81e-08	1	17928	1
XRCC1	-24.16	8	-6.45	5.64e-11	3	3.37e-07	1	17927	1
EXO1	-20.67	8	-5.5	1.9e-08	4	8.52e-05	1	17926	1
BYSL	-19.05	8	-5.06	2.12e-07	5	0.000759	1	17925	1
LIG1	-18.59	8	-4.93	4.07e-07	6	0.00122	1	17924	1
HSD17B3	-17.51	8	-4.64	1.75e-06	7	0.00449	1	17923	1
MYL2	-15.91	8	-4.2	1.31e-05	8	0.0293	1	17922	1
POLE3	-15.22	8	-4.02	2.95e-05	9	0.0587	1	17921	1
GLRA3	-12.75	6	-3.88	5.24e-05	10	0.0864	1	17920	1
SP1	-14.71	8	-3.88	5.3e-05	11	0.0864	1	17919	1
SOD1	-14.44	8	-3.8	7.15e-05	12	0.107	1	17918	1
NUS1	-14.12	8	-3.72	0.000101	13	0.14	1	17917	1
ARNT2	-13.92	8	-3.66	0.000126	14	0.161	1	17916	1
DALRD3	-13.61	8	-3.58	0.000172	15	0.206	1	17915	1
ADCY9	-13.41	8	-3.52	0.000214	16	0.225	1	17914	1
SLC45A1	-13.34	8	-3.5	0.000229	17	0.225	1	17913	1
COASY	-13.31	8	-3.5	0.000237	18	0.225	1	17912	1
POLE4	-13.27	8	-3.49	0.000245	19	0.225	1	17911	1
FRMD1	-13.25	8	-3.48	0.000251	20	0.225	1	17910	1
KIAA1462	-13.14	8	-3.45	0.00028	21	0.239	1	17909	1
OVOL2	-12.97	8	-3.4	0.000331	22	0.264	1	17908	1
CYP4B1	-12.95	8	-3.4	0.000339	23	0.264	1	17907	1
SLC9A8	-12.81	8	-3.36	0.000389	24	0.291	1	17906	1
INO80B	-12.69	8	-3.33	0.000436	25	0.304	1	17905	1
PER1	-12.68	8	-3.33	0.00044	26	0.304	1	17904	1
MBTPS1	-12.63	8	-3.31	0.000463	27	0.307	1	17903	1
POLR2C	-12.57	8	-3.3	0.00049	28	0.314	1	17902	1
MBD2	-12.43	8	-3.26	0.000564	29	0.349	0.999	17901	1
SLC9A5	-12.32	8	-3.23	0.000624	30	0.364	0.999	17900	1
ALPPL2	-8.71	4	-3.23	0.000629	31	0.364	0.999	17899	1
TMEM132D	-12.27	8	-3.21	0.000658	32	0.369	0.999	17898	1
MAN1B1	-12.17	8	-3.19	0.000718	33	0.39	0.999	17897	1
FOXO3	-12.14	8	-3.18	0.000739	34	0.39	0.999	17896	1
AIFM2	-12.1	8	-3.17	0.000768	35	0.393	0.999	17895	1
IL27RA	-12.05	8	-3.15	0.000803	36	0.394	0.999	17894	1
ADCK1	-12.04	8	-3.15	0.000812	37	0.394	0.999	17893	1
MINPP1	-10.3	6	-3.11	0.000931	38	0.439	0.999	17892	1
PRIMA1	-11.82	8	-3.09	0.001	39	0.46	0.999	17891	1
SMIM14	-11.72	8	-3.06	0.00109	40	0.489	0.999	17890	1
CHPF	-11.69	8	-3.06	0.00112	41	0.489	0.999	17889	1
ALDH1A1	-11.64	8	-3.04	0.00117	42	0.497	0.999	17888	1
NOS1AP	-11.62	8	-3.04	0.00119	43	0.497	0.999	17887	1
SPON2	-11.54	8	-3.02	0.00128	44	0.508	0.999	17886	1
ZRANB3	-11.52	8	-3.01	0.00131	45	0.508	0.999	17885	1
BSCL2	-11.44	8	-2.99	0.00141	46	0.508	0.999	17884	1
UBE3B	-11.43	8	-2.98	0.00142	47	0.508	0.999	17883	1
FKBP11	-11.42	8	-2.98	0.00143	48	0.508	0.999	17882	1
RNLS	-11.42	8	-2.98	0.00144	49	0.508	0.999	17881	1
LEO1	-11.41	8	-2.98	0.00144	50	0.508	0.999	17880	1
VMO1	-11.4	8	-2.98	0.00145	51	0.508	0.999	17879	1
C1orf229	-11.38	8	-2.97	0.00148	52	0.508	0.999	17878	1
CCDC64B	-11.37	8	-2.97	0.0015	53	0.508	0.998	17877	1
MGEA5	-11.32	8	-2.96	0.00156	54	0.512	0.998	17876	1
MESDC2	-11.29	8	-2.95	0.00161	55	0.512	0.998	17875	1
SPESP1	-11.25	8	-2.94	0.00167	56	0.512	0.998	17874	1
CTBP1	-11.24	8	-2.93	0.00167	57	0.512	0.998	17873	1
PSMD3	-11.22	8	-2.93	0.00171	58	0.512	0.998	17872	1
KRT8	-5.61	2	-2.93	0.00171	59	0.512	0.998	17871	1
CDCA3	-11.22	8	-2.93	0.00171	60	0.512	0.998	17870	1
LPAR3	-11.15	8	-2.91	0.00181	61	0.518	0.998	17869	1
YJEFN3	-11.15	8	-2.91	0.00182	62	0.518	0.998	17868	1
POLR1D	-11.13	8	-2.9	0.00184	63	0.518	0.998	17867	1
EVA1A	-11.13	8	-2.9	0.00185	64	0.518	0.998	17866	1
ZNF467	-11.11	8	-2.9	0.00188	65	0.518	0.998	17865	1
NAA25	-11.08	8	-2.89	0.00193	66	0.52	0.998	17864	1
SP8	-11.07	8	-2.89	0.00195	67	0.52	0.998	17863	1
TRIM7	-11.01	8	-2.87	0.00205	68	0.52	0.998	17862	1
CLUAP1	-11.01	8	-2.87	0.00205	69	0.52	0.998	17861	1
GALR2	-10.99	8	-2.87	0.00208	70	0.52	0.998	17860	1
GPA33	-10.95	8	-2.85	0.00216	71	0.52	0.998	17859	1
RFT1	-10.94	8	-2.85	0.00217	72	0.52	0.998	17858	1
TRUB1	-9.47	6	-2.85	0.00219	73	0.52	0.998	17857	1
IGBP1	-10.93	8	-2.85	0.0022	74	0.52	0.998	17856	1
BAIAP2L2	-10.91	8	-2.84	0.00223	75	0.52	0.998	17855	1
ZXDA	-7.71	4	-2.84	0.00225	76	0.52	0.998	17854	1
TOPORS	-9.43	6	-2.84	0.00227	77	0.52	0.998	17853	1
IRF9	-10.85	8	-2.83	0.00235	78	0.52	0.998	17852	1
WBP1	-10.83	8	-2.82	0.00238	79	0.52	0.998	17851	1
PCCB	-10.83	8	-2.82	0.00239	80	0.52	0.998	17850	1
RAB15	-10.82	8	-2.82	0.00241	81	0.52	0.998	17849	1
TM9SF4	-10.81	8	-2.82	0.00243	82	0.52	0.998	17848	1
CHAF1A	-10.81	8	-2.82	0.00243	83	0.52	0.998	17847	1
ZNF619	-10.81	8	-2.82	0.00244	84	0.52	0.998	17846	1
PDZD2	-10.76	8	-2.8	0.00252	85	0.53	0.997	17845	1
SRMS	-10.74	8	-2.8	0.00257	86	0.53	0.997	17844	1
RAB28	-10.74	8	-2.8	0.00258	87	0.53	0.997	17843	1
C12orf45	-10.73	8	-2.79	0.0026	88	0.53	0.997	17842	1
RABIF	-10.69	8	-2.78	0.00269	89	0.53	0.997	17841	1
GTF3C2	-10.69	8	-2.78	0.00269	90	0.53	0.997	17840	1
BCL2L12	-10.67	8	-2.78	0.00274	91	0.53	0.997	17839	1
SPECC1	-10.66	8	-2.78	0.00274	92	0.53	0.997	17838	1
JMJD7	-10.66	8	-2.78	0.00275	93	0.53	0.997	17837	1
CPLX3	-10.63	8	-2.77	0.00283	94	0.531	0.997	17836	1
ITFG2	-10.62	8	-2.77	0.00284	95	0.531	0.997	17835	1
NAP1L2	-10.61	8	-2.76	0.00288	96	0.531	0.997	17834	1
LAG3	-10.61	8	-2.76	0.00288	97	0.531	0.997	17833	1
ZNF600	-10.59	8	-2.76	0.00291	98	0.531	0.997	17832	1
NDUFA8	-10.58	8	-2.75	0.00293	99	0.531	0.997	17831	1
FAM46A	-10.53	8	-2.74	0.00307	100	0.545	0.997	17830	1
PAX9	-10.52	8	-2.74	0.0031	101	0.545	0.997	17829	1
LCN9	-10.49	8	-2.73	0.00317	102	0.545	0.997	17828	1
PPP1R36	-10.48	8	-2.73	0.0032	103	0.545	0.997	17827	1
CD248	-10.46	8	-2.72	0.00325	104	0.545	0.997	17826	1
ITIH1	-10.46	8	-2.72	0.00325	105	0.545	0.997	17825	1
LDB1	-10.43	8	-2.71	0.00334	106	0.545	0.997	17824	1
SLC9A4	-10.42	8	-2.71	0.00337	107	0.545	0.997	17823	1
ZNF780A	-7.35	4	-2.7	0.00342	108	0.545	0.997	17822	1
RIN3	-10.39	8	-2.7	0.00344	109	0.545	0.997	17821	1
CITED2	-10.39	8	-2.7	0.00345	110	0.545	0.997	17820	1
ZNF131	-10.38	8	-2.7	0.00346	111	0.545	0.997	17819	1
DOLK	-10.37	8	-2.7	0.00349	112	0.545	0.997	17818	1
HOXB5	-10.36	8	-2.69	0.00353	113	0.545	0.996	17817	1
D2HGDH	-10.36	8	-2.69	0.00354	114	0.545	0.996	17816	1
HTR6	-10.36	8	-2.69	0.00354	115	0.545	0.996	17815	1
PIM2	-10.35	8	-2.69	0.00356	116	0.545	0.996	17814	1
C6orf47	-10.33	8	-2.69	0.00362	117	0.545	0.996	17813	1
MRPL2	-10.33	8	-2.68	0.00363	118	0.545	0.996	17812	1
CDK5R2	-10.33	8	-2.68	0.00363	119	0.545	0.996	17811	1
HUNK	-10.32	8	-2.68	0.00365	120	0.545	0.996	17810	1
RGS9BP	-10.24	8	-2.66	0.00389	121	0.572	0.996	17809	1
GAS2L1	-10.24	8	-2.66	0.0039	122	0.572	0.996	17808	1
B3GALT4	-10.21	8	-2.65	0.00398	123	0.572	0.996	17807	1
INPP5A	-10.21	8	-2.65	0.00399	124	0.572	0.996	17806	1
POLD2	-10.2	8	-2.65	0.00401	125	0.572	0.996	17805	1
PTPN6	-10.19	8	-2.65	0.00406	126	0.572	0.996	17804	1
DCTN4	-10.18	8	-2.65	0.00407	127	0.572	0.996	17803	1
CACNA1E	-10.17	8	-2.64	0.00412	128	0.572	0.996	17802	1
FAM172A	-10.16	8	-2.64	0.00415	129	0.572	0.996	17801	1
PPM1F	-10.16	8	-2.64	0.00415	130	0.572	0.996	17800	1
TLR10	-10.14	8	-2.63	0.00422	131	0.572	0.996	17799	1
FEM1A	-10.14	8	-2.63	0.00422	132	0.572	0.996	17798	1
IGSF9B	-10.12	8	-2.63	0.00427	133	0.572	0.996	17797	1
RAB5C	-10.12	8	-2.63	0.00428	134	0.572	0.996	17796	1
PRKAR2A	-10.11	8	-2.62	0.00434	135	0.572	0.996	17795	1
CENPA	-10.1	8	-2.62	0.00434	136	0.572	0.996	17794	1
EXOC3L1	-10.08	8	-2.62	0.00442	137	0.578	0.996	17793	1
MZT1	-7.11	4	-2.61	0.00451	138	0.58	0.995	17792	1
PSME3	-10.03	8	-2.6	0.00461	139	0.58	0.995	17791	1
PPARD	-10.02	8	-2.6	0.00463	140	0.58	0.995	17790	1
VPS36	-10.02	8	-2.6	0.00465	141	0.58	0.995	17789	1
DPY19L4	-10	8	-2.59	0.00473	142	0.58	0.995	17788	1
TIMELESS	-9.98	8	-2.59	0.00479	143	0.58	0.995	17787	1
GH1	-9.98	8	-2.59	0.0048	144	0.58	0.995	17786	1
DYNC1LI2	-9.97	8	-2.59	0.00482	145	0.58	0.995	17785	1
CALHM1	-9.97	8	-2.59	0.00485	146	0.58	0.995	17784	1
TNPO3	-9.32	7	-2.59	0.00486	147	0.58	0.995	17783	1
HOXC12	-9.96	8	-2.59	0.00487	148	0.58	0.995	17782	1
HIST1H4F	-9.96	8	-2.58	0.00487	149	0.58	0.995	17781	1
IFIT3	-9.94	8	-2.58	0.00496	150	0.58	0.995	17780	1
AMPD3	-9.93	8	-2.58	0.00497	151	0.58	0.995	17779	1
STRA13	-9.93	8	-2.58	0.00499	152	0.58	0.995	17778	1
SCNN1G	-9.92	8	-2.58	0.00501	153	0.58	0.995	17777	1
HECW2	-9.92	8	-2.57	0.00503	154	0.58	0.995	17776	1
ZZEF1	-9.92	8	-2.57	0.00504	155	0.58	0.995	17775	1
EXOSC5	-9.92	8	-2.57	0.00504	156	0.58	0.995	17774	1
FZD8	-9.9	8	-2.57	0.00511	157	0.584	0.995	17773	1
SHC2	-9.88	8	-2.56	0.00517	158	0.586	0.995	17772	1
BLCAP	-9.87	8	-2.56	0.00524	159	0.59	0.995	17771	1
PRICKLE2	-9.85	8	-2.56	0.0053	160	0.59	0.995	17770	1
FBXL7	-9.85	8	-2.56	0.0053	161	0.59	0.995	17769	1
COX5B	-9.84	8	-2.55	0.00533	162	0.59	0.995	17768	1
CCDC149	-9.82	8	-2.55	0.00543	163	0.595	0.995	17767	1
TAGAP	-9.82	8	-2.55	0.00544	164	0.595	0.995	17766	1
RESP18	-8.49	6	-2.54	0.00552	165	0.599	0.994	17765	1
DNAJC7	-9.78	8	-2.53	0.00562	166	0.607	0.994	17764	1
AP3S2	-8.46	6	-2.53	0.00567	167	0.608	0.994	17763	1
PNKP	-9.75	8	-2.53	0.00572	168	0.608	0.994	17762	1
PFKP	-9.75	8	-2.53	0.00573	169	0.608	0.994	17761	1
C8orf82	-9.73	8	-2.52	0.00584	170	0.609	0.994	17760	1
OR10P1	-9.73	8	-2.52	0.00584	171	0.609	0.994	17759	1
DLX4	-9.71	8	-2.52	0.0059	172	0.609	0.994	17758	1
SV2B	-9.71	8	-2.52	0.00592	173	0.609	0.994	17757	1
TGFB1	-9.71	8	-2.52	0.00593	174	0.609	0.994	17756	1
ZFAND2B	-9.7	8	-2.51	0.00597	175	0.609	0.994	17755	1
SLC30A8	-9.7	8	-2.51	0.00598	176	0.609	0.994	17754	1
DEFB121	-8.37	6	-2.51	0.0061	177	0.613	0.994	17753	1
SEC11C	-9.66	8	-2.5	0.00616	178	0.613	0.994	17752	1
IPPK	-9.65	8	-2.5	0.00619	179	0.613	0.994	17751	1
TBX19	-9.65	8	-2.5	0.0062	180	0.613	0.994	17750	1
TIFAB	-9.63	8	-2.5	0.00629	181	0.613	0.994	17749	1
ARF4	-8.33	6	-2.49	0.00635	182	0.613	0.994	17748	1
METTL25	-8.99	7	-2.49	0.00638	183	0.613	0.994	17747	1
NFASC	-9.61	8	-2.49	0.00641	184	0.613	0.994	17746	1
CDK9	-9.59	8	-2.48	0.0065	185	0.613	0.994	17745	1
C16orf72	-8.3	6	-2.48	0.00651	186	0.613	0.993	17744	1
METTL21A	-9.59	8	-2.48	0.00651	187	0.613	0.993	17743	1
SERPINF2	-9.58	8	-2.48	0.00653	188	0.613	0.993	17742	1
CD101	-9.58	8	-2.48	0.00656	189	0.613	0.993	17741	1
RNF168	-9.57	8	-2.48	0.00658	190	0.613	0.993	17740	1
TINAG	-9.57	8	-2.48	0.00659	191	0.613	0.993	17739	1
GPR27	-9.57	8	-2.48	0.0066	192	0.613	0.993	17738	1
SMARCD2	-9.56	8	-2.48	0.00664	193	0.613	0.993	17737	1
ALPK3	-9.55	8	-2.47	0.00667	194	0.613	0.993	17736	1
EPB41L4B	-9.55	8	-2.47	0.00671	195	0.613	0.993	17735	1
IRX1	-9.54	8	-2.47	0.00673	196	0.613	0.993	17734	1
OSGEP	-8.25	6	-2.47	0.00682	197	0.613	0.993	17733	1
NUDT17	-9.52	8	-2.46	0.00686	198	0.613	0.993	17732	1
EPM2AIP1	-9.51	8	-2.46	0.00688	199	0.613	0.993	17731	1
ARAF	-9.51	8	-2.46	0.0069	200	0.613	0.993	17730	1
C14orf166	-9.51	8	-2.46	0.00691	201	0.613	0.993	17729	1
LMTK2	-9.49	8	-2.46	0.007	202	0.613	0.993	17728	1
SGK1	-8.2	6	-2.45	0.00711	203	0.613	0.993	17727	1
ZNF276	-9.46	8	-2.45	0.00715	204	0.613	0.993	17726	1
ANKRD13B	-9.45	8	-2.45	0.00723	205	0.613	0.993	17725	1
CNTNAP1	-9.45	8	-2.45	0.00724	206	0.613	0.993	17724	1
SNX7	-9.45	8	-2.45	0.00724	207	0.613	0.993	17723	1
POPDC2	-9.44	8	-2.44	0.00725	208	0.613	0.993	17722	1
RPF1	-9.44	8	-2.44	0.00728	209	0.613	0.993	17721	1
AMOTL1	-9.43	8	-2.44	0.00733	210	0.613	0.993	17720	1
ZNF414	-9.42	8	-2.44	0.00739	211	0.613	0.993	17719	1
SGPL1	-9.42	8	-2.44	0.0074	212	0.613	0.993	17718	1
ZCCHC13	-9.42	8	-2.44	0.0074	213	0.613	0.993	17717	1
MXI1	-9.41	8	-2.44	0.00741	214	0.613	0.993	17716	1
HYAL1	-9.41	8	-2.44	0.00741	215	0.613	0.993	17715	1
KCNH3	-9.41	8	-2.43	0.00746	216	0.613	0.993	17714	1
KMT2D	-9.4	8	-2.43	0.00747	217	0.613	0.993	17713	1
S100A3	-9.4	8	-2.43	0.0075	218	0.613	0.992	17712	1
CWF19L2	-9.4	8	-2.43	0.00751	219	0.613	0.992	17711	1
PAPD7	-9.39	8	-2.43	0.00753	220	0.613	0.992	17710	1
NCOR2	-9.36	8	-2.42	0.00772	221	0.623	0.992	17709	1
NCLN	-9.35	8	-2.42	0.00775	222	0.623	0.992	17708	1
CCDC61	-9.35	8	-2.42	0.00779	223	0.623	0.992	17707	1
ERAP2	-9.34	8	-2.42	0.00785	224	0.623	0.992	17706	1
RPS5	-9.33	8	-2.41	0.00791	225	0.623	0.992	17705	1
PCYOX1L	-9.33	8	-2.41	0.00792	226	0.623	0.992	17704	1
TMEM150A	-9.32	8	-2.41	0.00798	227	0.623	0.992	17703	1
ERICH1	-9.31	8	-2.41	0.00799	228	0.623	0.992	17702	1
EFEMP1	-9.3	8	-2.41	0.00805	229	0.623	0.992	17701	1
GINS3	-9.29	8	-2.4	0.00812	230	0.623	0.992	17700	1
WHSC1L1	-9.29	8	-2.4	0.00813	231	0.623	0.992	17699	1
CEBPA	-9.29	8	-2.4	0.00816	232	0.623	0.992	17698	1
KRT32	-9.28	8	-2.4	0.00817	233	0.623	0.992	17697	1
FAAH	-9.28	8	-2.4	0.0082	234	0.623	0.992	17696	1
CHD4	-9.28	8	-2.4	0.00822	235	0.623	0.992	17695	1
ANAPC5	-9.27	8	-2.4	0.00824	236	0.623	0.992	17694	1
DNAJC4	-9.27	8	-2.4	0.00826	237	0.623	0.992	17693	1
PSMB1	-9.27	8	-2.4	0.00827	238	0.623	0.992	17692	1
RABEP2	-9.25	8	-2.39	0.00838	239	0.624	0.992	17691	1
CCS	-9.25	8	-2.39	0.0084	240	0.624	0.992	17690	1
FOXN1	-9.25	8	-2.39	0.00841	241	0.624	0.992	17689	1
SUSD1	-9.24	8	-2.39	0.00842	242	0.624	0.992	17688	1
C6orf120	-9.23	8	-2.39	0.00849	243	0.626	0.992	17687	1
FBXO10	-9.22	8	-2.38	0.00859	244	0.63	0.991	17686	1
HNRNPH1	-9.21	8	-2.38	0.00862	245	0.63	0.991	17685	1
PCDHA5	-9.21	8	-2.38	0.00866	246	0.63	0.991	17684	1
ENDOV	-9.2	8	-2.38	0.00869	247	0.63	0.991	17683	1
ALPP	-6.5	4	-2.38	0.00872	248	0.63	0.991	17682	1
TRIM28	-9.18	8	-2.37	0.00881	249	0.635	0.991	17681	1
ZRSR1	-4.58	2	-2.37	0.0089	250	0.639	0.991	17680	1
ZNF671	-9.16	8	-2.37	0.00894	251	0.639	0.991	17679	1
TMEM121	-9.15	8	-2.36	0.00904	252	0.641	0.991	17678	1
DLX5	-9.15	8	-2.36	0.00905	253	0.641	0.991	17677	1
ATP5B	-9.12	8	-2.36	0.00921	254	0.647	0.991	17676	1
RAB40B	-9.11	8	-2.35	0.00929	255	0.647	0.991	17675	1
PSMB7	-9.11	8	-2.35	0.00931	256	0.647	0.991	17674	1
C21orf88	-9.11	8	-2.35	0.00931	257	0.647	0.991	17673	1
KAZALD1	-9.1	8	-2.35	0.00934	258	0.647	0.991	17672	1
MON2	-9.1	8	-2.35	0.00934	259	0.647	0.991	17671	1
CCT7	-9.09	8	-2.35	0.0094	260	0.648	0.991	17670	1
MREG	-9.08	8	-2.35	0.0095	261	0.653	0.99	17669	1
PPAP2B	-9.06	8	-2.34	0.00961	262	0.655	0.99	17668	1
RIPK1	-9.06	8	-2.34	0.00962	263	0.655	0.99	17667	1
ZNF526	-9.06	8	-2.34	0.00964	264	0.655	0.99	17666	1
SF3A2	-7.16	5	-2.34	0.00967	265	0.655	0.99	17665	1
ZNF490	-9.05	8	-2.34	0.00972	266	0.655	0.99	17664	1
FMNL1	-9.03	8	-2.33	0.00981	267	0.656	0.99	17663	1
DNAJC15	-9.03	8	-2.33	0.00986	268	0.656	0.99	17662	1
GLRA1	-9.03	8	-2.33	0.00986	269	0.656	0.99	17661	1
KIN	-9.02	8	-2.33	0.00991	270	0.656	0.99	17660	1
DACH1	-9.02	8	-2.33	0.00994	271	0.656	0.99	17659	1
KIFC3	-9.01	8	-2.33	0.00998	272	0.656	0.99	17658	1
HGS	-9.01	8	-2.33	0.01	273	0.656	0.99	17657	1
CCDC22	-8.99	8	-2.32	0.0102	274	0.665	0.99	17656	1
ACVRL1	-8.97	8	-2.32	0.0103	275	0.669	0.99	17655	1
ASCL2	-8.96	8	-2.31	0.0104	276	0.669	0.99	17654	1
BCMO1	-8.95	8	-2.31	0.0104	277	0.669	0.99	17653	1
THOC6	-8.95	8	-2.31	0.0105	278	0.669	0.99	17652	1
TSPO	-8.94	8	-2.31	0.0105	279	0.669	0.99	17651	1
OPRL1	-8.94	8	-2.31	0.0105	280	0.669	0.989	17650	1
PIGA	-8.93	8	-2.31	0.0106	281	0.669	0.989	17649	1
RNF113A	-8.93	8	-2.3	0.0106	282	0.669	0.989	17648	1
FEZF1	-8.93	8	-2.3	0.0106	283	0.669	0.989	17647	1
ARRB2	-8.93	8	-2.3	0.0106	284	0.669	0.989	17646	1
C21orf33	-8.92	8	-2.3	0.0106	285	0.669	0.989	17645	1
PRKRA	-8.9	8	-2.3	0.0108	286	0.675	0.989	17644	1
CXCL13	-8.9	8	-2.3	0.0108	287	0.675	0.989	17643	1
SREBF2	-8.89	8	-2.29	0.0109	288	0.679	0.989	17642	1
GLIS2	-8.88	8	-2.29	0.011	289	0.682	0.989	17641	1
C22orf43	-8.86	8	-2.29	0.0111	290	0.685	0.989	17640	1
C22orf42	-8.86	8	-2.29	0.0111	291	0.685	0.989	17639	1
SHE	-8.85	8	-2.28	0.0112	292	0.687	0.989	17638	1
BAP1	-8.85	8	-2.28	0.0112	293	0.688	0.989	17637	1
PRUNE2	-8.84	8	-2.28	0.0113	294	0.69	0.989	17636	1
SLC4A7	-8.83	8	-2.28	0.0114	295	0.693	0.989	17635	1
NAE1	-8.81	8	-2.27	0.0115	296	0.696	0.988	17634	1
GLP2R	-8.81	8	-2.27	0.0115	297	0.696	0.988	17633	1
MMAA	-8.8	8	-2.27	0.0116	298	0.697	0.988	17632	1
C19orf73	-8.8	8	-2.27	0.0116	299	0.697	0.988	17631	1
CEP152	-7.61	6	-2.27	0.0117	300	0.699	0.988	17630	1
WIPF3	-8.79	8	-2.27	0.0117	301	0.699	0.988	17629	1
FAM109A	-8.78	8	-2.26	0.0118	302	0.7	0.988	17628	1
LEPREL4	-8.77	8	-2.26	0.0119	303	0.701	0.988	17627	1
FAM9C	-8.77	8	-2.26	0.0119	304	0.701	0.988	17626	1
ZNF628	-8.76	8	-2.26	0.0119	305	0.701	0.988	17625	1
FAM161B	-8.75	8	-2.26	0.012	306	0.702	0.988	17624	1
LRRC20	-8.74	8	-2.25	0.0122	307	0.702	0.988	17623	1
POLR2I	-8.73	8	-2.25	0.0122	308	0.702	0.988	17622	1
ELMOD2	-8.73	8	-2.25	0.0122	309	0.702	0.988	17621	1
MSH5	-8.73	8	-2.25	0.0122	310	0.702	0.988	17620	1
KPNB1	-7.56	6	-2.25	0.0123	311	0.702	0.988	17619	1
DUOX1	-8.7	8	-2.24	0.0124	312	0.702	0.988	17618	1
B3GALNT1	-8.7	8	-2.24	0.0125	313	0.702	0.988	17617	1
BUB3	-8.14	7	-2.24	0.0125	314	0.702	0.988	17616	1
GCK	-8.7	8	-2.24	0.0125	315	0.702	0.987	17615	1
ASB1	-8.69	8	-2.24	0.0125	316	0.702	0.987	17614	1
FAM198B	-8.69	8	-2.24	0.0125	317	0.702	0.987	17613	1
CAV3	-8.69	8	-2.24	0.0126	318	0.702	0.987	17612	1
ZBP1	-8.69	8	-2.24	0.0126	319	0.702	0.987	17611	1
PROX2	-8.69	8	-2.24	0.0126	320	0.702	0.987	17610	1
RPA1	-8.69	8	-2.24	0.0126	321	0.702	0.987	17609	1
KLHDC10	-8.68	8	-2.24	0.0126	322	0.702	0.987	17608	1
HEATR1	-8.68	8	-2.24	0.0127	323	0.704	0.987	17607	1
C2ORF15	-8.67	8	-2.23	0.0127	324	0.705	0.987	17606	1
TAP2	-8.66	8	-2.23	0.0128	325	0.707	0.987	17605	1
CELSR2	-8.65	8	-2.23	0.0129	326	0.707	0.987	17604	1
DKC1	-8.65	8	-2.23	0.0129	327	0.707	0.987	17603	1
RFC2	-8.64	8	-2.23	0.013	328	0.707	0.987	17602	1
NFAT5	-8.64	8	-2.23	0.013	329	0.707	0.987	17601	1
DCAF4L1	-8.63	8	-2.22	0.0131	330	0.707	0.987	17600	1
GDAP1	-8.62	8	-2.22	0.0132	331	0.707	0.987	17599	1
KRT33B	-8.62	8	-2.22	0.0132	332	0.707	0.987	17598	1
DDOST	-8.61	8	-2.22	0.0133	333	0.707	0.987	17597	1
NGFR	-8.6	8	-2.22	0.0134	334	0.707	0.987	17596	1
COX4I2	-8.6	8	-2.22	0.0134	335	0.707	0.987	17595	1
CIAO1	-8.6	8	-2.21	0.0134	336	0.707	0.987	17594	1
DLK1	-8.59	8	-2.21	0.0134	337	0.707	0.987	17593	1
OGT	-8.59	8	-2.21	0.0135	338	0.707	0.987	17592	1
C14orf177	-8.59	8	-2.21	0.0135	339	0.707	0.987	17591	1
ALDH4A1	-8.59	8	-2.21	0.0135	340	0.707	0.987	17590	1
PCDH8	-8.59	8	-2.21	0.0135	341	0.707	0.987	17589	1
CD5L	-8.59	8	-2.21	0.0135	342	0.707	0.987	17588	1
FBXO3	-8.58	8	-2.21	0.0135	343	0.707	0.986	17587	1
ATP5A1	-8.57	8	-2.21	0.0136	344	0.71	0.986	17586	1
PIK3R3	-8.57	8	-2.21	0.0137	345	0.71	0.986	17585	1
SLC22A17	-7.42	6	-2.21	0.0137	346	0.71	0.986	17584	1
GMNC	-8.56	8	-2.2	0.0138	347	0.711	0.986	17583	1
CNPY3	-8.55	8	-2.2	0.0138	348	0.712	0.986	17582	1
FEN1	-7.4	6	-2.2	0.0139	349	0.715	0.986	17581	1
PYROXD1	-8.54	8	-2.2	0.014	350	0.715	0.986	17580	1
TAF5	-8.53	8	-2.2	0.0141	351	0.719	0.986	17579	1
RSPO4	-8.52	8	-2.19	0.0142	352	0.721	0.986	17578	1
ARHGEF16	-8.51	8	-2.19	0.0142	353	0.722	0.986	17577	1
RNF40	-8.51	8	-2.19	0.0143	354	0.722	0.986	17576	1
BTBD18	-8.5	8	-2.19	0.0143	355	0.723	0.986	17575	1
ZNF808	-8.49	8	-2.19	0.0144	356	0.726	0.986	17574	1
YBX3	-8.47	8	-2.18	0.0147	357	0.736	0.985	17573	1
JRKL	-8.46	8	-2.18	0.0148	358	0.739	0.985	17572	1
HOXB6	-8.44	8	-2.17	0.0149	359	0.745	0.985	17571	1
DPT	-8.44	8	-2.17	0.015	360	0.746	0.985	17570	1
UCMA	-8.42	8	-2.17	0.0151	361	0.748	0.985	17569	1
TSPYL4	-8.42	8	-2.17	0.0152	362	0.748	0.985	17568	1
MMAB	-8.41	8	-2.16	0.0152	363	0.748	0.985	17567	1
SRF	-8.41	8	-2.16	0.0152	364	0.748	0.985	17566	1
ING1	-8.41	8	-2.16	0.0153	365	0.748	0.985	17565	1
KIAA0895L	-8.41	8	-2.16	0.0153	366	0.748	0.985	17564	1
POLR1E	-8.4	8	-2.16	0.0153	367	0.748	0.985	17563	1
FAM161A	-8.4	8	-2.16	0.0154	368	0.748	0.985	17562	1
RAE1	-8.39	8	-2.16	0.0155	369	0.748	0.985	17561	1
DLGAP4	-8.39	8	-2.16	0.0155	370	0.748	0.984	17560	1
CNGA3	-8.39	8	-2.16	0.0155	371	0.748	0.984	17559	1
RPTOR	-8.38	8	-2.16	0.0155	372	0.748	0.984	17558	1
SLC3A1	-8.38	8	-2.16	0.0156	373	0.749	0.984	17557	1
SLCO4A1	-8.37	8	-2.15	0.0157	374	0.751	0.984	17556	1
RFC1	-8.37	8	-2.15	0.0157	375	0.751	0.984	17555	1
ST6GALNAC6	-8.35	8	-2.15	0.0159	376	0.757	0.984	17554	1
ZNF335	-8.33	8	-2.14	0.0161	377	0.764	0.984	17553	1
TOX	-8.33	8	-2.14	0.0161	378	0.764	0.984	17552	1
LEUTX	-8.32	8	-2.14	0.0162	379	0.764	0.984	17551	1
THEMIS	-8.32	8	-2.14	0.0162	380	0.764	0.984	17550	1
MAGEB3	-8.32	8	-2.14	0.0162	381	0.764	0.984	17549	1
STRBP	-8.31	8	-2.14	0.0163	382	0.764	0.984	17548	1
ZNF503	-8.3	8	-2.13	0.0164	383	0.768	0.984	17547	1
KRT12	-8.3	8	-2.13	0.0165	384	0.768	0.984	17546	1
DNAJB1	-8.29	8	-2.13	0.0165	385	0.768	0.983	17545	1
KIF26A	-8.29	8	-2.13	0.0165	386	0.768	0.983	17544	1
ADD2	-8.29	8	-2.13	0.0166	387	0.768	0.983	17543	1
TGM5	-7.16	6	-2.12	0.0168	388	0.778	0.983	17542	1
F7	-8.25	8	-2.12	0.017	389	0.783	0.983	17541	1
HSPB8	-8.24	8	-2.12	0.0171	390	0.786	0.983	17540	1
SCN11A	-8.24	8	-2.12	0.0172	391	0.787	0.983	17539	1
CLPS	-8.23	8	-2.12	0.0172	392	0.787	0.983	17538	1
KIAA0922	-8.23	8	-2.11	0.0173	393	0.787	0.983	17537	1
TRAM1L1	-8.22	8	-2.11	0.0173	394	0.787	0.983	17536	1
VSX2	-8.22	8	-2.11	0.0174	395	0.789	0.983	17535	1
OLFM1	-8.21	8	-2.11	0.0174	396	0.789	0.983	17534	1
ACSBG2	-8.21	8	-2.11	0.0175	397	0.79	0.983	17533	1
CHST13	-8.2	8	-2.11	0.0176	398	0.792	0.982	17532	1
ENY2	-8.2	8	-2.11	0.0176	399	0.792	0.982	17531	1
FAIM2	-8.19	8	-2.1	0.0177	400	0.792	0.982	17530	1
PNPLA2	-8.19	8	-2.1	0.0178	401	0.792	0.982	17529	1
RAD50	-7.09	6	-2.1	0.0178	402	0.792	0.982	17528	1
C10orf85	-8.18	8	-2.1	0.0178	403	0.792	0.982	17527	1
DDAH1	-8.18	8	-2.1	0.0179	404	0.792	0.982	17526	1
MANSC4	-8.17	8	-2.1	0.0179	405	0.792	0.982	17525	1
MLXIPL	-8.17	8	-2.1	0.018	406	0.793	0.982	17524	1
INTS10	-8.16	8	-2.1	0.018	407	0.795	0.982	17523	1
CALHM3	-8.16	8	-2.09	0.0181	408	0.795	0.982	17522	1
ZIC5	-8.15	8	-2.09	0.0181	409	0.795	0.982	17521	1
TMCC2	-8.14	8	-2.09	0.0183	410	0.795	0.982	17520	1
UPF1	-7.05	6	-2.09	0.0183	411	0.795	0.982	17519	1
RARS2	-8.14	8	-2.09	0.0183	412	0.795	0.982	17518	1
SMARCC2	-8.14	8	-2.09	0.0183	413	0.795	0.982	17517	1
PDGFRA	-8.13	8	-2.09	0.0184	414	0.795	0.982	17516	1
LRRK1	-8.13	8	-2.09	0.0184	415	0.795	0.982	17515	1
SFTPD	-8.13	8	-2.09	0.0184	416	0.795	0.982	17514	1
PIANP	-8.12	8	-2.08	0.0186	417	0.799	0.981	17513	1
CCDC47	-8.11	8	-2.08	0.0187	418	0.801	0.981	17512	1
CENPO	-8.11	8	-2.08	0.0187	419	0.802	0.981	17511	1
NDUFB9	-8.09	8	-2.08	0.0189	420	0.802	0.981	17510	1
SH2D5	-8.09	8	-2.08	0.0189	421	0.802	0.981	17509	1
ENOPH1	-8.09	8	-2.08	0.0189	422	0.802	0.981	17508	1
STK10	-8.09	8	-2.08	0.0189	423	0.802	0.981	17507	1
HGFAC	-8.09	8	-2.08	0.019	424	0.803	0.981	17506	1
ARRB1	-6.99	6	-2.07	0.0191	425	0.805	0.981	17505	1
SLC22A11	-8.07	8	-2.07	0.0191	426	0.805	0.981	17504	1
TAL2	-8.07	8	-2.07	0.0192	427	0.806	0.981	17503	1
OR56A1	-8.06	8	-2.07	0.0193	428	0.807	0.981	17502	1
ORAI3	-8.06	8	-2.07	0.0194	429	0.807	0.981	17501	1
SP5	-8.06	8	-2.07	0.0194	430	0.807	0.981	17500	1
ADAM17	-8.05	8	-2.07	0.0194	431	0.808	0.981	17499	1
SORT1	-8.04	8	-2.06	0.0196	432	0.813	0.98	17498	1
ATP6V0D1	-8.03	8	-2.06	0.0196	433	0.813	0.98	17497	1
RSPH3	-8.03	8	-2.06	0.0197	434	0.813	0.98	17496	1
EGFR	-8.03	8	-2.06	0.0197	435	0.813	0.98	17495	1
SPEF1	-8.02	8	-2.06	0.0199	436	0.815	0.98	17494	1
VWA5B1	-8.01	8	-2.05	0.0199	437	0.815	0.98	17493	1
TDRD1	-8.01	8	-2.05	0.02	438	0.815	0.98	17492	1
AKAP14	-8.01	8	-2.05	0.02	439	0.815	0.98	17491	1
TADA2B	-8	8	-2.05	0.0201	440	0.815	0.98	17490	1
CCNA1	-8	8	-2.05	0.0201	441	0.815	0.98	17489	1
B3GNT8	-8	8	-2.05	0.0201	442	0.815	0.98	17488	1
CCR7	-8	8	-2.05	0.0202	443	0.815	0.98	17487	1
TOP1	-7.99	8	-2.05	0.0202	444	0.815	0.98	17486	1
SLC38A4	-7.98	8	-2.05	0.0204	445	0.82	0.98	17485	1
HOXC6	-7.97	8	-2.04	0.0205	446	0.823	0.98	17484	1
RFX7	-7.96	8	-2.04	0.0206	447	0.825	0.979	17483	1
BABAM1	-7.96	8	-2.04	0.0206	448	0.825	0.979	17482	1
TSSK3	-7.96	8	-2.04	0.0207	449	0.825	0.979	17481	1
RNF4	-7.95	8	-2.04	0.0207	450	0.825	0.979	17480	1
RAB32	-7.93	8	-2.03	0.0211	451	0.836	0.979	17479	1
RND1	-7.93	8	-2.03	0.0211	452	0.836	0.979	17478	1
FBXO45	-7.92	8	-2.03	0.0212	453	0.837	0.979	17477	1
DDX6	-7.92	8	-2.03	0.0212	454	0.837	0.979	17476	1
KIRREL2	-7.91	8	-2.03	0.0213	455	0.837	0.979	17475	1
ATP6V1C1	-7.91	8	-2.03	0.0213	456	0.837	0.979	17474	1
FOXI1	-7.9	8	-2.03	0.0214	457	0.837	0.979	17473	1
FGFR1OP2	-7.9	8	-2.03	0.0214	458	0.837	0.979	17472	1
MAN1A1	-7.9	8	-2.02	0.0214	459	0.837	0.979	17471	1
TMEM219	-7.9	8	-2.02	0.0215	460	0.839	0.978	17470	1
BRK1	-7.89	8	-2.02	0.0216	461	0.84	0.978	17469	1
CXCR1	-7.86	8	-2.01	0.022	462	0.849	0.978	17468	1
FOXD2	-7.86	8	-2.01	0.022	463	0.849	0.978	17467	1
RASL10B	-7.86	8	-2.01	0.022	464	0.849	0.978	17466	1
SPOCK3	-7.86	8	-2.01	0.0221	465	0.851	0.978	17465	1
SIGLEC9	-7.83	8	-2.01	0.0224	466	0.856	0.978	17464	1
FDX1L	-7.83	8	-2.01	0.0224	467	0.856	0.978	17463	1
LRRTM2	-7.83	8	-2	0.0225	468	0.856	0.978	17462	1
EMC3	-7.83	8	-2	0.0225	469	0.856	0.978	17461	1
C21orf58	-7.83	8	-2	0.0225	470	0.856	0.978	17460	1
TMCO3	-7.83	8	-2	0.0225	471	0.856	0.977	17459	1
EDN2	-7.82	8	-2	0.0225	472	0.856	0.977	17458	1
SETD1A	-7.82	8	-2	0.0226	473	0.856	0.977	17457	1
RFC5	-7.82	8	-2	0.0226	474	0.856	0.977	17456	1
TRPC5	-7.81	8	-2	0.0228	475	0.86	0.977	17455	1
BTBD3	-7.8	8	-2	0.0229	476	0.86	0.977	17454	1
GGH	-7.8	8	-2	0.0229	477	0.86	0.977	17453	1
GLUL	-7.79	8	-1.99	0.0231	478	0.86	0.977	17452	1
CLASRP	-7.79	8	-1.99	0.0231	479	0.86	0.977	17451	1
RXFP3	-7.79	8	-1.99	0.0231	480	0.86	0.977	17450	1
KCNA10	-7.78	8	-1.99	0.0231	481	0.86	0.977	17449	1
MXD4	-7.78	8	-1.99	0.0232	482	0.86	0.977	17448	1
SLC39A9	-7.77	8	-1.99	0.0233	483	0.86	0.977	17447	1
KRT79	-7.77	8	-1.99	0.0233	484	0.86	0.977	17446	1
SLC25A28	-7.75	8	-1.99	0.0236	485	0.86	0.976	17445	1
SAP30L	-7.75	8	-1.98	0.0236	486	0.86	0.976	17444	1
SIGIRR	-7.75	8	-1.98	0.0236	487	0.86	0.976	17443	1
FSIP2	-7.75	8	-1.98	0.0236	488	0.86	0.976	17442	1
ARL8B	-7.75	8	-1.98	0.0237	489	0.86	0.976	17441	1
ANKRD52	-6.71	6	-1.98	0.0237	490	0.86	0.976	17440	1
CDH1	-7.74	8	-1.98	0.0239	491	0.86	0.976	17439	1
C5orf48	-7.73	8	-1.98	0.0239	492	0.86	0.976	17438	1
DHX38	-7.73	8	-1.98	0.0239	493	0.86	0.976	17437	1
LRRC49	-7.73	8	-1.98	0.0239	494	0.86	0.976	17436	1
DPEP1	-7.73	8	-1.98	0.024	495	0.86	0.976	17435	1
ANO9	-7.73	8	-1.98	0.024	496	0.86	0.976	17434	1
OR6B2	-6.69	6	-1.98	0.024	497	0.86	0.976	17433	1
GMEB2	-7.72	8	-1.98	0.0241	498	0.86	0.976	17432	1
NIPAL3	-7.72	8	-1.98	0.0241	499	0.86	0.976	17431	1
IGFALS	-7.72	8	-1.97	0.0242	500	0.86	0.976	17430	1
KDM4D	-7.71	8	-1.97	0.0242	501	0.86	0.976	17429	1
KCNF1	-7.71	8	-1.97	0.0242	502	0.86	0.976	17428	1
CD81	-7.71	8	-1.97	0.0242	503	0.86	0.976	17427	1
RALYL	-7.71	8	-1.97	0.0242	504	0.86	0.976	17426	1
EBI3	-7.71	8	-1.97	0.0243	505	0.86	0.976	17425	1
ADAM10	-7.7	8	-1.97	0.0244	506	0.86	0.976	17424	1
LAMA5	-7.7	8	-1.97	0.0244	507	0.86	0.976	17423	1
TRIP10	-7.7	8	-1.97	0.0244	508	0.86	0.976	17422	1
GRIN2C	-7.69	8	-1.97	0.0245	509	0.862	0.975	17421	1
TIMM10	-7.69	8	-1.97	0.0246	510	0.862	0.975	17420	1
RAP1GAP2	-7.69	8	-1.97	0.0246	511	0.862	0.975	17419	1
RAB31	-7.68	8	-1.97	0.0247	512	0.863	0.975	17418	1
LPAR5	-7.68	8	-1.97	0.0247	513	0.863	0.975	17417	1
WNK1	-7.67	8	-1.96	0.0249	514	0.866	0.975	17416	1
ZSWIM2	-7.67	8	-1.96	0.0249	515	0.866	0.975	17415	1
HOXD12	-7.67	8	-1.96	0.0249	516	0.866	0.975	17414	1
GANAB	-7.66	8	-1.96	0.025	517	0.867	0.975	17413	1
SERBP1	-7.66	8	-1.96	0.0251	518	0.868	0.975	17412	1
ATP6V0A1	-7.65	8	-1.96	0.0252	519	0.869	0.975	17411	1
SSSCA1	-7.65	8	-1.96	0.0252	520	0.869	0.975	17410	1
KIAA1324	-7.65	8	-1.96	0.0253	521	0.869	0.975	17409	1
NEGR1	-7.62	8	-1.95	0.0256	522	0.879	0.974	17408	1
CCSAP	-7.62	8	-1.95	0.0256	523	0.879	0.974	17407	1
SARNP	-7.62	8	-1.95	0.0257	524	0.88	0.974	17406	1
PM20D1	-7.61	8	-1.95	0.0258	525	0.88	0.974	17405	1
TMEM86B	-7.61	8	-1.94	0.0259	526	0.88	0.974	17404	1
C14orf79	-6.59	6	-1.94	0.0259	527	0.88	0.974	17403	1
CDHR4	-7.6	8	-1.94	0.026	528	0.88	0.974	17402	1
ARR3	-7.6	8	-1.94	0.026	529	0.88	0.974	17401	1
TECTB	-7.6	8	-1.94	0.026	530	0.88	0.974	17400	1
HSPA12B	-7.59	8	-1.94	0.0262	531	0.882	0.974	17399	1
HELB	-7.59	8	-1.94	0.0263	532	0.882	0.974	17398	1
RNASEL	-7.58	8	-1.94	0.0263	533	0.882	0.974	17397	1
POU4F2	-7.58	8	-1.94	0.0263	534	0.882	0.974	17396	1
LRRC30	-7.58	8	-1.94	0.0264	535	0.882	0.974	17395	1
NAGPA	-7.58	8	-1.94	0.0264	536	0.882	0.974	17394	1
CRX	-7.58	8	-1.94	0.0264	537	0.882	0.974	17393	1
LILRB3	-3.78	2	-1.93	0.0265	538	0.884	0.973	17392	1
OR6K6	-7.56	8	-1.93	0.0266	539	0.884	0.973	17391	1
ARL15	-7.56	8	-1.93	0.0267	540	0.884	0.973	17390	1
KPNA3	-7.56	8	-1.93	0.0267	541	0.884	0.973	17389	1
GCH1	-7.55	8	-1.93	0.0268	542	0.884	0.973	17388	1
IGJ	-7.55	8	-1.93	0.0268	543	0.884	0.973	17387	1
RNF219	-7.55	8	-1.93	0.0269	544	0.885	0.973	17386	1
OPN1LW	-3.77	2	-1.93	0.0269	545	0.885	0.973	17385	1
FKBP5	-7.54	8	-1.93	0.027	546	0.885	0.973	17384	1
SLC9A2	-7.53	8	-1.93	0.0271	547	0.889	0.973	17383	1
TRAK1	-7.52	8	-1.92	0.0273	548	0.889	0.973	17382	1
KIAA1737	-7.52	8	-1.92	0.0273	549	0.889	0.973	17381	1
TCEAL8	-7.52	8	-1.92	0.0273	550	0.889	0.973	17380	1
RFC3	-7.52	8	-1.92	0.0274	551	0.889	0.973	17379	1
TMEM151A	-7.52	8	-1.92	0.0274	552	0.889	0.973	17378	1
CCDC13	-7.51	8	-1.92	0.0274	553	0.89	0.973	17377	1
GRASP	-7.51	8	-1.92	0.0276	554	0.893	0.972	17376	1
ZNF157	-7.5	8	-1.92	0.0277	555	0.895	0.972	17375	1
CLPTM1L	-7.49	8	-1.91	0.0278	556	0.896	0.972	17374	1
IFNAR1	-7.48	8	-1.91	0.028	557	0.896	0.972	17373	1
FBXL6	-7.48	8	-1.91	0.028	558	0.896	0.972	17372	1
RAP1B	-3.74	2	-1.91	0.0281	559	0.896	0.972	17371	1
ZNF592	-7.48	8	-1.91	0.0281	560	0.896	0.972	17370	1
HNRNPF	-7.48	8	-1.91	0.0281	561	0.896	0.972	17369	1
FLNA	-7.48	8	-1.91	0.0281	562	0.896	0.972	17368	1
BLM	-7.47	8	-1.91	0.0281	563	0.896	0.972	17367	1
CLTA	-7.47	8	-1.91	0.0282	564	0.896	0.972	17366	1
CPNE8	-7.47	8	-1.91	0.0282	565	0.896	0.972	17365	1
U2AF1	-7.45	8	-1.9	0.0285	566	0.896	0.971	17364	1
NPC1L1	-7.45	8	-1.9	0.0286	567	0.896	0.971	17363	1
TMEM92	-7.45	8	-1.9	0.0286	568	0.896	0.971	17362	1
PSD2	-7.44	8	-1.9	0.0287	569	0.896	0.971	17361	1
NPAS1	-7.44	8	-1.9	0.0288	570	0.896	0.971	17360	1
LRCH3	-7.43	8	-1.9	0.0288	571	0.896	0.971	17359	1
RASSF4	-7.43	8	-1.9	0.0289	572	0.896	0.971	17358	1
NRL	-7.42	8	-1.9	0.029	573	0.896	0.971	17357	1
SMG7	-7.42	8	-1.89	0.0291	574	0.896	0.971	17356	1
RERG	-7.42	8	-1.89	0.0291	575	0.896	0.971	17355	1
PPDPF	-7.41	8	-1.89	0.0292	576	0.896	0.971	17354	1
MAP2K1	-7.41	8	-1.89	0.0293	577	0.896	0.971	17353	1
CCDC41	-7.41	8	-1.89	0.0293	578	0.896	0.971	17352	1
NTN1	-7.41	8	-1.89	0.0294	579	0.896	0.971	17351	1
TNFRSF10A	-7.41	8	-1.89	0.0294	580	0.896	0.971	17350	1
L3HYPDH	-7.4	8	-1.89	0.0294	581	0.896	0.971	17349	1
HIST1H2BA	-7.4	8	-1.89	0.0294	582	0.896	0.971	17348	1
ALDH1A3	-7.4	8	-1.89	0.0294	583	0.896	0.971	17347	1
POLDIP3	-7.4	8	-1.89	0.0295	584	0.896	0.971	17346	1
TMPO	-7.4	8	-1.89	0.0296	585	0.896	0.97	17345	1
ZNF561	-7.4	8	-1.89	0.0296	586	0.896	0.97	17344	1
ZNF74	-7.39	8	-1.89	0.0296	587	0.896	0.97	17343	1
TTK	-7.39	8	-1.89	0.0296	588	0.896	0.97	17342	1
MT4	-6.4	6	-1.88	0.0297	589	0.896	0.97	17341	1
CBX7	-7.39	8	-1.88	0.0297	590	0.896	0.97	17340	1
2021-09-08	-7.38	8	-1.88	0.0297	591	0.896	0.97	17339	1
ASAH1	-7.38	8	-1.88	0.0297	592	0.896	0.97	17338	1
NDRG4	-7.38	8	-1.88	0.0298	593	0.896	0.97	17337	1
C11orf94	-7.38	8	-1.88	0.0298	594	0.896	0.97	17336	1
HDDC2	-7.38	8	-1.88	0.0298	595	0.896	0.97	17335	1
APOA4	-7.38	8	-1.88	0.0299	596	0.896	0.97	17334	1
CCSER1	-7.38	8	-1.88	0.0299	597	0.896	0.97	17333	1
SEC31B	-7.37	8	-1.88	0.0299	598	0.896	0.97	17332	1
HSCB	-7.37	8	-1.88	0.0299	599	0.896	0.97	17331	1
HRH1	-7.37	8	-1.88	0.03	600	0.896	0.97	17330	1
POU3F4	-7.36	8	-1.88	0.0302	601	0.896	0.97	17329	1
UGT1A9	-3.68	2	-1.88	0.0302	602	0.896	0.97	17328	1
GOT1L1	-7.36	8	-1.88	0.0302	603	0.896	0.97	17327	1
RELT	-7.36	8	-1.88	0.0302	604	0.896	0.97	17326	1
NCBP2	-6.88	7	-1.88	0.0303	605	0.896	0.97	17325	1
CD27	-7.36	8	-1.88	0.0303	606	0.896	0.97	17324	1
EIF3G	-7.35	8	-1.88	0.0304	607	0.897	0.97	17323	1
FOXP3	-7.35	8	-1.87	0.0304	608	0.897	0.97	17322	1
EDF1	-7.35	8	-1.87	0.0305	609	0.897	0.97	17321	1
WRAP53	-7.34	8	-1.87	0.0306	610	0.899	0.969	17320	1
DLC1	-7.33	8	-1.87	0.0307	611	0.899	0.969	17319	1
LRRIQ3	-7.33	8	-1.87	0.0307	612	0.899	0.969	17318	1
CLDND1	-7.33	8	-1.87	0.0308	613	0.901	0.969	17317	1
TPBG	-7.32	8	-1.87	0.0309	614	0.902	0.969	17316	1
CIB1	-7.31	8	-1.87	0.0311	615	0.902	0.969	17315	1
IP6K3	-7.31	8	-1.86	0.0311	616	0.902	0.969	17314	1
TSHR	-7.31	8	-1.86	0.0311	617	0.902	0.969	17313	1
PURA	-7.31	8	-1.86	0.0311	618	0.902	0.969	17312	1
DENND5A	-7.31	8	-1.86	0.0311	619	0.902	0.969	17311	1
LYSMD2	-7.31	8	-1.86	0.0312	620	0.902	0.969	17310	1
LOXL2	-7.3	8	-1.86	0.0313	621	0.903	0.969	17309	1
GPR37L1	-7.3	8	-1.86	0.0313	622	0.903	0.969	17308	1
IGFBP4	-7.29	8	-1.86	0.0315	623	0.906	0.968	17307	1
IDO2	-7.28	8	-1.86	0.0316	624	0.906	0.968	17306	1
SYNPR	-7.27	8	-1.85	0.0318	625	0.906	0.968	17305	1
UNC119B	-7.27	8	-1.85	0.0318	626	0.906	0.968	17304	1
MAPK8	-7.27	8	-1.85	0.0319	627	0.906	0.968	17303	1
UACA	-7.27	8	-1.85	0.0319	628	0.906	0.968	17302	1
DMAP1	-7.27	8	-1.85	0.0319	629	0.906	0.968	17301	1
PELI3	-7.27	8	-1.85	0.0319	630	0.906	0.968	17300	1
CACNA1S	-7.27	8	-1.85	0.032	631	0.906	0.968	17299	1
CEBPB	-7.27	8	-1.85	0.032	632	0.906	0.968	17298	1
CRLS1	-7.27	8	-1.85	0.032	633	0.906	0.968	17297	1
NFE2L3	-7.26	8	-1.85	0.0321	634	0.907	0.968	17296	1
SYCP3	-7.26	8	-1.85	0.0322	635	0.907	0.968	17295	1
NUP62CL	-7.25	8	-1.85	0.0323	636	0.907	0.968	17294	1
C11orf73	-7.25	8	-1.85	0.0323	637	0.907	0.968	17293	1
DPPA2	-7.24	8	-1.85	0.0324	638	0.907	0.968	17292	1
THBS4	-7.24	8	-1.85	0.0325	639	0.907	0.968	17291	1
SEPW1	-7.24	8	-1.84	0.0326	640	0.907	0.967	17290	1
NT5C1A	-7.24	8	-1.84	0.0326	641	0.907	0.967	17289	1
GATAD1	-7.24	8	-1.84	0.0326	642	0.907	0.967	17288	1
PRMT8	-7.23	8	-1.84	0.0327	643	0.907	0.967	17287	1
POLR3B	-7.23	8	-1.84	0.0328	644	0.907	0.967	17286	1
PTX4	-7.23	8	-1.84	0.0328	645	0.907	0.967	17285	1
INCENP	-7.22	8	-1.84	0.0328	646	0.907	0.967	17284	1
ADCK4	-7.22	8	-1.84	0.0329	647	0.907	0.967	17283	1
LAMA1	-7.22	8	-1.84	0.0329	648	0.907	0.967	17282	1
GPR183	-7.22	8	-1.84	0.033	649	0.907	0.967	17281	1
CST4	-6.25	6	-1.84	0.033	650	0.907	0.967	17280	1
DND1	-7.21	8	-1.84	0.033	651	0.907	0.967	17279	1
DUSP15	-7.21	8	-1.84	0.0331	652	0.907	0.967	17278	1
PTGFRN	-7.21	8	-1.84	0.0331	653	0.907	0.967	17277	1
CEP120	-7.21	8	-1.84	0.0332	654	0.907	0.967	17276	1
RAD23B	-7.2	8	-1.83	0.0333	655	0.907	0.967	17275	1
DSC1	-7.2	8	-1.83	0.0333	656	0.907	0.967	17274	1
MAGEB1	-7.2	8	-1.83	0.0333	657	0.907	0.967	17273	1
LBX1	-7.2	8	-1.83	0.0333	658	0.907	0.967	17272	1
TMEM101	-7.2	8	-1.83	0.0333	659	0.907	0.967	17271	1
TOMM7	-7.2	8	-1.83	0.0334	660	0.907	0.967	17270	1
OLIG1	-7.19	8	-1.83	0.0335	661	0.908	0.966	17269	1
GDNF	-7.19	8	-1.83	0.0336	662	0.908	0.966	17268	1
PPT2	-7.18	8	-1.83	0.0336	663	0.908	0.966	17267	1
PRAM1	-7.18	8	-1.83	0.0336	664	0.908	0.966	17266	1
FAM104A	-7.18	8	-1.83	0.0337	665	0.908	0.966	17265	1
OR3A1	-7.17	8	-1.83	0.0338	666	0.91	0.966	17264	1
ZNF215	-7.17	8	-1.83	0.0338	667	0.91	0.966	17263	1
MYF6	-7.17	8	-1.83	0.0339	668	0.91	0.966	17262	1
ADRBK2	-7.17	8	-1.83	0.034	669	0.91	0.966	17261	1
PAK6	-7.15	8	-1.82	0.0342	670	0.916	0.966	17260	1
SCAPER	-7.15	8	-1.82	0.0344	671	0.918	0.966	17259	1
SSH3	-7.14	8	-1.82	0.0345	672	0.919	0.965	17258	1
FAM159B	-7.14	8	-1.82	0.0346	673	0.919	0.965	17257	1
MCM10	-7.14	8	-1.82	0.0346	674	0.919	0.965	17256	1
ZNF277	-7.13	8	-1.82	0.0347	675	0.919	0.965	17255	1
PGK1	-7.13	8	-1.82	0.0347	676	0.919	0.965	17254	1
GPSM3	-7.13	8	-1.82	0.0347	677	0.919	0.965	17253	1
PNPLA7	-7.13	8	-1.81	0.0348	678	0.919	0.965	17252	1
PDZD9	-7.12	8	-1.81	0.0349	679	0.919	0.965	17251	1
SH2D3C	-7.12	8	-1.81	0.0349	680	0.919	0.965	17250	1
CNOT4	-7.12	8	-1.81	0.0349	681	0.919	0.965	17249	1
C1orf61	-7.12	8	-1.81	0.035	682	0.92	0.965	17248	1
HIST1H4C	-6.16	6	-1.81	0.0351	683	0.92	0.965	17247	1
ADAL	-7.11	8	-1.81	0.0351	684	0.92	0.965	17246	1
BRD3	-7.11	8	-1.81	0.0353	685	0.92	0.965	17245	1
OR2T27	-3.55	2	-1.81	0.0353	686	0.92	0.965	17244	1
PLA2G1B	-7.1	8	-1.81	0.0353	687	0.92	0.965	17243	1
GABRG2	-7.1	8	-1.81	0.0354	688	0.92	0.965	17242	1
SOD3	-7.1	8	-1.81	0.0354	689	0.92	0.965	17241	1
UEVLD	-7.09	8	-1.8	0.0356	690	0.92	0.964	17240	1
SCAMP2	-7.09	8	-1.8	0.0357	691	0.92	0.964	17239	1
SCARA3	-7.08	8	-1.8	0.0358	692	0.92	0.964	17238	1
KHDRBS2	-7.08	8	-1.8	0.0358	693	0.92	0.964	17237	1
FBXW9	-7.08	8	-1.8	0.0358	694	0.92	0.964	17236	1
PRAP1	-7.08	8	-1.8	0.0359	695	0.92	0.964	17235	1
C19orf25	-7.08	8	-1.8	0.0359	696	0.92	0.964	17234	1
SYVN1	-7.08	8	-1.8	0.0359	697	0.92	0.964	17233	1
C1QL3	-7.07	8	-1.8	0.0361	698	0.92	0.964	17232	1
SLMAP	-7.07	8	-1.8	0.0361	699	0.92	0.964	17231	1
OLR1	-7.06	8	-1.8	0.0361	700	0.92	0.964	17230	1
TMX1	-7.06	8	-1.8	0.0362	701	0.92	0.964	17229	1
TRIM47	-7.06	8	-1.8	0.0362	702	0.92	0.964	17228	1
NDUFB8	-7.06	8	-1.8	0.0362	703	0.92	0.964	17227	1
ATXN7L3B	-7.06	8	-1.8	0.0362	704	0.92	0.964	17226	1
FBXO47	-7.06	8	-1.8	0.0362	705	0.92	0.964	17225	1
DENND1A	-7.05	8	-1.79	0.0365	706	0.92	0.964	17224	1
SHROOM1	-7.05	8	-1.79	0.0365	707	0.92	0.964	17223	1
SIX5	-7.04	8	-1.79	0.0366	708	0.92	0.963	17222	1
ZNF93	-4.98	4	-1.79	0.0366	709	0.92	0.963	17221	1
FBXO5	-7.04	8	-1.79	0.0366	710	0.92	0.963	17220	1
GARS	-7.04	8	-1.79	0.0367	711	0.92	0.963	17219	1
ERLIN2	-7.04	8	-1.79	0.0367	712	0.92	0.963	17218	1
DNAJC28	-7.04	8	-1.79	0.0367	713	0.92	0.963	17217	1
HTRA4	-7.04	8	-1.79	0.0367	714	0.92	0.963	17216	1
MBTPS2	-6.09	6	-1.79	0.0368	715	0.92	0.963	17215	1
RASSF9	-7.04	8	-1.79	0.0368	716	0.92	0.963	17214	1
CHTOP	-7.03	8	-1.79	0.0368	717	0.92	0.963	17213	1
DAD1	-7.02	8	-1.79	0.0371	718	0.924	0.963	17212	1
CLCN3	-7.02	8	-1.78	0.0372	719	0.924	0.963	17211	1
ARL8A	-7.02	8	-1.78	0.0372	720	0.924	0.963	17210	1
HN1	-7.01	8	-1.78	0.0373	721	0.924	0.963	17209	1
CHST2	-7	8	-1.78	0.0374	722	0.924	0.963	17208	1
TIMM8B	-6.99	8	-1.78	0.0377	723	0.924	0.962	17207	1
GCN1L1	-6.99	8	-1.78	0.0378	724	0.924	0.962	17206	1
HSP90AA1	-6.99	8	-1.78	0.0378	725	0.924	0.962	17205	1
PCGF2	-6.99	8	-1.78	0.0378	726	0.924	0.962	17204	1
CCDC126	-6.99	8	-1.78	0.0378	727	0.924	0.962	17203	1
SSTR1	-6.99	8	-1.78	0.0378	728	0.924	0.962	17202	1
CST9L	-6.05	6	-1.78	0.0379	729	0.924	0.962	17201	1
BMP4	-6.99	8	-1.78	0.0379	730	0.924	0.962	17200	1
PRIMPOL	-6.98	8	-1.78	0.0379	731	0.924	0.962	17199	1
SRPX2	-6.98	8	-1.77	0.038	732	0.924	0.962	17198	1
PLLP	-6.98	8	-1.77	0.038	733	0.924	0.962	17197	1
WFDC10A	-4.93	4	-1.77	0.0381	734	0.924	0.962	17196	1
ZADH2	-6.97	8	-1.77	0.0382	735	0.924	0.962	17195	1
SFMBT2	-6.97	8	-1.77	0.0382	736	0.924	0.962	17194	1
PDHA1	-6.97	8	-1.77	0.0383	737	0.924	0.962	17193	1
NEK8	-6.97	8	-1.77	0.0383	738	0.924	0.962	17192	1
SLC17A6	-6.97	8	-1.77	0.0383	739	0.924	0.962	17191	1
TESK2	-6.96	8	-1.77	0.0383	740	0.924	0.962	17190	1
TREML4	-6.96	8	-1.77	0.0384	741	0.924	0.962	17189	1
CCNK	-6.51	7	-1.77	0.0385	742	0.924	0.962	17188	1
PHYHIPL	-6.96	8	-1.77	0.0385	743	0.924	0.962	17187	1
C12orf44	-6.95	8	-1.77	0.0386	744	0.924	0.961	17186	1
KISS1	-6.02	6	-1.77	0.0386	745	0.924	0.961	17185	1
ALB	-6.95	8	-1.77	0.0386	746	0.924	0.961	17184	1
RPL35A	-6.01	6	-1.76	0.0388	747	0.924	0.961	17183	1
NDC80	-6.94	8	-1.76	0.0388	748	0.924	0.961	17182	1
IQCH	-6.94	8	-1.76	0.0388	749	0.924	0.961	17181	1
C17orf64	-6.94	8	-1.76	0.0389	750	0.924	0.961	17180	1
MARS	-6.94	8	-1.76	0.039	751	0.924	0.961	17179	1
AK8	-6.94	8	-1.76	0.039	752	0.924	0.961	17178	1
AR	-6.94	8	-1.76	0.039	753	0.924	0.961	17177	1
KCNK16	-6.94	8	-1.76	0.039	754	0.924	0.961	17176	1
HERC4	-6.93	8	-1.76	0.0391	755	0.924	0.961	17175	1
APH1A	-6.93	8	-1.76	0.0392	756	0.924	0.961	17174	1
MRPL40	-6.92	8	-1.76	0.0393	757	0.924	0.961	17173	1
OR13H1	-6.92	8	-1.76	0.0393	758	0.924	0.961	17172	1
SLC36A3	-6.92	8	-1.76	0.0393	759	0.924	0.961	17171	1
TSPAN2	-6.92	8	-1.76	0.0393	760	0.924	0.961	17170	1
PIAS3	-6.92	8	-1.76	0.0394	761	0.924	0.961	17169	1
CDK8	-6.92	8	-1.76	0.0394	762	0.924	0.961	17168	1
ARFGAP3	-6.92	8	-1.76	0.0394	763	0.924	0.961	17167	1
PRTFDC1	-6.92	8	-1.76	0.0394	764	0.924	0.961	17166	1
PMPCA	-6.92	8	-1.76	0.0395	765	0.924	0.961	17165	1
SPEN	-6.91	8	-1.76	0.0396	766	0.924	0.96	17164	1
EXTL3	-6.9	8	-1.75	0.0397	767	0.924	0.96	17163	1
DNAH14	-6.9	8	-1.75	0.0397	768	0.924	0.96	17162	1
2021-09-09	-6.9	8	-1.75	0.0398	769	0.924	0.96	17161	1
CENPBD1	-6.9	8	-1.75	0.0398	770	0.924	0.96	17160	1
STX7	-6.9	8	-1.75	0.0398	771	0.924	0.96	17159	1
RPRD1B	-6.9	8	-1.75	0.0398	772	0.924	0.96	17158	1
C16orf78	-6.9	8	-1.75	0.0399	773	0.924	0.96	17157	1
CABP7	-5.97	6	-1.75	0.04	774	0.924	0.96	17156	1
EN2	-6.89	8	-1.75	0.0401	775	0.924	0.96	17155	1
DDHD2	-6.88	8	-1.75	0.0402	776	0.924	0.96	17154	1
MAFF	-6.88	8	-1.75	0.0402	777	0.924	0.96	17153	1
DNAH3	-6.88	8	-1.75	0.0402	778	0.924	0.96	17152	1
CYP46A1	-6.88	8	-1.75	0.0403	779	0.924	0.96	17151	1
OTOP1	-6.88	8	-1.75	0.0404	780	0.924	0.96	17150	1
MPP7	-6.87	8	-1.75	0.0405	781	0.924	0.96	17149	1
TRABD	-6.87	8	-1.74	0.0405	782	0.924	0.959	17148	1
TTC24	-6.87	8	-1.74	0.0405	783	0.924	0.959	17147	1
HPDL	-6.87	8	-1.74	0.0405	784	0.924	0.959	17146	1
PSME2	-6.87	8	-1.74	0.0406	785	0.924	0.959	17145	1
EYA3	-6.87	8	-1.74	0.0406	786	0.924	0.959	17144	1
ERI3	-6.87	8	-1.74	0.0406	787	0.924	0.959	17143	1
OR6C65	-6.87	8	-1.74	0.0406	788	0.924	0.959	17142	1
ZNF354B	-6.86	8	-1.74	0.0407	789	0.924	0.959	17141	1
LRRC23	-6.86	8	-1.74	0.0408	790	0.925	0.959	17140	1
C2orf88	-6.86	8	-1.74	0.0409	791	0.925	0.959	17139	1
KCNJ5	-6.86	8	-1.74	0.0409	792	0.925	0.959	17138	1
NEMF	-6.85	8	-1.74	0.041	793	0.925	0.959	17137	1
LMTK3	-6.85	8	-1.74	0.041	794	0.925	0.959	17136	1
TRIM56	-6.85	8	-1.74	0.041	795	0.925	0.959	17135	1
TPRXL	-5.93	6	-1.74	0.041	796	0.925	0.959	17134	1
PCDHB16	-6.84	8	-1.74	0.0413	797	0.928	0.959	17133	1
FHIT	-6.84	8	-1.74	0.0413	798	0.928	0.959	17132	1
MCM5	-6.83	8	-1.73	0.0414	799	0.93	0.959	17131	1
EXD3	-6.83	8	-1.73	0.0415	800	0.93	0.958	17130	1
MOB1A	-6.83	8	-1.73	0.0416	801	0.93	0.958	17129	1
THUMPD1	-6.82	8	-1.73	0.0417	802	0.93	0.958	17128	1
ETV3L	-6.82	8	-1.73	0.0417	803	0.93	0.958	17127	1
PLXDC1	-6.82	8	-1.73	0.0417	804	0.93	0.958	17126	1
BGLAP	-6.82	8	-1.73	0.0418	805	0.93	0.958	17125	1
ZNF674	-6.81	8	-1.73	0.0419	806	0.93	0.958	17124	1
ATP6V1H	-6.81	8	-1.73	0.0419	807	0.93	0.958	17123	1
CLMN	-6.81	8	-1.73	0.042	808	0.93	0.958	17122	1
FAM126B	-6.81	8	-1.73	0.042	809	0.93	0.958	17121	1
DACT2	-6.81	8	-1.73	0.0421	810	0.93	0.958	17120	1
PIEZO2	-6.8	8	-1.73	0.0421	811	0.93	0.958	17119	1
THRA	-6.8	8	-1.73	0.0421	812	0.93	0.958	17118	1
LCE3A	-6.8	8	-1.73	0.0422	813	0.93	0.958	17117	1
ATCAY	-6.8	8	-1.72	0.0423	814	0.93	0.958	17116	1
GBAS	-6.79	8	-1.72	0.0424	815	0.93	0.958	17115	1
WASF1	-6.79	8	-1.72	0.0425	816	0.93	0.958	17114	1
TRMT1L	-6.79	8	-1.72	0.0425	817	0.93	0.957	17113	1
NCKIPSD	-6.79	8	-1.72	0.0425	818	0.93	0.957	17112	1
ATG9A	-6.79	8	-1.72	0.0426	819	0.93	0.957	17111	1
UCHL1	-6.78	8	-1.72	0.0426	820	0.93	0.957	17110	1
PEMT	-6.78	8	-1.72	0.0426	821	0.93	0.957	17109	1
HEXB	-6.78	8	-1.72	0.0427	822	0.93	0.957	17108	1
GPSM2	-6.78	8	-1.72	0.0427	823	0.93	0.957	17107	1
PODNL1	-6.77	8	-1.72	0.0428	824	0.931	0.957	17106	1
MMRN2	-6.77	8	-1.72	0.0429	825	0.931	0.957	17105	1
NOTCH2	-6.77	8	-1.72	0.0429	826	0.931	0.957	17104	1
CYP8B1	-6.77	8	-1.72	0.043	827	0.931	0.957	17103	1
SLC16A12	-6.76	8	-1.71	0.0432	828	0.931	0.957	17102	1
RPL18A	-5.34	5	-1.71	0.0433	829	0.931	0.957	17101	1
TMEM181	-6.76	8	-1.71	0.0433	830	0.931	0.957	17100	1
GPRASP1	-6.75	8	-1.71	0.0434	831	0.931	0.957	17099	1
ZMIZ1	-6.75	8	-1.71	0.0434	832	0.931	0.957	17098	1
PTCHD4	-6.75	8	-1.71	0.0435	833	0.931	0.957	17097	1
GATSL3	-6.75	8	-1.71	0.0435	834	0.931	0.956	17096	1
PRRT1	-5.84	6	-1.71	0.0436	835	0.931	0.956	17095	1
FNBP1	-6.74	8	-1.71	0.0436	836	0.931	0.956	17094	1
P2RX3	-6.74	8	-1.71	0.0437	837	0.931	0.956	17093	1
EFCAB5	-6.74	8	-1.71	0.0437	838	0.931	0.956	17092	1
IKZF5	-6.74	8	-1.71	0.0437	839	0.931	0.956	17091	1
TGFB3	-6.74	8	-1.71	0.0437	840	0.931	0.956	17090	1
FTHL17	-6.74	8	-1.71	0.0438	841	0.931	0.956	17089	1
C1QL4	-5.83	6	-1.71	0.0438	842	0.931	0.956	17088	1
PHKA1	-6.74	8	-1.71	0.0438	843	0.931	0.956	17087	1
LRRC52	-6.74	8	-1.71	0.0438	844	0.931	0.956	17086	1
PIP	-4.76	4	-1.71	0.044	845	0.932	0.956	17085	1
KIFC1	-6.73	8	-1.71	0.044	846	0.932	0.956	17084	1
LYAR	-6.73	8	-1.71	0.0441	847	0.932	0.956	17083	1
PCLO	-6.72	8	-1.7	0.0441	848	0.932	0.956	17082	1
RHBDF1	-6.72	8	-1.7	0.0442	849	0.932	0.956	17081	1
BFAR	-6.72	8	-1.7	0.0442	850	0.932	0.956	17080	1
FSTL3	-6.72	8	-1.7	0.0442	851	0.932	0.956	17079	1
SLC7A5	-6.72	8	-1.7	0.0443	852	0.932	0.956	17078	1
GP1BA	-6.71	8	-1.7	0.0444	853	0.932	0.956	17077	1
IKZF2	-6.71	8	-1.7	0.0444	854	0.932	0.956	17076	1
POLR2B	-6.71	8	-1.7	0.0445	855	0.932	0.956	17075	1
APOBEC2	-6.71	8	-1.7	0.0446	856	0.932	0.955	17074	1
LRTM2	-6.71	8	-1.7	0.0446	857	0.932	0.955	17073	1
PSTPIP1	-6.7	8	-1.7	0.0446	858	0.932	0.955	17072	1
MAD2L1	-6.7	8	-1.7	0.0448	859	0.932	0.955	17071	1
FFAR1	-6.7	8	-1.7	0.0448	860	0.932	0.955	17070	1
DEGS1	-6.7	8	-1.7	0.0448	861	0.932	0.955	17069	1
ZNF18	-6.7	8	-1.7	0.0448	862	0.932	0.955	17068	1
MLEC	-6.69	8	-1.7	0.0449	863	0.932	0.955	17067	1
FAM84A	-6.69	8	-1.7	0.045	864	0.932	0.955	17066	1
FUT11	-6.69	8	-1.7	0.045	865	0.932	0.955	17065	1
CPD	-6.69	8	-1.7	0.045	866	0.932	0.955	17064	1
CHD2	-6.69	8	-1.69	0.0451	867	0.932	0.955	17063	1
ATP6AP1L	-6.68	8	-1.69	0.0451	868	0.932	0.955	17062	1
TEX19	-6.67	8	-1.69	0.0454	869	0.934	0.955	17061	1
GNMT	-6.67	8	-1.69	0.0454	870	0.934	0.955	17060	1
ENTHD1	-6.67	8	-1.69	0.0455	871	0.934	0.954	17059	1
ARHGDIB	-6.67	8	-1.69	0.0455	872	0.934	0.954	17058	1
NCF4	-6.67	8	-1.69	0.0455	873	0.934	0.954	17057	1
PAFAH1B3	-6.67	8	-1.69	0.0456	874	0.934	0.954	17056	1
LAMA4	-6.67	8	-1.69	0.0456	875	0.935	0.954	17055	1
SRL	-5.77	6	-1.69	0.0457	876	0.935	0.954	17054	1
PRDM14	-6.66	8	-1.69	0.0458	877	0.935	0.954	17053	1
THEG	-6.65	8	-1.69	0.0459	878	0.935	0.954	17052	1
NUGGC	-6.65	8	-1.69	0.046	879	0.935	0.954	17051	1
PHKB	-6.65	8	-1.69	0.046	880	0.935	0.954	17050	1
USP15	-6.65	8	-1.68	0.046	881	0.935	0.954	17049	1
PDLIM4	-6.65	8	-1.68	0.046	882	0.935	0.954	17048	1
NEIL1	-6.65	8	-1.68	0.0461	883	0.935	0.954	17047	1
PC	-6.64	8	-1.68	0.0462	884	0.935	0.954	17046	1
PWWP2B	-6.64	8	-1.68	0.0462	885	0.935	0.954	17045	1
LIMA1	-6.64	8	-1.68	0.0463	886	0.935	0.954	17044	1
TRDMT1	-6.63	8	-1.68	0.0465	887	0.935	0.954	17043	1
EWSR1	-6.63	8	-1.68	0.0466	888	0.935	0.953	17042	1
NUDT21	-6.63	8	-1.68	0.0466	889	0.935	0.953	17041	1
MLH1	-5.74	6	-1.68	0.0466	890	0.935	0.953	17040	1
MRPL45	-6.63	8	-1.68	0.0466	891	0.935	0.953	17039	1
CREBZF	-6.62	8	-1.68	0.0467	892	0.935	0.953	17038	1
C19orf38	-6.62	8	-1.68	0.0468	893	0.935	0.953	17037	1
SYAP1	-6.62	8	-1.68	0.0468	894	0.935	0.953	17036	1
ATRAID	-6.62	8	-1.68	0.0469	895	0.935	0.953	17035	1
SUCLA2	-6.61	8	-1.67	0.0471	896	0.935	0.953	17034	1
DEFB129	-6.61	8	-1.67	0.0471	897	0.935	0.953	17033	1
CCBL2	-6.61	8	-1.67	0.0472	898	0.935	0.953	17032	1
SPATA33	-6.18	7	-1.67	0.0472	899	0.935	0.953	17031	1
IL17RA	-6.6	8	-1.67	0.0473	900	0.935	0.953	17030	1
SAYSD1	-6.6	8	-1.67	0.0474	901	0.935	0.953	17029	1
ST3GAL1	-6.6	8	-1.67	0.0474	902	0.935	0.953	17028	1
SLC30A2	-6.59	8	-1.67	0.0475	903	0.935	0.953	17027	1
SURF2	-6.59	8	-1.67	0.0475	904	0.935	0.953	17026	1
TAPBPL	-6.59	8	-1.67	0.0475	905	0.935	0.952	17025	1
CNTFR	-6.59	8	-1.67	0.0476	906	0.935	0.952	17024	1
RPL15	-3.3	2	-1.67	0.0476	907	0.935	0.952	17023	1
NEUROD2	-6.59	8	-1.67	0.0476	908	0.935	0.952	17022	1
NMUR2	-6.59	8	-1.67	0.0477	909	0.935	0.952	17021	1
PPP1R3F	-6.58	8	-1.67	0.0478	910	0.935	0.952	17020	1
ARID4B	-6.58	8	-1.67	0.0478	911	0.935	0.952	17019	1
INPP5J	-6.58	8	-1.67	0.0478	912	0.935	0.952	17018	1
WIPI2	-6.58	8	-1.67	0.0478	913	0.935	0.952	17017	1
CELA3B	-3.29	2	-1.67	0.0479	914	0.935	0.952	17016	1
TMEM30B	-6.58	8	-1.66	0.048	915	0.935	0.952	17015	1
AFAP1	-6.57	8	-1.66	0.0481	916	0.935	0.952	17014	1
USP33	-6.57	8	-1.66	0.0481	917	0.935	0.952	17013	1
COIL	-6.57	8	-1.66	0.0482	918	0.935	0.952	17012	1
PRKCZ	-6.57	8	-1.66	0.0482	919	0.935	0.952	17011	1
XPO5	-6.57	8	-1.66	0.0483	920	0.935	0.952	17010	1
TRAF4	-6.56	8	-1.66	0.0483	921	0.935	0.952	17009	1
DICER1	-6.56	8	-1.66	0.0485	922	0.935	0.952	17008	1
CCR10	-6.56	8	-1.66	0.0485	923	0.935	0.951	17007	1
FAM114A1	-6.56	8	-1.66	0.0485	924	0.935	0.951	17006	1
CELA1	-6.56	8	-1.66	0.0486	925	0.935	0.951	17005	1
CTHRC1	-6.55	8	-1.66	0.0486	926	0.935	0.951	17004	1
MDM2	-6.55	8	-1.66	0.0486	927	0.935	0.951	17003	1
TNFRSF18	-6.55	8	-1.66	0.0487	928	0.935	0.951	17002	1
CYP51A1	-6.55	8	-1.66	0.0488	929	0.935	0.951	17001	1
C8orf47	-6.55	8	-1.66	0.0488	930	0.935	0.951	17000	1
MEIS1	-6.55	8	-1.66	0.0488	931	0.935	0.951	16999	1
ZNF280C	-6.54	8	-1.66	0.0489	932	0.935	0.951	16998	1
RNASEH2C	-6.54	8	-1.66	0.0489	933	0.935	0.951	16997	1
NOP16	-6.54	8	-1.66	0.0489	934	0.935	0.951	16996	1
WNT4	-6.54	8	-1.66	0.0489	935	0.935	0.951	16995	1
C9orf171	-6.54	8	-1.66	0.0489	936	0.935	0.951	16994	1
NR4A1	-6.54	8	-1.65	0.049	937	0.935	0.951	16993	1
KLF16	-6.54	8	-1.65	0.049	938	0.935	0.951	16992	1
SPRYD3	-6.54	8	-1.65	0.0491	939	0.935	0.951	16991	1
SIGLEC6	-6.53	8	-1.65	0.0492	940	0.935	0.951	16990	1
STRC	-6.53	8	-1.65	0.0492	941	0.935	0.951	16989	1
PAX8	-6.53	8	-1.65	0.0492	942	0.935	0.951	16988	1
LRRC40	-6.53	8	-1.65	0.0492	943	0.935	0.951	16987	1
POLR2J2	-3.26	2	-1.65	0.0494	944	0.935	0.951	16986	1
PNPLA1	-6.53	8	-1.65	0.0494	945	0.935	0.951	16985	1
ANAPC4	-6.53	8	-1.65	0.0494	946	0.935	0.951	16984	1
BZW1	-6.52	8	-1.65	0.0495	947	0.935	0.951	16983	1
SNED1	-6.52	8	-1.65	0.0496	948	0.935	0.95	16982	1
STX11	-6.52	8	-1.65	0.0496	949	0.935	0.95	16981	1
TCEAL4	-6.52	8	-1.65	0.0497	950	0.935	0.95	16980	1
C14orf142	-5.64	6	-1.65	0.0497	951	0.935	0.95	16979	1
SLC15A1	-6.51	8	-1.65	0.0498	952	0.935	0.95	16978	1
COX10	-6.51	8	-1.65	0.0499	953	0.935	0.95	16977	1
GALM	-6.51	8	-1.65	0.0499	954	0.935	0.95	16976	1
FAM21B	-3.25	2	-1.65	0.0499	955	0.935	0.95	16975	1
CABS1	-6.51	8	-1.65	0.05	956	0.935	0.95	16974	1
BBC3	-6.5	8	-1.64	0.05	957	0.935	0.95	16973	1
AC079612.1	-6.5	8	-1.64	0.05	958	0.935	0.95	16972	1
GAA	-6.5	8	-1.64	0.05	959	0.935	0.95	16971	1
KIAA1551	-6.5	8	-1.64	0.0501	960	0.935	0.95	16970	1
RNASEH2B	-6.5	8	-1.64	0.0502	961	0.935	0.95	16969	1
C16orf71	-6.49	8	-1.64	0.0502	962	0.935	0.95	16968	1
ATP7B	-6.49	8	-1.64	0.0505	963	0.935	0.95	16967	1
AC106876.2	-6.48	8	-1.64	0.0507	964	0.935	0.949	16966	1
HAND2	-6.48	8	-1.64	0.0507	965	0.935	0.949	16965	1
RPLP0	-6.06	7	-1.64	0.0507	966	0.935	0.949	16964	1
CASZ1	-6.48	8	-1.64	0.0508	967	0.935	0.949	16963	1
PTGIS	-6.47	8	-1.64	0.0508	968	0.935	0.949	16962	1
IQSEC3	-6.47	8	-1.64	0.0508	969	0.935	0.949	16961	1
MUTYH	-6.47	8	-1.64	0.0509	970	0.935	0.949	16960	1
ZDHHC1	-6.47	8	-1.64	0.0509	971	0.935	0.949	16959	1
LGALS4	-6.47	8	-1.64	0.0509	972	0.935	0.949	16958	1
SETD7	-6.47	8	-1.64	0.051	973	0.935	0.949	16957	1
SSX2IP	-6.47	8	-1.64	0.051	974	0.935	0.949	16956	1
SUMO2	-3.23	2	-1.63	0.051	975	0.935	0.949	16955	1
NIPSNAP3A	-6.47	8	-1.63	0.051	976	0.935	0.949	16954	1
LYPD3	-6.47	8	-1.63	0.0511	977	0.935	0.949	16953	1
BARHL1	-6.46	8	-1.63	0.0511	978	0.935	0.949	16952	1
PAX3	-6.46	8	-1.63	0.0511	979	0.935	0.949	16951	1
PLA2G3	-6.46	8	-1.63	0.0512	980	0.935	0.949	16950	1
DAK	-6.46	8	-1.63	0.0512	981	0.935	0.949	16949	1
FAM170B	-6.46	8	-1.63	0.0512	982	0.935	0.949	16948	1
NDST4	-6.46	8	-1.63	0.0514	983	0.937	0.949	16947	1
PEX26	-6.45	8	-1.63	0.0515	984	0.937	0.948	16946	1
IRG1	-6.45	8	-1.63	0.0515	985	0.937	0.948	16945	1
NANOS2	-6.45	8	-1.63	0.0516	986	0.937	0.948	16944	1
ANKRD2	-6.44	8	-1.63	0.0518	987	0.94	0.948	16943	1
BOC	-6.44	8	-1.63	0.0518	988	0.94	0.948	16942	1
PCF11	-6.44	8	-1.63	0.0519	989	0.941	0.948	16941	1
ENPP5	-6.43	8	-1.63	0.052	990	0.941	0.948	16940	1
RCOR3	-6.43	8	-1.63	0.052	991	0.941	0.948	16939	1
GDF5OS	-6.43	8	-1.62	0.0522	992	0.943	0.948	16938	1
WDR33	-6.42	8	-1.62	0.0523	993	0.943	0.948	16937	1
CTBP2	-6.42	8	-1.62	0.0523	994	0.943	0.948	16936	1
HDAC7	-6.42	8	-1.62	0.0524	995	0.944	0.948	16935	1
ATG16L2	-6.42	8	-1.62	0.0524	996	0.944	0.948	16934	1
PBDC1	-6.42	8	-1.62	0.0525	997	0.944	0.948	16933	1
CFTR	-6.41	8	-1.62	0.0526	998	0.944	0.947	16932	1
E2F5	-6.41	8	-1.62	0.0526	999	0.944	0.947	16931	1
SLC5A1	-6.41	8	-1.62	0.0527	1000	0.944	0.947	16930	1
ZNF568	-6.41	8	-1.62	0.0527	1001	0.944	0.947	16929	1
TNFRSF13B	-6.4	8	-1.62	0.0529	1002	0.945	0.947	16928	1
TRPM5	-6.4	8	-1.62	0.053	1003	0.945	0.947	16927	1
MNAT1	-6.4	8	-1.62	0.053	1004	0.945	0.947	16926	1
JMY	-6.4	8	-1.62	0.053	1005	0.945	0.947	16925	1
CCDC88C	-6.4	8	-1.62	0.053	1006	0.945	0.947	16924	1
TRAFD1	-6.39	8	-1.62	0.0531	1007	0.946	0.947	16923	1
CDK20	-6.39	8	-1.61	0.0532	1008	0.946	0.947	16922	1
UCP1	-6.39	8	-1.61	0.0532	1009	0.946	0.947	16921	1
SLC4A9	-6.39	8	-1.61	0.0534	1010	0.948	0.947	16920	1
SLC16A7	-6.38	8	-1.61	0.0535	1011	0.948	0.947	16919	1
HAND1	-6.38	8	-1.61	0.0535	1012	0.948	0.946	16918	1
C17orf75	-6.38	8	-1.61	0.0537	1013	0.949	0.946	16917	1
KIAA1468	-6.38	8	-1.61	0.0537	1014	0.949	0.946	16916	1
UBL4B	-6.37	8	-1.61	0.054	1015	0.953	0.946	16915	1
CXorf56	-6.37	8	-1.61	0.054	1016	0.953	0.946	16914	1
PDE2A	-5.03	5	-1.61	0.0542	1017	0.953	0.946	16913	1
PRDM13	-6.36	8	-1.61	0.0542	1018	0.953	0.946	16912	1
ZNF169	-6.36	8	-1.61	0.0542	1019	0.953	0.946	16911	1
POLG	-6.36	8	-1.6	0.0543	1020	0.953	0.946	16910	1
DEFB128	-5.5	6	-1.6	0.0543	1021	0.953	0.946	16909	1
OSBPL10	-6.35	8	-1.6	0.0544	1022	0.953	0.946	16908	1
CALML5	-6.35	8	-1.6	0.0545	1023	0.953	0.946	16907	1
EIF4A1	-6.35	8	-1.6	0.0545	1024	0.953	0.945	16906	1
ARSF	-6.35	8	-1.6	0.0546	1025	0.953	0.945	16905	1
ABCB1	-6.35	8	-1.6	0.0546	1026	0.953	0.945	16904	1
KLF17	-6.35	8	-1.6	0.0546	1027	0.953	0.945	16903	1
PCDH10	-6.34	8	-1.6	0.0547	1028	0.954	0.945	16902	1
RB1CC1	-6.34	8	-1.6	0.0549	1029	0.954	0.945	16901	1
LRRC55	-6.33	8	-1.6	0.055	1030	0.954	0.945	16900	1
CYP4F2	-6.33	8	-1.6	0.055	1031	0.954	0.945	16899	1
ZHX1	-6.33	8	-1.6	0.055	1032	0.954	0.945	16898	1
CYR61	-6.33	8	-1.6	0.0551	1033	0.954	0.945	16897	1
CT47B1	-6.33	8	-1.6	0.0551	1034	0.954	0.945	16896	1
RPL23	-5.48	6	-1.6	0.0551	1035	0.954	0.945	16895	1
FAM83A	-6.33	8	-1.6	0.0552	1036	0.954	0.945	16894	1
RAI1	-6.33	8	-1.6	0.0552	1037	0.954	0.945	16893	1
SMS	-6.32	8	-1.59	0.0554	1038	0.954	0.945	16892	1
FKBP6	-6.32	8	-1.59	0.0554	1039	0.954	0.945	16891	1
KIAA1191	-6.32	8	-1.59	0.0554	1040	0.954	0.945	16890	1
CAAP1	-6.31	8	-1.59	0.0556	1041	0.954	0.944	16889	1
UTY	-6.31	8	-1.59	0.0556	1042	0.954	0.944	16888	1
PTCHD3	-6.31	8	-1.59	0.0556	1043	0.954	0.944	16887	1
MYBPC2	-6.31	8	-1.59	0.0557	1044	0.954	0.944	16886	1
WNT1	-6.31	8	-1.59	0.0557	1045	0.954	0.944	16885	1
MED22	-6.31	8	-1.59	0.0558	1046	0.954	0.944	16884	1
ARMC4	-6.3	8	-1.59	0.0558	1047	0.954	0.944	16883	1
PPIL4	-6.3	8	-1.59	0.0559	1048	0.954	0.944	16882	1
TYW5	-6.3	8	-1.59	0.056	1049	0.954	0.944	16881	1
E2F3	-6.3	8	-1.59	0.056	1050	0.954	0.944	16880	1
KIAA0408	-6.3	8	-1.59	0.056	1051	0.954	0.944	16879	1
TSPAN13	-6.29	8	-1.59	0.0562	1052	0.954	0.944	16878	1
SLK	-6.29	8	-1.59	0.0562	1053	0.954	0.944	16877	1
TIMP2	-6.29	8	-1.59	0.0562	1054	0.954	0.944	16876	1
HEYL	-6.29	8	-1.59	0.0562	1055	0.954	0.944	16875	1
SLC38A6	-6.29	8	-1.59	0.0563	1056	0.954	0.944	16874	1
SLFN14	-6.29	8	-1.59	0.0563	1057	0.954	0.944	16873	1
DCLRE1A	-6.29	8	-1.59	0.0563	1058	0.954	0.944	16872	1
PSRC1	-6.29	8	-1.59	0.0563	1059	0.954	0.944	16871	1
SCARF2	-6.29	8	-1.59	0.0564	1060	0.954	0.944	16870	1
ANKFY1	-6.28	8	-1.59	0.0565	1061	0.954	0.944	16869	1
C9orf89	-6.28	8	-1.58	0.0566	1062	0.954	0.943	16868	1
ZFHX4	-6.28	8	-1.58	0.0566	1063	0.954	0.943	16867	1
CMPK1	-6.28	8	-1.58	0.0567	1064	0.954	0.943	16866	1
PDPK1	-6.28	8	-1.58	0.0568	1065	0.954	0.943	16865	1
PAX6	-6.27	8	-1.58	0.0568	1066	0.954	0.943	16864	1
ATXN7L3	-6.27	8	-1.58	0.0568	1067	0.954	0.943	16863	1
SFMBT1	-6.27	8	-1.58	0.0568	1068	0.954	0.943	16862	1
LRRN4CL	-6.27	8	-1.58	0.0569	1069	0.954	0.943	16861	1
TMEM229B	-6.27	8	-1.58	0.0569	1070	0.954	0.943	16860	1
OR4A15	-6.26	8	-1.58	0.0571	1071	0.955	0.943	16859	1
H1F0	-6.26	8	-1.58	0.0572	1072	0.956	0.943	16858	1
ADCY2	-6.26	8	-1.58	0.0573	1073	0.957	0.943	16857	1
HIC2	-6.26	8	-1.58	0.0574	1074	0.957	0.943	16856	1
MASP1	-6.26	8	-1.58	0.0574	1075	0.957	0.943	16855	1
SPDEF	-6.25	8	-1.58	0.0575	1076	0.957	0.943	16854	1
KRT73	-6.25	8	-1.58	0.0575	1077	0.957	0.942	16853	1
PLA2G4B	-3.12	2	-1.57	0.0577	1078	0.957	0.942	16852	1
ATP1B1	-6.24	8	-1.57	0.0577	1079	0.957	0.942	16851	1
TAF3	-6.24	8	-1.57	0.0578	1080	0.957	0.942	16850	1
SPRY4	-6.24	8	-1.57	0.0579	1081	0.957	0.942	16849	1
PRKD1	-6.24	8	-1.57	0.0579	1082	0.957	0.942	16848	1
ANKRD36C	-6.24	8	-1.57	0.058	1083	0.957	0.942	16847	1
OTUD3	-6.23	8	-1.57	0.0581	1084	0.957	0.942	16846	1
DDR2	-6.23	8	-1.57	0.0582	1085	0.957	0.942	16845	1
MOBP	-6.23	8	-1.57	0.0582	1086	0.957	0.942	16844	1
TSTA3	-6.23	8	-1.57	0.0582	1087	0.957	0.942	16843	1
KIRREL3	-6.23	8	-1.57	0.0582	1088	0.957	0.942	16842	1
C14orf23	-6.22	8	-1.57	0.0584	1089	0.957	0.942	16841	1
GMIP	-6.22	8	-1.57	0.0585	1090	0.957	0.942	16840	1
LANCL3	-6.22	8	-1.57	0.0585	1091	0.957	0.942	16839	1
ARHGDIA	-6.22	8	-1.57	0.0585	1092	0.957	0.941	16838	1
ANO8	-6.21	8	-1.57	0.0587	1093	0.957	0.941	16837	1
GADD45A	-6.21	8	-1.57	0.0587	1094	0.957	0.941	16836	1
RNF166	-6.21	8	-1.57	0.0588	1095	0.957	0.941	16835	1
UTP18	-6.21	8	-1.56	0.0588	1096	0.957	0.941	16834	1
TMEM249	-6.21	8	-1.56	0.0588	1097	0.957	0.941	16833	1
RPL3	-6.21	8	-1.56	0.0588	1098	0.957	0.941	16832	1
NUP62	-6.21	8	-1.56	0.0589	1099	0.957	0.941	16831	1
SYF2	-6.21	8	-1.56	0.0589	1100	0.957	0.941	16830	1
SLC11A1	-6.21	8	-1.56	0.0589	1101	0.957	0.941	16829	1
GPR25	-6.2	8	-1.56	0.0591	1102	0.957	0.941	16828	1
SPOCD1	-6.2	8	-1.56	0.0591	1103	0.957	0.941	16827	1
CMIP	-6.2	8	-1.56	0.0592	1104	0.957	0.941	16826	1
PEAR1	-6.2	8	-1.56	0.0592	1105	0.957	0.941	16825	1
VGLL3	-6.2	8	-1.56	0.0592	1106	0.957	0.941	16824	1
ATIC	-6.2	8	-1.56	0.0592	1107	0.957	0.941	16823	1
PSIP1	-6.19	8	-1.56	0.0594	1108	0.957	0.941	16822	1
CDKL1	-6.19	8	-1.56	0.0594	1109	0.957	0.941	16821	1
PRDX3	-6.19	8	-1.56	0.0594	1110	0.957	0.941	16820	1
PAGE5	-6.19	8	-1.56	0.0594	1111	0.957	0.941	16819	1
C17orf102	-6.19	8	-1.56	0.0594	1112	0.957	0.941	16818	1
CCDC107	-6.19	8	-1.56	0.0595	1113	0.957	0.941	16817	1
ECE2	-6.19	8	-1.56	0.0595	1114	0.957	0.941	16816	1
ATF3	-6.19	8	-1.56	0.0595	1115	0.957	0.94	16815	1
SLC16A5	-6.19	8	-1.56	0.0596	1116	0.957	0.94	16814	1
MCM4	-6.18	8	-1.56	0.0597	1117	0.957	0.94	16813	1
DNAJA4	-6.18	8	-1.56	0.0597	1118	0.957	0.94	16812	1
ZNF777	-5.35	6	-1.56	0.0598	1119	0.957	0.94	16811	1
NCSTN	-6.18	8	-1.56	0.0598	1120	0.957	0.94	16810	1
CCDC150	-6.17	8	-1.56	0.06	1121	0.959	0.94	16809	1
TTC34	-6.17	8	-1.55	0.0601	1122	0.96	0.94	16808	1
SPTAN1	-6.17	8	-1.55	0.0602	1123	0.96	0.94	16807	1
AIMP2	-6.16	8	-1.55	0.0603	1124	0.96	0.94	16806	1
TMED8	-6.16	8	-1.55	0.0603	1125	0.96	0.94	16805	1
ZNF7	-6.16	8	-1.55	0.0604	1126	0.96	0.94	16804	1
TMEM210	-6.16	8	-1.55	0.0604	1127	0.96	0.94	16803	1
SMOX	-6.16	8	-1.55	0.0604	1128	0.96	0.94	16802	1
WIF1	-6.16	8	-1.55	0.0605	1129	0.96	0.94	16801	1
NEU1	-6.16	8	-1.55	0.0605	1130	0.96	0.939	16800	1
FANCB	-6.15	8	-1.55	0.0607	1131	0.962	0.939	16799	1
STX8	-6.15	8	-1.55	0.0609	1132	0.964	0.939	16798	1
PANX2	-6.14	8	-1.55	0.0609	1133	0.964	0.939	16797	1
GDPGP1	-6.14	8	-1.55	0.061	1134	0.964	0.939	16796	1
PLEKHG3	-6.14	8	-1.55	0.0611	1135	0.964	0.939	16795	1
ARHGAP4	-6.14	8	-1.54	0.0612	1136	0.964	0.939	16794	1
NCAPD2	-6.14	8	-1.54	0.0612	1137	0.964	0.939	16793	1
IBTK	-6.13	8	-1.54	0.0612	1138	0.964	0.939	16792	1
ABHD16A	-6.13	8	-1.54	0.0613	1139	0.964	0.939	16791	1
SNTN	-6.13	8	-1.54	0.0614	1140	0.964	0.939	16790	1
IPO13	-6.13	8	-1.54	0.0615	1141	0.964	0.938	16789	1
SLAMF7	-6.13	8	-1.54	0.0615	1142	0.964	0.938	16788	1
NICN1	-6.12	8	-1.54	0.0616	1143	0.964	0.938	16787	1
FKBP1B	-6.12	8	-1.54	0.0616	1144	0.964	0.938	16786	1
CLEC14A	-6.12	8	-1.54	0.0617	1145	0.964	0.938	16785	1
CYB5D2	-6.12	8	-1.54	0.0617	1146	0.964	0.938	16784	1
CCP110	-6.12	8	-1.54	0.0617	1147	0.964	0.938	16783	1
TTC38	-6.12	8	-1.54	0.0617	1148	0.964	0.938	16782	1
ZCCHC11	-6.12	8	-1.54	0.0618	1149	0.964	0.938	16781	1
PSMG2	-6.12	8	-1.54	0.0618	1150	0.964	0.938	16780	1
OR10H4	-6.11	8	-1.54	0.0619	1151	0.964	0.938	16779	1
DRP2	-6.11	8	-1.54	0.0619	1152	0.964	0.938	16778	1
RHOT1	-6.11	8	-1.54	0.062	1153	0.964	0.938	16777	1
ARHGEF39	-6.11	8	-1.54	0.0621	1154	0.966	0.938	16776	1
CHAT	-6.1	8	-1.54	0.0622	1155	0.966	0.938	16775	1
GPRASP2	-6.1	8	-1.54	0.0623	1156	0.966	0.938	16774	1
CPLX1	-6.1	8	-1.54	0.0623	1157	0.966	0.938	16773	1
PPARA	-6.1	8	-1.54	0.0624	1158	0.966	0.938	16772	1
PDP1	-6.1	8	-1.53	0.0625	1159	0.966	0.938	16771	1
DLG5	-6.1	8	-1.53	0.0625	1160	0.966	0.938	16770	1
CD1D	-6.09	8	-1.53	0.0627	1161	0.966	0.937	16769	1
EBP	-6.09	8	-1.53	0.0627	1162	0.966	0.937	16768	1
PALB2	-6.09	8	-1.53	0.0628	1163	0.966	0.937	16767	1
DCUN1D1	-6.09	8	-1.53	0.0628	1164	0.966	0.937	16766	1
RFX1	-6.09	8	-1.53	0.0628	1165	0.966	0.937	16765	1
RBP3	-6.09	8	-1.53	0.0629	1166	0.966	0.937	16764	1
SUGP2	-6.08	8	-1.53	0.063	1167	0.966	0.937	16763	1
DTX1	-6.08	8	-1.53	0.063	1168	0.966	0.937	16762	1
RAB4A	-6.08	8	-1.53	0.063	1169	0.966	0.937	16761	1
RPL36	-6.08	8	-1.53	0.0631	1170	0.966	0.937	16760	1
GJA5	-6.08	8	-1.53	0.0631	1171	0.966	0.937	16759	1
PECR	-6.08	8	-1.53	0.0632	1172	0.967	0.937	16758	1
ZNF506	-5.26	6	-1.53	0.0633	1173	0.968	0.937	16757	1
MKL1	-6.07	8	-1.53	0.0635	1174	0.968	0.937	16756	1
PTH1R	-5.68	7	-1.53	0.0635	1175	0.968	0.937	16755	1
CFL1	-6.07	8	-1.53	0.0635	1176	0.968	0.937	16754	1
ATAD3B	-6.06	8	-1.53	0.0636	1177	0.969	0.936	16753	1
KIAA0226	-6.06	8	-1.52	0.0638	1178	0.971	0.936	16752	1
HS3ST3B1	-6.05	8	-1.52	0.0641	1179	0.971	0.936	16751	1
PPP2R5D	-6.05	8	-1.52	0.0642	1180	0.971	0.936	16750	1
DLEU1	-6.05	8	-1.52	0.0642	1181	0.971	0.936	16749	1
CTTNBP2	-6.05	8	-1.52	0.0642	1182	0.971	0.936	16748	1
MAT2A	-6.05	8	-1.52	0.0642	1183	0.971	0.936	16747	1
KRT74	-6.05	8	-1.52	0.0642	1184	0.971	0.936	16746	1
CYP2C8	-6.05	8	-1.52	0.0642	1185	0.971	0.936	16745	1
TIGD4	-6.04	8	-1.52	0.0643	1186	0.971	0.936	16744	1
FAM127B	-3.02	2	-1.52	0.0644	1187	0.971	0.936	16743	1
FUT3	-6.04	8	-1.52	0.0644	1188	0.971	0.936	16742	1
DAB2	-6.04	8	-1.52	0.0645	1189	0.971	0.936	16741	1
KLK14	-6.04	8	-1.52	0.0645	1190	0.971	0.936	16740	1
FADS3	-6.04	8	-1.52	0.0645	1191	0.971	0.936	16739	1
ACSF2	-6.03	8	-1.52	0.0647	1192	0.971	0.935	16738	1
PCDH15	-6.03	8	-1.52	0.0647	1193	0.971	0.935	16737	1
VPS8	-6.03	8	-1.52	0.0647	1194	0.971	0.935	16736	1
MSANTD3	-6.03	8	-1.52	0.0648	1195	0.971	0.935	16735	1
MUL1	-6.03	8	-1.52	0.0648	1196	0.971	0.935	16734	1
AHRR	-6.03	8	-1.52	0.0648	1197	0.971	0.935	16733	1
FAM19A2	-6.03	8	-1.51	0.0649	1198	0.972	0.935	16732	1
NUDT14	-5.21	6	-1.51	0.0651	1199	0.973	0.935	16731	1
SERPINI1	-6.02	8	-1.51	0.0652	1200	0.973	0.935	16730	1
APC	-6.02	8	-1.51	0.0652	1201	0.973	0.935	16729	1
SNRK	-6.01	8	-1.51	0.0653	1202	0.973	0.935	16728	1
THAP4	-6.01	8	-1.51	0.0653	1203	0.973	0.935	16727	1
OR4A16	-6.01	8	-1.51	0.0654	1204	0.973	0.935	16726	1
MORC3	-6.01	8	-1.51	0.0654	1205	0.973	0.935	16725	1
STK24	-6.01	8	-1.51	0.0655	1206	0.973	0.934	16724	1
DCAF17	-6.01	8	-1.51	0.0655	1207	0.973	0.934	16723	1
ZBTB26	-6.01	8	-1.51	0.0655	1208	0.973	0.934	16722	1
MN1	-6	8	-1.51	0.0656	1209	0.973	0.934	16721	1
HSPB9	-6	8	-1.51	0.0657	1210	0.973	0.934	16720	1
IQCD	-6	8	-1.51	0.0657	1211	0.973	0.934	16719	1
MRC2	-6	8	-1.51	0.0658	1212	0.973	0.934	16718	1
MTFR2	-6	8	-1.51	0.0658	1213	0.973	0.934	16717	1
TMPRSS11A	-6	8	-1.51	0.0659	1214	0.973	0.934	16716	1
CDK5R1	-6	8	-1.51	0.0659	1215	0.973	0.934	16715	1
C1orf177	-5.99	8	-1.51	0.0661	1216	0.974	0.934	16714	1
PIH1D2	-5.99	8	-1.51	0.0661	1217	0.974	0.934	16713	1
WNT5B	-5.99	8	-1.5	0.0663	1218	0.976	0.934	16712	1
C12orf76	-5.98	8	-1.5	0.0663	1219	0.976	0.934	16711	1
TARBP1	-5.98	8	-1.5	0.0665	1220	0.977	0.933	16710	1
DNAJB12	-5.98	8	-1.5	0.0666	1221	0.977	0.933	16709	1
DDN	-5.98	8	-1.5	0.0667	1222	0.978	0.933	16708	1
ACVR2B	-5.97	8	-1.5	0.0669	1223	0.981	0.933	16707	1
SOGA3	-5.97	8	-1.5	0.067	1224	0.981	0.933	16706	1
RETSAT	-5.97	8	-1.5	0.067	1225	0.981	0.933	16705	1
RAB1B	-5.96	8	-1.5	0.0671	1226	0.981	0.933	16704	1
RPS14	-5.96	8	-1.5	0.0672	1227	0.981	0.933	16703	1
ZFP91	-5.96	8	-1.5	0.0673	1228	0.981	0.933	16702	1
DAXX	-5.96	8	-1.5	0.0673	1229	0.981	0.933	16701	1
FAM171B	-5.96	8	-1.5	0.0673	1230	0.981	0.933	16700	1
LZTS3	-5.95	8	-1.5	0.0674	1231	0.981	0.933	16699	1
GPR179	-5.95	8	-1.49	0.0675	1232	0.981	0.933	16698	1
PPME1	-5.95	8	-1.49	0.0676	1233	0.981	0.932	16697	1
VPS28	-5.95	8	-1.49	0.0677	1234	0.981	0.932	16696	1
SH3BP4	-5.95	8	-1.49	0.0677	1235	0.981	0.932	16695	1
ADORA2A	-5.95	8	-1.49	0.0677	1236	0.981	0.932	16694	1
ZFP28	-5.95	8	-1.49	0.0677	1237	0.981	0.932	16693	1
GPS1	-5.95	8	-1.49	0.0677	1238	0.981	0.932	16692	1
LRIF1	-5.94	8	-1.49	0.0679	1239	0.981	0.932	16691	1
ADIRF	-5.93	8	-1.49	0.0681	1240	0.981	0.932	16690	1
OR2AG1	-5.93	8	-1.49	0.0681	1241	0.981	0.932	16689	1
PCBD1	-5.93	8	-1.49	0.0682	1242	0.981	0.932	16688	1
SPOPL	-5.93	8	-1.49	0.0683	1243	0.981	0.932	16687	1
LHFPL4	-5.93	8	-1.49	0.0683	1244	0.981	0.932	16686	1
RPS6KB2	-5.93	8	-1.49	0.0684	1245	0.981	0.932	16685	1
CD14	-5.93	8	-1.49	0.0684	1246	0.981	0.932	16684	1
NEFH	-5.92	8	-1.49	0.0685	1247	0.981	0.931	16683	1
MICU2	-5.92	8	-1.49	0.0686	1248	0.981	0.931	16682	1
CCDC19	-5.92	8	-1.49	0.0686	1249	0.981	0.931	16681	1
H2AFV	-5.92	8	-1.49	0.0687	1250	0.981	0.931	16680	1
BZRAP1	-5.92	8	-1.48	0.0688	1251	0.981	0.931	16679	1
FAM185A	-5.92	8	-1.48	0.0688	1252	0.981	0.931	16678	1
PDE8A	-5.92	8	-1.48	0.0688	1253	0.981	0.931	16677	1
RASAL1	-5.91	8	-1.48	0.0688	1254	0.981	0.931	16676	1
SLC38A7	-5.91	8	-1.48	0.0689	1255	0.981	0.931	16675	1
OR4D5	-5.91	8	-1.48	0.0689	1256	0.981	0.931	16674	1
ZYG11B	-5.91	8	-1.48	0.0689	1257	0.981	0.931	16673	1
PDIA6	-5.91	8	-1.48	0.0689	1258	0.981	0.931	16672	1
ZBTB17	-5.91	8	-1.48	0.069	1259	0.981	0.931	16671	1
FAM129B	-5.91	8	-1.48	0.069	1260	0.981	0.931	16670	1
S100P	-5.91	8	-1.48	0.0691	1261	0.982	0.931	16669	1
CAPN10	-5.91	8	-1.48	0.0692	1262	0.982	0.931	16668	1
ANKRD13C	-5.9	8	-1.48	0.0692	1263	0.982	0.931	16667	1
SMARCA1	-5.9	8	-1.48	0.0693	1264	0.983	0.931	16666	1
GPX3	-5.9	8	-1.48	0.0694	1265	0.983	0.931	16665	1
UCKL1	-5.89	8	-1.48	0.0696	1266	0.984	0.93	16664	1
DLG4	-5.51	7	-1.48	0.0697	1267	0.984	0.93	16663	1
GIP	-5.89	8	-1.48	0.0699	1268	0.984	0.93	16662	1
MORF4L1	-5.89	8	-1.48	0.0699	1269	0.984	0.93	16661	1
ZNRF4	-5.89	8	-1.48	0.0699	1270	0.984	0.93	16660	1
ITGAV	-5.88	8	-1.48	0.07	1271	0.984	0.93	16659	1
ZFAND6	-5.88	8	-1.48	0.0701	1272	0.984	0.93	16658	1
RPAP3	-5.88	8	-1.48	0.0701	1273	0.984	0.93	16657	1
APBB1	-5.88	8	-1.47	0.0701	1274	0.984	0.93	16656	1
RALGPS2	-5.09	6	-1.47	0.0702	1275	0.984	0.93	16655	1
ASS1	-5.87	8	-1.47	0.0704	1276	0.984	0.93	16654	1
FAM131C	-5.87	8	-1.47	0.0704	1277	0.984	0.93	16653	1
NPTX1	-5.87	8	-1.47	0.0705	1278	0.984	0.929	16652	1
ARL5C	-5.87	8	-1.47	0.0706	1279	0.984	0.929	16651	1
GPR45	-5.87	8	-1.47	0.0706	1280	0.984	0.929	16650	1
PITPNM3	-5.86	8	-1.47	0.0708	1281	0.984	0.929	16649	1
INPP5E	-5.86	8	-1.47	0.0708	1282	0.984	0.929	16648	1
PGC	-5.86	8	-1.47	0.0708	1283	0.984	0.929	16647	1
GTF2A1	-5.86	8	-1.47	0.0708	1284	0.984	0.929	16646	1
STAB1	-5.86	8	-1.47	0.0709	1285	0.984	0.929	16645	1
PARM1	-5.86	8	-1.47	0.0709	1286	0.984	0.929	16644	1
ORM2	-5.86	8	-1.47	0.071	1287	0.984	0.929	16643	1
MMP21	-5.86	8	-1.47	0.071	1288	0.984	0.929	16642	1
ARPC1A	-5.85	8	-1.47	0.071	1289	0.984	0.929	16641	1
PPT1	-5.85	8	-1.47	0.0711	1290	0.984	0.929	16640	1
KIF5C	-5.85	8	-1.47	0.0712	1291	0.984	0.929	16639	1
SEC14L2	-5.85	8	-1.47	0.0712	1292	0.984	0.929	16638	1
CUL3	-5.85	8	-1.47	0.0712	1293	0.984	0.929	16637	1
CETN2	-5.85	8	-1.47	0.0712	1294	0.984	0.929	16636	1
TMEM176A	-5.85	8	-1.47	0.0713	1295	0.984	0.929	16635	1
PRRC2B	-5.85	8	-1.47	0.0713	1296	0.984	0.929	16634	1
MAP2	-5.84	8	-1.47	0.0714	1297	0.984	0.929	16633	1
CLEC2A	-5.84	8	-1.46	0.0715	1298	0.984	0.929	16632	1
BST1	-5.84	8	-1.46	0.0715	1299	0.984	0.928	16631	1
IRF5	-5.84	8	-1.46	0.0716	1300	0.984	0.928	16630	1
BANF1	-5.06	6	-1.46	0.0716	1301	0.984	0.928	16629	1
OR4F6	-5.84	8	-1.46	0.0717	1302	0.984	0.928	16628	1
ENSA	-5.83	8	-1.46	0.0717	1303	0.984	0.928	16627	1
CD8A	-5.83	8	-1.46	0.0719	1304	0.984	0.928	16626	1
MSL1	-5.83	8	-1.46	0.072	1305	0.984	0.928	16625	1
ZNRF1	-5.45	7	-1.46	0.072	1306	0.984	0.928	16624	1
NLRP1	-5.83	8	-1.46	0.0721	1307	0.984	0.928	16623	1
PLEKHD1	-5.83	8	-1.46	0.0721	1308	0.984	0.928	16622	1
CYB5A	-5.82	8	-1.46	0.0721	1309	0.984	0.928	16621	1
TACC3	-5.82	8	-1.46	0.0722	1310	0.984	0.928	16620	1
C15orf27	-5.82	8	-1.46	0.0722	1311	0.984	0.928	16619	1
RASIP1	-5.82	8	-1.46	0.0723	1312	0.984	0.928	16618	1
MYO10	-5.82	8	-1.46	0.0723	1313	0.984	0.928	16617	1
DUSP19	-5.04	6	-1.46	0.0723	1314	0.984	0.928	16616	1
CD48	-5.82	8	-1.46	0.0724	1315	0.984	0.928	16615	1
IRF7	-5.82	8	-1.46	0.0724	1316	0.984	0.928	16614	1
XYLB	-5.82	8	-1.46	0.0724	1317	0.984	0.928	16613	1
CSTF1	-5.82	8	-1.46	0.0724	1318	0.984	0.928	16612	1
TNRC6A	-5.82	8	-1.46	0.0724	1319	0.984	0.928	16611	1
PAEP	-5.81	8	-1.46	0.0726	1320	0.984	0.927	16610	1
PRMT7	-5.81	8	-1.46	0.0726	1321	0.984	0.927	16609	1
AVPR2	-5.81	8	-1.46	0.0727	1322	0.984	0.927	16608	1
WWTR1	-5.81	8	-1.46	0.0727	1323	0.984	0.927	16607	1
CYP26B1	-5.81	8	-1.46	0.0728	1324	0.984	0.927	16606	1
LRGUK	-5.81	8	-1.46	0.0728	1325	0.984	0.927	16605	1
NCCRP1	-5.03	6	-1.46	0.0728	1326	0.984	0.927	16604	1
RORB	-5.8	8	-1.45	0.0729	1327	0.985	0.927	16603	1
C5orf47	-5.8	8	-1.45	0.0729	1328	0.985	0.927	16602	1
DHRS9	-5.8	8	-1.45	0.073	1329	0.985	0.927	16601	1
CRISP3	-5.8	8	-1.45	0.0731	1330	0.985	0.927	16600	1
DLK2	-5.8	8	-1.45	0.0732	1331	0.986	0.927	16599	1
MICU1	-5.79	8	-1.45	0.0733	1332	0.987	0.927	16598	1
SUPT3H	-5.79	8	-1.45	0.0735	1333	0.988	0.926	16597	1
PGM1	-5.79	8	-1.45	0.0735	1334	0.988	0.926	16596	1
OR13C9	-5.79	8	-1.45	0.0736	1335	0.988	0.926	16595	1
SPSB2	-5.78	8	-1.45	0.0737	1336	0.988	0.926	16594	1
PEAK1	-5.78	8	-1.45	0.0737	1337	0.988	0.926	16593	1
SCARF1	-5.78	8	-1.45	0.0738	1338	0.988	0.926	16592	1
OAT	-5.78	8	-1.45	0.074	1339	0.988	0.926	16591	1
GUCA1A	-5.78	8	-1.45	0.074	1340	0.988	0.926	16590	1
CRNN	-5.78	8	-1.45	0.074	1341	0.988	0.926	16589	1
PLAGL2	-5.77	8	-1.45	0.0741	1342	0.988	0.926	16588	1
MYEOV	-5.77	8	-1.44	0.0743	1343	0.988	0.926	16587	1
C8orf58	-5.77	8	-1.44	0.0743	1344	0.988	0.926	16586	1
DCUN1D2	-5.77	8	-1.44	0.0743	1345	0.988	0.926	16585	1
TMEM67	-5.76	8	-1.44	0.0744	1346	0.988	0.926	16584	1
DTNBP1	-5.76	8	-1.44	0.0744	1347	0.988	0.926	16583	1
KCNK4	-5.76	8	-1.44	0.0745	1348	0.988	0.925	16582	1
DNHD1	-5.76	8	-1.44	0.0745	1349	0.988	0.925	16581	1
TRAPPC12	-5.76	8	-1.44	0.0746	1350	0.988	0.925	16580	1
NOL12	-5.76	8	-1.44	0.0746	1351	0.988	0.925	16579	1
PAK2	-5.76	8	-1.44	0.0747	1352	0.988	0.925	16578	1
HIST1H2BD	-2.88	2	-1.44	0.0747	1353	0.988	0.925	16577	1
PPP4R1	-5.75	8	-1.44	0.0748	1354	0.988	0.925	16576	1
TEX33	-5.75	8	-1.44	0.0748	1355	0.988	0.925	16575	1
STAT1	-5.75	8	-1.44	0.0748	1356	0.988	0.925	16574	1
NBEAL2	-5.75	8	-1.44	0.0748	1357	0.988	0.925	16573	1
ARC	-5.75	8	-1.44	0.0748	1358	0.988	0.925	16572	1
COA1	-4.98	6	-1.44	0.075	1359	0.988	0.925	16571	1
PTPRCAP	-5.75	8	-1.44	0.075	1360	0.988	0.925	16570	1
STARD13	-5.75	8	-1.44	0.075	1361	0.988	0.925	16569	1
INO80E	-5.75	8	-1.44	0.075	1362	0.988	0.925	16568	1
GADD45B	-5.74	8	-1.44	0.0752	1363	0.988	0.925	16567	1
TAS2R42	-5.74	8	-1.44	0.0752	1364	0.988	0.925	16566	1
CC2D1B	-5.74	8	-1.44	0.0753	1365	0.988	0.925	16565	1
DMD	-5.74	8	-1.44	0.0753	1366	0.988	0.925	16564	1
RASEF	-5.74	8	-1.44	0.0755	1367	0.988	0.924	16563	1
HSD17B14	-5.74	8	-1.44	0.0755	1368	0.988	0.924	16562	1
USH2A	-5.74	8	-1.44	0.0755	1369	0.988	0.924	16561	1
SLAMF1	-5.73	8	-1.44	0.0756	1370	0.988	0.924	16560	1
CHST3	-5.73	8	-1.44	0.0756	1371	0.988	0.924	16559	1
USP18	-5.73	8	-1.44	0.0756	1372	0.988	0.924	16558	1
ARHGAP1	-5.73	8	-1.43	0.0757	1373	0.988	0.924	16557	1
TEF	-5.73	8	-1.43	0.0758	1374	0.989	0.924	16556	1
ZNF532	-5.72	8	-1.43	0.0759	1375	0.989	0.924	16555	1
APOF	-5.72	8	-1.43	0.076	1376	0.989	0.924	16554	1
ASPN	-5.72	8	-1.43	0.076	1377	0.989	0.924	16553	1
USP40	-5.72	8	-1.43	0.0761	1378	0.989	0.924	16552	1
HAMP	-5.72	8	-1.43	0.0761	1379	0.989	0.924	16551	1
FKBP3	-5.72	8	-1.43	0.0762	1380	0.989	0.924	16550	1
SPDYA	-5.72	8	-1.43	0.0763	1381	0.989	0.924	16549	1
TCF3	-5.72	8	-1.43	0.0763	1382	0.989	0.924	16548	1
HOMER2	-5.72	8	-1.43	0.0763	1383	0.989	0.924	16547	1
ZNF365	-5.71	8	-1.43	0.0764	1384	0.989	0.924	16546	1
NARF	-5.71	8	-1.43	0.0764	1385	0.989	0.924	16545	1
BECN1	-5.71	8	-1.43	0.0765	1386	0.989	0.924	16544	1
MIPOL1	-5.71	8	-1.43	0.0766	1387	0.989	0.923	16543	1
LRRC47	-5.71	8	-1.43	0.0766	1388	0.989	0.923	16542	1
PRSS38	-5.71	8	-1.43	0.0767	1389	0.989	0.923	16541	1
PRR15	-5.7	8	-1.43	0.0767	1390	0.989	0.923	16540	1
SPG21	-5.7	8	-1.43	0.0768	1391	0.989	0.923	16539	1
C17orf107	-5.7	8	-1.43	0.0768	1392	0.989	0.923	16538	1
B3GALNT2	-5.7	8	-1.43	0.0768	1393	0.989	0.923	16537	1
AQP2	-5.7	8	-1.43	0.077	1394	0.989	0.923	16536	1
PWP1	-5.7	8	-1.43	0.077	1395	0.989	0.923	16535	1
MXD1	-5.7	8	-1.43	0.077	1396	0.989	0.923	16534	1
TRH	-5.69	8	-1.42	0.0771	1397	0.99	0.923	16533	1
SEMA6B	-5.69	8	-1.42	0.0772	1398	0.991	0.923	16532	1
FAM101A	-5.69	8	-1.42	0.0775	1399	0.991	0.923	16531	1
MFSD11	-5.69	8	-1.42	0.0775	1400	0.991	0.923	16530	1
GFI1	-5.68	8	-1.42	0.0775	1401	0.991	0.922	16529	1
DRGX	-5.68	8	-1.42	0.0776	1402	0.991	0.922	16528	1
TMEM140	-5.68	8	-1.42	0.0778	1403	0.991	0.922	16527	1
AMPD2	-5.68	8	-1.42	0.0779	1404	0.991	0.922	16526	1
MAP3K1	-5.67	8	-1.42	0.0779	1405	0.991	0.922	16525	1
RBM46	-5.67	8	-1.42	0.0779	1406	0.991	0.922	16524	1
PALMD	-5.67	8	-1.42	0.0779	1407	0.991	0.922	16523	1
PSMC1	-5.67	8	-1.42	0.078	1408	0.991	0.922	16522	1
ZNF518B	-5.67	8	-1.42	0.078	1409	0.991	0.922	16521	1
SLC16A3	-5.67	8	-1.42	0.078	1410	0.991	0.922	16520	1
AP2A1	-5.67	8	-1.42	0.0781	1411	0.991	0.922	16519	1
QSOX1	-5.67	8	-1.42	0.0781	1412	0.991	0.922	16518	1
SPECC1L	-5.67	8	-1.42	0.0781	1413	0.991	0.922	16517	1
PAF1	-5.67	8	-1.42	0.0782	1414	0.991	0.922	16516	1
ACTL8	-4.91	6	-1.42	0.0782	1415	0.991	0.922	16515	1
CACNG1	-5.66	8	-1.42	0.0784	1416	0.992	0.922	16514	1
AKAP13	-5.66	8	-1.41	0.0786	1417	0.992	0.921	16513	1
POLR1A	-5.66	8	-1.41	0.0786	1418	0.992	0.921	16512	1
ZNF644	-5.66	8	-1.41	0.0786	1419	0.992	0.921	16511	1
TMPRSS11D	-5.65	8	-1.41	0.0787	1420	0.992	0.921	16510	1
ALK	-5.65	8	-1.41	0.0788	1421	0.992	0.921	16509	1
PLCG1	-5.65	8	-1.41	0.0788	1422	0.992	0.921	16508	1
KCNK1	-5.65	8	-1.41	0.0788	1423	0.992	0.921	16507	1
2021-09-12	-5.65	8	-1.41	0.0788	1424	0.992	0.921	16506	1
PTPN13	-5.65	8	-1.41	0.0788	1425	0.992	0.921	16505	1
OR10R2	-5.65	8	-1.41	0.0789	1426	0.992	0.921	16504	1
TYRP1	-5.65	8	-1.41	0.079	1427	0.992	0.921	16503	1
MEX3A	-5.64	8	-1.41	0.0792	1428	0.992	0.921	16502	1
PGBD1	-5.64	8	-1.41	0.0793	1429	0.992	0.921	16501	1
H3F3B	-3.99	4	-1.41	0.0793	1430	0.992	0.921	16500	1
CEP72	-5.64	8	-1.41	0.0793	1431	0.992	0.921	16499	1
SOX1	-5.63	8	-1.41	0.0795	1432	0.992	0.92	16498	1
PXMP2	-5.63	8	-1.41	0.0797	1433	0.992	0.92	16497	1
SF3B3	-5.26	7	-1.41	0.0798	1434	0.992	0.92	16496	1
C17orf59	-5.63	8	-1.41	0.0798	1435	0.992	0.92	16495	1
C20orf195	-5.63	8	-1.41	0.0798	1436	0.992	0.92	16494	1
CBX2	-5.63	8	-1.41	0.0798	1437	0.992	0.92	16493	1
CDH16	-5.63	8	-1.41	0.0798	1438	0.992	0.92	16492	1
CDC42EP4	-5.62	8	-1.41	0.0799	1439	0.992	0.92	16491	1
BICC1	-5.62	8	-1.41	0.0799	1440	0.992	0.92	16490	1
IQCC	-5.62	8	-1.41	0.08	1441	0.992	0.92	16489	1
GGACT	-5.62	8	-1.41	0.08	1442	0.992	0.92	16488	1
ANP32B	-5.62	8	-1.41	0.08	1443	0.992	0.92	16487	1
PSMC3IP	-5.62	8	-1.4	0.0801	1444	0.992	0.92	16486	1
SLC36A1	-5.62	8	-1.4	0.0803	1445	0.992	0.92	16485	1
MIB2	-5.62	8	-1.4	0.0803	1446	0.992	0.92	16484	1
LMBRD2	-5.61	8	-1.4	0.0803	1447	0.992	0.92	16483	1
ARMCX2	-5.61	8	-1.4	0.0804	1448	0.992	0.92	16482	1
ZSCAN5A	-5.61	8	-1.4	0.0804	1449	0.992	0.92	16481	1
COA3	-5.61	8	-1.4	0.0804	1450	0.992	0.92	16480	1
CKMT2	-5.61	8	-1.4	0.0805	1451	0.992	0.92	16479	1
TNFRSF25	-5.61	8	-1.4	0.0805	1452	0.992	0.919	16478	1
TXN2	-5.61	8	-1.4	0.0805	1453	0.992	0.919	16477	1
C3orf33	-3.96	4	-1.4	0.0808	1454	0.992	0.919	16476	1
HSD17B4	-5.6	8	-1.4	0.0808	1455	0.992	0.919	16475	1
LONRF1	-5.6	8	-1.4	0.0808	1456	0.992	0.919	16474	1
FAM3C	-5.6	8	-1.4	0.0809	1457	0.992	0.919	16473	1
DMRTA2	-5.6	8	-1.4	0.0809	1458	0.992	0.919	16472	1
PAOX	-5.6	8	-1.4	0.081	1459	0.992	0.919	16471	1
CHKA	-5.6	8	-1.4	0.081	1460	0.992	0.919	16470	1
BUD13	-5.6	8	-1.4	0.0811	1461	0.992	0.919	16469	1
TTC14	-5.6	8	-1.4	0.0811	1462	0.992	0.919	16468	1
RIMS3	-5.59	8	-1.4	0.0812	1463	0.992	0.919	16467	1
OCA2	-5.59	8	-1.4	0.0813	1464	0.992	0.919	16466	1
USP13	-5.59	8	-1.4	0.0813	1465	0.992	0.919	16465	1
RASGRF1	-5.59	8	-1.4	0.0813	1466	0.992	0.919	16464	1
BLOC1S1	-5.59	8	-1.4	0.0814	1467	0.992	0.919	16463	1
TUBGCP3	-5.59	8	-1.4	0.0814	1468	0.992	0.919	16462	1
MYCN	-5.59	8	-1.4	0.0815	1469	0.992	0.919	16461	1
NAA15	-5.59	8	-1.4	0.0815	1470	0.992	0.919	16460	1
ANKRD13D	-5.59	8	-1.4	0.0815	1471	0.992	0.919	16459	1
CLN6	-5.59	8	-1.39	0.0815	1472	0.992	0.918	16458	1
PGP	-5.58	8	-1.39	0.0816	1473	0.992	0.918	16457	1
CA9	-5.58	8	-1.39	0.0816	1474	0.992	0.918	16456	1
NAPG	-5.58	8	-1.39	0.0818	1475	0.992	0.918	16455	1
CNTN1	-5.58	8	-1.39	0.0818	1476	0.992	0.918	16454	1
MED18	-5.58	8	-1.39	0.0818	1477	0.992	0.918	16453	1
SCPEP1	-5.58	8	-1.39	0.0819	1478	0.992	0.918	16452	1
GDF11	-5.57	8	-1.39	0.082	1479	0.992	0.918	16451	1
AVPR1A	-5.57	8	-1.39	0.082	1480	0.992	0.918	16450	1
TMEM109	-5.57	8	-1.39	0.0821	1481	0.992	0.918	16449	1
CMTM2	-5.57	8	-1.39	0.0821	1482	0.992	0.918	16448	1
NDUFA12	-5.57	8	-1.39	0.0822	1483	0.992	0.918	16447	1
SPDYE4	-5.57	8	-1.39	0.0823	1484	0.992	0.918	16446	1
MMP11	-5.56	8	-1.39	0.0824	1485	0.992	0.918	16445	1
CCL5	-5.56	8	-1.39	0.0824	1486	0.992	0.918	16444	1
RLIM	-5.56	8	-1.39	0.0825	1487	0.992	0.918	16443	1
EPHA8	-5.56	8	-1.39	0.0825	1488	0.992	0.917	16442	1
ACBD3	-5.56	8	-1.39	0.0826	1489	0.992	0.917	16441	1
ADRA2A	-5.56	8	-1.39	0.0827	1490	0.992	0.917	16440	1
SEC24B	-5.56	8	-1.39	0.0827	1491	0.992	0.917	16439	1
NUP98	-5.56	8	-1.39	0.0827	1492	0.992	0.917	16438	1
PPP1R27	-5.56	8	-1.39	0.0827	1493	0.992	0.917	16437	1
P2RX1	-5.56	8	-1.39	0.0827	1494	0.992	0.917	16436	1
TNN	-5.55	8	-1.39	0.0828	1495	0.992	0.917	16435	1
PLEKHB1	-5.55	8	-1.39	0.0828	1496	0.992	0.917	16434	1
AQR	-5.55	8	-1.39	0.0828	1497	0.992	0.917	16433	1
PCDHA4	-5.55	8	-1.39	0.0829	1498	0.992	0.917	16432	1
VWF	-5.55	8	-1.39	0.083	1499	0.992	0.917	16431	1
NOP10	-5.55	8	-1.38	0.083	1500	0.992	0.917	16430	1
VWA3A	-5.55	8	-1.38	0.0831	1501	0.992	0.917	16429	1
LCE3B	-5.55	8	-1.38	0.0831	1502	0.992	0.917	16428	1
ACP2	-5.55	8	-1.38	0.0831	1503	0.992	0.917	16427	1
AGTRAP	-5.54	8	-1.38	0.0833	1504	0.992	0.917	16426	1
PPRC1	-5.54	8	-1.38	0.0835	1505	0.992	0.917	16425	1
CASR	-5.54	8	-1.38	0.0835	1506	0.992	0.916	16424	1
GNRH2	-5.53	8	-1.38	0.0836	1507	0.992	0.916	16423	1
ATP12A	-5.53	8	-1.38	0.0838	1508	0.992	0.916	16422	1
PDCD1LG2	-5.53	8	-1.38	0.0838	1509	0.992	0.916	16421	1
KIF2B	-4.79	6	-1.38	0.0838	1510	0.992	0.916	16420	1
UBE2C	-5.53	8	-1.38	0.0838	1511	0.992	0.916	16419	1
TAS2R3	-5.53	8	-1.38	0.0838	1512	0.992	0.916	16418	1
DPM1	-5.53	8	-1.38	0.0838	1513	0.992	0.916	16417	1
MCOLN2	-5.53	8	-1.38	0.0839	1514	0.992	0.916	16416	1
JPH3	-5.53	8	-1.38	0.084	1515	0.992	0.916	16415	1
ANXA3	-5.53	8	-1.38	0.084	1516	0.992	0.916	16414	1
ZNF256	-5.53	8	-1.38	0.084	1517	0.992	0.916	16413	1
CXorf36	-5.52	8	-1.38	0.0842	1518	0.992	0.916	16412	1
CHRNA6	-5.52	8	-1.38	0.0842	1519	0.992	0.916	16411	1
ERCC5	-5.52	8	-1.38	0.0842	1520	0.992	0.916	16410	1
PTGS2	-5.52	8	-1.38	0.0843	1521	0.992	0.916	16409	1
ROR2	-5.52	8	-1.38	0.0844	1522	0.992	0.916	16408	1
CHMP3	-2.76	2	-1.38	0.0844	1523	0.992	0.916	16407	1
NFYA	-5.51	8	-1.38	0.0846	1524	0.992	0.915	16406	1
NAGS	-5.51	8	-1.37	0.0846	1525	0.992	0.915	16405	1
UBE2B	-5.51	8	-1.37	0.0846	1526	0.992	0.915	16404	1
SEC23B	-5.51	8	-1.37	0.0847	1527	0.992	0.915	16403	1
LRP5	-5.51	8	-1.37	0.0848	1528	0.992	0.915	16402	1
CCDC105	-5.51	8	-1.37	0.0848	1529	0.992	0.915	16401	1
NRN1L	-5.51	8	-1.37	0.0848	1530	0.992	0.915	16400	1
STAP1	-5.51	8	-1.37	0.0848	1531	0.992	0.915	16399	1
ZNF284	-5.5	8	-1.37	0.0849	1532	0.992	0.915	16398	1
CORO6	-5.5	8	-1.37	0.0849	1533	0.992	0.915	16397	1
BEND4	-5.5	8	-1.37	0.085	1534	0.992	0.915	16396	1
SDHD	-5.5	8	-1.37	0.085	1535	0.992	0.915	16395	1
MBOAT1	-5.5	8	-1.37	0.0851	1536	0.992	0.915	16394	1
LCNL1	-5.5	8	-1.37	0.0851	1537	0.992	0.915	16393	1
CHPF2	-5.5	8	-1.37	0.0852	1538	0.992	0.915	16392	1
CHADL	-5.5	8	-1.37	0.0852	1539	0.992	0.915	16391	1
OCEL1	-5.49	8	-1.37	0.0855	1540	0.992	0.914	16390	1
TIMM50	-5.49	8	-1.37	0.0856	1541	0.992	0.914	16389	1
MYLPF	-5.49	8	-1.37	0.0856	1542	0.992	0.914	16388	1
SRCIN1	-5.48	8	-1.37	0.0859	1543	0.992	0.914	16387	1
PHYHIP	-5.48	8	-1.37	0.0859	1544	0.992	0.914	16386	1
KLLN	-5.48	8	-1.37	0.0861	1545	0.992	0.914	16385	1
VIL1	-5.48	8	-1.37	0.0861	1546	0.992	0.914	16384	1
SMURF2	-5.48	8	-1.37	0.0861	1547	0.992	0.914	16383	1
GXYLT2	-5.48	8	-1.37	0.0861	1548	0.992	0.914	16382	1
ZSWIM3	-5.47	8	-1.36	0.0861	1549	0.992	0.914	16381	1
PAXIP1	-5.47	8	-1.36	0.0861	1550	0.992	0.914	16380	1
YME1L1	-5.47	8	-1.36	0.0862	1551	0.992	0.914	16379	1
KIF18A	-5.12	7	-1.36	0.0863	1552	0.992	0.914	16378	1
RIMS4	-5.47	8	-1.36	0.0863	1553	0.992	0.914	16377	1
ERCC6	-5.47	8	-1.36	0.0863	1554	0.992	0.914	16376	1
RBM42	-5.47	8	-1.36	0.0864	1555	0.992	0.914	16375	1
USP10	-5.47	8	-1.36	0.0864	1556	0.992	0.914	16374	1
SLC16A10	-5.47	8	-1.36	0.0865	1557	0.992	0.914	16373	1
UBR7	-5.47	8	-1.36	0.0865	1558	0.992	0.913	16372	1
OSCP1	-5.46	8	-1.36	0.0866	1559	0.992	0.913	16371	1
TPD52	-5.46	8	-1.36	0.0867	1560	0.992	0.913	16370	1
SLC14A1	-5.46	8	-1.36	0.0867	1561	0.992	0.913	16369	1
CHIC1	-5.46	8	-1.36	0.0867	1562	0.992	0.913	16368	1
SPEM1	-5.46	8	-1.36	0.0867	1563	0.992	0.913	16367	1
GPR88	-5.46	8	-1.36	0.0868	1564	0.992	0.913	16366	1
UMPS	-5.45	8	-1.36	0.087	1565	0.992	0.913	16365	1
2021-03-03	-5.45	8	-1.36	0.0871	1566	0.992	0.913	16364	1
FBXW2	-5.45	8	-1.36	0.0871	1567	0.992	0.913	16363	1
AES	-5.45	8	-1.36	0.0872	1568	0.992	0.913	16362	1
DNAJC6	-5.45	8	-1.36	0.0874	1569	0.992	0.913	16361	1
KHSRP	-5.45	8	-1.36	0.0874	1570	0.992	0.913	16360	1
ABHD11	-5.44	8	-1.36	0.0874	1571	0.992	0.913	16359	1
FNDC4	-5.44	8	-1.36	0.0876	1572	0.992	0.912	16358	1
ADAM15	-5.44	8	-1.36	0.0877	1573	0.992	0.912	16357	1
DCXR	-5.44	8	-1.35	0.0877	1574	0.992	0.912	16356	1
PANX1	-5.44	8	-1.35	0.0878	1575	0.992	0.912	16355	1
PGPEP1L	-5.44	8	-1.35	0.0878	1576	0.992	0.912	16354	1
FAM81B	-5.43	8	-1.35	0.0879	1577	0.992	0.912	16353	1
ABCC8	-5.43	8	-1.35	0.0879	1578	0.992	0.912	16352	1
RXFP2	-5.43	8	-1.35	0.0879	1579	0.992	0.912	16351	1
FAM83E	-5.43	8	-1.35	0.088	1580	0.992	0.912	16350	1
FLJ27365	-5.43	8	-1.35	0.088	1581	0.992	0.912	16349	1
TNFRSF11A	-5.43	8	-1.35	0.0881	1582	0.992	0.912	16348	1
GPR148	-5.43	8	-1.35	0.0883	1583	0.992	0.912	16347	1
KCNIP3	-5.42	8	-1.35	0.0883	1584	0.992	0.912	16346	1
STK11	-5.42	8	-1.35	0.0884	1585	0.992	0.912	16345	1
C9orf135	-5.42	8	-1.35	0.0887	1586	0.992	0.911	16344	1
N6AMT2	-5.41	8	-1.35	0.0888	1587	0.992	0.911	16343	1
TPPP2	-5.41	8	-1.35	0.0888	1588	0.992	0.911	16342	1
PAQR8	-5.41	8	-1.35	0.0889	1589	0.992	0.911	16341	1
GNLY	-5.41	8	-1.35	0.089	1590	0.992	0.911	16340	1
PPFIBP2	-5.41	8	-1.35	0.089	1591	0.992	0.911	16339	1
HS3ST1	-5.41	8	-1.35	0.0892	1592	0.992	0.911	16338	1
RFPL3S	-5.4	8	-1.35	0.0892	1593	0.992	0.911	16337	1
SOS2	-5.4	8	-1.35	0.0892	1594	0.992	0.911	16336	1
GJA8	-5.4	8	-1.35	0.0892	1595	0.992	0.911	16335	1
NARFL	-5.4	8	-1.35	0.0892	1596	0.992	0.911	16334	1
KCNU1	-5.4	8	-1.34	0.0894	1597	0.992	0.911	16333	1
SLC20A1	-5.4	8	-1.34	0.0894	1598	0.992	0.911	16332	1
SLC35D2	-5.4	8	-1.34	0.0894	1599	0.992	0.911	16331	1
NRN1	-5.4	8	-1.34	0.0894	1600	0.992	0.911	16330	1
PRMT3	-5.4	8	-1.34	0.0894	1601	0.992	0.911	16329	1
NAA50	-5.4	8	-1.34	0.0895	1602	0.992	0.91	16328	1
ABCG2	-5.4	8	-1.34	0.0895	1603	0.992	0.91	16327	1
RRP15	-5.4	8	-1.34	0.0895	1604	0.992	0.91	16326	1
SFT2D1	-5.39	8	-1.34	0.0896	1605	0.992	0.91	16325	1
PPA2	-5.39	8	-1.34	0.0896	1606	0.992	0.91	16324	1
SPINT1	-5.39	8	-1.34	0.0896	1607	0.992	0.91	16323	1
ELTD1	-5.39	8	-1.34	0.0897	1608	0.992	0.91	16322	1
CAMKMT	-5.39	8	-1.34	0.0897	1609	0.992	0.91	16321	1
WHSC1	-5.39	8	-1.34	0.0897	1610	0.992	0.91	16320	1
TRIAP1	-5.39	8	-1.34	0.0897	1611	0.992	0.91	16319	1
SURF1	-5.39	8	-1.34	0.0898	1612	0.992	0.91	16318	1
AC009892.10	-2.69	2	-1.34	0.0899	1613	0.992	0.91	16317	1
ZNF691	-5.39	8	-1.34	0.0899	1614	0.992	0.91	16316	1
ACPP	-5.38	8	-1.34	0.0901	1615	0.992	0.91	16315	1
GORAB	-5.38	8	-1.34	0.0901	1616	0.992	0.91	16314	1
PTPRS	-5.38	8	-1.34	0.0901	1617	0.992	0.91	16313	1
DNAH7	-5.38	8	-1.34	0.0902	1618	0.992	0.91	16312	1
RNF19A	-5.38	8	-1.34	0.0902	1619	0.992	0.91	16311	1
ONECUT3	-5.38	8	-1.34	0.0902	1620	0.992	0.91	16310	1
REG1B	-5.38	8	-1.34	0.0902	1621	0.992	0.91	16309	1
MMP28	-5.38	8	-1.34	0.0903	1622	0.992	0.91	16308	1
WNT8B	-5.38	8	-1.34	0.0904	1623	0.992	0.91	16307	1
NRF1	-5.38	8	-1.34	0.0904	1624	0.992	0.91	16306	1
SLC22A31	-5.03	7	-1.34	0.0905	1625	0.992	0.91	16305	1
PRAC1	-4.65	6	-1.34	0.0905	1626	0.992	0.91	16304	1
CECR1	-5.37	8	-1.34	0.0906	1627	0.992	0.909	16303	1
C12orf5	-5.37	8	-1.34	0.0907	1628	0.992	0.909	16302	1
PLEKHS1	-5.37	8	-1.34	0.0908	1629	0.992	0.909	16301	1
KLF6	-5.37	8	-1.34	0.0908	1630	0.992	0.909	16300	1
ESYT3	-5.36	8	-1.34	0.0909	1631	0.992	0.909	16299	1
APEX1	-5.36	8	-1.33	0.091	1632	0.992	0.909	16298	1
ANKRD1	-5.36	8	-1.33	0.0911	1633	0.992	0.909	16297	1
ZFP3	-5.36	8	-1.33	0.0911	1634	0.992	0.909	16296	1
ACSL3	-5.36	8	-1.33	0.0911	1635	0.992	0.909	16295	1
BHLHE22	-5.36	8	-1.33	0.0912	1636	0.992	0.909	16294	1
AGR2	-5.36	8	-1.33	0.0913	1637	0.992	0.909	16293	1
SUCLG2	-4.64	6	-1.33	0.0914	1638	0.992	0.909	16292	1
ZHX2	-5.35	8	-1.33	0.0914	1639	0.992	0.909	16291	1
FRMD7	-5.35	8	-1.33	0.0915	1640	0.992	0.908	16290	1
PP2D1	-4.63	6	-1.33	0.0915	1641	0.992	0.908	16289	1
KAT2A	-5.35	8	-1.33	0.0918	1642	0.992	0.908	16288	1
MYC	-5.35	8	-1.33	0.0918	1643	0.992	0.908	16287	1
ATG10	-5.34	8	-1.33	0.0919	1644	0.992	0.908	16286	1
RSPO1	-5.34	8	-1.33	0.092	1645	0.992	0.908	16285	1
PCDHGA6	-5.34	8	-1.33	0.092	1646	0.992	0.908	16284	1
ACTL7B	-5.34	8	-1.33	0.0921	1647	0.992	0.908	16283	1
LAT2	-5.34	8	-1.33	0.0921	1648	0.992	0.908	16282	1
TFEB	-5.34	8	-1.33	0.0922	1649	0.992	0.908	16281	1
NPBWR2	-5.34	8	-1.33	0.0922	1650	0.992	0.908	16280	1
TNFRSF17	-5.34	8	-1.33	0.0922	1651	0.992	0.908	16279	1
FDPS	-5.34	8	-1.33	0.0922	1652	0.992	0.908	16278	1
ACAA1	-5.33	8	-1.33	0.0923	1653	0.992	0.908	16277	1
ECSIT	-5.33	8	-1.33	0.0923	1654	0.992	0.908	16276	1
AC091801.1	-4.62	6	-1.33	0.0923	1655	0.992	0.908	16275	1
KCNJ14	-5.33	8	-1.33	0.0924	1656	0.992	0.908	16274	1
KLC1	-5.33	8	-1.33	0.0924	1657	0.992	0.908	16273	1
SEC13	-5.33	8	-1.33	0.0925	1658	0.992	0.907	16272	1
UCN	-5.33	8	-1.33	0.0925	1659	0.992	0.907	16271	1
TBX15	-5.33	8	-1.33	0.0926	1660	0.992	0.907	16270	1
LRP11	-5.33	8	-1.32	0.0927	1661	0.992	0.907	16269	1
HYKK	-5.32	8	-1.32	0.0928	1662	0.992	0.907	16268	1
SLC22A8	-5.32	8	-1.32	0.0931	1663	0.992	0.907	16267	1
FKBP7	-5.32	8	-1.32	0.0931	1664	0.992	0.907	16266	1
BTBD11	-5.31	8	-1.32	0.0932	1665	0.992	0.907	16265	1
PAGE1	-5.31	8	-1.32	0.0934	1666	0.992	0.907	16264	0.999
EIF3H	-5.31	8	-1.32	0.0934	1667	0.992	0.907	16263	0.999
MMP15	-5.31	8	-1.32	0.0935	1668	0.992	0.906	16262	0.999
NRROS	-5.31	8	-1.32	0.0936	1669	0.992	0.906	16261	0.999
CEP112	-5.3	8	-1.32	0.0936	1670	0.992	0.906	16260	0.999
FRRS1	-5.3	8	-1.32	0.0937	1671	0.992	0.906	16259	0.999
SLC26A2	-5.3	8	-1.32	0.0938	1672	0.992	0.906	16258	0.999
PHB2	-4.96	7	-1.32	0.0938	1673	0.992	0.906	16257	0.999
ZNF454	-5.3	8	-1.32	0.0938	1674	0.992	0.906	16256	0.999
SIVA1	-5.3	8	-1.32	0.0939	1675	0.992	0.906	16255	0.999
KLF2	-5.3	8	-1.32	0.0939	1676	0.992	0.906	16254	0.999
EIF3J	-4.96	7	-1.32	0.094	1677	0.992	0.906	16253	0.999
SMLR1	-5.29	8	-1.32	0.0942	1678	0.992	0.906	16252	0.999
MCIDAS	-4.95	7	-1.32	0.0942	1679	0.992	0.906	16251	0.999
SLC25A2	-5.29	8	-1.32	0.0942	1680	0.992	0.906	16250	0.999
ZFYVE28	-5.29	8	-1.31	0.0943	1681	0.992	0.906	16249	0.999
DCTPP1	-5.29	8	-1.31	0.0943	1682	0.992	0.906	16248	0.999
CROCC	-5.29	8	-1.31	0.0943	1683	0.992	0.906	16247	0.999
GPR180	-5.29	8	-1.31	0.0944	1684	0.992	0.906	16246	0.999
CNOT2	-5.29	8	-1.31	0.0944	1685	0.992	0.906	16245	0.999
KIAA0195	-5.29	8	-1.31	0.0944	1686	0.992	0.906	16244	0.999
ZNF23	-5.29	8	-1.31	0.0944	1687	0.992	0.906	16243	0.999
C7orf55	-2.64	2	-1.31	0.0945	1688	0.992	0.906	16242	0.999
NPFFR1	-5.29	8	-1.31	0.0945	1689	0.992	0.906	16241	0.999
DPCD	-5.28	8	-1.31	0.0945	1690	0.992	0.905	16240	0.999
PLAC8	-5.28	8	-1.31	0.0946	1691	0.992	0.905	16239	0.999
SAGE1	-5.28	8	-1.31	0.0947	1692	0.992	0.905	16238	0.999
LPHN1	-5.28	8	-1.31	0.0948	1693	0.992	0.905	16237	0.999
FGF6	-5.28	8	-1.31	0.0948	1694	0.992	0.905	16236	0.999
FXR2	-5.28	8	-1.31	0.0949	1695	0.992	0.905	16235	0.999
TSTD1	-5.27	8	-1.31	0.095	1696	0.992	0.905	16234	0.999
ZBTB12	-5.27	8	-1.31	0.0951	1697	0.992	0.905	16233	0.999
GOLGA1	-5.27	8	-1.31	0.0954	1698	0.992	0.905	16232	0.999
METRNL	-5.27	8	-1.31	0.0954	1699	0.992	0.905	16231	0.999
PHF8	-5.26	8	-1.31	0.0955	1700	0.992	0.904	16230	0.999
MGRN1	-5.26	8	-1.31	0.0955	1701	0.992	0.904	16229	0.999
FAM98C	-5.26	8	-1.31	0.0956	1702	0.992	0.904	16228	0.999
ZNF383	-5.26	8	-1.31	0.0956	1703	0.992	0.904	16227	0.999
RNF165	-5.26	8	-1.31	0.0958	1704	0.992	0.904	16226	0.999
ADH5	-5.26	8	-1.31	0.0958	1705	0.992	0.904	16225	0.999
SOGA1	-5.25	8	-1.3	0.096	1706	0.992	0.904	16224	0.999
SRRM3	-5.25	8	-1.3	0.0961	1707	0.992	0.904	16223	0.999
ATXN7L1	-5.25	8	-1.3	0.0961	1708	0.992	0.904	16222	0.999
FBXO34	-5.25	8	-1.3	0.0962	1709	0.992	0.904	16221	0.999
DHH	-5.25	8	-1.3	0.0962	1710	0.992	0.904	16220	0.999
CSRNP1	-5.25	8	-1.3	0.0962	1711	0.992	0.904	16219	0.999
OR52K2	-5.25	8	-1.3	0.0964	1712	0.992	0.904	16218	0.999
CPEB3	-5.24	8	-1.3	0.0964	1713	0.992	0.904	16217	0.999
C6orf10	-5.24	8	-1.3	0.0965	1714	0.992	0.904	16216	0.999
KLHL15	-5.24	8	-1.3	0.0966	1715	0.992	0.903	16215	0.999
ZNF382	-5.24	8	-1.3	0.0966	1716	0.992	0.903	16214	0.999
DHRS12	-5.24	8	-1.3	0.0966	1717	0.992	0.903	16213	0.999
NACA	-5.24	8	-1.3	0.0967	1718	0.992	0.903	16212	0.999
BTN3A3	-5.24	8	-1.3	0.0967	1719	0.992	0.903	16211	0.999
TXNDC15	-5.24	8	-1.3	0.0967	1720	0.992	0.903	16210	0.999
NFE2L2	-5.24	8	-1.3	0.0968	1721	0.992	0.903	16209	0.999
CD163L1	-5.24	8	-1.3	0.0968	1722	0.992	0.903	16208	0.999
HRK	-5.23	8	-1.3	0.0969	1723	0.992	0.903	16207	0.999
LPCAT3	-4.53	6	-1.3	0.0969	1724	0.992	0.903	16206	0.999
FAM47B	-5.23	8	-1.3	0.0969	1725	0.992	0.903	16205	0.999
VPS37C	-5.23	8	-1.3	0.0969	1726	0.992	0.903	16204	0.999
BRS3	-5.23	8	-1.3	0.0969	1727	0.992	0.903	16203	0.999
RMI1	-5.23	8	-1.3	0.0971	1728	0.992	0.903	16202	0.999
C12orf57	-5.23	8	-1.3	0.0972	1729	0.992	0.903	16201	0.999
AC007431.1	-5.23	8	-1.3	0.0973	1730	0.992	0.903	16200	0.999
YPEL2	-5.23	8	-1.3	0.0973	1731	0.992	0.903	16199	0.999
FAM110A	-5.23	8	-1.3	0.0973	1732	0.992	0.903	16198	0.999
PIK3AP1	-5.22	8	-1.3	0.0975	1733	0.992	0.903	16197	0.999
MSRB1	-5.22	8	-1.3	0.0975	1734	0.992	0.902	16196	0.999
KIF13A	-5.22	8	-1.3	0.0976	1735	0.992	0.902	16195	0.999
CRB2	-5.22	8	-1.3	0.0976	1736	0.992	0.902	16194	0.999
NF2	-5.22	8	-1.3	0.0977	1737	0.992	0.902	16193	0.999
CAP1	-5.22	8	-1.29	0.0977	1738	0.992	0.902	16192	0.999
CDCA2	-5.22	8	-1.29	0.0977	1739	0.992	0.902	16191	0.999
ATP6V0A2	-5.22	8	-1.29	0.0977	1740	0.992	0.902	16190	0.999
HSPG2	-5.22	8	-1.29	0.0978	1741	0.992	0.902	16189	0.999
DUSP26	-5.21	8	-1.29	0.0978	1742	0.992	0.902	16188	0.999
NR2F1	-5.21	8	-1.29	0.0979	1743	0.992	0.902	16187	0.999
CCDC28B	-5.21	8	-1.29	0.098	1744	0.992	0.902	16186	0.999
ZKSCAN1	-5.21	8	-1.29	0.098	1745	0.992	0.902	16185	0.999
ACRV1	-5.21	8	-1.29	0.098	1746	0.992	0.902	16184	0.999
GRAMD3	-5.21	8	-1.29	0.098	1747	0.992	0.902	16183	0.999
PPP1R32	-5.21	8	-1.29	0.0981	1748	0.992	0.902	16182	0.999
ALDH3A1	-5.21	8	-1.29	0.0982	1749	0.992	0.902	16181	0.999
TRPC1	-5.21	8	-1.29	0.0982	1750	0.992	0.902	16180	0.999
RREB1	-5.21	8	-1.29	0.0982	1751	0.992	0.902	16179	0.999
ERAL1	-5.2	8	-1.29	0.0983	1752	0.992	0.902	16178	0.999
SPATS1	-5.2	8	-1.29	0.0984	1753	0.992	0.902	16177	0.999
THBS1	-5.2	8	-1.29	0.0984	1754	0.992	0.902	16176	0.999
C19orf26	-5.2	8	-1.29	0.0984	1755	0.992	0.902	16175	0.999
DIRC2	-5.2	8	-1.29	0.0987	1756	0.992	0.901	16174	0.999
CCNH	-5.19	8	-1.29	0.0988	1757	0.992	0.901	16173	0.999
SS18L2	-5.19	8	-1.29	0.0988	1758	0.992	0.901	16172	0.999
MPHOSPH8	-5.19	8	-1.29	0.0988	1759	0.992	0.901	16171	0.999
ARMC2	-5.19	8	-1.29	0.0988	1760	0.992	0.901	16170	0.999
GNL3L	-5.19	8	-1.29	0.0988	1761	0.992	0.901	16169	0.999
ZFP37	-5.19	8	-1.29	0.0989	1762	0.992	0.901	16168	0.999
SRGAP3	-5.19	8	-1.29	0.0989	1763	0.992	0.901	16167	0.999
TBCB	-5.19	8	-1.29	0.099	1764	0.992	0.901	16166	0.999
C4orf27	-5.19	8	-1.29	0.0991	1765	0.992	0.901	16165	0.999
CMTM7	-5.19	8	-1.29	0.0992	1766	0.992	0.901	16164	0.999
TXNDC2	-5.18	8	-1.28	0.0995	1767	0.992	0.9	16163	0.999
LOXL3	-5.18	8	-1.28	0.0995	1768	0.992	0.9	16162	0.999
RASAL2	-5.18	8	-1.28	0.0995	1769	0.992	0.9	16161	0.999
ENPP6	-5.17	8	-1.28	0.0998	1770	0.992	0.9	16160	0.999
UBASH3A	-5.17	8	-1.28	0.0998	1771	0.992	0.9	16159	0.999
GEM	-5.17	8	-1.28	0.1	1772	0.992	0.9	16158	0.999
SHROOM3	-5.17	8	-1.28	0.1	1773	0.992	0.9	16157	0.999
ZNF672	-5.17	8	-1.28	0.1	1774	0.992	0.9	16156	0.999
FOLR3	-5.17	8	-1.28	0.1	1775	0.992	0.9	16155	0.999
CSPG4	-5.17	8	-1.28	0.1	1776	0.992	0.9	16154	0.999
MCMDC2	-5.16	8	-1.28	0.1	1777	0.992	0.9	16153	0.999
HSP90AB1	-5.16	8	-1.28	0.1	1778	0.992	0.9	16152	0.999
TGM3	-5.16	8	-1.28	0.1	1779	0.992	0.9	16151	0.999
ZFP69B	-5.16	8	-1.28	0.1	1780	0.992	0.9	16150	0.999
AKAP1	-5.16	8	-1.28	0.1	1781	0.992	0.9	16149	0.999
DPCR1	-5.16	8	-1.28	0.101	1782	0.992	0.899	16148	0.999
CHODL	-5.15	8	-1.28	0.101	1783	0.992	0.899	16147	0.998
ALG12	-5.15	8	-1.28	0.101	1784	0.992	0.899	16146	0.998
SKIDA1	-5.15	8	-1.28	0.101	1785	0.992	0.899	16145	0.998
CUL2	-5.15	8	-1.28	0.101	1786	0.992	0.899	16144	0.998
PLCB3	-5.15	8	-1.28	0.101	1787	0.992	0.899	16143	0.998
CADM3	-5.14	8	-1.28	0.101	1788	0.992	0.899	16142	0.998
IL17D	-5.14	8	-1.27	0.101	1789	0.992	0.899	16141	0.998
TMEM202	-5.14	8	-1.27	0.101	1790	0.992	0.899	16140	0.998
DDX39A	-5.14	8	-1.27	0.101	1791	0.992	0.899	16139	0.998
MROH1	-5.14	8	-1.27	0.101	1792	0.992	0.899	16138	0.998
LGR5	-5.14	8	-1.27	0.101	1793	0.992	0.899	16137	0.998
RB1	-5.14	8	-1.27	0.101	1794	0.992	0.899	16136	0.998
SPERT	-5.14	8	-1.27	0.101	1795	0.992	0.899	16135	0.998
RPAIN	-5.14	8	-1.27	0.101	1796	0.992	0.899	16134	0.998
SLC13A2	-5.14	8	-1.27	0.101	1797	0.992	0.899	16133	0.998
PRRG4	-5.14	8	-1.27	0.101	1798	0.992	0.899	16132	0.998
USP5	-5.14	8	-1.27	0.101	1799	0.992	0.899	16131	0.998
SSTR4	-5.14	8	-1.27	0.102	1800	0.992	0.898	16130	0.998
GPR126	-5.14	8	-1.27	0.102	1801	0.992	0.898	16129	0.998
CLDN14	-5.13	8	-1.27	0.102	1802	0.992	0.898	16128	0.998
ABT1	-5.13	8	-1.27	0.102	1803	0.992	0.898	16127	0.998
C11orf68	-5.13	8	-1.27	0.102	1804	0.992	0.898	16126	0.998
EMC7	-5.13	8	-1.27	0.102	1805	0.992	0.898	16125	0.998
OR2T1	-5.13	8	-1.27	0.102	1806	0.992	0.898	16124	0.998
DISP2	-5.13	8	-1.27	0.102	1807	0.992	0.898	16123	0.998
HDAC5	-5.13	8	-1.27	0.102	1808	0.992	0.898	16122	0.998
BAG4	-5.13	8	-1.27	0.102	1809	0.992	0.898	16121	0.998
CCDC144A	-4.44	6	-1.27	0.102	1810	0.992	0.898	16120	0.998
NRG1	-5.12	8	-1.27	0.102	1811	0.992	0.898	16119	0.998
FKBP4	-5.12	8	-1.27	0.102	1812	0.992	0.898	16118	0.998
FBXW8	-5.12	8	-1.27	0.102	1813	0.992	0.898	16117	0.998
CEL	-5.12	8	-1.27	0.102	1814	0.992	0.898	16116	0.998
ZNF462	-5.12	8	-1.27	0.102	1815	0.992	0.898	16115	0.998
MFAP1	-5.12	8	-1.27	0.102	1816	0.992	0.898	16114	0.998
COX14	-5.12	8	-1.27	0.102	1817	0.992	0.898	16113	0.998
VAV3	-5.12	8	-1.27	0.102	1818	0.992	0.898	16112	0.998
LRRC10B	-5.12	8	-1.27	0.102	1819	0.992	0.898	16111	0.998
VWA5B2	-5.12	8	-1.27	0.103	1820	0.992	0.897	16110	0.998
ST3GAL6	-5.11	8	-1.27	0.103	1821	0.992	0.897	16109	0.998
C6orf48	-5.11	8	-1.27	0.103	1822	0.992	0.897	16108	0.998
RASL11A	-5.1	8	-1.26	0.103	1823	0.992	0.897	16107	0.998
HOXC10	-5.1	8	-1.26	0.103	1824	0.992	0.897	16106	0.998
SCG3	-5.1	8	-1.26	0.103	1825	0.992	0.897	16105	0.998
TRPA1	-5.1	8	-1.26	0.103	1826	0.992	0.897	16104	0.998
POMK	-5.1	8	-1.26	0.103	1827	0.992	0.897	16103	0.998
CLLU1OS	-5.1	8	-1.26	0.103	1828	0.992	0.897	16102	0.998
SCD	-5.1	8	-1.26	0.103	1829	0.992	0.897	16101	0.998
ARHGEF38	-5.1	8	-1.26	0.103	1830	0.992	0.897	16100	0.998
ZNF780B	-5.1	8	-1.26	0.104	1831	0.992	0.896	16099	0.998
GVQW1	-5.09	8	-1.26	0.104	1832	0.992	0.896	16098	0.998
PATL1	-5.09	8	-1.26	0.104	1833	0.992	0.896	16097	0.998
IFITM5	-5.09	8	-1.26	0.104	1834	0.992	0.896	16096	0.998
CDX1	-5.09	8	-1.26	0.104	1835	0.992	0.896	16095	0.998
RGS4	-5.09	8	-1.26	0.104	1836	0.992	0.896	16094	0.998
MANSC1	-5.09	8	-1.26	0.104	1837	0.992	0.896	16093	0.998
MICU3	-5.08	8	-1.26	0.104	1838	0.992	0.896	16092	0.998
CORO1C	-5.08	8	-1.26	0.104	1839	0.992	0.896	16091	0.998
TPRX2P	-5.08	8	-1.26	0.104	1840	0.992	0.896	16090	0.998
ASTL	-5.08	8	-1.26	0.104	1841	0.992	0.896	16089	0.998
RPGR	-5.08	8	-1.26	0.104	1842	0.992	0.896	16088	0.998
SLC25A23	-5.08	8	-1.26	0.104	1843	0.992	0.896	16087	0.998
OPALIN	-5.08	8	-1.26	0.104	1844	0.992	0.896	16086	0.998
ATRNL1	-5.08	8	-1.26	0.104	1845	0.992	0.896	16085	0.998
ATP6V1F	-5.08	8	-1.26	0.104	1846	0.992	0.896	16084	0.998
MFAP5	-5.08	8	-1.26	0.104	1847	0.992	0.896	16083	0.998
QARS	-5.08	8	-1.26	0.105	1848	0.992	0.895	16082	0.998
CETP	-5.07	8	-1.26	0.105	1849	0.992	0.895	16081	0.998
ATRIP	-5.07	8	-1.25	0.105	1850	0.992	0.895	16080	0.998
ATP6V0E2	-5.07	8	-1.25	0.105	1851	0.992	0.895	16079	0.998
CLDN20	-5.07	8	-1.25	0.105	1852	0.992	0.895	16078	0.998
DIP2A	-5.06	8	-1.25	0.105	1853	0.992	0.895	16077	0.998
RAP2A	-5.06	8	-1.25	0.105	1854	0.992	0.895	16076	0.998
CCDC85C	-5.06	8	-1.25	0.105	1855	0.992	0.895	16075	0.998
DGKE	-5.06	8	-1.25	0.105	1856	0.992	0.895	16074	0.998
JAZF1	-5.06	8	-1.25	0.105	1857	0.992	0.895	16073	0.998
SYNGAP1	-5.06	8	-1.25	0.105	1858	0.992	0.895	16072	0.998
DCUN1D4	-5.06	8	-1.25	0.105	1859	0.992	0.895	16071	0.998
OR5D14	-5.06	8	-1.25	0.105	1860	0.992	0.895	16070	0.998
RPSA	-5.05	8	-1.25	0.106	1861	0.992	0.894	16069	0.998
ATG12	-5.05	8	-1.25	0.106	1862	0.992	0.894	16068	0.998
MCMBP	-5.05	8	-1.25	0.106	1863	0.992	0.894	16067	0.998
INHBB	-5.05	8	-1.25	0.106	1864	0.992	0.894	16066	0.998
C1orf146	-3.57	4	-1.25	0.106	1865	0.992	0.894	16065	0.998
MSRA	-5.05	8	-1.25	0.106	1866	0.992	0.894	16064	0.998
DCTN2	-5.05	8	-1.25	0.106	1867	0.992	0.894	16063	0.998
MRPS17	-5.05	8	-1.25	0.106	1868	0.992	0.894	16062	0.998
PLOD1	-5.05	8	-1.25	0.106	1869	0.992	0.894	16061	0.998
TBL2	-5.05	8	-1.25	0.106	1870	0.992	0.894	16060	0.998
ATXN2L	-5.05	8	-1.25	0.106	1871	0.992	0.894	16059	0.998
PPP4R1L	-5.04	8	-1.25	0.106	1872	0.992	0.894	16058	0.998
ZNHIT2	-5.04	8	-1.25	0.106	1873	0.992	0.894	16057	0.998
ACOX3	-5.04	8	-1.25	0.106	1874	0.992	0.894	16056	0.998
NRK	-5.04	8	-1.25	0.106	1875	0.992	0.894	16055	0.998
MFHAS1	-5.04	8	-1.25	0.106	1876	0.992	0.894	16054	0.998
GGPS1	-5.04	8	-1.25	0.106	1877	0.992	0.894	16053	0.998
FAM43B	-5.04	8	-1.25	0.106	1878	0.992	0.894	16052	0.998
CCL22	-5.04	8	-1.25	0.106	1879	0.992	0.894	16051	0.998
TNFAIP3	-5.04	8	-1.25	0.106	1880	0.992	0.894	16050	0.998
PTGER4	-5.04	8	-1.25	0.106	1881	0.992	0.894	16049	0.998
OR5M8	-5.03	8	-1.24	0.107	1882	0.992	0.893	16048	0.998
FTCD	-5.03	8	-1.24	0.107	1883	0.992	0.893	16047	0.998
RUFY2	-5.03	8	-1.24	0.107	1884	0.992	0.893	16046	0.998
DRG1	-5.03	8	-1.24	0.107	1885	0.992	0.893	16045	0.998
PNRC2	-5.03	8	-1.24	0.107	1886	0.992	0.893	16044	0.998
SDCCAG3	-5.03	8	-1.24	0.107	1887	0.992	0.893	16043	0.998
CASKIN2	-5.02	8	-1.24	0.107	1888	0.992	0.893	16042	0.998
CYP27C1	-5.02	8	-1.24	0.107	1889	0.992	0.893	16041	0.998
MAP1A	-5.02	8	-1.24	0.107	1890	0.992	0.893	16040	0.998
TCEB3B	-5.01	8	-1.24	0.108	1891	0.992	0.892	16039	0.998
SLC6A11	-5.01	8	-1.24	0.108	1892	0.992	0.892	16038	0.998
SETD8	-5.01	8	-1.24	0.108	1893	0.992	0.892	16037	0.998
NKG7	-5.01	8	-1.24	0.108	1894	0.992	0.892	16036	0.998
MAGT1	-5.01	8	-1.24	0.108	1895	0.992	0.892	16035	0.998
PABPC1	-5.01	8	-1.24	0.108	1896	0.992	0.892	16034	0.998
DUXA	-5.01	8	-1.24	0.108	1897	0.992	0.892	16033	0.998
GPR21	-5.01	8	-1.24	0.108	1898	0.992	0.892	16032	0.998
ZNF596	-5.01	8	-1.24	0.108	1899	0.992	0.892	16031	0.998
RGMA	-5	8	-1.24	0.108	1900	0.992	0.892	16030	0.998
ANAPC13	-5	8	-1.24	0.108	1901	0.992	0.892	16029	0.998
SPACA4	-5	8	-1.24	0.108	1902	0.992	0.892	16028	0.998
EZH1	-5	8	-1.24	0.108	1903	0.992	0.892	16027	0.998
SNRPB	-5	8	-1.24	0.108	1904	0.992	0.892	16026	0.998
FAM150A	-5	8	-1.24	0.108	1905	0.992	0.892	16025	0.998
MYH4	-4.99	8	-1.23	0.109	1906	0.992	0.891	16024	0.997
BBOX1	-4.99	8	-1.23	0.109	1907	0.992	0.891	16023	0.997
GTF2H4	-4.99	8	-1.23	0.109	1908	0.992	0.891	16022	0.997
RFTN1	-4.99	8	-1.23	0.109	1909	0.992	0.891	16021	0.997
SCN3B	-4.99	8	-1.23	0.109	1910	0.992	0.891	16020	0.997
FUBP1	-4.99	8	-1.23	0.109	1911	0.992	0.891	16019	0.997
WFDC5	-4.32	6	-1.23	0.109	1912	0.992	0.891	16018	0.997
PLA2G15	-4.66	7	-1.23	0.109	1913	0.992	0.891	16017	0.997
CD164	-4.98	8	-1.23	0.109	1914	0.992	0.891	16016	0.997
RAB14	-4.98	8	-1.23	0.109	1915	0.992	0.891	16015	0.997
HIST2H2AC	-2.49	2	-1.23	0.109	1916	0.992	0.891	16014	0.997
ELMOD3	-4.98	8	-1.23	0.109	1917	0.992	0.891	16013	0.997
MYO1G	-4.98	8	-1.23	0.109	1918	0.992	0.891	16012	0.997
PABPC3	-4.97	8	-1.23	0.11	1919	0.992	0.89	16011	0.997
TRIP6	-4.97	8	-1.23	0.11	1920	0.992	0.89	16010	0.997
CAMLG	-4.97	8	-1.23	0.11	1921	0.992	0.89	16009	0.997
BPIFB2	-4.97	8	-1.23	0.11	1922	0.992	0.89	16008	0.997
SIRT3	-4.97	8	-1.23	0.11	1923	0.992	0.89	16007	0.997
MTMR3	-4.97	8	-1.23	0.11	1924	0.992	0.89	16006	0.997
CARHSP1	-4.97	8	-1.23	0.11	1925	0.992	0.89	16005	0.997
IPP	-4.97	8	-1.23	0.11	1926	0.992	0.89	16004	0.997
MOSPD2	-4.97	8	-1.23	0.11	1927	0.992	0.89	16003	0.997
SPIC	-4.97	8	-1.23	0.11	1928	0.992	0.89	16002	0.997
ZCCHC17	-4.97	8	-1.23	0.11	1929	0.992	0.89	16001	0.997
RABGGTA	-4.97	8	-1.23	0.11	1930	0.992	0.89	16000	0.997
DESI2	-4.97	8	-1.23	0.11	1931	0.992	0.89	15999	0.997
NOS3	-4.97	8	-1.23	0.11	1932	0.992	0.89	15998	0.997
SH3BP1	-4.97	8	-1.23	0.11	1933	0.992	0.89	15997	0.997
POF1B	-4.97	8	-1.23	0.11	1934	0.992	0.89	15996	0.997
TULP3	-4.97	8	-1.23	0.11	1935	0.992	0.89	15995	0.997
ZNF283	-4.96	8	-1.23	0.11	1936	0.992	0.89	15994	0.997
UGT1A10	-3.51	4	-1.23	0.11	1937	0.992	0.89	15993	0.997
ABCA2	-4.96	8	-1.23	0.11	1938	0.992	0.89	15992	0.997
FAM69A	-4.96	8	-1.22	0.11	1939	0.992	0.89	15991	0.997
HEXDC	-4.96	8	-1.22	0.11	1940	0.992	0.89	15990	0.997
TMEM89	-4.96	8	-1.22	0.11	1941	0.992	0.89	15989	0.997
WDR49	-4.96	8	-1.22	0.11	1942	0.992	0.89	15988	0.997
SMCP	-4.96	8	-1.22	0.11	1943	0.992	0.89	15987	0.997
RPS12	-3.5	4	-1.22	0.11	1944	0.992	0.89	15986	0.997
SLC25A31	-4.96	8	-1.22	0.111	1945	0.992	0.889	15985	0.997
ANKRD33	-4.95	8	-1.22	0.111	1946	0.992	0.889	15984	0.997
C12orf23	-4.95	8	-1.22	0.111	1947	0.992	0.889	15983	0.997
COL10A1	-4.95	8	-1.22	0.111	1948	0.992	0.889	15982	0.997
LRRC29	-4.95	8	-1.22	0.111	1949	0.992	0.889	15981	0.997
TRERF1	-4.95	8	-1.22	0.111	1950	0.992	0.889	15980	0.997
C16orf92	-4.95	8	-1.22	0.111	1951	0.992	0.889	15979	0.997
EVI2B	-4.94	8	-1.22	0.111	1952	0.992	0.889	15978	0.997
PHB	-4.94	8	-1.22	0.111	1953	0.992	0.889	15977	0.997
SHC1	-4.94	8	-1.22	0.111	1954	0.992	0.889	15976	0.997
TMPRSS5	-4.94	8	-1.22	0.111	1955	0.992	0.889	15975	0.997
MPZL3	-4.94	8	-1.22	0.112	1956	0.992	0.888	15974	0.997
LRP6	-4.93	8	-1.22	0.112	1957	0.992	0.888	15973	0.997
RPL38	-4.62	7	-1.22	0.112	1958	0.992	0.888	15972	0.997
CRELD2	-4.93	8	-1.22	0.112	1959	0.992	0.888	15971	0.997
C1QL2	-4.93	8	-1.22	0.112	1960	0.992	0.888	15970	0.997
CRMP1	-4.93	8	-1.22	0.112	1961	0.992	0.888	15969	0.997
AMELX	-4.93	8	-1.22	0.112	1962	0.992	0.888	15968	0.997
GPR78	-4.93	8	-1.22	0.112	1963	0.992	0.888	15967	0.997
SLC45A4	-4.93	8	-1.22	0.112	1964	0.992	0.888	15966	0.997
PLEKHM1	-4.93	8	-1.22	0.112	1965	0.992	0.888	15965	0.997
SLC2A8	-4.93	8	-1.22	0.112	1966	0.992	0.888	15964	0.997
MATN1	-4.92	8	-1.22	0.112	1967	0.992	0.888	15963	0.997
EDN1	-4.92	8	-1.22	0.112	1968	0.992	0.888	15962	0.997
ANKRD16	-4.92	8	-1.21	0.112	1969	0.992	0.888	15961	0.997
VTN	-4.92	8	-1.21	0.112	1970	0.992	0.888	15960	0.997
OR13F1	-4.92	8	-1.21	0.112	1971	0.992	0.888	15959	0.997
WNK4	-4.92	8	-1.21	0.112	1972	0.992	0.888	15958	0.997
HIST1H2BK	-4.26	6	-1.21	0.112	1973	0.992	0.888	15957	0.997
KIAA1109	-4.92	8	-1.21	0.112	1974	0.992	0.888	15956	0.997
PACSIN1	-4.92	8	-1.21	0.113	1975	0.992	0.887	15955	0.997
CFB	-4.92	8	-1.21	0.113	1976	0.992	0.887	15954	0.997
ATP11B	-4.92	8	-1.21	0.113	1977	0.992	0.887	15953	0.997
PCDH19	-4.92	8	-1.21	0.113	1978	0.992	0.887	15952	0.997
CXorf58	-4.92	8	-1.21	0.113	1979	0.992	0.887	15951	0.997
CYP4A11	-4.26	6	-1.21	0.113	1980	0.992	0.887	15950	0.997
PTBP1	-4.91	8	-1.21	0.113	1981	0.992	0.887	15949	0.997
FAM76A	-4.91	8	-1.21	0.113	1982	0.992	0.887	15948	0.997
ICAM2	-4.91	8	-1.21	0.113	1983	0.992	0.887	15947	0.997
SPTBN4	-4.91	8	-1.21	0.113	1984	0.992	0.887	15946	0.997
NEUROG1	-4.91	8	-1.21	0.113	1985	0.992	0.887	15945	0.997
PGF	-4.91	8	-1.21	0.113	1986	0.992	0.887	15944	0.997
WSB2	-4.91	8	-1.21	0.113	1987	0.992	0.887	15943	0.997
C7orf13	-4.91	8	-1.21	0.113	1988	0.992	0.887	15942	0.997
MRPL35	-4.91	8	-1.21	0.113	1989	0.992	0.887	15941	0.997
USP2	-4.91	8	-1.21	0.113	1990	0.992	0.887	15940	0.997
CLIP3	-4.91	8	-1.21	0.113	1991	0.992	0.887	15939	0.997
ABLIM3	-4.9	8	-1.21	0.113	1992	0.992	0.887	15938	0.997
OAZ3	-4.9	8	-1.21	0.113	1993	0.992	0.887	15937	0.997
FREM1	-4.9	8	-1.21	0.113	1994	0.992	0.887	15936	0.997
ATPAF1	-4.9	8	-1.21	0.113	1995	0.992	0.887	15935	0.997
CAMSAP1	-4.9	8	-1.21	0.113	1996	0.992	0.887	15934	0.997
EMILIN3	-4.9	8	-1.21	0.114	1997	0.992	0.886	15933	0.997
HSD11B2	-4.9	8	-1.21	0.114	1998	0.992	0.886	15932	0.997
MACROD1	-4.89	8	-1.21	0.114	1999	0.992	0.886	15931	0.997
[truncated: 15,930 more rows]

## Sheet: PARG KO
GENE	sumZ	numObs	normZ	pval_synth	rank_synth	fdr_synth	pval_supp	rank_supp	fdr_supp
ARH3	-36.23	8	-7.7	6.71e-15	1	1.2e-10	1	17928	1
CHD1L	-28.82	8	-6.07	6.34e-10	2	5.68e-06	1	17927	1
POLB	-28.06	8	-5.9	1.79e-09	3	1.07e-05	1	17926	1
HPF1	-26.86	8	-5.64	8.55e-09	4	3.83e-05	1	17925	1
SOCS3	-25.24	8	-5.28	6.36e-08	5	0.000228	1	17924	1
H2AFZ	-24.04	8	-5.02	2.59e-07	6	0.000774	1	17923	1
STK40	-22.6	8	-4.7	1.29e-06	7	0.00331	1	17922	1
LIG3	-22.14	8	-4.6	2.11e-06	8	0.00441	1	17921	1
XPO7	-22.09	8	-4.59	2.21e-06	9	0.00441	1	17920	1
DUSP1	-21.83	8	-4.53	2.91e-06	10	0.00521	1	17919	1
TP53	-21.67	8	-4.5	3.43e-06	11	0.0056	1	17918	1
SIAH1	-20.95	8	-4.34	7.16e-06	12	0.0107	1	17917	1
SIVA1	-20.85	8	-4.32	7.92e-06	13	0.0109	1	17916	1
ZFYVE20	-19.18	8	-3.95	3.93e-05	14	0.0487	1	17915	1
FLII	-19.14	8	-3.94	4.07e-05	15	0.0487	1	17914	1
XRCC1	-18.94	8	-3.9	4.88e-05	16	0.0498	1	17913	1
NCOA5	-18.93	8	-3.89	4.93e-05	17	0.0498	1	17912	1
PSD2	-18.91	8	-3.89	5e-05	18	0.0498	1	17911	1
DNTTIP1	-18.64	8	-3.83	6.38e-05	19	0.0602	1	17910	1
ARID4A	-18.37	8	-3.77	8.11e-05	20	0.0682	1	17909	1
LIG1	-18.32	8	-3.76	8.47e-05	21	0.0682	1	17908	1
NF2	-18.31	8	-3.76	8.59e-05	22	0.0682	1	17907	1
MEMO1	-18.29	8	-3.75	8.75e-05	23	0.0682	1	17906	1
TAOK1	-18.07	8	-3.71	0.000105	24	0.0788	1	17905	1
PCGF1	-15.24	6	-3.6	0.000158	25	0.112	1	17904	1
ZIC2	-17.57	8	-3.59	0.000163	26	0.112	1	17903	1
VPS37A	-17.15	8	-3.5	0.000231	27	0.153	1	17902	1
KDM3B	-17.1	8	-3.49	0.000239	28	0.153	1	17901	1
C16orf72	-14.78	6	-3.48	0.000247	29	0.153	1	17900	1
SCAF8	-17	8	-3.47	0.000262	30	0.156	1	17899	1
RFWD2	-16.94	8	-3.46	0.000273	31	0.158	1	17898	1
ZNF638	-16.62	8	-3.39	0.000355	32	0.199	1	17897	1
UBIAD1	-16.34	8	-3.32	0.000443	33	0.241	1	17896	1
POLE4	-16.16	8	-3.28	0.000511	34	0.269	0.999	17895	1
SRCAP	-15.98	8	-3.24	0.000588	35	0.296	0.999	17894	1
DET1	-15.93	8	-3.23	0.000612	36	0.296	0.999	17893	1
NMUR2	-15.92	8	-3.23	0.000615	37	0.296	0.999	17892	1
RPRD1B	-15.89	8	-3.23	0.000627	38	0.296	0.999	17891	1
E2F8	-15.83	8	-3.21	0.000658	39	0.303	0.999	17890	1
WEE1	-13.57	6	-3.18	0.000746	40	0.332	0.999	17889	1
MLH1	-13.55	6	-3.17	0.000759	41	0.332	0.999	17888	1
UMPS	-15.59	8	-3.16	0.000789	42	0.337	0.999	17887	1
TGIF2	-15.29	8	-3.09	0.000989	43	0.412	0.999	17886	1
KPNA3	-15.11	8	-3.05	0.00113	44	0.458	0.999	17885	1
GGNBP2	-13.05	6	-3.04	0.00116	45	0.458	0.999	17884	1
SMARCAD1	-15.06	8	-3.04	0.00117	46	0.458	0.999	17883	1
FAM107A	-15	8	-3.03	0.00122	47	0.459	0.999	17882	1
POLD3	-10.6	4	-3.03	0.00123	48	0.459	0.999	17881	1
PSMA8	-14.81	8	-2.99	0.00141	49	0.511	0.999	17880	1
CCNF	-12.8	6	-2.98	0.00143	50	0.511	0.999	17879	1
UBE2N	-10.44	4	-2.98	0.00145	51	0.511	0.999	17878	1
SRSF6	-14.6	8	-2.94	0.00164	52	0.551	0.998	17877	1
PMVK	-14.58	8	-2.94	0.00165	53	0.551	0.998	17876	1
SLC38A10	-14.58	8	-2.94	0.00166	54	0.551	0.998	17875	1
UBE3D	-14.53	8	-2.93	0.00171	55	0.558	0.998	17874	1
NUDCD1	-14.46	8	-2.91	0.00181	56	0.578	0.998	17873	1
MYH9	-14.43	8	-2.9	0.00185	57	0.581	0.998	17872	1
LATS2	-14.3	8	-2.87	0.00202	58	0.625	0.998	17871	1
RNF113A	-14.19	8	-2.85	0.00218	59	0.65	0.998	17870	1
USPL1	-14.19	8	-2.85	0.00218	60	0.65	0.998	17869	1
SLC16A13	-14.17	8	-2.85	0.00221	61	0.65	0.998	17868	1
OXER1	-14.07	8	-2.83	0.00236	62	0.684	0.998	17867	1
OR8B4	-14.04	8	-2.82	0.00241	63	0.686	0.998	17866	1
PAIP2	-14	8	-2.81	0.00249	64	0.687	0.998	17865	1
DPH1	-13.99	8	-2.81	0.00251	65	0.687	0.997	17864	1
FAM212A	-12.1	6	-2.8	0.00253	66	0.687	0.997	17863	1
RABGEF1	-13.88	8	-2.78	0.00269	67	0.719	0.997	17862	1
HEATR3	-13.84	8	-2.77	0.00277	68	0.731	0.997	17861	1
INTS12	-13.78	8	-2.76	0.00288	69	0.734	0.997	17860	1
GSG1	-13.78	8	-2.76	0.00288	70	0.734	0.997	17859	1
RBM12	-13.76	8	-2.76	0.00292	71	0.734	0.997	17858	1
MVD	-13.75	8	-2.75	0.00295	72	0.734	0.997	17857	1
LRRC41	-13.72	8	-2.75	0.00301	73	0.735	0.997	17856	1
TTC9	-13.7	8	-2.74	0.00303	74	0.735	0.997	17855	1
PDXDC1	-13.62	8	-2.73	0.0032	75	0.749	0.997	17854	1
LONRF2	-11.8	6	-2.73	0.00321	76	0.749	0.997	17853	1
LARP7	-13.62	8	-2.72	0.00322	77	0.749	0.997	17852	1
ITPA	-13.57	8	-2.71	0.00332	78	0.763	0.997	17851	1
HEXIM1	-13.52	8	-2.7	0.00343	79	0.778	0.997	17850	1
DPF2	-13.5	8	-2.7	0.00347	80	0.778	0.997	17849	1
LacZ	-61.92	170	-2.68	0.00363	81	0.805	0.996	17848	1
ACTR6	-13.35	8	-2.67	0.00383	82	0.836	0.996	17847	1
EDC4	-13.34	8	-2.66	0.00387	83	0.836	0.996	17846	1
PURA	-13.28	8	-2.65	0.00403	84	0.858	0.996	17845	1
GLRA2	-13.26	8	-2.65	0.00407	85	0.858	0.996	17844	1
KLF6	-13.17	8	-2.63	0.00432	86	0.9	0.996	17843	1
ATP1A1	-13.09	8	-2.61	0.00454	87	0.935	0.995	17842	1
MS4A6E	-13.07	8	-2.6	0.00461	88	0.936	0.995	17841	1
DEPDC7	-13.05	8	-2.6	0.00464	89	0.936	0.995	17840	1
GHDC	-12.98	8	-2.58	0.00489	90	0.942	0.995	17839	1
UNG	-12.97	8	-2.58	0.00492	91	0.942	0.995	17838	1
RAB5C	-12.96	8	-2.58	0.00494	92	0.942	0.995	17837	1
SLC18A1	-12.88	8	-2.56	0.0052	93	0.942	0.995	17836	1
CD300LB	-12.84	8	-2.55	0.00532	94	0.942	0.995	17835	1
PCDHB5	-12.81	8	-2.55	0.00544	95	0.942	0.995	17834	1
CDKN1A	-12.81	8	-2.55	0.00544	96	0.942	0.995	17833	1
ZMYM3	-12.8	8	-2.55	0.00546	97	0.942	0.995	17832	1
SUDS3	-12.79	8	-2.54	0.0055	98	0.942	0.994	17831	1
TADA2A	-12.77	8	-2.54	0.00557	99	0.942	0.994	17830	1
CES5A	-12.72	8	-2.53	0.00575	100	0.942	0.994	17829	1
POLE3	-12.71	8	-2.52	0.00579	101	0.942	0.994	17828	1
KIAA0141	-12.69	8	-2.52	0.00584	102	0.942	0.994	17827	1
DNAJC24	-12.69	8	-2.52	0.00586	103	0.942	0.994	17826	1
AP1B1	-10.89	6	-2.49	0.0063	104	0.942	0.994	17825	0.999
SLC6A4	-12.57	8	-2.49	0.00632	105	0.942	0.994	17824	0.999
SMCHD1	-12.56	8	-2.49	0.00632	106	0.942	0.994	17823	0.999
MVK	-10.87	6	-2.49	0.00637	107	0.942	0.994	17822	0.999
USP22	-12.52	8	-2.48	0.0065	108	0.942	0.994	17821	0.999
NT5DC4	-12.51	8	-2.48	0.00655	109	0.942	0.993	17820	0.999
EGR4	-12.51	8	-2.48	0.00656	110	0.942	0.993	17819	0.999
KDM5C	-12.48	8	-2.47	0.00668	111	0.942	0.993	17818	0.999
TMEM129	-12.47	8	-2.47	0.00671	112	0.942	0.993	17817	0.999
TBCC	-12.46	8	-2.47	0.00674	113	0.942	0.993	17816	0.999
HNRNPF	-12.42	8	-2.46	0.0069	114	0.942	0.993	17815	0.999
LZTR1	-12.42	8	-2.46	0.00691	115	0.942	0.993	17814	0.999
RPS6KA2	-12.38	8	-2.45	0.00708	116	0.942	0.993	17813	0.999
RFC4	-11.55	7	-2.45	0.00721	117	0.942	0.993	17812	0.999
DDX24	-12.34	8	-2.44	0.00725	118	0.942	0.993	17811	0.999
PDCD11	-12.32	8	-2.44	0.00735	119	0.942	0.993	17810	0.999
RSBN1L	-12.31	8	-2.44	0.0074	120	0.942	0.993	17809	0.999
ZNF354B	-12.27	8	-2.43	0.00759	121	0.942	0.992	17808	0.999
FEN1	-6.12	2	-2.42	0.00772	122	0.942	0.992	17807	0.999
FAM71B	-12.2	8	-2.41	0.00792	123	0.942	0.992	17806	0.999
PICALM	-12.19	8	-2.41	0.00794	124	0.942	0.992	17805	0.999
PTH2R	-12.19	8	-2.41	0.00795	125	0.942	0.992	17804	0.999
KPNA4	-12.17	8	-2.41	0.00807	126	0.942	0.992	17803	0.999
LRAT	-12.16	8	-2.4	0.00812	127	0.942	0.992	17802	0.999
DAGLB	-12.12	8	-2.4	0.00828	128	0.942	0.992	17801	0.999
ATOH8	-12.12	8	-2.39	0.00832	129	0.942	0.992	17800	0.999
E2F4	-12.12	8	-2.39	0.00832	130	0.942	0.992	17799	0.999
TERF1	-12.08	8	-2.39	0.00847	131	0.942	0.992	17798	0.999
LARP4B	-12.05	8	-2.38	0.00864	132	0.942	0.991	17797	0.999
STAG2	-12.05	8	-2.38	0.00864	133	0.942	0.991	17796	0.999
CLPTM1L	-12.01	8	-2.37	0.00884	134	0.942	0.991	17795	0.999
MUS81	-11.99	8	-2.37	0.00898	135	0.942	0.991	17794	0.998
SPINK14	-11.91	8	-2.35	0.00939	136	0.942	0.991	17793	0.998
PNKP	-11.88	8	-2.34	0.00958	137	0.942	0.99	17792	0.998
RPS6KB1	-11.84	8	-2.33	0.0098	138	0.942	0.99	17791	0.998
NCAM2	-11.84	8	-2.33	0.00982	139	0.942	0.99	17790	0.998
TNFRSF1B	-11.82	8	-2.33	0.00993	140	0.942	0.99	17789	0.998
AGGF1	-11.82	8	-2.33	0.00994	141	0.942	0.99	17788	0.998
INPPL1	-11.8	8	-2.33	0.01	142	0.942	0.99	17787	0.998
ZNF213	-11.8	8	-2.33	0.01	143	0.942	0.99	17786	0.998
GID8	-11.78	8	-2.32	0.0101	144	0.942	0.99	17785	0.998
VIM	-11.77	8	-2.32	0.0102	145	0.942	0.99	17784	0.998
NUP188	-11.73	8	-2.31	0.0105	146	0.942	0.99	17783	0.998
AATF	-11.68	8	-2.3	0.0107	147	0.942	0.989	17782	0.997
TMEM150C	-11.67	8	-2.3	0.0108	148	0.942	0.989	17781	0.997
SREK1	-11.66	8	-2.3	0.0109	149	0.942	0.989	17780	0.997
ELMSAN1	-11.66	8	-2.29	0.0109	150	0.942	0.989	17779	0.997
LAPTM4A	-11.64	8	-2.29	0.011	151	0.942	0.989	17778	0.997
CCNDBP1	-11.64	8	-2.29	0.011	152	0.942	0.989	17777	0.997
SLC25A1	-11.63	8	-2.29	0.0111	153	0.942	0.989	17776	0.997
EPHB3	-11.63	8	-2.29	0.0111	154	0.942	0.989	17775	0.997
TXNDC9	-11.62	8	-2.29	0.0111	155	0.942	0.989	17774	0.997
PRR3	-11.62	8	-2.29	0.0111	156	0.942	0.989	17773	0.997
RRM2B	-11.6	8	-2.28	0.0113	157	0.942	0.989	17772	0.997
THUMPD1	-11.59	8	-2.28	0.0114	158	0.942	0.989	17771	0.997
LSG1	-10.02	6	-2.28	0.0114	159	0.942	0.989	17770	0.997
CABYR	-11.56	8	-2.27	0.0115	160	0.942	0.988	17769	0.997
BAG5	-11.49	8	-2.26	0.012	161	0.942	0.988	17768	0.997
POMC	-11.48	8	-2.26	0.012	162	0.942	0.988	17767	0.997
TRIP12	-11.48	8	-2.25	0.0121	163	0.942	0.988	17766	0.997
TMOD3	-11.46	8	-2.25	0.0122	164	0.942	0.988	17765	0.997
CHD1	-11.4	8	-2.24	0.0126	165	0.942	0.987	17764	0.996
SEPHS2	-11.4	8	-2.24	0.0127	166	0.942	0.987	17763	0.996
C4orf3	-11.36	8	-2.23	0.0129	167	0.942	0.987	17762	0.996
ZNF703	-11.36	8	-2.23	0.013	168	0.942	0.987	17761	0.996
GPRC5B	-11.35	8	-2.23	0.013	169	0.942	0.987	17760	0.996
STAC3	-11.34	8	-2.22	0.013	170	0.942	0.987	17759	0.996
HIGD1B	-11.34	8	-2.22	0.0131	171	0.942	0.987	17758	0.996
DCP1B	-11.33	8	-2.22	0.0132	172	0.942	0.987	17757	0.996
KRT35	-11.31	8	-2.22	0.0133	173	0.942	0.987	17756	0.996
HIST1H2AG	-5.65	2	-2.22	0.0134	174	0.942	0.987	17755	0.996
MGAT4A	-11.3	8	-2.21	0.0134	175	0.942	0.987	17754	0.996
AFTPH	-11.29	8	-2.21	0.0134	176	0.942	0.987	17753	0.996
MBNL2	-11.28	8	-2.21	0.0135	177	0.942	0.986	17752	0.996
TIAL1	-11.28	8	-2.21	0.0135	178	0.942	0.986	17751	0.996
TMEM52B	-11.27	8	-2.21	0.0136	179	0.942	0.986	17750	0.996
ING5	-9.76	6	-2.21	0.0136	180	0.942	0.986	17749	0.996
VAX2	-11.26	8	-2.21	0.0137	181	0.942	0.986	17748	0.996
CATSPER1	-11.23	8	-2.2	0.0139	182	0.942	0.986	17747	0.996
TM4SF5	-11.22	8	-2.2	0.014	183	0.942	0.986	17746	0.996
C4orf19	-11.22	8	-2.2	0.014	184	0.942	0.986	17745	0.996
APOA4	-11.22	8	-2.2	0.014	185	0.942	0.986	17744	0.996
GTF2IRD1	-11.21	8	-2.2	0.0141	186	0.942	0.986	17743	0.996
USP5	-10.46	7	-2.19	0.0143	187	0.942	0.986	17742	0.996
GH1	-11.16	8	-2.18	0.0145	188	0.942	0.986	17741	0.996
CMTM5	-11.16	8	-2.18	0.0145	189	0.942	0.986	17740	0.996
SS18	-11.14	8	-2.18	0.0146	190	0.942	0.985	17739	0.996
PAH	-11.08	8	-2.17	0.0151	191	0.942	0.985	17738	0.995
PDS5A	-11.07	8	-2.16	0.0152	192	0.942	0.985	17737	0.995
APOL6	-11.04	8	-2.16	0.0154	193	0.942	0.985	17736	0.995
ESX1	-11.04	8	-2.16	0.0154	194	0.942	0.985	17735	0.995
ELOVL3	-11.02	8	-2.15	0.0156	195	0.942	0.984	17734	0.995
PGAM5	-11.02	8	-2.15	0.0157	196	0.942	0.984	17733	0.995
RXFP3	-11	8	-2.15	0.0158	197	0.942	0.984	17732	0.995
SNRPB2	-10.99	8	-2.15	0.0159	198	0.942	0.984	17731	0.995
APLNR	-10.96	8	-2.14	0.0161	199	0.942	0.984	17730	0.995
RING1	-10.96	8	-2.14	0.0162	200	0.942	0.984	17729	0.995
EIF6	-9.48	6	-2.14	0.0163	201	0.942	0.984	17728	0.995
ZNF511	-10.92	8	-2.13	0.0165	202	0.942	0.983	17727	0.995
OR5AS1	-10.91	8	-2.13	0.0166	203	0.942	0.983	17726	0.995
BRD1	-10.89	8	-2.13	0.0168	204	0.942	0.983	17725	0.995
SPACA7	-10.87	8	-2.12	0.017	205	0.942	0.983	17724	0.994
PGM2	-10.84	8	-2.11	0.0172	206	0.942	0.983	17723	0.994
FBXW10	-10.84	8	-2.11	0.0173	207	0.942	0.983	17722	0.994
POFUT1	-10.84	8	-2.11	0.0173	208	0.942	0.983	17721	0.994
CAPRIN1	-10.83	8	-2.11	0.0173	209	0.942	0.983	17720	0.994
DNASE1L2	-10.82	8	-2.11	0.0175	210	0.942	0.983	17719	0.994
HNRNPA3	-10.82	8	-2.11	0.0175	211	0.942	0.983	17718	0.994
RAP1B	-5.39	2	-2.1	0.0179	212	0.942	0.982	17717	0.994
GRM5	-10.77	8	-2.1	0.0179	213	0.942	0.982	17716	0.994
OR6Q1	-10.76	8	-2.1	0.0181	214	0.942	0.982	17715	0.994
ZNF131	-10.75	8	-2.09	0.0181	215	0.942	0.982	17714	0.994
C2CD2	-10.73	8	-2.09	0.0183	216	0.942	0.982	17713	0.994
INHBB	-10.72	8	-2.09	0.0184	217	0.942	0.982	17712	0.994
SIRPA	-10.72	8	-2.09	0.0184	218	0.942	0.982	17711	0.994
TMEM87A	-10.71	8	-2.09	0.0185	219	0.942	0.982	17710	0.994
SLC22A8	-10.67	8	-2.08	0.019	220	0.942	0.981	17709	0.993
RAB35	-10.65	8	-2.07	0.0191	221	0.942	0.981	17708	0.993
LSM5	-7.51	4	-2.06	0.0195	222	0.942	0.981	17707	0.993
RBM26	-10.6	8	-2.06	0.0196	223	0.942	0.98	17706	0.993
MIF	-10.6	8	-2.06	0.0197	224	0.942	0.98	17705	0.993
LACE1	-10.59	8	-2.06	0.0197	225	0.942	0.98	17704	0.993
BHMT	-10.59	8	-2.06	0.0197	226	0.942	0.98	17703	0.993
WT1	-10.59	8	-2.06	0.0198	227	0.942	0.98	17702	0.993
PSTPIP2	-10.58	8	-2.06	0.0199	228	0.942	0.98	17701	0.993
WDR70	-9.14	6	-2.05	0.0201	229	0.942	0.98	17700	0.992
ELOVL2	-10.55	8	-2.05	0.0201	230	0.942	0.98	17699	0.992
ZBTB10	-9.13	6	-2.05	0.0203	231	0.942	0.98	17698	0.992
GAS2L3	-10.53	8	-2.05	0.0204	232	0.942	0.98	17697	0.992
INTS8	-10.53	8	-2.05	0.0204	233	0.942	0.98	17696	0.992
RANBP10	-10.53	8	-2.04	0.0204	234	0.942	0.98	17695	0.992
SCAND1	-10.52	8	-2.04	0.0205	235	0.942	0.98	17694	0.992
SLC26A4	-10.52	8	-2.04	0.0205	236	0.942	0.979	17693	0.992
OGFR	-10.51	8	-2.04	0.0207	237	0.942	0.979	17692	0.992
NF1	-10.48	8	-2.04	0.0209	238	0.942	0.979	17691	0.992
OR13C8	-10.46	8	-2.03	0.0212	239	0.942	0.979	17690	0.992
YWHAE	-10.45	8	-2.03	0.0213	240	0.942	0.979	17689	0.992
BATF2	-10.45	8	-2.03	0.0213	241	0.942	0.979	17688	0.992
DEFB129	-10.43	8	-2.02	0.0214	242	0.942	0.979	17687	0.992
MYO5B	-10.43	8	-2.02	0.0215	243	0.942	0.979	17686	0.992
IRG1	-10.43	8	-2.02	0.0215	244	0.942	0.979	17685	0.992
PHC3	-10.43	8	-2.02	0.0215	245	0.942	0.979	17684	0.992
DRD3	-10.42	8	-2.02	0.0216	246	0.942	0.978	17683	0.992
CRY2	-10.42	8	-2.02	0.0216	247	0.942	0.978	17682	0.992
PPP2R3C	-10.42	8	-2.02	0.0217	248	0.942	0.978	17681	0.992
CORO6	-10.41	8	-2.02	0.0217	249	0.942	0.978	17680	0.992
FBXW7	-10.41	8	-2.02	0.0218	250	0.942	0.978	17679	0.992
EMX1	-10.4	8	-2.02	0.0219	251	0.942	0.978	17678	0.992
PARP8	-10.36	8	-2.01	0.0223	252	0.942	0.978	17677	0.992
PROL1	-10.36	8	-2.01	0.0223	253	0.942	0.978	17676	0.992
GTF3C3	-10.36	8	-2.01	0.0223	254	0.942	0.978	17675	0.992
CCDC115	-10.33	8	-2	0.0227	255	0.942	0.977	17674	0.991
DCUN1D3	-10.32	8	-2	0.0227	256	0.942	0.977	17673	0.991
DND1	-10.31	8	-2	0.0229	257	0.942	0.977	17672	0.991
HADH	-10.31	8	-2	0.023	258	0.942	0.977	17671	0.991
KRT7	-8.92	6	-1.99	0.0231	259	0.942	0.977	17670	0.991
SESN1	-10.29	8	-1.99	0.0232	260	0.942	0.977	17669	0.991
TMEM44	-10.29	8	-1.99	0.0232	261	0.942	0.977	17668	0.991
GFPT1	-10.28	8	-1.99	0.0233	262	0.942	0.977	17667	0.991
OR6B3	-10.28	8	-1.99	0.0233	263	0.942	0.977	17666	0.991
TMEM184A	-10.27	8	-1.99	0.0234	264	0.942	0.977	17665	0.991
INTS1	-10.27	8	-1.99	0.0234	265	0.942	0.977	17664	0.991
AVEN	-10.27	8	-1.99	0.0234	266	0.942	0.977	17663	0.991
DUSP3	-10.26	8	-1.99	0.0235	267	0.942	0.977	17662	0.991
INPP5K	-10.19	8	-1.97	0.0244	268	0.942	0.976	17661	0.99
KIAA1841	-10.19	8	-1.97	0.0244	269	0.942	0.976	17660	0.99
TMX2	-10.19	8	-1.97	0.0244	270	0.942	0.976	17659	0.99
WWC1	-10.18	8	-1.97	0.0245	271	0.942	0.976	17658	0.99
CHPF	-10.18	8	-1.97	0.0245	272	0.942	0.976	17657	0.99
TFAP4	-10.18	8	-1.97	0.0245	273	0.942	0.975	17656	0.99
RCC2	-8.81	6	-1.97	0.0245	274	0.942	0.975	17655	0.99
PCBP3	-10.17	8	-1.97	0.0247	275	0.942	0.975	17654	0.99
RNF217	-10.16	8	-1.97	0.0247	276	0.942	0.975	17653	0.99
PAXBP1	-10.14	8	-1.96	0.0251	277	0.942	0.975	17652	0.99
ANKRD54	-10.13	8	-1.96	0.0251	278	0.942	0.975	17651	0.99
NOD1	-10.13	8	-1.96	0.0252	279	0.942	0.975	17650	0.99
DEFA4	-10.13	8	-1.96	0.0252	280	0.942	0.975	17649	0.99
TOP3B	-10.13	8	-1.96	0.0252	281	0.942	0.975	17648	0.99
GNPTAB	-10.13	8	-1.96	0.0252	282	0.942	0.975	17647	0.99
NGDN	-8.76	6	-1.96	0.0253	283	0.942	0.975	17646	0.99
PAK6	-10.11	8	-1.95	0.0254	284	0.942	0.975	17645	0.99
WFDC8	-10.11	8	-1.95	0.0255	285	0.942	0.975	17644	0.99
ARHGEF19	-10.1	8	-1.95	0.0255	286	0.942	0.974	17643	0.99
SENP6	-10.09	8	-1.95	0.0256	287	0.942	0.974	17642	0.99
A2M	-10.09	8	-1.95	0.0256	288	0.942	0.974	17641	0.99
WNK4	-10.09	8	-1.95	0.0257	289	0.942	0.974	17640	0.99
SYNE1	-10.09	8	-1.95	0.0257	290	0.942	0.974	17639	0.99
NUP35	-10.08	8	-1.95	0.0257	291	0.942	0.974	17638	0.99
SLC22A12	-10.08	8	-1.95	0.0258	292	0.942	0.974	17637	0.99
TERF2	-10.07	8	-1.95	0.0259	293	0.942	0.974	17636	0.99
PABPN1L	-10.07	8	-1.95	0.0259	294	0.942	0.974	17635	0.99
KANSL2	-10.07	8	-1.95	0.0259	295	0.942	0.974	17634	0.99
PPP1R1C	-10.07	8	-1.94	0.0259	296	0.942	0.974	17633	0.99
CYB561A3	-10.06	8	-1.94	0.026	297	0.942	0.974	17632	0.99
TRIB1	-10.06	8	-1.94	0.026	298	0.942	0.974	17631	0.99
ANKRD44	-10.06	8	-1.94	0.026	299	0.942	0.974	17630	0.99
SUPT16H	-10.06	8	-1.94	0.0261	300	0.942	0.974	17629	0.99
STAM	-10.05	8	-1.94	0.0261	301	0.942	0.974	17628	0.99
C6orf58	-10.05	8	-1.94	0.0262	302	0.942	0.974	17627	0.99
ZFR	-10.05	8	-1.94	0.0262	303	0.942	0.974	17626	0.99
PYGO1	-10.04	8	-1.94	0.0263	304	0.942	0.974	17625	0.99
IBTK	-10.04	8	-1.94	0.0263	305	0.942	0.974	17624	0.99
MROH1	-10.04	8	-1.94	0.0263	306	0.942	0.974	17623	0.99
SPRED2	-10.04	8	-1.94	0.0264	307	0.942	0.974	17622	0.99
ABHD3	-10.04	8	-1.94	0.0264	308	0.942	0.974	17621	0.99
LPXN	-10.03	8	-1.94	0.0265	309	0.942	0.974	17620	0.99
PMFBP1	-10.03	8	-1.94	0.0265	310	0.942	0.974	17619	0.99
ASRGL1	-10.01	8	-1.93	0.0267	311	0.942	0.973	17618	0.99
CTNND1	-10.01	8	-1.93	0.0268	312	0.942	0.973	17617	0.99
C11orf49	-10	8	-1.93	0.0268	313	0.942	0.973	17616	0.99
UBASH3B	-10	8	-1.93	0.0269	314	0.942	0.973	17615	0.99
ARIH2	-9.99	8	-1.93	0.027	315	0.942	0.973	17614	0.99
KDM4C	-9.98	8	-1.93	0.0271	316	0.942	0.973	17613	0.99
ALOX12	-9.98	8	-1.92	0.0271	317	0.942	0.973	17612	0.99
MED20	-9.98	8	-1.92	0.0272	318	0.942	0.973	17611	0.99
ADM2	-9.97	8	-1.92	0.0272	319	0.942	0.973	17610	0.99
TCF23	-9.97	8	-1.92	0.0273	320	0.942	0.973	17609	0.99
ARHGDIG	-9.96	8	-1.92	0.0274	321	0.942	0.973	17608	0.99
MLLT10	-8.6	6	-1.91	0.0277	322	0.942	0.972	17607	0.99
BZW1	-9.93	8	-1.91	0.0278	323	0.942	0.972	17606	0.99
GAPDH	-8.6	6	-1.91	0.0279	324	0.942	0.972	17605	0.99
FAM184B	-9.91	8	-1.91	0.0281	325	0.942	0.972	17604	0.99
SUN2	-9.91	8	-1.91	0.0281	326	0.942	0.972	17603	0.99
LMCD1	-9.91	8	-1.91	0.0281	327	0.942	0.972	17602	0.99
ATXN10	-9.91	8	-1.91	0.0282	328	0.942	0.972	17601	0.99
CHCHD2	-9.91	8	-1.91	0.0282	329	0.942	0.972	17600	0.99
UNC80	-9.88	8	-1.9	0.0285	330	0.942	0.971	17599	0.99
C16orf91	-9.88	8	-1.9	0.0285	331	0.942	0.971	17598	0.99
TRAF7	-9.88	8	-1.9	0.0286	332	0.942	0.971	17597	0.99
PHF14	-9.87	8	-1.9	0.0286	333	0.942	0.971	17596	0.99
MROH2A	-9.86	8	-1.9	0.0288	334	0.942	0.971	17595	0.99
C4orf17	-9.86	8	-1.9	0.0289	335	0.942	0.971	17594	0.99
PCDHGB4	-9.85	8	-1.9	0.029	336	0.942	0.971	17593	0.99
RSPH3	-9.85	8	-1.9	0.029	337	0.942	0.971	17592	0.99
TEK	-9.83	8	-1.89	0.0292	338	0.942	0.971	17591	0.989
FAN1	-9.83	8	-1.89	0.0293	339	0.942	0.971	17590	0.989
NELFB	-8.51	6	-1.89	0.0294	340	0.942	0.971	17589	0.989
GPHA2	-9.81	8	-1.89	0.0295	341	0.942	0.971	17588	0.989
ELP4	-9.81	8	-1.89	0.0296	342	0.942	0.97	17587	0.989
OR13A1	-9.8	8	-1.89	0.0297	343	0.942	0.97	17586	0.989
MAZ	-9.8	8	-1.88	0.0297	344	0.942	0.97	17585	0.989
ARL13A	-9.8	8	-1.88	0.0298	345	0.942	0.97	17584	0.989
CYB5D1	-9.79	8	-1.88	0.0299	346	0.942	0.97	17583	0.989
ORAI1	-9.78	8	-1.88	0.03	347	0.942	0.97	17582	0.989
FAM230A	-9.77	8	-1.88	0.0302	348	0.942	0.97	17581	0.989
KCNB1	-9.76	8	-1.88	0.0303	349	0.942	0.97	17580	0.989
ARRDC1	-9.76	8	-1.88	0.0303	350	0.942	0.97	17579	0.989
DQX1	-9.76	8	-1.88	0.0303	351	0.942	0.97	17578	0.989
CLYBL	-9.76	8	-1.88	0.0303	352	0.942	0.97	17577	0.989
CTSW	-9.76	8	-1.88	0.0304	353	0.942	0.97	17576	0.989
AP001816.1	-9.76	8	-1.88	0.0304	354	0.942	0.97	17575	0.989
FAM181B	-9.75	8	-1.88	0.0304	355	0.942	0.97	17574	0.989
SYTL4	-9.74	8	-1.87	0.0306	356	0.942	0.969	17573	0.989
MAP1LC3B	-4.87	2	-1.87	0.0306	357	0.942	0.969	17572	0.989
PCDHGB6	-9.74	8	-1.87	0.0306	358	0.942	0.969	17571	0.989
TEX12	-8.41	6	-1.87	0.031	359	0.942	0.969	17570	0.989
HOXB6	-9.71	8	-1.87	0.031	360	0.942	0.969	17569	0.989
MAST4	-9.71	8	-1.86	0.0311	361	0.942	0.969	17568	0.989
ITIH4	-9.71	8	-1.86	0.0311	362	0.942	0.969	17567	0.989
CLIC4	-9.7	8	-1.86	0.0312	363	0.942	0.969	17566	0.989
VPS4B	-9.7	8	-1.86	0.0313	364	0.942	0.969	17565	0.989
TBX18	-9.67	8	-1.86	0.0318	365	0.942	0.968	17564	0.988
PSPC1	-9.66	8	-1.85	0.0318	366	0.942	0.968	17563	0.988
CCNJL	-9.66	8	-1.85	0.0319	367	0.942	0.968	17562	0.988
SNX18	-9.66	8	-1.85	0.0319	368	0.942	0.968	17561	0.988
SULT4A1	-9.65	8	-1.85	0.0319	369	0.942	0.968	17560	0.988
TCEA2	-9.65	8	-1.85	0.0319	370	0.942	0.968	17559	0.988
SLC4A1AP	-9.65	8	-1.85	0.032	371	0.942	0.968	17558	0.988
PRDM6	-9.64	8	-1.85	0.0321	372	0.942	0.968	17557	0.988
PRRC2B	-9.64	8	-1.85	0.0321	373	0.942	0.968	17556	0.988
ZFP64	-9.64	8	-1.85	0.0322	374	0.942	0.968	17555	0.988
SLC14A2	-9.64	8	-1.85	0.0322	375	0.942	0.968	17554	0.988
DUSP7	-9.64	8	-1.85	0.0322	376	0.942	0.968	17553	0.988
PNPLA3	-9.63	8	-1.85	0.0323	377	0.942	0.968	17552	0.988
FAM214A	-9.63	8	-1.85	0.0323	378	0.942	0.968	17551	0.988
REEP2	-9.63	8	-1.85	0.0323	379	0.942	0.968	17550	0.988
TMEM150A	-9.63	8	-1.85	0.0324	380	0.942	0.968	17549	0.988
TSC22D4	-9.61	8	-1.84	0.0326	381	0.942	0.967	17548	0.988
RFC1	-9.61	8	-1.84	0.0326	382	0.942	0.967	17547	0.988
TRAF4	-9.6	8	-1.84	0.0328	383	0.942	0.967	17546	0.988
TTYH2	-9.59	8	-1.84	0.033	384	0.942	0.967	17545	0.988
INTS5	-9.58	8	-1.84	0.0332	385	0.942	0.967	17544	0.988
G6PC3	-9.57	8	-1.83	0.0333	386	0.942	0.967	17543	0.988
NADK2	-9.57	8	-1.83	0.0333	387	0.942	0.967	17542	0.988
FAM134C	-9.57	8	-1.83	0.0333	388	0.942	0.967	17541	0.988
DNAJC21	-9.57	8	-1.83	0.0333	389	0.942	0.967	17540	0.988
POMGNT2	-9.57	8	-1.83	0.0334	390	0.942	0.967	17539	0.988
RMND5A	-9.57	8	-1.83	0.0334	391	0.942	0.967	17538	0.988
LHFPL3	-9.57	8	-1.83	0.0334	392	0.942	0.967	17537	0.988
MFSD2A	-9.56	8	-1.83	0.0334	393	0.942	0.967	17536	0.988
TTPA	-9.56	8	-1.83	0.0335	394	0.942	0.967	17535	0.988
BAG1	-9.56	8	-1.83	0.0335	395	0.942	0.966	17534	0.988
KDM6A	-8.28	6	-1.83	0.0335	396	0.942	0.966	17533	0.988
ACCSL	-9.55	8	-1.83	0.0336	397	0.942	0.966	17532	0.988
DYRK1A	-9.53	8	-1.83	0.0339	398	0.942	0.966	17531	0.988
TMEM126B	-9.53	8	-1.83	0.0339	399	0.942	0.966	17530	0.988
KCNH7	-9.53	8	-1.83	0.0339	400	0.942	0.966	17529	0.988
MICAL1	-9.53	8	-1.83	0.0339	401	0.942	0.966	17528	0.988
FAM172A	-9.53	8	-1.82	0.034	402	0.942	0.966	17527	0.988
SGSM1	-9.52	8	-1.82	0.0341	403	0.942	0.966	17526	0.988
KDSR	-9.52	8	-1.82	0.0341	404	0.942	0.966	17525	0.988
FDXR	-9.51	8	-1.82	0.0342	405	0.942	0.966	17524	0.988
ALOX5	-9.51	8	-1.82	0.0343	406	0.942	0.966	17523	0.988
ENHO	-9.51	8	-1.82	0.0343	407	0.942	0.966	17522	0.988
ANKRD42	-9.5	8	-1.82	0.0344	408	0.942	0.966	17521	0.988
FXR2	-9.5	8	-1.82	0.0344	409	0.942	0.966	17520	0.988
CPLX2	-9.5	8	-1.82	0.0345	410	0.942	0.966	17519	0.988
USP24	-9.49	8	-1.82	0.0347	411	0.942	0.965	17518	0.988
PCDHGA9	-9.48	8	-1.82	0.0347	412	0.942	0.965	17517	0.988
GPRC6A	-9.47	8	-1.81	0.035	413	0.942	0.965	17516	0.988
C16orf11	-9.46	8	-1.81	0.0351	414	0.942	0.965	17515	0.988
PMP22	-9.46	8	-1.81	0.0351	415	0.942	0.965	17514	0.988
ETFDH	-9.46	8	-1.81	0.0352	416	0.942	0.965	17513	0.988
RNF215	-9.45	8	-1.81	0.0353	417	0.942	0.965	17512	0.988
DUSP16	-9.44	8	-1.81	0.0354	418	0.942	0.965	17511	0.988
SERPINB3	-9.43	8	-1.8	0.0356	419	0.942	0.964	17510	0.987
TMEM31	-9.43	8	-1.8	0.0356	420	0.942	0.964	17509	0.987
UBOX5	-9.43	8	-1.8	0.0356	421	0.942	0.964	17508	0.987
KDM6B	-9.42	8	-1.8	0.0358	422	0.942	0.964	17507	0.987
AANAT	-9.41	8	-1.8	0.036	423	0.942	0.964	17506	0.987
CELF4	-9.41	8	-1.8	0.036	424	0.942	0.964	17505	0.987
FLRT2	-9.41	8	-1.8	0.036	425	0.942	0.964	17504	0.987
UBR5	-9.41	8	-1.8	0.036	426	0.942	0.964	17503	0.987
SLC30A5	-9.4	8	-1.8	0.0361	427	0.942	0.964	17502	0.987
TBC1D10B	-9.4	8	-1.8	0.0362	428	0.942	0.964	17501	0.987
OSBPL8	-9.4	8	-1.8	0.0362	429	0.942	0.964	17500	0.987
MEST	-9.39	8	-1.8	0.0363	430	0.942	0.964	17499	0.987
ARHGAP44	-9.39	8	-1.8	0.0363	431	0.942	0.964	17498	0.987
METAP2	-9.39	8	-1.79	0.0364	432	0.942	0.964	17497	0.987
HIST1H2AB	-8.13	6	-1.79	0.0365	433	0.942	0.964	17496	0.987
METAP1	-9.37	8	-1.79	0.0366	434	0.942	0.963	17495	0.987
GNRH2	-9.37	8	-1.79	0.0366	435	0.942	0.963	17494	0.987
C11orf85	-9.37	8	-1.79	0.0366	436	0.942	0.963	17493	0.987
ABHD6	-9.36	8	-1.79	0.0369	437	0.942	0.963	17492	0.987
SLC9A3	-9.35	8	-1.79	0.037	438	0.942	0.963	17491	0.987
SPINK1	-9.35	8	-1.79	0.037	439	0.942	0.963	17490	0.987
TEX37	-9.34	8	-1.78	0.0372	440	0.942	0.963	17489	0.987
TDRD6	-9.33	8	-1.78	0.0374	441	0.942	0.963	17488	0.987
NDNL2	-8.72	7	-1.78	0.0375	442	0.942	0.963	17487	0.987
HOXA7	-9.32	8	-1.78	0.0377	443	0.942	0.962	17486	0.987
RNF181	-9.32	8	-1.78	0.0377	444	0.942	0.962	17485	0.987
HHLA3	-9.32	8	-1.78	0.0377	445	0.942	0.962	17484	0.987
ZNF517	-9.31	8	-1.78	0.0377	446	0.942	0.962	17483	0.987
GLT1D1	-9.31	8	-1.78	0.0377	447	0.942	0.962	17482	0.987
ANO1	-9.31	8	-1.78	0.0377	448	0.942	0.962	17481	0.987
CES4A	-9.31	8	-1.78	0.0378	449	0.942	0.962	17480	0.987
KRT16	-9.31	8	-1.78	0.0378	450	0.942	0.962	17479	0.987
ADAT2	-8.06	6	-1.78	0.0378	451	0.942	0.962	17478	0.987
TMEM176A	-9.3	8	-1.78	0.0379	452	0.942	0.962	17477	0.987
LIPT1	-9.3	8	-1.78	0.0379	453	0.942	0.962	17476	0.987
DYNC2H1	-9.3	8	-1.77	0.038	454	0.942	0.962	17475	0.987
OTUD5	-9.29	8	-1.77	0.0381	455	0.942	0.962	17474	0.987
PIP4K2B	-9.29	8	-1.77	0.0381	456	0.942	0.962	17473	0.987
TANK	-9.28	8	-1.77	0.0383	457	0.942	0.962	17472	0.987
SYT17	-9.28	8	-1.77	0.0383	458	0.942	0.962	17471	0.987
KLRF1	-9.28	8	-1.77	0.0384	459	0.942	0.962	17470	0.987
CCDC6	-8.01	6	-1.76	0.0389	460	0.942	0.961	17469	0.986
RPS20	-4.62	2	-1.76	0.039	461	0.942	0.961	17468	0.986
C6	-9.24	8	-1.76	0.039	462	0.942	0.961	17467	0.986
C12orf5	-9.24	8	-1.76	0.0391	463	0.942	0.961	17466	0.986
MAP3K13	-9.24	8	-1.76	0.0391	464	0.942	0.961	17465	0.986
USP36	-9.24	8	-1.76	0.0391	465	0.942	0.961	17464	0.986
SV2C	-9.23	8	-1.76	0.0392	466	0.942	0.961	17463	0.986
OR4A5	-6.53	4	-1.76	0.0392	467	0.942	0.961	17462	0.986
UFL1	-9.22	8	-1.76	0.0393	468	0.942	0.961	17461	0.986
KMT2D	-9.22	8	-1.76	0.0394	469	0.942	0.961	17460	0.986
PCDHB1	-9.22	8	-1.76	0.0395	470	0.942	0.961	17459	0.986
OTP	-9.2	8	-1.75	0.0397	471	0.942	0.96	17458	0.986
MFHAS1	-9.2	8	-1.75	0.0398	472	0.942	0.96	17457	0.986
FAM101A	-9.19	8	-1.75	0.04	473	0.942	0.96	17456	0.986
RAPGEFL1	-9.18	8	-1.75	0.0401	474	0.942	0.96	17455	0.986
GC	-9.18	8	-1.75	0.0401	475	0.942	0.96	17454	0.986
DOT1L	-9.18	8	-1.75	0.0401	476	0.942	0.96	17453	0.986
HNF4A	-9.17	8	-1.75	0.0403	477	0.942	0.96	17452	0.986
BBS2	-9.17	8	-1.75	0.0404	478	0.942	0.96	17451	0.986
FH	-9.16	8	-1.74	0.0406	479	0.942	0.959	17450	0.986
VAT1	-9.15	8	-1.74	0.0407	480	0.942	0.959	17449	0.986
MICAL3	-9.15	8	-1.74	0.0408	481	0.942	0.959	17448	0.986
MBOAT2	-9.14	8	-1.74	0.041	482	0.942	0.959	17447	0.985
CFDP1	-9.14	8	-1.74	0.041	483	0.942	0.959	17446	0.985
MYO1H	-9.13	8	-1.74	0.0411	484	0.942	0.959	17445	0.985
APEX1	-9.13	8	-1.74	0.0412	485	0.942	0.959	17444	0.985
SOX21	-9.12	8	-1.74	0.0412	486	0.942	0.959	17443	0.985
TCAP	-9.12	8	-1.74	0.0413	487	0.942	0.959	17442	0.985
MUT	-9.12	8	-1.74	0.0413	488	0.942	0.959	17441	0.985
MYBL1	-9.11	8	-1.73	0.0414	489	0.942	0.959	17440	0.985
NUP153	-9.11	8	-1.73	0.0415	490	0.942	0.959	17439	0.985
HS3ST3A1	-9.11	8	-1.73	0.0415	491	0.942	0.958	17438	0.985
TMEM47	-9.11	8	-1.73	0.0415	492	0.942	0.958	17437	0.985
USP16	-9.11	8	-1.73	0.0416	493	0.942	0.958	17436	0.985
GTSE1	-9.11	8	-1.73	0.0416	494	0.942	0.958	17435	0.985
ING4	-9.11	8	-1.73	0.0416	495	0.942	0.958	17434	0.985
OR4D6	-9.1	8	-1.73	0.0417	496	0.942	0.958	17433	0.985
ECD	-9.1	8	-1.73	0.0418	497	0.942	0.958	17432	0.985
IFNK	-9.1	8	-1.73	0.0418	498	0.942	0.958	17431	0.985
PCSK1	-9.09	8	-1.73	0.0419	499	0.942	0.958	17430	0.985
USP42	-9.09	8	-1.73	0.0419	500	0.942	0.958	17429	0.985
PRSS21	-9.08	8	-1.73	0.0421	501	0.942	0.958	17428	0.985
FREM3	-9.08	8	-1.73	0.0422	502	0.942	0.958	17427	0.985
RSRC2	-9.07	8	-1.72	0.0424	503	0.942	0.958	17426	0.985
LIPT2	-9.06	8	-1.72	0.0424	504	0.942	0.958	17425	0.985
ARC	-9.06	8	-1.72	0.0425	505	0.942	0.958	17424	0.985
OR51F1	-9.05	8	-1.72	0.0426	506	0.942	0.957	17423	0.985
PRSS50	-9.05	8	-1.72	0.0427	507	0.942	0.957	17422	0.985
HOXB3	-9.05	8	-1.72	0.0428	508	0.942	0.957	17421	0.985
GBP7	-9.05	8	-1.72	0.0428	509	0.942	0.957	17420	0.985
NELFCD	-9.04	8	-1.72	0.0428	510	0.942	0.957	17419	0.985
RALB	-9.04	8	-1.72	0.043	511	0.942	0.957	17418	0.985
CDCA8	-9.03	8	-1.72	0.043	512	0.942	0.957	17417	0.985
C11orf71	-9.03	8	-1.72	0.0431	513	0.942	0.957	17416	0.985
RNF40	-9.03	8	-1.72	0.0431	514	0.942	0.957	17415	0.985
BIK	-9.03	8	-1.72	0.0432	515	0.942	0.957	17414	0.985
TTC19	-9.02	8	-1.71	0.0432	516	0.942	0.957	17413	0.985
ST3GAL6	-9.02	8	-1.71	0.0433	517	0.942	0.957	17412	0.985
MRPL36	-9.02	8	-1.71	0.0433	518	0.942	0.957	17411	0.985
HDHD2	-9.02	8	-1.71	0.0433	519	0.942	0.957	17410	0.985
COPS6	-9.02	8	-1.71	0.0434	520	0.942	0.957	17409	0.985
EFNA5	-9.01	8	-1.71	0.0434	521	0.942	0.957	17408	0.985
INSIG2	-9.01	8	-1.71	0.0435	522	0.942	0.957	17407	0.985
CMTR2	-9.01	8	-1.71	0.0435	523	0.942	0.957	17406	0.985
CDC6	-8.43	7	-1.71	0.0435	524	0.942	0.957	17405	0.985
COQ9	-9.01	8	-1.71	0.0435	525	0.942	0.956	17404	0.985
CRIP3	-9.01	8	-1.71	0.0436	526	0.942	0.956	17403	0.985
BDH1	-9.01	8	-1.71	0.0436	527	0.942	0.956	17402	0.985
TP73	-9	8	-1.71	0.0436	528	0.942	0.956	17401	0.985
DUSP5	-9	8	-1.71	0.0436	529	0.942	0.956	17400	0.985
ATP7B	-9	8	-1.71	0.0438	530	0.942	0.956	17399	0.985
ADNP	-9	8	-1.71	0.0438	531	0.942	0.956	17398	0.985
WDR90	-8.99	8	-1.71	0.0439	532	0.942	0.956	17397	0.985
ZC3H12A	-8.99	8	-1.71	0.0439	533	0.942	0.956	17396	0.985
NICN1	-8.99	8	-1.71	0.0439	534	0.942	0.956	17395	0.985
SH3BP4	-8.98	8	-1.7	0.0442	535	0.942	0.956	17394	0.985
CNOT7	-8.98	8	-1.7	0.0442	536	0.942	0.956	17393	0.985
NUP155	-8.97	8	-1.7	0.0443	537	0.942	0.956	17392	0.985
MAVS	-8.96	8	-1.7	0.0446	538	0.942	0.955	17391	0.985
GCNT7	-8.95	8	-1.7	0.0448	539	0.942	0.955	17390	0.985
DNAH9	-8.95	8	-1.7	0.0448	540	0.942	0.955	17389	0.985
HVCN1	-8.95	8	-1.7	0.0448	541	0.942	0.955	17388	0.985
CYB5B	-8.95	8	-1.7	0.0448	542	0.942	0.955	17387	0.985
PPIG	-8.94	8	-1.7	0.0449	543	0.942	0.955	17386	0.985
FAM83G	-8.94	8	-1.7	0.0449	544	0.942	0.955	17385	0.985
CLIC6	-8.94	8	-1.7	0.0449	545	0.942	0.955	17384	0.985
UBE2V1	-4.47	2	-1.7	0.045	546	0.942	0.955	17383	0.985
SNAP29	-8.94	8	-1.7	0.045	547	0.942	0.955	17382	0.985
BAIAP2	-8.93	8	-1.69	0.0451	548	0.942	0.955	17381	0.985
PROKR2	-8.93	8	-1.69	0.0452	549	0.942	0.955	17380	0.985
ABI3	-8.93	8	-1.69	0.0453	550	0.942	0.955	17379	0.985
IL4R	-8.92	8	-1.69	0.0454	551	0.942	0.955	17378	0.985
TMEM127	-8.92	8	-1.69	0.0454	552	0.942	0.955	17377	0.985
DMTF1	-8.91	8	-1.69	0.0455	553	0.942	0.955	17376	0.985
NAT2	-8.91	8	-1.69	0.0455	554	0.942	0.954	17375	0.985
RRP1	-8.91	8	-1.69	0.0455	555	0.942	0.954	17374	0.985
C3orf62	-8.91	8	-1.69	0.0455	556	0.942	0.954	17373	0.985
HOXC10	-8.91	8	-1.69	0.0455	557	0.942	0.954	17372	0.985
ROCK2	-8.91	8	-1.69	0.0456	558	0.942	0.954	17371	0.985
NARG2	-8.91	8	-1.69	0.0456	559	0.942	0.954	17370	0.985
TMEM99	-8.91	8	-1.69	0.0456	560	0.942	0.954	17369	0.985
ACADVL	-8.9	8	-1.69	0.0458	561	0.942	0.954	17368	0.985
MUSK	-8.89	8	-1.69	0.0459	562	0.942	0.954	17367	0.985
GPR179	-8.89	8	-1.69	0.046	563	0.942	0.954	17366	0.985
SMKR1	-8.88	8	-1.68	0.0461	564	0.942	0.954	17365	0.985
PTPN3	-8.88	8	-1.68	0.0462	565	0.942	0.954	17364	0.985
ADD2	-8.88	8	-1.68	0.0463	566	0.942	0.954	17363	0.985
TRPV3	-8.87	8	-1.68	0.0464	567	0.942	0.954	17362	0.985
CNR2	-8.87	8	-1.68	0.0464	568	0.942	0.954	17361	0.985
TRIB2	-8.87	8	-1.68	0.0465	569	0.942	0.954	17360	0.985
ABCA9	-8.87	8	-1.68	0.0465	570	0.942	0.954	17359	0.985
TBC1D22A	-8.87	8	-1.68	0.0465	571	0.942	0.953	17358	0.985
LMNB1	-8.87	8	-1.68	0.0465	572	0.942	0.953	17357	0.985
WDR82	-8.29	7	-1.68	0.0467	573	0.942	0.953	17356	0.985
IFI35	-8.86	8	-1.68	0.0467	574	0.942	0.953	17355	0.985
ZDHHC11B	-4.43	2	-1.68	0.0467	575	0.942	0.953	17354	0.985
UGT3A1	-8.85	8	-1.68	0.0469	576	0.942	0.953	17353	0.985
APEX2	-8.84	8	-1.67	0.0471	577	0.942	0.953	17352	0.985
EMID1	-8.84	8	-1.67	0.0471	578	0.942	0.953	17351	0.985
JAKMIP3	-8.84	8	-1.67	0.0472	579	0.942	0.953	17350	0.985
GAL3ST1	-8.83	8	-1.67	0.0473	580	0.942	0.953	17349	0.985
MLC1	-8.83	8	-1.67	0.0473	581	0.942	0.953	17348	0.985
PDE1C	-8.83	8	-1.67	0.0474	582	0.942	0.953	17347	0.985
GRK6	-8.83	8	-1.67	0.0474	583	0.942	0.953	17346	0.985
TUB	-8.82	8	-1.67	0.0475	584	0.942	0.953	17345	0.985
PPME1	-8.82	8	-1.67	0.0475	585	0.942	0.952	17344	0.985
FAM57B	-8.82	8	-1.67	0.0476	586	0.942	0.952	17343	0.985
SRCRB4D	-8.81	8	-1.67	0.0477	587	0.942	0.952	17342	0.984
GRPEL2	-8.81	8	-1.67	0.0478	588	0.942	0.952	17341	0.984
TAPBPL	-8.8	8	-1.67	0.0479	589	0.942	0.952	17340	0.984
C11orf48	-8.8	8	-1.66	0.048	590	0.942	0.952	17339	0.984
C4orf40	-8.8	8	-1.66	0.048	591	0.942	0.952	17338	0.984
RELT	-8.8	8	-1.66	0.048	592	0.942	0.952	17337	0.984
SPTLC1	-8.79	8	-1.66	0.0483	593	0.942	0.952	17336	0.984
FSIP2	-8.78	8	-1.66	0.0484	594	0.942	0.952	17335	0.984
FAM43A	-8.78	8	-1.66	0.0484	595	0.942	0.952	17334	0.984
ROBO4	-8.77	8	-1.66	0.0485	596	0.942	0.951	17333	0.984
SLFN14	-8.77	8	-1.66	0.0485	597	0.942	0.951	17332	0.984
COL9A2	-8.77	8	-1.66	0.0486	598	0.942	0.951	17331	0.984
RNF123	-8.77	8	-1.66	0.0487	599	0.942	0.951	17330	0.984
SNRPA1	-7.59	6	-1.66	0.0488	600	0.942	0.951	17329	0.984
SGCG	-8.75	8	-1.65	0.0491	601	0.942	0.951	17328	0.984
MRGPRG	-8.75	8	-1.65	0.0492	602	0.942	0.951	17327	0.984
AMMECR1	-8.73	8	-1.65	0.0495	603	0.942	0.95	17326	0.983
GRIN2C	-8.72	8	-1.65	0.0497	604	0.942	0.95	17325	0.983
PAGE4	-8.72	8	-1.65	0.0497	605	0.942	0.95	17324	0.983
POPDC2	-8.72	8	-1.65	0.0497	606	0.942	0.95	17323	0.983
TRIM56	-8.72	8	-1.65	0.0497	607	0.942	0.95	17322	0.983
PRDM10	-8.72	8	-1.65	0.0498	608	0.942	0.95	17321	0.983
KRT27	-8.71	8	-1.65	0.0499	609	0.942	0.95	17320	0.983
ADRA1D	-8.71	8	-1.65	0.0499	610	0.942	0.95	17319	0.983
NEMF	-8.71	8	-1.65	0.0499	611	0.942	0.95	17318	0.983
TSNAXIP1	-8.71	8	-1.65	0.05	612	0.942	0.95	17317	0.983
NHLRC1	-8.7	8	-1.64	0.0501	613	0.942	0.95	17316	0.983
VWC2	-8.7	8	-1.64	0.0502	614	0.942	0.95	17315	0.983
COL20A1	-8.7	8	-1.64	0.0503	615	0.942	0.95	17314	0.983
SPTLC2	-8.69	8	-1.64	0.0504	616	0.942	0.95	17313	0.983
ENC1	-8.69	8	-1.64	0.0504	617	0.942	0.95	17312	0.983
LDB2	-8.69	8	-1.64	0.0504	618	0.942	0.95	17311	0.983
BEX2	-6.14	4	-1.64	0.0505	619	0.942	0.95	17310	0.983
VGF	-8.69	8	-1.64	0.0505	620	0.942	0.95	17309	0.983
SLC25A5	-7.52	6	-1.64	0.0505	621	0.942	0.949	17308	0.983
C5orf63	-8.68	8	-1.64	0.0506	622	0.942	0.949	17307	0.983
SHBG	-8.68	8	-1.64	0.0507	623	0.942	0.949	17306	0.983
PIH1D3	-8.68	8	-1.64	0.0507	624	0.942	0.949	17305	0.983
ASCL2	-8.67	8	-1.64	0.0508	625	0.942	0.949	17304	0.983
TSC22D2	-8.67	8	-1.64	0.0508	626	0.942	0.949	17303	0.983
SRP19	-6.86	5	-1.64	0.0508	627	0.942	0.949	17302	0.983
TMEM176B	-8.67	8	-1.64	0.0509	628	0.942	0.949	17301	0.983
TMF1	-8.67	8	-1.64	0.0509	629	0.942	0.949	17300	0.983
ABCF2	-8.67	8	-1.64	0.0509	630	0.942	0.949	17299	0.983
MLPH	-8.66	8	-1.63	0.051	631	0.942	0.949	17298	0.983
CRYL1	-8.66	8	-1.63	0.051	632	0.942	0.949	17297	0.983
FAM169A	-8.65	8	-1.63	0.0512	633	0.942	0.949	17296	0.983
TMEM116	-8.65	8	-1.63	0.0513	634	0.942	0.949	17295	0.983
OTOF	-8.65	8	-1.63	0.0514	635	0.942	0.949	17294	0.983
GLIPR1L2	-8.64	8	-1.63	0.0515	636	0.942	0.949	17293	0.983
HDAC6	-8.64	8	-1.63	0.0515	637	0.942	0.948	17292	0.983
ANKRD2	-8.63	8	-1.63	0.0517	638	0.942	0.948	17291	0.983
USP7	-8.63	8	-1.63	0.0519	639	0.942	0.948	17290	0.983
TFE3	-8.62	8	-1.63	0.052	640	0.942	0.948	17289	0.983
C3orf27	-8.62	8	-1.63	0.052	641	0.942	0.948	17288	0.983
DCAKD	-8.62	8	-1.62	0.0521	642	0.942	0.948	17287	0.983
PITX1	-8.62	8	-1.62	0.0521	643	0.942	0.948	17286	0.983
SENP7	-8.62	8	-1.62	0.0522	644	0.942	0.948	17285	0.983
COG4	-8.61	8	-1.62	0.0523	645	0.942	0.948	17284	0.983
RBL2	-8.6	8	-1.62	0.0524	646	0.942	0.948	17283	0.983
C11orf31	-8.6	8	-1.62	0.0524	647	0.942	0.948	17282	0.983
MMP8	-8.6	8	-1.62	0.0525	648	0.942	0.947	17281	0.983
CDC20B	-8.6	8	-1.62	0.0525	649	0.942	0.947	17280	0.983
RBM23	-8.6	8	-1.62	0.0525	650	0.942	0.947	17279	0.983
HCFC1R1	-8.6	8	-1.62	0.0526	651	0.942	0.947	17278	0.983
RREB1	-8.59	8	-1.62	0.0527	652	0.942	0.947	17277	0.983
CAPSL	-8.58	8	-1.62	0.053	653	0.942	0.947	17276	0.983
PCDH20	-8.58	8	-1.62	0.053	654	0.942	0.947	17275	0.983
PTRF	-8.57	8	-1.62	0.0531	655	0.942	0.947	17274	0.983
ZHX1	-8.57	8	-1.61	0.0532	656	0.942	0.947	17273	0.983
MSH3	-8.56	8	-1.61	0.0534	657	0.942	0.947	17272	0.983
HGS	-8.56	8	-1.61	0.0536	658	0.942	0.946	17271	0.982
DGKI	-8.55	8	-1.61	0.0536	659	0.942	0.946	17270	0.982
CPSF4L	-8.54	8	-1.61	0.0539	660	0.942	0.946	17269	0.982
IMPAD1	-8.54	8	-1.61	0.0539	661	0.942	0.946	17268	0.982
RGS9	-8.54	8	-1.61	0.054	662	0.942	0.946	17267	0.982
MAN1A1	-8.54	8	-1.61	0.054	663	0.942	0.946	17266	0.982
APBB3	-8.54	8	-1.61	0.054	664	0.942	0.946	17265	0.982
TEX26	-8.54	8	-1.61	0.0541	665	0.942	0.946	17264	0.982
RPL19	-7.39	6	-1.61	0.0541	666	0.942	0.946	17263	0.982
NABP2	-8.53	8	-1.61	0.0542	667	0.942	0.946	17262	0.982
APBB1	-8.53	8	-1.6	0.0542	668	0.942	0.946	17261	0.982
CNTNAP4	-8.52	8	-1.6	0.0543	669	0.942	0.946	17260	0.982
MAP1A	-8.51	8	-1.6	0.0546	670	0.942	0.945	17259	0.982
N4BP1	-8.51	8	-1.6	0.0547	671	0.942	0.945	17258	0.982
MARCO	-8.51	8	-1.6	0.0547	672	0.942	0.945	17257	0.982
LTN1	-8.51	8	-1.6	0.0547	673	0.942	0.945	17256	0.982
TMEM229A	-8.51	8	-1.6	0.0547	674	0.942	0.945	17255	0.982
NYAP2	-8.5	8	-1.6	0.0548	675	0.942	0.945	17254	0.982
CYB561D2	-8.5	8	-1.6	0.0549	676	0.942	0.945	17253	0.982
TMEM158	-8.5	8	-1.6	0.0549	677	0.942	0.945	17252	0.982
FSD1L	-8.5	8	-1.6	0.055	678	0.942	0.945	17251	0.982
UBE2QL1	-8.5	8	-1.6	0.055	679	0.942	0.945	17250	0.982
C1QTNF2	-8.5	8	-1.6	0.055	680	0.942	0.945	17249	0.982
CCL1	-8.49	8	-1.6	0.055	681	0.942	0.945	17248	0.982
C9orf3	-8.49	8	-1.6	0.0551	682	0.942	0.945	17247	0.982
LPO	-7.36	6	-1.6	0.0551	683	0.942	0.945	17246	0.982
NRM	-8.49	8	-1.6	0.0552	684	0.942	0.945	17245	0.982
RAP2A	-8.48	8	-1.6	0.0553	685	0.942	0.945	17244	0.982
H2AFV	-8.48	8	-1.6	0.0553	686	0.942	0.945	17243	0.982
LRRC70	-8.48	8	-1.59	0.0554	687	0.942	0.945	17242	0.982
PPP2R5B	-8.48	8	-1.59	0.0555	688	0.942	0.945	17241	0.982
EEPD1	-8.47	8	-1.59	0.0557	689	0.942	0.944	17240	0.982
GCM2	-8.47	8	-1.59	0.0557	690	0.942	0.944	17239	0.982
SLC22A31	-8.46	8	-1.59	0.0558	691	0.942	0.944	17238	0.982
PLAA	-8.46	8	-1.59	0.0558	692	0.942	0.944	17237	0.982
NPTX2	-8.46	8	-1.59	0.0558	693	0.942	0.944	17236	0.982
NACA	-8.46	8	-1.59	0.0559	694	0.942	0.944	17235	0.982
KCTD2	-8.46	8	-1.59	0.056	695	0.942	0.944	17234	0.982
ZNF672	-8.46	8	-1.59	0.056	696	0.942	0.944	17233	0.982
CACNA1G	-8.45	8	-1.59	0.056	697	0.942	0.944	17232	0.982
PCDHA3	-8.45	8	-1.59	0.0561	698	0.942	0.944	17231	0.982
OPRK1	-8.45	8	-1.59	0.0561	699	0.942	0.944	17230	0.982
EP300	-8.45	8	-1.59	0.0561	700	0.942	0.944	17229	0.982
ZNF750	-8.45	8	-1.59	0.0562	701	0.942	0.944	17228	0.982
CCDC132	-8.45	8	-1.59	0.0562	702	0.942	0.944	17227	0.982
RTFDC1	-7.31	6	-1.59	0.0563	703	0.942	0.944	17226	0.982
MTSS1	-8.44	8	-1.59	0.0565	704	0.942	0.944	17225	0.982
AGFG2	-8.44	8	-1.59	0.0565	705	0.942	0.944	17224	0.982
PCDHGA4	-8.43	8	-1.58	0.0566	706	0.942	0.943	17223	0.982
UBL3	-8.43	8	-1.58	0.0566	707	0.942	0.943	17222	0.982
TAGLN	-8.43	8	-1.58	0.0566	708	0.942	0.943	17221	0.982
PLA2G2E	-8.43	8	-1.58	0.0566	709	0.942	0.943	17220	0.982
ITGB4	-8.42	8	-1.58	0.0568	710	0.942	0.943	17219	0.982
TEAD4	-8.42	8	-1.58	0.057	711	0.942	0.943	17218	0.982
DPH2	-8.41	8	-1.58	0.0572	712	0.942	0.943	17217	0.982
PELI3	-8.4	8	-1.58	0.0573	713	0.942	0.943	17216	0.982
HNRNPH1	-8.4	8	-1.58	0.0573	714	0.942	0.943	17215	0.982
SZRD1	-8.4	8	-1.58	0.0573	715	0.942	0.943	17214	0.982
CSF3	-8.4	8	-1.58	0.0573	716	0.942	0.943	17213	0.982
NEURL	-8.39	8	-1.58	0.0575	717	0.942	0.942	17212	0.982
SOD3	-8.39	8	-1.58	0.0576	718	0.942	0.942	17211	0.982
PYY	-8.39	8	-1.57	0.0577	719	0.942	0.942	17210	0.982
S100A4	-8.39	8	-1.57	0.0578	720	0.942	0.942	17209	0.982
APOOL	-8.38	8	-1.57	0.0578	721	0.942	0.942	17208	0.982
ZNF75A	-8.38	8	-1.57	0.0578	722	0.942	0.942	17207	0.982
CXorf24	-8.38	8	-1.57	0.0578	723	0.942	0.942	17206	0.982
MAK16	-8.38	8	-1.57	0.058	724	0.942	0.942	17205	0.982
SNRK	-8.38	8	-1.57	0.058	725	0.942	0.942	17204	0.982
CA10	-8.37	8	-1.57	0.0581	726	0.942	0.942	17203	0.982
EPB41L4B	-8.37	8	-1.57	0.0582	727	0.942	0.942	17202	0.982
OR9Q2	-8.37	8	-1.57	0.0582	728	0.942	0.942	17201	0.982
AKAP1	-8.37	8	-1.57	0.0583	729	0.942	0.942	17200	0.982
DIP2B	-8.37	8	-1.57	0.0583	730	0.942	0.942	17199	0.982
MAB21L2	-8.36	8	-1.57	0.0583	731	0.942	0.942	17198	0.982
ACAD11	-8.36	8	-1.57	0.0583	732	0.942	0.942	17197	0.982
ROCK1	-8.36	8	-1.57	0.0583	733	0.942	0.942	17196	0.982
PACSIN1	-8.36	8	-1.57	0.0584	734	0.942	0.942	17195	0.982
HAP1	-8.36	8	-1.57	0.0584	735	0.942	0.942	17194	0.982
ACSL4	-8.36	8	-1.57	0.0584	736	0.942	0.942	17193	0.982
NFE2L1	-8.35	8	-1.56	0.0588	737	0.942	0.941	17192	0.981
CHRM4	-8.34	8	-1.56	0.0588	738	0.942	0.941	17191	0.981
ZNFX1	-8.34	8	-1.56	0.0588	739	0.942	0.941	17190	0.981
GYLTL1B	-8.34	8	-1.56	0.059	740	0.942	0.941	17189	0.981
KRT34	-8.33	8	-1.56	0.0591	741	0.942	0.941	17188	0.981
GGACT	-8.33	8	-1.56	0.0591	742	0.942	0.941	17187	0.981
LEAP2	-8.33	8	-1.56	0.0592	743	0.942	0.941	17186	0.981
CLK1	-8.33	8	-1.56	0.0592	744	0.942	0.941	17185	0.981
HIST1H1B	-8.33	8	-1.56	0.0593	745	0.942	0.941	17184	0.981
RAI1	-8.33	8	-1.56	0.0593	746	0.942	0.941	17183	0.981
UBQLNL	-8.32	8	-1.56	0.0595	747	0.942	0.941	17182	0.981
NTN1	-8.32	8	-1.56	0.0595	748	0.942	0.94	17181	0.981
NHP2	-6.57	5	-1.56	0.0596	749	0.942	0.94	17180	0.981
FGB	-8.31	8	-1.56	0.0596	750	0.942	0.94	17179	0.981
ATP9B	-8.31	8	-1.56	0.0597	751	0.942	0.94	17178	0.981
CARD6	-8.31	8	-1.56	0.0598	752	0.942	0.94	17177	0.981
MCM7	-8.31	8	-1.56	0.0598	753	0.942	0.94	17176	0.981
OR52I1	-5.87	4	-1.56	0.0599	754	0.942	0.94	17175	0.981
PPP1R21	-8.3	8	-1.56	0.0599	755	0.942	0.94	17174	0.981
R3HDM1	-8.3	8	-1.55	0.0601	756	0.942	0.94	17173	0.981
BAHD1	-8.29	8	-1.55	0.0602	757	0.942	0.94	17172	0.981
DNAH10OS	-8.29	8	-1.55	0.0603	758	0.942	0.94	17171	0.981
luciferase	-20.3	48	-1.55	0.0603	759	0.942	0.94	17170	0.981
CCNI2	-8.28	8	-1.55	0.0604	760	0.942	0.94	17169	0.981
XAB2	-6.55	5	-1.55	0.0605	761	0.942	0.939	17168	0.981
TDRD5	-8.28	8	-1.55	0.0606	762	0.942	0.939	17167	0.981
KRT37	-8.27	8	-1.55	0.0608	763	0.942	0.939	17166	0.981
POU3F3	-8.27	8	-1.55	0.0608	764	0.942	0.939	17165	0.981
EXOC3L1	-8.27	8	-1.55	0.0608	765	0.942	0.939	17164	0.981
WSCD2	-8.26	8	-1.55	0.061	766	0.942	0.939	17163	0.981
FNBP4	-8.26	8	-1.55	0.0611	767	0.942	0.939	17162	0.981
NUP210	-8.25	8	-1.54	0.0612	768	0.942	0.939	17161	0.981
CNP	-8.25	8	-1.54	0.0613	769	0.942	0.939	17160	0.981
PCYT1A	-8.25	8	-1.54	0.0613	770	0.942	0.939	17159	0.981
SOX18	-8.25	8	-1.54	0.0614	771	0.942	0.939	17158	0.981
TRAF3IP2	-8.24	8	-1.54	0.0615	772	0.942	0.938	17157	0.981
UBQLN2	-8.24	8	-1.54	0.0617	773	0.942	0.938	17156	0.981
HSD17B4	-8.23	8	-1.54	0.0618	774	0.942	0.938	17155	0.98
PCDHGA6	-8.23	8	-1.54	0.0619	775	0.942	0.938	17154	0.98
CCS	-8.23	8	-1.54	0.0619	776	0.942	0.938	17153	0.98
TP53I3	-8.23	8	-1.54	0.062	777	0.942	0.938	17152	0.98
NUDT9	-8.22	8	-1.54	0.0621	778	0.942	0.938	17151	0.98
SUFU	-8.22	8	-1.54	0.0621	779	0.942	0.938	17150	0.98
THRAP3	-8.22	8	-1.54	0.0622	780	0.942	0.938	17149	0.98
OXGR1	-8.22	8	-1.54	0.0622	781	0.942	0.938	17148	0.98
WDFY4	-8.21	8	-1.54	0.0624	782	0.942	0.938	17147	0.98
FGFBP1	-8.21	8	-1.53	0.0625	783	0.942	0.938	17146	0.98
SLC7A3	-8.2	8	-1.53	0.0625	784	0.942	0.937	17145	0.98
ZPBP2	-8.2	8	-1.53	0.0627	785	0.942	0.937	17144	0.98
CAB39	-8.2	8	-1.53	0.0627	786	0.942	0.937	17143	0.98
LYPD2	-8.19	8	-1.53	0.0629	787	0.942	0.937	17142	0.98
HRAS	-8.19	8	-1.53	0.0629	788	0.942	0.937	17141	0.98
MTNR1B	-8.19	8	-1.53	0.063	789	0.942	0.937	17140	0.98
U2AF2	-6.47	5	-1.53	0.0631	790	0.942	0.937	17139	0.98
TMEM88	-8.18	8	-1.53	0.0631	791	0.942	0.937	17138	0.98
SPINK7	-8.18	8	-1.53	0.0632	792	0.942	0.937	17137	0.98
MYL12B	-4.09	2	-1.53	0.0632	793	0.942	0.937	17136	0.98
PDCD6	-8.18	8	-1.53	0.0633	794	0.942	0.937	17135	0.98
SLC16A12	-8.17	8	-1.53	0.0634	795	0.942	0.937	17134	0.98
PHEX	-8.16	8	-1.53	0.0636	796	0.942	0.936	17133	0.98
RBM14	-8.16	8	-1.52	0.0637	797	0.942	0.936	17132	0.98
MYH7B	-8.16	8	-1.52	0.0637	798	0.942	0.936	17131	0.98
WFDC10B	-5.77	4	-1.52	0.0638	799	0.942	0.936	17130	0.98
ARSI	-8.16	8	-1.52	0.0638	800	0.942	0.936	17129	0.98
TMEM50A	-8.16	8	-1.52	0.0638	801	0.942	0.936	17128	0.98
TRPM7	-8.15	8	-1.52	0.064	802	0.942	0.936	17127	0.98
SNX32	-8.15	8	-1.52	0.064	803	0.942	0.936	17126	0.98
ID4	-8.15	8	-1.52	0.064	804	0.942	0.936	17125	0.98
ZC3H8	-8.15	8	-1.52	0.064	805	0.942	0.936	17124	0.98
RAMP2	-8.15	8	-1.52	0.064	806	0.942	0.936	17123	0.98
GABRA4	-8.15	8	-1.52	0.0641	807	0.942	0.936	17122	0.98
C17orf51	-8.14	8	-1.52	0.0643	808	0.942	0.936	17121	0.98
DHODH	-8.14	8	-1.52	0.0643	809	0.942	0.936	17120	0.98
ZNRF1	-7.05	6	-1.52	0.0644	810	0.942	0.936	17119	0.98
ITGAE	-8.14	8	-1.52	0.0644	811	0.942	0.936	17118	0.98
COL21A1	-8.13	8	-1.52	0.0644	812	0.942	0.936	17117	0.98
RUNDC3B	-8.13	8	-1.52	0.0646	813	0.942	0.935	17116	0.98
ZNF516	-8.13	8	-1.52	0.0646	814	0.942	0.935	17115	0.98
DDRGK1	-8.13	8	-1.52	0.0647	815	0.942	0.935	17114	0.98
CTU2	-8.12	8	-1.52	0.0648	816	0.942	0.935	17113	0.98
TP63	-8.12	8	-1.52	0.0649	817	0.942	0.935	17112	0.98
TRIM7	-8.11	8	-1.51	0.065	818	0.942	0.935	17111	0.98
TLR1	-8.11	8	-1.51	0.0651	819	0.942	0.935	17110	0.98
UEVLD	-8.11	8	-1.51	0.0651	820	0.942	0.935	17109	0.98
MFAP3L	-8.11	8	-1.51	0.0651	821	0.942	0.935	17108	0.98
MAEA	-8.11	8	-1.51	0.0651	822	0.942	0.935	17107	0.98
TAS2R42	-8.1	8	-1.51	0.0653	823	0.942	0.935	17106	0.98
OR5B21	-8.1	8	-1.51	0.0654	824	0.942	0.935	17105	0.98
STARD3NL	-8.1	8	-1.51	0.0654	825	0.942	0.935	17104	0.98
RLIM	-8.1	8	-1.51	0.0654	826	0.942	0.935	17103	0.98
LZTS3	-8.1	8	-1.51	0.0654	827	0.942	0.935	17102	0.98
HAUS1	-7.01	6	-1.51	0.0654	828	0.942	0.935	17101	0.98
UCMA	-8.1	8	-1.51	0.0654	829	0.942	0.935	17100	0.98
PRTFDC1	-8.1	8	-1.51	0.0655	830	0.942	0.935	17099	0.98
CDKN1C	-8.1	8	-1.51	0.0655	831	0.942	0.935	17098	0.98
MGME1	-8.1	8	-1.51	0.0655	832	0.942	0.934	17097	0.98
PPP2R3A	-8.09	8	-1.51	0.0656	833	0.942	0.934	17096	0.98
MERTK	-8.09	8	-1.51	0.0656	834	0.942	0.934	17095	0.98
SLC26A7	-8.09	8	-1.51	0.0657	835	0.942	0.934	17094	0.98
DIAPH3	-8.08	8	-1.51	0.0659	836	0.942	0.934	17093	0.98
TMEM101	-8.08	8	-1.51	0.066	837	0.942	0.934	17092	0.98
PPARD	-8.08	8	-1.51	0.0661	838	0.942	0.934	17091	0.98
GABARAPL1	-8.07	8	-1.5	0.0662	839	0.942	0.934	17090	0.98
LGALS2	-8.07	8	-1.5	0.0662	840	0.942	0.934	17089	0.98
MEF2C	-8.07	8	-1.5	0.0663	841	0.942	0.934	17088	0.98
MMP15	-8.06	8	-1.5	0.0665	842	0.942	0.934	17087	0.979
RWDD3	-8.06	8	-1.5	0.0665	843	0.942	0.934	17086	0.979
MSANTD4	-8.06	8	-1.5	0.0665	844	0.942	0.933	17085	0.979
CCDC43	-8.06	8	-1.5	0.0665	845	0.942	0.933	17084	0.979
PGRMC1	-8.06	8	-1.5	0.0666	846	0.942	0.933	17083	0.979
AKR1C3	-8.06	8	-1.5	0.0667	847	0.942	0.933	17082	0.979
TP53INP1	-8.05	8	-1.5	0.0667	848	0.942	0.933	17081	0.979
CHM	-8.05	8	-1.5	0.0667	849	0.942	0.933	17080	0.979
HDHD3	-8.05	8	-1.5	0.0668	850	0.942	0.933	17079	0.979
C2orf53	-8.05	8	-1.5	0.0668	851	0.942	0.933	17078	0.979
PCIF1	-8.05	8	-1.5	0.0668	852	0.942	0.933	17077	0.979
ADAT1	-8.05	8	-1.5	0.0668	853	0.942	0.933	17076	0.979
DMRT1	-8.05	8	-1.5	0.0668	854	0.942	0.933	17075	0.979
OR51E1	-8.04	8	-1.5	0.067	855	0.942	0.933	17074	0.979
OTOL1	-8.04	8	-1.5	0.0671	856	0.942	0.933	17073	0.979
ARFGEF1	-8.04	8	-1.5	0.0671	857	0.942	0.933	17072	0.979
FZD2	-8.04	8	-1.5	0.0672	858	0.942	0.933	17071	0.979
IL37	-8.04	8	-1.5	0.0672	859	0.942	0.933	17070	0.979
CPEB2	-8.03	8	-1.5	0.0673	860	0.942	0.933	17069	0.979
DHX58	-8.03	8	-1.5	0.0673	861	0.942	0.933	17068	0.979
RPL3	-7.51	7	-1.5	0.0674	862	0.942	0.933	17067	0.979
OR4C3	-8.03	8	-1.5	0.0674	863	0.942	0.933	17066	0.979
TCTN3	-8.02	8	-1.49	0.0676	864	0.942	0.932	17065	0.979
CREBBP	-8.02	8	-1.49	0.0677	865	0.942	0.932	17064	0.979
COPS3	-8.02	8	-1.49	0.0677	866	0.942	0.932	17063	0.979
CTLA4	-8.02	8	-1.49	0.0677	867	0.942	0.932	17062	0.979
DHX38	-8.02	8	-1.49	0.0678	868	0.942	0.932	17061	0.979
COL4A3BP	-8.02	8	-1.49	0.0678	869	0.942	0.932	17060	0.979
C11orf54	-8.01	8	-1.49	0.0678	870	0.942	0.932	17059	0.979
GFOD2	-8.01	8	-1.49	0.0679	871	0.942	0.932	17058	0.979
MYO1D	-8.01	8	-1.49	0.0679	872	0.942	0.932	17057	0.979
IBSP	-8.01	8	-1.49	0.068	873	0.942	0.932	17056	0.979
KANSL1	-8	8	-1.49	0.0681	874	0.942	0.932	17055	0.979
MMP17	-8	8	-1.49	0.0682	875	0.942	0.932	17054	0.979
ERCC4	-8	8	-1.49	0.0683	876	0.942	0.932	17053	0.979
CLDN23	-8	8	-1.49	0.0683	877	0.942	0.932	17052	0.979
SULT1A2	-8	8	-1.49	0.0683	878	0.942	0.932	17051	0.979
FBXO34	-8	8	-1.49	0.0684	879	0.942	0.932	17050	0.979
BTG3	-7.99	8	-1.49	0.0686	880	0.942	0.931	17049	0.979
TTC1	-7.98	8	-1.49	0.0687	881	0.942	0.931	17048	0.979
NDRG3	-7.98	8	-1.49	0.0687	882	0.942	0.931	17047	0.979
CNOT1	-7.98	8	-1.48	0.0688	883	0.942	0.931	17046	0.979
EXD3	-7.98	8	-1.48	0.0689	884	0.942	0.931	17045	0.979
FHL3	-7.98	8	-1.48	0.0689	885	0.942	0.931	17044	0.979
CLCN1	-7.98	8	-1.48	0.0689	886	0.942	0.931	17043	0.979
FBXL2	-7.97	8	-1.48	0.069	887	0.942	0.931	17042	0.979
PLN	-3.99	2	-1.48	0.069	888	0.942	0.931	17041	0.979
CYP8B1	-7.97	8	-1.48	0.0691	889	0.942	0.931	17040	0.979
OARD1	-7.97	8	-1.48	0.0691	890	0.942	0.931	17039	0.979
TMEM131	-7.97	8	-1.48	0.0692	891	0.942	0.931	17038	0.979
C12orf39	-7.97	8	-1.48	0.0692	892	0.942	0.931	17037	0.979
SBNO1	-7.96	8	-1.48	0.0693	893	0.942	0.931	17036	0.979
GDPD5	-7.96	8	-1.48	0.0695	894	0.942	0.931	17035	0.979
CYP39A1	-7.96	8	-1.48	0.0695	895	0.942	0.93	17034	0.979
KCNQ4	-7.95	8	-1.48	0.0696	896	0.942	0.93	17033	0.979
MEOX1	-7.95	8	-1.48	0.0697	897	0.942	0.93	17032	0.979
SLC35F2	-7.95	8	-1.48	0.0698	898	0.942	0.93	17031	0.979
ARL6IP6	-7.95	8	-1.48	0.0698	899	0.942	0.93	17030	0.979
RB1	-7.94	8	-1.48	0.0699	900	0.942	0.93	17029	0.979
HAO1	-7.94	8	-1.48	0.07	901	0.942	0.93	17028	0.979
LEPREL4	-7.94	8	-1.47	0.0701	902	0.942	0.93	17027	0.979
PRKAG1	-7.93	8	-1.47	0.0702	903	0.942	0.93	17026	0.979
C20orf78	-7.93	8	-1.47	0.0702	904	0.942	0.93	17025	0.979
TTC29	-7.93	8	-1.47	0.0703	905	0.942	0.93	17024	0.979
TRIM43	-7.93	8	-1.47	0.0703	906	0.942	0.93	17023	0.979
RAVER2	-7.93	8	-1.47	0.0703	907	0.942	0.93	17022	0.979
THAP9	-7.92	8	-1.47	0.0706	908	0.942	0.929	17021	0.979
CTCFL	-7.92	8	-1.47	0.0707	909	0.942	0.929	17020	0.979
DENND5A	-7.91	8	-1.47	0.0707	910	0.942	0.929	17019	0.979
CNTN1	-7.91	8	-1.47	0.0708	911	0.942	0.929	17018	0.979
CHRNA4	-7.91	8	-1.47	0.0709	912	0.942	0.929	17017	0.979
RNF135	-7.91	8	-1.47	0.071	913	0.942	0.929	17016	0.979
TRAF3IP1	-7.9	8	-1.47	0.0711	914	0.942	0.929	17015	0.979
CLEC19A	-7.9	8	-1.47	0.0712	915	0.942	0.929	17014	0.979
PYCARD	-7.9	8	-1.47	0.0713	916	0.942	0.929	17013	0.979
TPGS2	-7.89	8	-1.47	0.0714	917	0.942	0.929	17012	0.979
USP9Y	-7.89	8	-1.47	0.0714	918	0.942	0.929	17011	0.979
NSRP1	-6.83	6	-1.46	0.0716	919	0.942	0.928	17010	0.979
2021-09-12	-7.89	8	-1.46	0.0716	920	0.942	0.928	17009	0.979
STX1A	-7.88	8	-1.46	0.0717	921	0.942	0.928	17008	0.979
SNX20	-7.88	8	-1.46	0.0717	922	0.942	0.928	17007	0.979
WDR86	-7.88	8	-1.46	0.0717	923	0.942	0.928	17006	0.979
VPS45	-7.88	8	-1.46	0.0717	924	0.942	0.928	17005	0.979
CYP26C1	-7.88	8	-1.46	0.0718	925	0.942	0.928	17004	0.979
SLC2A10	-7.88	8	-1.46	0.0718	926	0.942	0.928	17003	0.979
CDK5R1	-7.88	8	-1.46	0.0718	927	0.942	0.928	17002	0.979
PPP1R32	-7.88	8	-1.46	0.0719	928	0.942	0.928	17001	0.979
ERCC8	-7.88	8	-1.46	0.0719	929	0.942	0.928	17000	0.979
COPS4	-7.87	8	-1.46	0.072	930	0.942	0.928	16999	0.979
DDTL	-5.57	4	-1.46	0.0721	931	0.942	0.928	16998	0.979
HFE	-7.87	8	-1.46	0.0721	932	0.942	0.928	16997	0.979
IGSF22	-7.86	8	-1.46	0.0723	933	0.942	0.928	16996	0.979
FAM71C	-7.86	8	-1.46	0.0724	934	0.942	0.928	16995	0.979
HEXDC	-7.86	8	-1.46	0.0725	935	0.942	0.928	16994	0.979
EPHA5	-7.86	8	-1.46	0.0725	936	0.942	0.927	16993	0.978
FOXN2	-7.85	8	-1.46	0.0726	937	0.942	0.927	16992	0.978
PSIP1	-7.85	8	-1.46	0.0727	938	0.942	0.927	16991	0.978
ZNF397	-7.85	8	-1.46	0.0727	939	0.942	0.927	16990	0.978
SBF2	-7.85	8	-1.46	0.0728	940	0.942	0.927	16989	0.978
C1orf210	-7.84	8	-1.45	0.0729	941	0.942	0.927	16988	0.978
OR2M5	-5.55	4	-1.45	0.0729	942	0.942	0.927	16987	0.978
CNGA2	-7.84	8	-1.45	0.073	943	0.942	0.927	16986	0.978
PELP1	-5.54	4	-1.45	0.073	944	0.942	0.927	16985	0.978
SEMG1	-7.84	8	-1.45	0.0731	945	0.942	0.927	16984	0.978
C14orf142	-6.78	6	-1.45	0.0732	946	0.942	0.927	16983	0.978
GRN	-7.82	8	-1.45	0.0735	947	0.942	0.927	16982	0.978
PBK	-7.82	8	-1.45	0.0735	948	0.942	0.926	16981	0.978
NPFF	-7.82	8	-1.45	0.0735	949	0.942	0.926	16980	0.978
GLYATL2	-7.82	8	-1.45	0.0735	950	0.942	0.926	16979	0.978
KIF16B	-7.82	8	-1.45	0.0737	951	0.942	0.926	16978	0.978
TXNDC15	-7.81	8	-1.45	0.0739	952	0.942	0.926	16977	0.978
VAMP2	-7.81	8	-1.45	0.0739	953	0.942	0.926	16976	0.978
EDEM2	-7.81	8	-1.45	0.0739	954	0.942	0.926	16975	0.978
NELFE	-7.81	8	-1.45	0.074	955	0.942	0.926	16974	0.978
CHRM2	-7.8	8	-1.45	0.0742	956	0.942	0.926	16973	0.978
SLC6A7	-7.79	8	-1.44	0.0744	957	0.942	0.926	16972	0.978
RBAK	-7.79	8	-1.44	0.0745	958	0.942	0.925	16971	0.978
MGAT2	-7.79	8	-1.44	0.0745	959	0.942	0.925	16970	0.978
C16orf97	-7.79	8	-1.44	0.0746	960	0.942	0.925	16969	0.978
MYRFL	-7.79	8	-1.44	0.0746	961	0.942	0.925	16968	0.978
OR51Q1	-7.79	8	-1.44	0.0746	962	0.942	0.925	16967	0.978
SLC6A2	-7.79	8	-1.44	0.0746	963	0.942	0.925	16966	0.978
PLXDC2	-7.79	8	-1.44	0.0747	964	0.942	0.925	16965	0.978
IL18R1	-7.78	8	-1.44	0.0748	965	0.942	0.925	16964	0.978
SAGE1	-7.78	8	-1.44	0.0749	966	0.942	0.925	16963	0.978
P4HA2	-7.78	8	-1.44	0.0749	967	0.942	0.925	16962	0.978
C6orf52	-7.78	8	-1.44	0.075	968	0.942	0.925	16961	0.978
SOWAHD	-7.77	8	-1.44	0.075	969	0.942	0.925	16960	0.978
TRIM72	-7.77	8	-1.44	0.0751	970	0.942	0.925	16959	0.978
ZFYVE16	-7.77	8	-1.44	0.0752	971	0.942	0.925	16958	0.978
RAB36	-7.77	8	-1.44	0.0753	972	0.942	0.925	16957	0.978
NCK2	-7.76	8	-1.44	0.0753	973	0.942	0.925	16956	0.978
NXPE4	-7.76	8	-1.44	0.0754	974	0.942	0.925	16955	0.978
OR52N2	-7.75	8	-1.43	0.0757	975	0.942	0.924	16954	0.977
HIST1H4F	-7.75	8	-1.43	0.0758	976	0.942	0.924	16953	0.977
EBF1	-7.75	8	-1.43	0.0758	977	0.942	0.924	16952	0.977
ANKRD34B	-7.75	8	-1.43	0.0759	978	0.942	0.924	16951	0.977
BTBD7	-7.74	8	-1.43	0.0761	979	0.942	0.924	16950	0.977
HPCAL1	-7.74	8	-1.43	0.0761	980	0.942	0.924	16949	0.977
BEND2	-7.74	8	-1.43	0.0761	981	0.942	0.924	16948	0.977
SEZ6	-7.74	8	-1.43	0.0761	982	0.942	0.924	16947	0.977
C21orf33	-7.24	7	-1.43	0.0761	983	0.942	0.924	16946	0.977
PIRT	-7.73	8	-1.43	0.0764	984	0.942	0.924	16945	0.977
SLC17A8	-7.73	8	-1.43	0.0765	985	0.942	0.924	16944	0.977
EXOSC5	-7.22	7	-1.43	0.0767	986	0.942	0.923	16943	0.977
IRF2	-7.72	8	-1.43	0.0767	987	0.942	0.923	16942	0.977
MYEOV2	-7.72	8	-1.43	0.0768	988	0.942	0.923	16941	0.977
MLLT6	-7.72	8	-1.43	0.0768	989	0.942	0.923	16940	0.977
CPNE7	-7.72	8	-1.43	0.0768	990	0.942	0.923	16939	0.977
SOCS5	-7.72	8	-1.43	0.0769	991	0.942	0.923	16938	0.977
DYNC2LI1	-7.72	8	-1.43	0.0769	992	0.942	0.923	16937	0.977
COPB1	-7.71	8	-1.43	0.0769	993	0.942	0.923	16936	0.977
ITIH5	-7.71	8	-1.43	0.0771	994	0.942	0.923	16935	0.977
UGT1A8	-7.71	8	-1.42	0.0771	995	0.942	0.923	16934	0.977
WDR37	-7.71	8	-1.42	0.0771	996	0.942	0.923	16933	0.977
ST6GALNAC2	-7.71	8	-1.42	0.0771	997	0.942	0.923	16932	0.977
C10orf76	-7.71	8	-1.42	0.0771	998	0.942	0.923	16931	0.977
PTPRN	-7.7	8	-1.42	0.0772	999	0.942	0.923	16930	0.977
KCNJ2	-7.7	8	-1.42	0.0772	1000	0.942	0.923	16929	0.977
GPR158	-7.7	8	-1.42	0.0774	1001	0.942	0.923	16928	0.977
ASNSD1	-7.7	8	-1.42	0.0775	1002	0.942	0.923	16927	0.977
TMEM178A	-7.69	8	-1.42	0.0776	1003	0.942	0.922	16926	0.977
NUDT7	-7.69	8	-1.42	0.0776	1004	0.942	0.922	16925	0.977
TRAM1L1	-7.69	8	-1.42	0.0776	1005	0.942	0.922	16924	0.977
TUSC2	-7.69	8	-1.42	0.0776	1006	0.942	0.922	16923	0.977
GFRA3	-7.69	8	-1.42	0.0777	1007	0.942	0.922	16922	0.977
SNX8	-7.69	8	-1.42	0.0777	1008	0.942	0.922	16921	0.977
USP2	-7.69	8	-1.42	0.0778	1009	0.942	0.922	16920	0.977
DDX53	-7.68	8	-1.42	0.0779	1010	0.942	0.922	16919	0.977
PRLR	-7.68	8	-1.42	0.0779	1011	0.942	0.922	16918	0.977
NISCH	-7.68	8	-1.42	0.0779	1012	0.942	0.922	16917	0.977
KLHL17	-7.68	8	-1.42	0.0779	1013	0.942	0.922	16916	0.977
OR13H1	-7.68	8	-1.42	0.0781	1014	0.942	0.922	16915	0.977
BRD2	-7.67	8	-1.42	0.0783	1015	0.942	0.922	16914	0.977
ATIC	-7.67	8	-1.42	0.0783	1016	0.942	0.922	16913	0.977
DHX35	-7.67	8	-1.42	0.0783	1017	0.942	0.922	16912	0.977
FLOT2	-7.67	8	-1.42	0.0784	1018	0.942	0.922	16911	0.977
PGC	-7.67	8	-1.42	0.0785	1019	0.942	0.922	16910	0.977
PATZ1	-7.67	8	-1.42	0.0785	1020	0.942	0.922	16909	0.977
SOX11	-7.66	8	-1.41	0.0786	1021	0.942	0.921	16908	0.977
KCNH5	-7.66	8	-1.41	0.0787	1022	0.942	0.921	16907	0.977
ERAP2	-7.66	8	-1.41	0.0787	1023	0.942	0.921	16906	0.977
CCDC80	-7.66	8	-1.41	0.0787	1024	0.942	0.921	16905	0.977
PCMTD2	-7.66	8	-1.41	0.0788	1025	0.942	0.921	16904	0.977
CACNB4	-7.66	8	-1.41	0.0788	1026	0.942	0.921	16903	0.977
RAB8B	-7.65	8	-1.41	0.0788	1027	0.942	0.921	16902	0.977
MAP1B	-7.65	8	-1.41	0.0789	1028	0.942	0.921	16901	0.977
CAMSAP1	-7.65	8	-1.41	0.079	1029	0.942	0.921	16900	0.977
LRRC69	-7.65	8	-1.41	0.0791	1030	0.942	0.921	16899	0.977
CDC42EP4	-7.64	8	-1.41	0.0792	1031	0.942	0.921	16898	0.977
MTMR2	-7.64	8	-1.41	0.0794	1032	0.942	0.921	16897	0.977
EXOC3L4	-7.64	8	-1.41	0.0794	1033	0.942	0.921	16896	0.977
BRMS1	-6.61	6	-1.41	0.0794	1034	0.942	0.921	16895	0.977
MMP1	-7.64	8	-1.41	0.0794	1035	0.942	0.921	16894	0.977
EBF3	-6.61	6	-1.41	0.0794	1036	0.942	0.921	16893	0.977
BIRC6	-7.63	8	-1.41	0.0797	1037	0.942	0.92	16892	0.977
IRX5	-7.62	8	-1.41	0.0798	1038	0.942	0.92	16891	0.977
TMEM159	-7.62	8	-1.41	0.0798	1039	0.942	0.92	16890	0.977
TRAF6	-7.62	8	-1.41	0.0798	1040	0.942	0.92	16889	0.977
TFR2	-7.62	8	-1.41	0.0798	1041	0.942	0.92	16888	0.977
GULP1	-7.62	8	-1.41	0.08	1042	0.942	0.92	16887	0.977
ZNHIT1	-7.62	8	-1.41	0.08	1043	0.942	0.92	16886	0.977
CHORDC1	-7.62	8	-1.41	0.08	1044	0.942	0.92	16885	0.977
PPP2R1B	-7.62	8	-1.41	0.08	1045	0.942	0.92	16884	0.977
ORC5	-7.62	8	-1.41	0.08	1046	0.942	0.92	16883	0.977
GJA3	-7.62	8	-1.4	0.0801	1047	0.942	0.92	16882	0.977
ATG16L1	-7.61	8	-1.4	0.0802	1048	0.942	0.92	16881	0.977
KIF3A	-7.61	8	-1.4	0.0803	1049	0.942	0.92	16880	0.977
TRAIP	-7.12	7	-1.4	0.0803	1050	0.942	0.92	16879	0.977
GUCY2C	-7.61	8	-1.4	0.0803	1051	0.942	0.92	16878	0.977
C5orf52	-7.61	8	-1.4	0.0803	1052	0.942	0.92	16877	0.977
OR10AG1	-7.61	8	-1.4	0.0804	1053	0.942	0.92	16876	0.977
MTFP1	-7.61	8	-1.4	0.0804	1054	0.942	0.92	16875	0.977
IL12B	-7.6	8	-1.4	0.0805	1055	0.942	0.92	16874	0.977
PCGF3	-7.6	8	-1.4	0.0805	1056	0.942	0.92	16873	0.977
MANEAL	-7.6	8	-1.4	0.0805	1057	0.942	0.92	16872	0.977
NPY	-7.6	8	-1.4	0.0805	1058	0.942	0.919	16871	0.977
ACE	-7.6	8	-1.4	0.0807	1059	0.942	0.919	16870	0.977
FBXO47	-7.6	8	-1.4	0.0807	1060	0.942	0.919	16869	0.977
TMEM173	-7.59	8	-1.4	0.0808	1061	0.942	0.919	16868	0.977
RUNX1	-7.59	8	-1.4	0.0808	1062	0.942	0.919	16867	0.977
CES3	-7.59	8	-1.4	0.0809	1063	0.942	0.919	16866	0.977
FAM90A1	-6.57	6	-1.4	0.0809	1064	0.942	0.919	16865	0.977
ATRAID	-7.59	8	-1.4	0.081	1065	0.942	0.919	16864	0.977
C17orf77	-7.59	8	-1.4	0.081	1066	0.942	0.919	16863	0.977
ZBED4	-7.59	8	-1.4	0.081	1067	0.942	0.919	16862	0.977
SYT13	-7.59	8	-1.4	0.0811	1068	0.942	0.919	16861	0.977
SLC11A1	-7.59	8	-1.4	0.0811	1069	0.942	0.919	16860	0.977
MICALCL	-7.59	8	-1.4	0.0811	1070	0.942	0.919	16859	0.977
NRBP1	-7.58	8	-1.4	0.0811	1071	0.942	0.919	16858	0.977
RTTN	-7.09	7	-1.4	0.0812	1072	0.942	0.919	16857	0.977
FANCM	-7.58	8	-1.4	0.0812	1073	0.942	0.919	16856	0.977
HP	-7.58	8	-1.4	0.0812	1074	0.942	0.919	16855	0.977
CCDC137	-7.58	8	-1.4	0.0813	1075	0.942	0.919	16854	0.977
FAM46D	-7.58	8	-1.4	0.0813	1076	0.942	0.919	16853	0.977
KRT36	-7.58	8	-1.4	0.0814	1077	0.942	0.919	16852	0.977
ATG2B	-7.57	8	-1.4	0.0815	1078	0.942	0.919	16851	0.977
MAPK14	-7.57	8	-1.39	0.0815	1079	0.942	0.918	16850	0.977
EFCAB7	-7.57	8	-1.39	0.0816	1080	0.942	0.918	16849	0.977
CNNM4	-7.57	8	-1.39	0.0816	1081	0.942	0.918	16848	0.977
BNIP3	-7.57	8	-1.39	0.0816	1082	0.942	0.918	16847	0.977
SLTM	-7.57	8	-1.39	0.0817	1083	0.942	0.918	16846	0.977
H2AFJ	-7.57	8	-1.39	0.0817	1084	0.942	0.918	16845	0.977
RERE	-7.57	8	-1.39	0.0817	1085	0.942	0.918	16844	0.977
NAGPA	-7.56	8	-1.39	0.0818	1086	0.942	0.918	16843	0.977
MAPK8IP1	-7.56	8	-1.39	0.0818	1087	0.942	0.918	16842	0.977
ARL2BP	-5.35	4	-1.39	0.0818	1088	0.942	0.918	16841	0.977
CYFIP2	-7.56	8	-1.39	0.082	1089	0.942	0.918	16840	0.977
RNF186	-7.56	8	-1.39	0.082	1090	0.942	0.918	16839	0.977
SLC52A3	-7.56	8	-1.39	0.082	1091	0.942	0.918	16838	0.977
FAM115A	-7.56	8	-1.39	0.082	1092	0.942	0.918	16837	0.977
TSKU	-7.56	8	-1.39	0.0821	1093	0.942	0.918	16836	0.977
SLC4A9	-7.56	8	-1.39	0.0821	1094	0.942	0.918	16835	0.977
CYP24A1	-7.56	8	-1.39	0.0821	1095	0.942	0.918	16834	0.977
FGFR2	-7.55	8	-1.39	0.0823	1096	0.942	0.918	16833	0.977
IMPDH1	-7.06	7	-1.39	0.0823	1097	0.942	0.918	16832	0.977
HNF4G	-7.55	8	-1.39	0.0823	1098	0.942	0.918	16831	0.977
KANSL3	-7.54	8	-1.39	0.0825	1099	0.942	0.918	16830	0.977
ING2	-7.54	8	-1.39	0.0825	1100	0.942	0.918	16829	0.977
HAT1	-7.53	8	-1.39	0.0829	1101	0.942	0.917	16828	0.977
HECA	-7.53	8	-1.39	0.0829	1102	0.942	0.917	16827	0.977
MYL10	-7.53	8	-1.38	0.0831	1103	0.942	0.917	16826	0.977
MMRN2	-7.52	8	-1.38	0.0832	1104	0.942	0.917	16825	0.977
EMB	-7.52	8	-1.38	0.0832	1105	0.942	0.917	16824	0.977
SEMA3F	-7.52	8	-1.38	0.0832	1106	0.942	0.917	16823	0.977
SNX31	-7.52	8	-1.38	0.0832	1107	0.942	0.917	16822	0.977
LRRFIP2	-7.52	8	-1.38	0.0833	1108	0.942	0.917	16821	0.977
CFLAR	-7.51	8	-1.38	0.0835	1109	0.942	0.916	16820	0.977
ARHGAP21	-7.51	8	-1.38	0.0836	1110	0.942	0.916	16819	0.977
UBE2K	-7.51	8	-1.38	0.0836	1111	0.942	0.916	16818	0.977
TNP2	-7.51	8	-1.38	0.0837	1112	0.942	0.916	16817	0.977
PTPRN2	-7.51	8	-1.38	0.0837	1113	0.942	0.916	16816	0.977
C17orf102	-7.51	8	-1.38	0.0837	1114	0.942	0.916	16815	0.977
INTS10	-7.51	8	-1.38	0.0838	1115	0.942	0.916	16814	0.977
LRIG1	-7.5	8	-1.38	0.0838	1116	0.942	0.916	16813	0.977
POU1F1	-7.5	8	-1.38	0.084	1117	0.942	0.916	16812	0.977
GNL3	-5.3	4	-1.38	0.0841	1118	0.942	0.916	16811	0.977
AHCY	-7.49	8	-1.38	0.0841	1119	0.942	0.916	16810	0.977
DUS4L	-7.49	8	-1.38	0.0842	1120	0.942	0.916	16809	0.977
AMD1	-7.49	8	-1.38	0.0842	1121	0.942	0.916	16808	0.977
NR0B1	-7.49	8	-1.38	0.0843	1122	0.942	0.916	16807	0.977
MTCP1	-7.49	8	-1.38	0.0843	1123	0.942	0.916	16806	0.977
2021-03-10	-7.49	8	-1.38	0.0843	1124	0.942	0.916	16805	0.977
C5orf60	-7.49	8	-1.38	0.0844	1125	0.942	0.916	16804	0.977
CNTN4	-7.49	8	-1.38	0.0844	1126	0.942	0.916	16803	0.977
GPR148	-7.48	8	-1.38	0.0845	1127	0.942	0.916	16802	0.977
RALGAPA1	-7.48	8	-1.37	0.0846	1128	0.942	0.915	16801	0.977
XYLT1	-7.48	8	-1.37	0.0847	1129	0.942	0.915	16800	0.977
SMPD2	-7.48	8	-1.37	0.0848	1130	0.942	0.915	16799	0.977
MRPS14	-6.47	6	-1.37	0.0848	1131	0.942	0.915	16798	0.977
NEUROD2	-7.47	8	-1.37	0.0848	1132	0.942	0.915	16797	0.977
GID4	-7.47	8	-1.37	0.085	1133	0.942	0.915	16796	0.977
GPR6	-7.47	8	-1.37	0.085	1134	0.942	0.915	16795	0.977
GLRB	-7.47	8	-1.37	0.0851	1135	0.942	0.915	16794	0.977
TAF15	-6.47	6	-1.37	0.0851	1136	0.942	0.915	16793	0.977
SEMA3G	-7.47	8	-1.37	0.0851	1137	0.942	0.915	16792	0.977
FLOT1	-7.46	8	-1.37	0.0852	1138	0.942	0.915	16791	0.977
CPEB3	-7.46	8	-1.37	0.0852	1139	0.942	0.915	16790	0.977
ORC4	-7.46	8	-1.37	0.0852	1140	0.942	0.915	16789	0.977
TMEM33	-7.46	8	-1.37	0.0853	1141	0.942	0.915	16788	0.977
TNIP1	-7.46	8	-1.37	0.0853	1142	0.942	0.915	16787	0.977
DSP	-7.46	8	-1.37	0.0854	1143	0.942	0.915	16786	0.977
ZBED6CL	-7.46	8	-1.37	0.0854	1144	0.942	0.915	16785	0.977
FSBP	-7.46	8	-1.37	0.0855	1145	0.942	0.915	16784	0.977
YPEL3	-7.45	8	-1.37	0.0856	1146	0.942	0.914	16783	0.977
CYP3A5	-7.45	8	-1.37	0.0858	1147	0.942	0.914	16782	0.977
TREM2	-7.44	8	-1.37	0.0858	1148	0.942	0.914	16781	0.977
PROCR	-7.44	8	-1.37	0.086	1149	0.942	0.914	16780	0.976
SLC4A1	-7.44	8	-1.37	0.0861	1150	0.942	0.914	16779	0.976
CIAO1	-7.44	8	-1.36	0.0861	1151	0.942	0.914	16778	0.976
CASP4	-7.44	8	-1.36	0.0861	1152	0.942	0.914	16777	0.976
LITAF	-7.44	8	-1.36	0.0862	1153	0.942	0.914	16776	0.976
C3orf33	-5.25	4	-1.36	0.0863	1154	0.942	0.914	16775	0.976
B4GALT5	-7.43	8	-1.36	0.0865	1155	0.942	0.914	16774	0.976
CACNG3	-7.43	8	-1.36	0.0865	1156	0.942	0.913	16773	0.976
C2orf16	-7.42	8	-1.36	0.0866	1157	0.942	0.913	16772	0.976
MFSD7	-7.42	8	-1.36	0.0867	1158	0.942	0.913	16771	0.976
RGS17	-6.43	6	-1.36	0.0867	1159	0.942	0.913	16770	0.976
PRDM15	-7.42	8	-1.36	0.0867	1160	0.942	0.913	16769	0.976
SPATA31D1	-7.41	8	-1.36	0.0869	1161	0.942	0.913	16768	0.976
IFT20	-7.41	8	-1.36	0.0869	1162	0.942	0.913	16767	0.976
CDC123	-7.41	8	-1.36	0.0871	1163	0.942	0.913	16766	0.976
HBP1	-7.41	8	-1.36	0.0871	1164	0.942	0.913	16765	0.976
SPC25	-6.93	7	-1.36	0.0873	1165	0.942	0.913	16764	0.976
CLDN3	-7.4	8	-1.36	0.0873	1166	0.942	0.913	16763	0.976
AKTIP	-7.4	8	-1.36	0.0873	1167	0.942	0.913	16762	0.976
STX11	-7.4	8	-1.36	0.0874	1168	0.942	0.913	16761	0.976
TBX21	-7.4	8	-1.36	0.0874	1169	0.942	0.913	16760	0.976
DAZAP2	-7.4	8	-1.36	0.0875	1170	0.942	0.913	16759	0.976
WSB1	-7.4	8	-1.36	0.0875	1171	0.942	0.912	16758	0.976
ATF7	-7.39	8	-1.35	0.0879	1172	0.942	0.912	16757	0.976
NOM1	-7.39	8	-1.35	0.0879	1173	0.942	0.912	16756	0.976
PLA2G2C	-7.38	8	-1.35	0.088	1174	0.942	0.912	16755	0.976
TOM1L1	-7.38	8	-1.35	0.088	1175	0.942	0.912	16754	0.976
ZNF134	-7.38	8	-1.35	0.088	1176	0.942	0.912	16753	0.976
CCDC175	-7.38	8	-1.35	0.0882	1177	0.942	0.912	16752	0.976
MIS18BP1	-7.38	8	-1.35	0.0882	1178	0.942	0.912	16751	0.976
OR2Y1	-7.38	8	-1.35	0.0882	1179	0.942	0.912	16750	0.976
NNT	-7.38	8	-1.35	0.0882	1180	0.942	0.912	16749	0.976
FGD2	-7.37	8	-1.35	0.0883	1181	0.942	0.912	16748	0.976
DAZL	-7.37	8	-1.35	0.0884	1182	0.942	0.912	16747	0.976
NTNG1	-6.89	7	-1.35	0.0885	1183	0.942	0.912	16746	0.976
ASPHD2	-7.37	8	-1.35	0.0885	1184	0.942	0.912	16745	0.976
SAP130	-7.37	8	-1.35	0.0885	1185	0.942	0.911	16744	0.976
INPP5J	-7.37	8	-1.35	0.0885	1186	0.942	0.911	16743	0.976
GRID2IP	-7.37	8	-1.35	0.0886	1187	0.942	0.911	16742	0.976
TIMD4	-7.37	8	-1.35	0.0886	1188	0.942	0.911	16741	0.976
C7orf26	-7.37	8	-1.35	0.0886	1189	0.942	0.911	16740	0.976
SPATA25	-7.36	8	-1.35	0.0887	1190	0.942	0.911	16739	0.976
ZNF236	-7.36	8	-1.35	0.0888	1191	0.942	0.911	16738	0.976
DMGDH	-7.36	8	-1.35	0.0888	1192	0.942	0.911	16737	0.976
DFNA5	-7.36	8	-1.35	0.0889	1193	0.942	0.911	16736	0.976
RALGDS	-7.36	8	-1.35	0.0889	1194	0.942	0.911	16735	0.976
GNGT2	-7.36	8	-1.35	0.089	1195	0.942	0.911	16734	0.976
ABL1	-7.35	8	-1.35	0.089	1196	0.942	0.911	16733	0.976
MYO3A	-7.35	8	-1.35	0.089	1197	0.942	0.911	16732	0.976
TPSAB1	-7.35	8	-1.35	0.0893	1198	0.942	0.911	16731	0.976
PCDHGA7	-7.35	8	-1.34	0.0893	1199	0.942	0.911	16730	0.976
SRRT	-7.34	8	-1.34	0.0894	1200	0.942	0.911	16729	0.976
ADRA2C	-7.34	8	-1.34	0.0895	1201	0.942	0.911	16728	0.976
FAM227B	-7.34	8	-1.34	0.0896	1202	0.942	0.91	16727	0.976
TXNDC17	-7.34	8	-1.34	0.0897	1203	0.942	0.91	16726	0.976
GLP2R	-7.34	8	-1.34	0.0897	1204	0.942	0.91	16725	0.976
ARHGAP12	-7.33	8	-1.34	0.0897	1205	0.942	0.91	16724	0.976
PLCB1	-7.33	8	-1.34	0.0898	1206	0.942	0.91	16723	0.976
DERL2	-7.33	8	-1.34	0.0899	1207	0.942	0.91	16722	0.976
CEMP1	-7.33	8	-1.34	0.0899	1208	0.942	0.91	16721	0.976
FMNL1	-7.33	8	-1.34	0.09	1209	0.942	0.91	16720	0.976
H1FX	-7.33	8	-1.34	0.09	1210	0.942	0.91	16719	0.976
AOC3	-7.32	8	-1.34	0.0902	1211	0.942	0.91	16718	0.976
TGFB1I1	-7.32	8	-1.34	0.0903	1212	0.942	0.91	16717	0.976
PTPN13	-7.32	8	-1.34	0.0903	1213	0.942	0.91	16716	0.976
CSF1R	-7.32	8	-1.34	0.0903	1214	0.942	0.91	16715	0.976
CHP1	-7.32	8	-1.34	0.0904	1215	0.942	0.91	16714	0.976
ASB14	-7.31	8	-1.34	0.0904	1216	0.942	0.91	16713	0.976
DSC1	-7.31	8	-1.34	0.0905	1217	0.942	0.91	16712	0.976
UBA6	-7.31	8	-1.34	0.0905	1218	0.942	0.91	16711	0.976
PAM	-7.31	8	-1.34	0.0906	1219	0.942	0.909	16710	0.976
CLEC4F	-7.31	8	-1.34	0.0907	1220	0.942	0.909	16709	0.976
MORC2	-7.31	8	-1.34	0.0907	1221	0.942	0.909	16708	0.976
VPS52	-7.31	8	-1.34	0.0907	1222	0.942	0.909	16707	0.976
SPINK8	-7.31	8	-1.34	0.0907	1223	0.942	0.909	16706	0.976
ATP6V1C1	-7.31	8	-1.34	0.0908	1224	0.942	0.909	16705	0.976
OPN1SW	-7.3	8	-1.34	0.0908	1225	0.942	0.909	16704	0.976
HAPLN1	-7.3	8	-1.34	0.0908	1226	0.942	0.909	16703	0.976
MAP3K1	-7.3	8	-1.34	0.0909	1227	0.942	0.909	16702	0.976
MSRA	-7.3	8	-1.33	0.091	1228	0.942	0.909	16701	0.976
PCBP4	-7.3	8	-1.33	0.091	1229	0.942	0.909	16700	0.976
RSAD2	-7.3	8	-1.33	0.091	1230	0.942	0.909	16699	0.976
HDAC7	-7.3	8	-1.33	0.091	1231	0.942	0.909	16698	0.976
THY1	-7.29	8	-1.33	0.0911	1232	0.942	0.909	16697	0.976
SGCA	-7.29	8	-1.33	0.0911	1233	0.942	0.909	16696	0.976
TMEM223	-7.29	8	-1.33	0.0912	1234	0.942	0.909	16695	0.976
WNT5A	-7.29	8	-1.33	0.0912	1235	0.942	0.909	16694	0.976
SASH3	-7.29	8	-1.33	0.0912	1236	0.942	0.909	16693	0.976
NEURL1B	-7.29	8	-1.33	0.0913	1237	0.942	0.909	16692	0.976
EPAS1	-7.29	8	-1.33	0.0913	1238	0.942	0.909	16691	0.976
FGGY	-7.29	8	-1.33	0.0913	1239	0.942	0.909	16690	0.976
CD163L1	-7.28	8	-1.33	0.0915	1240	0.942	0.908	16689	0.976
ZNF23	-7.28	8	-1.33	0.0915	1241	0.942	0.908	16688	0.976
TNRC6B	-7.28	8	-1.33	0.0916	1242	0.942	0.908	16687	0.976
GJB1	-7.28	8	-1.33	0.0916	1243	0.942	0.908	16686	0.976
DNAJC17	-7.28	8	-1.33	0.0916	1244	0.942	0.908	16685	0.976
OR2M2	-3.64	2	-1.33	0.0917	1245	0.942	0.908	16684	0.976
CPSF7	-7.28	8	-1.33	0.0918	1246	0.942	0.908	16683	0.976
TSPYL6	-7.27	8	-1.33	0.0919	1247	0.942	0.908	16682	0.976
SNCA	-7.27	8	-1.33	0.092	1248	0.942	0.908	16681	0.976
ZCCHC3	-7.27	8	-1.33	0.0922	1249	0.942	0.908	16680	0.976
RNF2	-7.26	8	-1.33	0.0924	1250	0.942	0.908	16679	0.976
CTDSPL2	-7.26	8	-1.33	0.0924	1251	0.942	0.908	16678	0.976
TALDO1	-7.26	8	-1.33	0.0924	1252	0.942	0.908	16677	0.976
ANKRD55	-7.25	8	-1.32	0.0926	1253	0.942	0.907	16676	0.976
TXLNB	-7.25	8	-1.32	0.0927	1254	0.942	0.907	16675	0.975
SLAIN2	-7.25	8	-1.32	0.0928	1255	0.942	0.907	16674	0.975
BARX2	-7.24	8	-1.32	0.0932	1256	0.942	0.907	16673	0.975
ZSWIM1	-7.23	8	-1.32	0.0933	1257	0.942	0.907	16672	0.975
INSL4	-7.23	8	-1.32	0.0933	1258	0.942	0.907	16671	0.975
SMARCA2	-7.23	8	-1.32	0.0934	1259	0.942	0.907	16670	0.975
HIST1H3I	-7.23	8	-1.32	0.0934	1260	0.942	0.907	16669	0.975
ANKRD37	-7.23	8	-1.32	0.0934	1261	0.942	0.907	16668	0.975
ATP6V0A1	-7.23	8	-1.32	0.0934	1262	0.942	0.907	16667	0.975
CTIF	-7.23	8	-1.32	0.0935	1263	0.942	0.907	16666	0.975
LMO4	-7.23	8	-1.32	0.0936	1264	0.942	0.906	16665	0.975
PTPRJ	-7.22	8	-1.32	0.0938	1265	0.942	0.906	16664	0.975
SYNPO2	-7.22	8	-1.32	0.0938	1266	0.942	0.906	16663	0.975
PDCD7	-7.22	8	-1.32	0.0938	1267	0.942	0.906	16662	0.975
PSME2	-7.22	8	-1.32	0.0939	1268	0.942	0.906	16661	0.975
OGFOD2	-7.22	8	-1.32	0.0939	1269	0.942	0.906	16660	0.975
CALCRL	-7.22	8	-1.32	0.0939	1270	0.942	0.906	16659	0.975
DNAJC15	-7.22	8	-1.32	0.0939	1271	0.942	0.906	16658	0.975
FAM222B	-7.21	8	-1.32	0.0941	1272	0.942	0.906	16657	0.975
NOSTRIN	-7.21	8	-1.31	0.0944	1273	0.942	0.906	16656	0.975
ENGASE	-7.21	8	-1.31	0.0944	1274	0.942	0.906	16655	0.975
PANX3	-7.2	8	-1.31	0.0944	1275	0.942	0.906	16654	0.975
NEK10	-7.2	8	-1.31	0.0946	1276	0.942	0.905	16653	0.975
C16orf90	-7.2	8	-1.31	0.0946	1277	0.942	0.905	16652	0.975
TGM3	-7.2	8	-1.31	0.0947	1278	0.942	0.905	16651	0.975
ANKRD33B	-7.19	8	-1.31	0.0949	1279	0.942	0.905	16650	0.975
ORC1	-7.19	8	-1.31	0.095	1280	0.942	0.905	16649	0.975
KCNH2	-7.18	8	-1.31	0.0952	1281	0.942	0.905	16648	0.974
CHTF18	-7.18	8	-1.31	0.0952	1282	0.942	0.905	16647	0.974
VSTM2L	-7.18	8	-1.31	0.0952	1283	0.942	0.905	16646	0.974
PRPSAP2	-7.18	8	-1.31	0.0952	1284	0.942	0.905	16645	0.974
DNAJB9	-7.18	8	-1.31	0.0953	1285	0.942	0.905	16644	0.974
SRPX2	-7.18	8	-1.31	0.0953	1286	0.942	0.905	16643	0.974
PI15	-7.18	8	-1.31	0.0953	1287	0.942	0.905	16642	0.974
GINS3	-7.18	8	-1.31	0.0953	1288	0.942	0.905	16641	0.974
STIL	-7.18	8	-1.31	0.0954	1289	0.942	0.905	16640	0.974
SNTB1	-7.18	8	-1.31	0.0954	1290	0.942	0.905	16639	0.974
OTOR	-7.18	8	-1.31	0.0954	1291	0.942	0.905	16638	0.974
USP10	-7.18	8	-1.31	0.0955	1292	0.942	0.905	16637	0.974
WFDC9	-7.17	8	-1.31	0.0955	1293	0.942	0.904	16636	0.974
SRP72	-7.17	8	-1.31	0.0956	1294	0.942	0.904	16635	0.974
OR5A2	-7.17	8	-1.31	0.0958	1295	0.942	0.904	16634	0.974
RNASEH2B	-7.17	8	-1.31	0.0959	1296	0.942	0.904	16633	0.974
PLEKHA7	-7.16	8	-1.31	0.0959	1297	0.942	0.904	16632	0.974
DCUN1D4	-7.16	8	-1.3	0.0959	1298	0.942	0.904	16631	0.974
C1orf52	-7.16	8	-1.3	0.096	1299	0.942	0.904	16630	0.974
VPS72	-7.16	8	-1.3	0.096	1300	0.942	0.904	16629	0.974
CCP110	-7.16	8	-1.3	0.096	1301	0.942	0.904	16628	0.974
CDAN1	-7.16	8	-1.3	0.096	1302	0.942	0.904	16627	0.974
FHL2	-7.16	8	-1.3	0.096	1303	0.942	0.904	16626	0.974
MS4A10	-7.16	8	-1.3	0.0961	1304	0.942	0.904	16625	0.974
ZDHHC17	-7.16	8	-1.3	0.0962	1305	0.942	0.904	16624	0.974
SPSB2	-7.16	8	-1.3	0.0962	1306	0.942	0.904	16623	0.974
PRR5L	-7.16	8	-1.3	0.0962	1307	0.942	0.904	16622	0.974
HINT2	-7.16	8	-1.3	0.0962	1308	0.942	0.904	16621	0.974
IL1RL1	-7.16	8	-1.3	0.0962	1309	0.942	0.904	16620	0.974
LRFN5	-7.16	8	-1.3	0.0963	1310	0.942	0.904	16619	0.974
FEZF2	-7.15	8	-1.3	0.0963	1311	0.942	0.904	16618	0.974
SLC35F6	-7.15	8	-1.3	0.0964	1312	0.942	0.904	16617	0.974
ACTA2	-7.15	8	-1.3	0.0964	1313	0.942	0.904	16616	0.974
PHLPP2	-7.15	8	-1.3	0.0964	1314	0.942	0.904	16615	0.974
C12orf50	-7.15	8	-1.3	0.0964	1315	0.942	0.904	16614	0.974
CABP7	-6.19	6	-1.3	0.0964	1316	0.942	0.904	16613	0.974
HYAL1	-7.15	8	-1.3	0.0965	1317	0.942	0.904	16612	0.974
PCM1	-7.15	8	-1.3	0.0965	1318	0.942	0.904	16611	0.974
KCTD9	-6.19	6	-1.3	0.0965	1319	0.942	0.904	16610	0.974
ATAD5	-7.15	8	-1.3	0.0965	1320	0.942	0.903	16609	0.974
OR5D13	-7.15	8	-1.3	0.0966	1321	0.942	0.903	16608	0.974
PEX3	-7.15	8	-1.3	0.0966	1322	0.942	0.903	16607	0.974
KRT9	-7.15	8	-1.3	0.0966	1323	0.942	0.903	16606	0.974
CRIM1	-7.15	8	-1.3	0.0966	1324	0.942	0.903	16605	0.974
RBM24	-7.15	8	-1.3	0.0966	1325	0.942	0.903	16604	0.974
STARD6	-7.14	8	-1.3	0.0967	1326	0.942	0.903	16603	0.974
DCAF13	-6.68	7	-1.3	0.0967	1327	0.942	0.903	16602	0.974
ANKDD1B	-7.14	8	-1.3	0.0968	1328	0.942	0.903	16601	0.974
PDX1	-7.14	8	-1.3	0.0968	1329	0.942	0.903	16600	0.974
TPT1	-7.14	8	-1.3	0.0968	1330	0.942	0.903	16599	0.974
STARD10	-7.14	8	-1.3	0.0968	1331	0.942	0.903	16598	0.974
BMP7	-7.14	8	-1.3	0.0969	1332	0.942	0.903	16597	0.974
C17orf53	-7.14	8	-1.3	0.0969	1333	0.942	0.903	16596	0.974
C5orf24	-7.14	8	-1.3	0.097	1334	0.942	0.903	16595	0.974
ADAM33	-7.14	8	-1.3	0.097	1335	0.942	0.903	16594	0.974
XPO6	-7.14	8	-1.3	0.097	1336	0.942	0.903	16593	0.974
ZBTB37	-7.13	8	-1.3	0.0971	1337	0.942	0.903	16592	0.974
ASUN	-7.13	8	-1.3	0.0971	1338	0.942	0.903	16591	0.974
MACROD2	-7.13	8	-1.3	0.0971	1339	0.942	0.903	16590	0.974
REG1A	-7.13	8	-1.3	0.0972	1340	0.942	0.903	16589	0.974
PLD4	-7.13	8	-1.3	0.0974	1341	0.942	0.903	16588	0.974
RAD54L2	-7.13	8	-1.3	0.0974	1342	0.942	0.903	16587	0.974
EME1	-7.13	8	-1.3	0.0974	1343	0.942	0.903	16586	0.974
TET3	-7.12	8	-1.3	0.0974	1344	0.942	0.903	16585	0.974
CDIPT	-6.17	6	-1.3	0.0974	1345	0.942	0.903	16584	0.974
SIGLEC15	-7.12	8	-1.3	0.0975	1346	0.942	0.903	16583	0.974
RFNG	-7.12	8	-1.3	0.0975	1347	0.942	0.902	16582	0.974
MAT2B	-7.12	8	-1.3	0.0975	1348	0.942	0.902	16581	0.974
OR52B4	-7.12	8	-1.3	0.0975	1349	0.942	0.902	16580	0.974
HSPA4	-7.12	8	-1.3	0.0976	1350	0.942	0.902	16579	0.974
PRKCH	-7.12	8	-1.3	0.0976	1351	0.942	0.902	16578	0.974
GCK	-7.12	8	-1.29	0.0977	1352	0.942	0.902	16577	0.974
PPIP5K2	-7.12	8	-1.29	0.0977	1353	0.942	0.902	16576	0.974
TTC39C	-7.12	8	-1.29	0.0978	1354	0.942	0.902	16575	0.974
GRIA1	-7.11	8	-1.29	0.0978	1355	0.942	0.902	16574	0.974
DPEP3	-7.11	8	-1.29	0.0978	1356	0.942	0.902	16573	0.974
KNG1	-7.11	8	-1.29	0.0979	1357	0.942	0.902	16572	0.974
PAK2	-7.11	8	-1.29	0.098	1358	0.942	0.902	16571	0.974
TCN2	-7.11	8	-1.29	0.098	1359	0.942	0.902	16570	0.974
APCDD1	-7.11	8	-1.29	0.098	1360	0.942	0.902	16569	0.974
PTTG1IP	-7.11	8	-1.29	0.0981	1361	0.942	0.902	16568	0.974
CDK10	-7.11	8	-1.29	0.0981	1362	0.942	0.902	16567	0.974
APOH	-7.11	8	-1.29	0.0981	1363	0.942	0.902	16566	0.974
ABTB2	-7.11	8	-1.29	0.0981	1364	0.942	0.902	16565	0.974
ACYP1	-7.11	8	-1.29	0.0981	1365	0.942	0.902	16564	0.974
SCAP	-7.11	8	-1.29	0.0981	1366	0.942	0.902	16563	0.974
IK	-7.11	8	-1.29	0.0981	1367	0.942	0.902	16562	0.974
GPR128	-7.11	8	-1.29	0.0981	1368	0.942	0.902	16561	0.974
FADS3	-7.11	8	-1.29	0.0982	1369	0.942	0.902	16560	0.974
MOB1B	-7.1	8	-1.29	0.0982	1370	0.942	0.902	16559	0.974
IZUMO3	-7.1	8	-1.29	0.0983	1371	0.942	0.902	16558	0.974
FAT1	-7.1	8	-1.29	0.0983	1372	0.942	0.902	16557	0.974
NDC1	-7.1	8	-1.29	0.0983	1373	0.942	0.902	16556	0.974
ZNF474	-7.1	8	-1.29	0.0983	1374	0.942	0.902	16555	0.974
CYP27B1	-7.1	8	-1.29	0.0984	1375	0.942	0.902	16554	0.974
SPOCK1	-7.1	8	-1.29	0.0984	1376	0.942	0.902	16553	0.974
SLC15A4	-7.1	8	-1.29	0.0985	1377	0.942	0.902	16552	0.974
FBXO3	-7.1	8	-1.29	0.0985	1378	0.942	0.901	16551	0.974
ZKSCAN2	-7.1	8	-1.29	0.0985	1379	0.942	0.901	16550	0.974
PHF13	-7.09	8	-1.29	0.0986	1380	0.942	0.901	16549	0.974
NDFIP2	-7.09	8	-1.29	0.0986	1381	0.942	0.901	16548	0.974
DSCAML1	-7.09	8	-1.29	0.0986	1382	0.942	0.901	16547	0.974
LCN6	-7.09	8	-1.29	0.0987	1383	0.942	0.901	16546	0.974
CCL13	-7.09	8	-1.29	0.0987	1384	0.942	0.901	16545	0.974
ART1	-7.09	8	-1.29	0.0988	1385	0.942	0.901	16544	0.974
CCR9	-7.09	8	-1.29	0.0989	1386	0.942	0.901	16543	0.974
ZNF697	-7.09	8	-1.29	0.0989	1387	0.942	0.901	16542	0.974
GSDMD	-7.09	8	-1.29	0.0989	1388	0.942	0.901	16541	0.974
LRP2	-7.08	8	-1.29	0.099	1389	0.942	0.901	16540	0.974
IRF7	-7.08	8	-1.29	0.0992	1390	0.942	0.901	16539	0.974
SLC17A4	-7.08	8	-1.29	0.0993	1391	0.942	0.901	16538	0.974
SDAD1	-7.07	8	-1.29	0.0993	1392	0.942	0.901	16537	0.974
KLB	-7.07	8	-1.29	0.0994	1393	0.942	0.901	16536	0.974
NHS	-7.07	8	-1.28	0.0995	1394	0.942	0.901	16535	0.974
OR52N1	-7.07	8	-1.28	0.0995	1395	0.942	0.9	16534	0.974
UBXN2B	-7.07	8	-1.28	0.0997	1396	0.942	0.9	16533	0.974
GADL1	-7.07	8	-1.28	0.0997	1397	0.942	0.9	16532	0.974
ZNF318	-7.07	8	-1.28	0.0997	1398	0.942	0.9	16531	0.974
C17orf104	-7.06	8	-1.28	0.0997	1399	0.942	0.9	16530	0.974
ID1	-7.06	8	-1.28	0.0997	1400	0.942	0.9	16529	0.974
ITGAD	-7.06	8	-1.28	0.0998	1401	0.942	0.9	16528	0.974
GOLGA7	-7.06	8	-1.28	0.0998	1402	0.942	0.9	16527	0.974
SIRPB1	-7.06	8	-1.28	0.0998	1403	0.942	0.9	16526	0.974
IFNW1	-7.06	8	-1.28	0.0999	1404	0.942	0.9	16525	0.974
ANGPT2	-7.06	8	-1.28	0.0999	1405	0.942	0.9	16524	0.974
NLRP1	-7.06	8	-1.28	0.1	1406	0.942	0.9	16523	0.974
BDP1	-7.06	8	-1.28	0.1	1407	0.942	0.9	16522	0.974
RAB40B	-7.06	8	-1.28	0.1	1408	0.942	0.9	16521	0.974
DSCAM	-7.05	8	-1.28	0.1	1409	0.942	0.9	16520	0.974
SNX15	-7.05	8	-1.28	0.1	1410	0.942	0.9	16519	0.974
SST	-7.05	8	-1.28	0.1	1411	0.942	0.9	16518	0.974
PIP	-4.99	4	-1.28	0.1	1412	0.942	0.9	16517	0.974
OXLD1	-7.05	8	-1.28	0.1	1413	0.942	0.9	16516	0.974
RIN1	-7.05	8	-1.28	0.1	1414	0.942	0.9	16515	0.974
LEPRE1	-7.05	8	-1.28	0.1	1415	0.942	0.9	16514	0.974
RBMS3	-7.05	8	-1.28	0.1	1416	0.942	0.9	16513	0.974
SBDS	-7.05	8	-1.28	0.1	1417	0.942	0.9	16512	0.974
GDF5	-7.04	8	-1.28	0.1	1418	0.942	0.9	16511	0.974
RBBP8NL	-7.04	8	-1.28	0.1	1419	0.942	0.9	16510	0.974
SIL1	-7.04	8	-1.28	0.101	1420	0.942	0.899	16509	0.974
PYGB	-7.04	8	-1.28	0.101	1421	0.942	0.899	16508	0.974
TMEM52	-7.04	8	-1.28	0.101	1422	0.942	0.899	16507	0.974
GMEB2	-7.04	8	-1.28	0.101	1423	0.942	0.899	16506	0.974
L3MBTL3	-7.04	8	-1.28	0.101	1424	0.942	0.899	16505	0.974
UROC1	-7.03	8	-1.28	0.101	1425	0.942	0.899	16504	0.974
SVIP	-4.97	4	-1.28	0.101	1426	0.942	0.899	16503	0.974
NLGN1	-7.03	8	-1.28	0.101	1427	0.942	0.899	16502	0.974
CXorf61	-7.03	8	-1.28	0.101	1428	0.942	0.899	16501	0.974
MTSS1L	-7.03	8	-1.28	0.101	1429	0.942	0.899	16500	0.974
MBNL3	-7.03	8	-1.28	0.101	1430	0.942	0.899	16499	0.974
SDCCAG3	-7.03	8	-1.28	0.101	1431	0.942	0.899	16498	0.974
OS9	-7.03	8	-1.27	0.101	1432	0.942	0.899	16497	0.974
CHRNA2	-7.03	8	-1.27	0.101	1433	0.942	0.899	16496	0.974
PDHA1	-7.03	8	-1.27	0.101	1434	0.942	0.899	16495	0.974
MSANTD2	-6.08	6	-1.27	0.101	1435	0.942	0.899	16494	0.974
TMEM123	-7.03	8	-1.27	0.101	1436	0.942	0.899	16493	0.974
ARHGAP42	-6.08	6	-1.27	0.101	1437	0.942	0.899	16492	0.974
FAM102B	-7.02	8	-1.27	0.101	1438	0.942	0.899	16491	0.974
COX8C	-7.02	8	-1.27	0.102	1439	0.942	0.898	16490	0.974
OR10D3	-7.02	8	-1.27	0.102	1440	0.942	0.898	16489	0.974
RPS6KA4	-7.02	8	-1.27	0.102	1441	0.942	0.898	16488	0.974
MMP27	-7.02	8	-1.27	0.102	1442	0.942	0.898	16487	0.974
ZC3HAV1	-7.02	8	-1.27	0.102	1443	0.942	0.898	16486	0.974
FAM183A	-7.01	8	-1.27	0.102	1444	0.942	0.898	16485	0.974
RAB11A	-7.01	8	-1.27	0.102	1445	0.942	0.898	16484	0.974
RPL35A	-6.07	6	-1.27	0.102	1446	0.942	0.898	16483	0.974
ACTR10	-7.01	8	-1.27	0.102	1447	0.942	0.898	16482	0.974
SAT2	-7	8	-1.27	0.102	1448	0.942	0.898	16481	0.974
MEDAG	-7	8	-1.27	0.102	1449	0.942	0.898	16480	0.974
ARHGEF38	-7	8	-1.27	0.102	1450	0.942	0.898	16479	0.974
PCDHGB7	-7	8	-1.27	0.102	1451	0.942	0.898	16478	0.974
CENPQ	-6.06	6	-1.27	0.102	1452	0.942	0.898	16477	0.974
ARPP19	-7	8	-1.27	0.102	1453	0.942	0.898	16476	0.974
MAPT	-7	8	-1.27	0.102	1454	0.942	0.898	16475	0.974
SETD9	-6.99	8	-1.27	0.103	1455	0.942	0.897	16474	0.974
FAM210B	-6.99	8	-1.27	0.103	1456	0.942	0.897	16473	0.974
FOXO3	-6.99	8	-1.27	0.103	1457	0.942	0.897	16472	0.974
GPR180	-6.99	8	-1.27	0.103	1458	0.942	0.897	16471	0.974
TMEM43	-6.99	8	-1.27	0.103	1459	0.942	0.897	16470	0.974
VTA1	-6.99	8	-1.27	0.103	1460	0.942	0.897	16469	0.974
ZNF205	-6.99	8	-1.27	0.103	1461	0.942	0.897	16468	0.974
C8orf59	-3.49	2	-1.27	0.103	1462	0.942	0.897	16467	0.974
TYW5	-6.99	8	-1.27	0.103	1463	0.942	0.897	16466	0.974
TRH	-6.99	8	-1.27	0.103	1464	0.942	0.897	16465	0.974
DPY19L4	-6.99	8	-1.27	0.103	1465	0.942	0.897	16464	0.974
HCK	-6.98	8	-1.27	0.103	1466	0.942	0.897	16463	0.974
ABCA2	-6.98	8	-1.27	0.103	1467	0.942	0.897	16462	0.974
GPS1	-6.98	8	-1.27	0.103	1468	0.942	0.897	16461	0.974
CYB561	-6.98	8	-1.26	0.103	1469	0.942	0.897	16460	0.974
PPM1M	-6.98	8	-1.26	0.103	1470	0.942	0.897	16459	0.974
TSPAN33	-6.98	8	-1.26	0.103	1471	0.942	0.897	16458	0.974
TSPYL1	-6.98	8	-1.26	0.103	1472	0.942	0.897	16457	0.974
KLHL40	-6.98	8	-1.26	0.103	1473	0.942	0.897	16456	0.974
OR4D11	-6.98	8	-1.26	0.103	1474	0.942	0.897	16455	0.974
SLCO4C1	-6.98	8	-1.26	0.103	1475	0.942	0.897	16454	0.974
OR1D2	-6.98	8	-1.26	0.103	1476	0.942	0.897	16453	0.974
ARAP1	-6.97	8	-1.26	0.103	1477	0.942	0.897	16452	0.974
TRIM71	-6.97	8	-1.26	0.103	1478	0.942	0.897	16451	0.974
C2orf50	-6.97	8	-1.26	0.104	1479	0.942	0.896	16450	0.974
AP3S2	-6.03	6	-1.26	0.104	1480	0.942	0.896	16449	0.974
DGKZ	-6.96	8	-1.26	0.104	1481	0.942	0.896	16448	0.974
CDKL3	-6.96	8	-1.26	0.104	1482	0.942	0.896	16447	0.974
OR9K2	-6.96	8	-1.26	0.104	1483	0.942	0.896	16446	0.974
MIEF2	-6.96	8	-1.26	0.104	1484	0.942	0.896	16445	0.974
C5orf49	-6.96	8	-1.26	0.104	1485	0.942	0.896	16444	0.974
AKR1C4	-4.92	4	-1.26	0.104	1486	0.942	0.896	16443	0.974
ZMYND15	-6.95	8	-1.26	0.104	1487	0.942	0.896	16442	0.974
PTPN6	-6.95	8	-1.26	0.104	1488	0.942	0.896	16441	0.974
ALCAM	-6.95	8	-1.26	0.104	1489	0.942	0.896	16440	0.974
GPC2	-6.95	8	-1.26	0.104	1490	0.942	0.896	16439	0.974
PDLIM3	-6.95	8	-1.26	0.104	1491	0.942	0.896	16438	0.974
DDR1	-6.95	8	-1.26	0.104	1492	0.942	0.896	16437	0.974
MINK1	-6.95	8	-1.26	0.104	1493	0.942	0.896	16436	0.974
C6orf120	-6.95	8	-1.26	0.104	1494	0.942	0.896	16435	0.974
ZMYND10	-6.94	8	-1.26	0.105	1495	0.942	0.895	16434	0.974
C15orf41	-6.94	8	-1.25	0.105	1496	0.942	0.895	16433	0.974
PDXK	-6.93	8	-1.25	0.105	1497	0.942	0.895	16432	0.974
SLC6A14	-6.93	8	-1.25	0.105	1498	0.942	0.895	16431	0.974
NR2C2	-6.93	8	-1.25	0.105	1499	0.942	0.895	16430	0.974
NME2	-6	6	-1.25	0.105	1500	0.942	0.895	16429	0.974
ACMSD	-6.93	8	-1.25	0.105	1501	0.942	0.895	16428	0.974
PAGE5	-6.93	8	-1.25	0.105	1502	0.942	0.895	16427	0.974
STEAP2	-6.93	8	-1.25	0.105	1503	0.942	0.895	16426	0.974
LPAR6	-6.93	8	-1.25	0.105	1504	0.942	0.895	16425	0.974
POLR2J2	-3.46	2	-1.25	0.105	1505	0.942	0.895	16424	0.974
DDX43	-6.92	8	-1.25	0.105	1506	0.942	0.895	16423	0.974
SH3KBP1	-6.92	8	-1.25	0.105	1507	0.942	0.895	16422	0.974
SNX29	-6.92	8	-1.25	0.105	1508	0.942	0.895	16421	0.974
FAM47E	-6.92	8	-1.25	0.106	1509	0.942	0.894	16420	0.974
HS3ST3B1	-6.92	8	-1.25	0.106	1510	0.942	0.894	16419	0.974
GTPBP2	-6.91	8	-1.25	0.106	1511	0.942	0.894	16418	0.974
DDX26B	-6.91	8	-1.25	0.106	1512	0.942	0.894	16417	0.974
CDKN2A	-6.91	8	-1.25	0.106	1513	0.942	0.894	16416	0.974
GTF2H1	-6.91	8	-1.25	0.106	1514	0.942	0.894	16415	0.974
HNRNPH3	-6.91	8	-1.25	0.106	1515	0.942	0.894	16414	0.974
TCN1	-6.91	8	-1.25	0.106	1516	0.942	0.894	16413	0.974
RGMB	-6.9	8	-1.25	0.106	1517	0.942	0.894	16412	0.974
CLDN7	-6.9	8	-1.25	0.106	1518	0.942	0.894	16411	0.974
CMTM1	-6.9	8	-1.25	0.106	1519	0.942	0.894	16410	0.974
RNF149	-6.9	8	-1.25	0.106	1520	0.942	0.894	16409	0.974
RELA	-6.9	8	-1.25	0.106	1521	0.942	0.894	16408	0.974
SRD5A3	-6.9	8	-1.25	0.106	1522	0.942	0.894	16407	0.974
ATF7IP	-6.9	8	-1.25	0.106	1523	0.942	0.894	16406	0.974
DCBLD1	-6.9	8	-1.25	0.106	1524	0.942	0.894	16405	0.974
DSN1	-6.9	8	-1.25	0.106	1525	0.942	0.894	16404	0.974
OSR2	-6.9	8	-1.25	0.106	1526	0.942	0.894	16403	0.974
CDK5RAP1	-6.89	8	-1.25	0.106	1527	0.942	0.894	16402	0.974
TBC1D20	-6.89	8	-1.25	0.106	1528	0.942	0.894	16401	0.974
SLC38A2	-6.89	8	-1.25	0.106	1529	0.942	0.894	16400	0.974
IQCF1	-6.89	8	-1.25	0.107	1530	0.942	0.893	16399	0.974
RHD	-6.89	8	-1.24	0.107	1531	0.942	0.893	16398	0.974
MPEG1	-6.89	8	-1.24	0.107	1532	0.942	0.893	16397	0.974
PEX5L	-6.89	8	-1.24	0.107	1533	0.942	0.893	16396	0.974
GEMIN6	-6.89	8	-1.24	0.107	1534	0.942	0.893	16395	0.974
WDR72	-6.88	8	-1.24	0.107	1535	0.942	0.893	16394	0.974
USP9X	-6.88	8	-1.24	0.107	1536	0.942	0.893	16393	0.974
KCNT1	-6.88	8	-1.24	0.107	1537	0.942	0.893	16392	0.974
EPB41L1	-6.87	8	-1.24	0.107	1538	0.942	0.893	16391	0.974
SPPL2C	-6.87	8	-1.24	0.107	1539	0.942	0.893	16390	0.974
OR1A1	-6.87	8	-1.24	0.107	1540	0.942	0.893	16389	0.974
VGLL3	-6.87	8	-1.24	0.107	1541	0.942	0.893	16388	0.974
MZB1	-6.87	8	-1.24	0.107	1542	0.942	0.893	16387	0.974
MLNR	-6.87	8	-1.24	0.108	1543	0.942	0.892	16386	0.974
SUSD3	-6.87	8	-1.24	0.108	1544	0.942	0.892	16385	0.974
GRTP1	-6.86	8	-1.24	0.108	1545	0.942	0.892	16384	0.974
CNBD2	-6.86	8	-1.24	0.108	1546	0.942	0.892	16383	0.974
SEPP1	-6.86	8	-1.24	0.108	1547	0.942	0.892	16382	0.974
SKIV2L2	-6.86	8	-1.24	0.108	1548	0.942	0.892	16381	0.974
MEIS1	-6.86	8	-1.24	0.108	1549	0.942	0.892	16380	0.974
FRMD6	-6.86	8	-1.24	0.108	1550	0.942	0.892	16379	0.974
TRABD2A	-6.86	8	-1.24	0.108	1551	0.942	0.892	16378	0.974
FBLN5	-6.85	8	-1.24	0.108	1552	0.942	0.892	16377	0.974
GALNTL6	-6.85	8	-1.24	0.108	1553	0.942	0.892	16376	0.974
PAPD5	-6.85	8	-1.24	0.108	1554	0.942	0.892	16375	0.974
SWAP70	-6.85	8	-1.24	0.108	1555	0.942	0.892	16374	0.974
RNF146	-6.85	8	-1.24	0.108	1556	0.942	0.892	16373	0.974
ZDHHC5	-6.85	8	-1.24	0.108	1557	0.942	0.892	16372	0.974
DCTN1	-6.85	8	-1.24	0.108	1558	0.942	0.892	16371	0.974
AGPAT4	-6.84	8	-1.23	0.108	1559	0.942	0.892	16370	0.974
NGEF	-6.4	7	-1.23	0.109	1560	0.942	0.891	16369	0.974
SLC16A2	-6.84	8	-1.23	0.109	1561	0.942	0.891	16368	0.974
SIGIRR	-6.83	8	-1.23	0.109	1562	0.942	0.891	16367	0.974
ARHGEF33	-5.92	6	-1.23	0.109	1563	0.942	0.891	16366	0.974
ITIH6	-6.83	8	-1.23	0.109	1564	0.942	0.891	16365	0.974
AK8	-6.83	8	-1.23	0.109	1565	0.942	0.891	16364	0.974
ASCC2	-6.83	8	-1.23	0.109	1566	0.942	0.891	16363	0.974
RPS12	-4.83	4	-1.23	0.109	1567	0.942	0.891	16362	0.974
CSNK2A2	-6.82	8	-1.23	0.109	1568	0.942	0.891	16361	0.974
TLL1	-6.82	8	-1.23	0.109	1569	0.942	0.891	16360	0.974
MB	-6.82	8	-1.23	0.109	1570	0.942	0.891	16359	0.974
SOSTDC1	-6.82	8	-1.23	0.109	1571	0.942	0.891	16358	0.974
ZNF449	-6.82	8	-1.23	0.109	1572	0.942	0.891	16357	0.974
PUM1	-6.82	8	-1.23	0.11	1573	0.942	0.89	16356	0.974
PTGER4	-6.82	8	-1.23	0.11	1574	0.942	0.89	16355	0.974
PUM2	-5.9	6	-1.23	0.11	1575	0.942	0.89	16354	0.974
GALNT14	-6.82	8	-1.23	0.11	1576	0.942	0.89	16353	0.974
SRSF11	-6.81	8	-1.23	0.11	1577	0.942	0.89	16352	0.974
GJB3	-6.81	8	-1.23	0.11	1578	0.942	0.89	16351	0.974
GPR20	-6.8	8	-1.23	0.11	1579	0.942	0.89	16350	0.974
CSNK1A1	-6.8	8	-1.23	0.11	1580	0.942	0.89	16349	0.974
SBSPON	-6.8	8	-1.23	0.11	1581	0.942	0.89	16348	0.974
ATAD3C	-6.8	8	-1.23	0.11	1582	0.942	0.89	16347	0.974
FAM84A	-6.8	8	-1.22	0.11	1583	0.942	0.89	16346	0.974
UMODL1	-6.8	8	-1.22	0.11	1584	0.942	0.89	16345	0.974
RDM1	-6.8	8	-1.22	0.11	1585	0.942	0.89	16344	0.974
SAMD11	-6.79	8	-1.22	0.111	1586	0.942	0.889	16343	0.974
KBTBD4	-5.88	6	-1.22	0.111	1587	0.942	0.889	16342	0.974
GGT5	-6.79	8	-1.22	0.111	1588	0.942	0.889	16341	0.974
RCVRN	-6.79	8	-1.22	0.111	1589	0.942	0.889	16340	0.974
LIMK2	-6.79	8	-1.22	0.111	1590	0.942	0.889	16339	0.974
TBCD	-6.79	8	-1.22	0.111	1591	0.942	0.889	16338	0.974
SLC22A24	-6.79	8	-1.22	0.111	1592	0.942	0.889	16337	0.974
SYNM	-6.79	8	-1.22	0.111	1593	0.942	0.889	16336	0.974
RPRML	-6.79	8	-1.22	0.111	1594	0.942	0.889	16335	0.974
C17orf105	-6.79	8	-1.22	0.111	1595	0.942	0.889	16334	0.974
TK2	-6.78	8	-1.22	0.111	1596	0.942	0.889	16333	0.974
CXorf22	-6.78	8	-1.22	0.111	1597	0.942	0.889	16332	0.974
GZMA	-6.78	8	-1.22	0.111	1598	0.942	0.889	16331	0.974
POR	-6.78	8	-1.22	0.111	1599	0.942	0.889	16330	0.974
YARS2	-6.34	7	-1.22	0.111	1600	0.942	0.889	16329	0.974
GNL3L	-6.78	8	-1.22	0.111	1601	0.942	0.889	16328	0.974
GPR141	-6.77	8	-1.22	0.111	1602	0.942	0.889	16327	0.974
AMN1	-6.77	8	-1.22	0.111	1603	0.942	0.889	16326	0.974
EEF1G	-6.77	8	-1.22	0.111	1604	0.942	0.889	16325	0.974
PPM1D	-6.77	8	-1.22	0.111	1605	0.942	0.889	16324	0.974
AHRR	-6.77	8	-1.22	0.111	1606	0.942	0.889	16323	0.974
KRCC1	-6.77	8	-1.22	0.111	1607	0.942	0.889	16322	0.974
TP53AIP1	-6.77	8	-1.22	0.112	1608	0.942	0.888	16321	0.974
BZRAP1	-6.76	8	-1.22	0.112	1609	0.942	0.888	16320	0.974
CWC22	-6.32	7	-1.22	0.112	1610	0.942	0.888	16319	0.974
C20orf195	-6.76	8	-1.22	0.112	1611	0.942	0.888	16318	0.974
PFKFB1	-6.76	8	-1.22	0.112	1612	0.942	0.888	16317	0.974
NAGS	-6.75	8	-1.21	0.112	1613	0.942	0.888	16316	0.974
SLC9C1	-6.75	8	-1.21	0.112	1614	0.942	0.888	16315	0.974
PCDH1	-6.75	8	-1.21	0.112	1615	0.942	0.888	16314	0.974
C8orf48	-6.75	8	-1.21	0.112	1616	0.942	0.888	16313	0.974
FABP1	-6.75	8	-1.21	0.113	1617	0.942	0.887	16312	0.974
LONP2	-6.75	8	-1.21	0.113	1618	0.942	0.887	16311	0.974
SOGA1	-6.75	8	-1.21	0.113	1619	0.942	0.887	16310	0.974
ALKBH8	-6.74	8	-1.21	0.113	1620	0.942	0.887	16309	0.974
MAST2	-6.74	8	-1.21	0.113	1621	0.942	0.887	16308	0.974
LRRC31	-6.74	8	-1.21	0.113	1622	0.942	0.887	16307	0.974
ITGB3	-6.74	8	-1.21	0.113	1623	0.942	0.887	16306	0.974
DHRS12	-6.73	8	-1.21	0.113	1624	0.942	0.887	16305	0.974
NUDT16	-6.73	8	-1.21	0.113	1625	0.942	0.887	16304	0.974
RFXAP	-6.73	8	-1.21	0.113	1626	0.942	0.887	16303	0.974
PLEKHM1	-6.73	8	-1.21	0.113	1627	0.942	0.887	16302	0.974
SLC35A1	-6.73	8	-1.21	0.113	1628	0.942	0.887	16301	0.974
TSPO	-6.72	8	-1.21	0.114	1629	0.942	0.886	16300	0.974
PMAIP1	-6.72	8	-1.21	0.114	1630	0.942	0.886	16299	0.974
PCDHA13	-6.72	8	-1.21	0.114	1631	0.942	0.886	16298	0.974
HBS1L	-6.72	8	-1.21	0.114	1632	0.942	0.886	16297	0.974
BICD1	-6.71	8	-1.21	0.114	1633	0.942	0.886	16296	0.974
ANKRD33	-6.71	8	-1.2	0.114	1634	0.942	0.886	16295	0.974
GLOD4	-6.71	8	-1.2	0.114	1635	0.942	0.886	16294	0.974
KLHL38	-6.71	8	-1.2	0.114	1636	0.942	0.886	16293	0.974
CCDC154	-6.71	8	-1.2	0.114	1637	0.942	0.886	16292	0.974
HS6ST3	-6.71	8	-1.2	0.114	1638	0.942	0.886	16291	0.974
LGALS9	-4.74	4	-1.2	0.114	1639	0.942	0.886	16290	0.974
ARL14EP	-6.7	8	-1.2	0.114	1640	0.942	0.886	16289	0.974
SSX5	-4.74	4	-1.2	0.114	1641	0.942	0.886	16288	0.974
FAM122B	-6.7	8	-1.2	0.114	1642	0.942	0.886	16287	0.974
MTMR7	-6.7	8	-1.2	0.114	1643	0.942	0.886	16286	0.974
ATP12A	-6.7	8	-1.2	0.115	1644	0.942	0.885	16285	0.974
SLC28A2	-6.7	8	-1.2	0.115	1645	0.942	0.885	16284	0.974
GORASP1	-6.7	8	-1.2	0.115	1646	0.942	0.885	16283	0.974
LSM2	-5.8	6	-1.2	0.115	1647	0.942	0.885	16282	0.974
FABP6	-6.69	8	-1.2	0.115	1648	0.942	0.885	16281	0.974
STON1	-3.35	2	-1.2	0.115	1649	0.942	0.885	16280	0.974
LRRC48	-6.69	8	-1.2	0.115	1650	0.942	0.885	16279	0.974
ZNF782	-6.69	8	-1.2	0.115	1651	0.942	0.885	16278	0.974
NLRP10	-6.69	8	-1.2	0.115	1652	0.942	0.885	16277	0.974
2021-03-03	-6.69	8	-1.2	0.115	1653	0.942	0.885	16276	0.974
GTF3C2	-6.69	8	-1.2	0.115	1654	0.942	0.885	16275	0.974
ADAM11	-6.68	8	-1.2	0.115	1655	0.942	0.885	16274	0.974
PDS5B	-6.68	8	-1.2	0.115	1656	0.942	0.885	16273	0.974
NUDT6	-6.68	8	-1.2	0.115	1657	0.942	0.885	16272	0.974
CD200	-6.68	8	-1.2	0.116	1658	0.942	0.884	16271	0.974
NXF3	-6.68	8	-1.2	0.116	1659	0.942	0.884	16270	0.974
ADAM29	-6.67	8	-1.2	0.116	1660	0.942	0.884	16269	0.974
SP140L	-6.67	8	-1.2	0.116	1661	0.942	0.884	16268	0.974
IGF1	-6.67	8	-1.2	0.116	1662	0.942	0.884	16267	0.974
A1CF	-6.67	8	-1.2	0.116	1663	0.942	0.884	16266	0.974
CCDC96	-6.67	8	-1.2	0.116	1664	0.942	0.884	16265	0.974
IL17B	-6.67	8	-1.2	0.116	1665	0.942	0.884	16264	0.974
SLC2A14	-3.33	2	-1.2	0.116	1666	0.942	0.884	16263	0.974
ABCC1	-6.66	8	-1.19	0.116	1667	0.942	0.884	16262	0.974
GPR119	-6.66	8	-1.19	0.116	1668	0.942	0.884	16261	0.974
CEP41	-6.66	8	-1.19	0.116	1669	0.942	0.884	16260	0.974
TPRG1	-6.66	8	-1.19	0.116	1670	0.942	0.884	16259	0.974
UPB1	-6.66	8	-1.19	0.116	1671	0.942	0.884	16258	0.974
PLA2G1B	-6.66	8	-1.19	0.116	1672	0.942	0.884	16257	0.974
ZNF645	-6.65	8	-1.19	0.116	1673	0.942	0.884	16256	0.974
DMRT2	-6.65	8	-1.19	0.116	1674	0.942	0.884	16255	0.974
FAXDC2	-6.65	8	-1.19	0.117	1675	0.942	0.883	16254	0.974
UGCG	-6.65	8	-1.19	0.117	1676	0.942	0.883	16253	0.974
ARHGEF39	-6.65	8	-1.19	0.117	1677	0.942	0.883	16252	0.974
ANO3	-6.65	8	-1.19	0.117	1678	0.942	0.883	16251	0.974
SYT9	-6.65	8	-1.19	0.117	1679	0.942	0.883	16250	0.974
FST	-6.65	8	-1.19	0.117	1680	0.942	0.883	16249	0.974
ANAPC2	-6.65	8	-1.19	0.117	1681	0.942	0.883	16248	0.974
BTN1A1	-6.64	8	-1.19	0.117	1682	0.942	0.883	16247	0.974
OMG	-6.64	8	-1.19	0.117	1683	0.942	0.883	16246	0.974
UBE2H	-6.64	8	-1.19	0.117	1684	0.942	0.883	16245	0.974
PLOD1	-6.63	8	-1.19	0.117	1685	0.942	0.883	16244	0.974
ARHGAP10	-6.63	8	-1.19	0.117	1686	0.942	0.883	16243	0.974
TUBA8	-6.63	8	-1.19	0.118	1687	0.942	0.882	16242	0.974
PLP2	-6.63	8	-1.19	0.118	1688	0.942	0.882	16241	0.974
B4GALNT1	-6.63	8	-1.19	0.118	1689	0.942	0.882	16240	0.974
GRB14	-6.63	8	-1.19	0.118	1690	0.942	0.882	16239	0.974
SHROOM3	-6.63	8	-1.19	0.118	1691	0.942	0.882	16238	0.974
HSPA13	-6.62	8	-1.19	0.118	1692	0.942	0.882	16237	0.974
HOXB4	-6.62	8	-1.19	0.118	1693	0.942	0.882	16236	0.974
KCNU1	-6.62	8	-1.19	0.118	1694	0.942	0.882	16235	0.974
RAB40A	-4.68	4	-1.18	0.118	1695	0.942	0.882	16234	0.974
CHST1	-6.62	8	-1.18	0.118	1696	0.942	0.882	16233	0.974
PTRH2	-6.62	8	-1.18	0.118	1697	0.942	0.882	16232	0.974
AK3	-6.62	8	-1.18	0.118	1698	0.942	0.882	16231	0.974
AKIRIN1	-6.62	8	-1.18	0.118	1699	0.942	0.882	16230	0.974
KCND2	-6.62	8	-1.18	0.118	1700	0.942	0.882	16229	0.974
KBTBD7	-6.62	8	-1.18	0.118	1701	0.942	0.882	16228	0.974
COX7B2	-6.62	8	-1.18	0.118	1702	0.942	0.882	16227	0.974
DRD5	-6.61	8	-1.18	0.118	1703	0.942	0.882	16226	0.974
CLIP2	-6.61	8	-1.18	0.118	1704	0.942	0.882	16225	0.974
SCRT2	-6.61	8	-1.18	0.118	1705	0.942	0.882	16224	0.974
SMIM6	-6.61	8	-1.18	0.118	1706	0.942	0.882	16223	0.974
PHPT1	-6.61	8	-1.18	0.118	1707	0.942	0.882	16222	0.974
SMIM5	-6.61	8	-1.18	0.118	1708	0.942	0.882	16221	0.974
BTBD10	-6.61	8	-1.18	0.119	1709	0.942	0.881	16220	0.974
LARS	-5.72	6	-1.18	0.119	1710	0.942	0.881	16219	0.974
A4GNT	-6.61	8	-1.18	0.119	1711	0.942	0.881	16218	0.974
SH3BP1	-6.6	8	-1.18	0.119	1712	0.942	0.881	16217	0.974
SLC7A4	-6.6	8	-1.18	0.119	1713	0.942	0.881	16216	0.974
IRF9	-6.6	8	-1.18	0.119	1714	0.942	0.881	16215	0.974
HNRNPA2B1	-6.6	8	-1.18	0.119	1715	0.942	0.881	16214	0.974
CHST4	-6.6	8	-1.18	0.119	1716	0.942	0.881	16213	0.974
COL18A1	-6.59	8	-1.18	0.119	1717	0.942	0.881	16212	0.974
PAK1IP1	-5.71	6	-1.18	0.119	1718	0.942	0.881	16211	0.974
SYTL3	-6.59	8	-1.18	0.119	1719	0.942	0.881	16210	0.974
FAM3D	-6.59	8	-1.18	0.119	1720	0.942	0.881	16209	0.974
SF3B2	-5.71	6	-1.18	0.119	1721	0.942	0.881	16208	0.974
AMACR	-6.59	8	-1.18	0.119	1722	0.942	0.881	16207	0.974
RAB34	-6.59	8	-1.18	0.119	1723	0.942	0.881	16206	0.974
OR2M4	-6.59	8	-1.18	0.119	1724	0.942	0.881	16205	0.974
FCF1	-4.66	4	-1.18	0.119	1725	0.942	0.881	16204	0.974
IQCF2	-6.59	8	-1.18	0.119	1726	0.942	0.881	16203	0.974
C8orf58	-6.59	8	-1.18	0.119	1727	0.942	0.881	16202	0.974
KLHL21	-6.58	8	-1.18	0.12	1728	0.942	0.88	16201	0.974
NCR2	-6.58	8	-1.18	0.12	1729	0.942	0.88	16200	0.974
ARL16	-6.58	8	-1.18	0.12	1730	0.942	0.88	16199	0.974
RAB26	-6.58	8	-1.18	0.12	1731	0.942	0.88	16198	0.974
HOPX	-6.58	8	-1.18	0.12	1732	0.942	0.88	16197	0.974
TMED9	-6.58	8	-1.18	0.12	1733	0.942	0.88	16196	0.974
DHRS7B	-6.58	8	-1.18	0.12	1734	0.942	0.88	16195	0.974
BCL2	-6.57	8	-1.18	0.12	1735	0.942	0.88	16194	0.974
C22orf15	-6.57	8	-1.18	0.12	1736	0.942	0.88	16193	0.974
ZNF300	-6.57	8	-1.17	0.12	1737	0.942	0.88	16192	0.974
OR52K2	-6.57	8	-1.17	0.12	1738	0.942	0.88	16191	0.974
RASD1	-6.57	8	-1.17	0.12	1739	0.942	0.88	16190	0.974
TMEM25	-6.57	8	-1.17	0.12	1740	0.942	0.88	16189	0.974
C11orf35	-6.57	8	-1.17	0.12	1741	0.942	0.88	16188	0.974
PON3	-6.57	8	-1.17	0.12	1742	0.942	0.88	16187	0.974
GABRA2	-6.57	8	-1.17	0.12	1743	0.942	0.88	16186	0.974
TMEM192	-6.57	8	-1.17	0.12	1744	0.942	0.88	16185	0.974
SLC6A11	-6.57	8	-1.17	0.12	1745	0.942	0.88	16184	0.974
C1QTNF3	-6.56	8	-1.17	0.12	1746	0.942	0.88	16183	0.974
KCNB2	-6.56	8	-1.17	0.12	1747	0.942	0.88	16182	0.974
SLC39A4	-6.56	8	-1.17	0.121	1748	0.942	0.879	16181	0.974
CNOT6L	-6.56	8	-1.17	0.121	1749	0.942	0.879	16180	0.974
HECW2	-6.56	8	-1.17	0.121	1750	0.942	0.879	16179	0.974
CYS1	-6.56	8	-1.17	0.121	1751	0.942	0.879	16178	0.974
MCOLN2	-6.56	8	-1.17	0.121	1752	0.942	0.879	16177	0.974
CCR4	-6.56	8	-1.17	0.121	1753	0.942	0.879	16176	0.974
B3GALT5	-6.55	8	-1.17	0.121	1754	0.942	0.879	16175	0.974
IMPA2	-6.55	8	-1.17	0.121	1755	0.942	0.879	16174	0.974
ZFAND1	-6.55	8	-1.17	0.121	1756	0.942	0.879	16173	0.974
HELLS	-6.55	8	-1.17	0.121	1757	0.942	0.879	16172	0.974
MLLT3	-6.54	8	-1.17	0.121	1758	0.942	0.879	16171	0.974
MLF1IP	-6.54	8	-1.17	0.121	1759	0.942	0.879	16170	0.974
JPH1	-6.54	8	-1.17	0.122	1760	0.942	0.878	16169	0.974
C16orf71	-6.54	8	-1.17	0.122	1761	0.942	0.878	16168	0.974
PHYHD1	-6.54	8	-1.17	0.122	1762	0.942	0.878	16167	0.974
FABP4	-6.53	8	-1.17	0.122	1763	0.942	0.878	16166	0.974
SLC39A13	-6.53	8	-1.17	0.122	1764	0.942	0.878	16165	0.974
PDHX	-6.53	8	-1.17	0.122	1765	0.942	0.878	16164	0.974
UTP14A	-6.53	8	-1.17	0.122	1766	0.942	0.878	16163	0.974
KIT	-6.53	8	-1.17	0.122	1767	0.942	0.878	16162	0.974
ACTR3B	-6.53	8	-1.16	0.122	1768	0.942	0.878	16161	0.974
TMEM179	-6.53	8	-1.16	0.122	1769	0.942	0.878	16160	0.974
CGGBP1	-6.53	8	-1.16	0.122	1770	0.942	0.878	16159	0.974
RAP1GAP	-6.53	8	-1.16	0.122	1771	0.942	0.878	16158	0.974
SPDYA	-6.52	8	-1.16	0.122	1772	0.942	0.878	16157	0.974
DDX10	-6.1	7	-1.16	0.122	1773	0.942	0.878	16156	0.974
TUBGCP3	-6.52	8	-1.16	0.122	1774	0.942	0.878	16155	0.974
DHCR24	-6.52	8	-1.16	0.122	1775	0.942	0.878	16154	0.974
PARP14	-6.52	8	-1.16	0.122	1776	0.942	0.878	16153	0.974
C17orf74	-6.52	8	-1.16	0.122	1777	0.942	0.878	16152	0.974
LUZP2	-6.52	8	-1.16	0.122	1778	0.942	0.878	16151	0.974
COL6A3	-6.52	8	-1.16	0.123	1779	0.942	0.877	16150	0.974
ZNF600	-6.52	8	-1.16	0.123	1780	0.942	0.877	16149	0.974
CECR6	-6.51	8	-1.16	0.123	1781	0.942	0.877	16148	0.974
TRMT11	-6.51	8	-1.16	0.123	1782	0.942	0.877	16147	0.974
HOXB8	-6.51	8	-1.16	0.123	1783	0.942	0.877	16146	0.974
ANKRD36	-4.6	4	-1.16	0.123	1784	0.942	0.877	16145	0.974
HTR1A	-6.51	8	-1.16	0.123	1785	0.942	0.877	16144	0.974
MMD2	-6.51	8	-1.16	0.123	1786	0.942	0.877	16143	0.974
ACOT8	-6.51	8	-1.16	0.123	1787	0.942	0.877	16142	0.974
CYP2U1	-6.51	8	-1.16	0.123	1788	0.942	0.877	16141	0.974
RNF213	-6.51	8	-1.16	0.123	1789	0.942	0.877	16140	0.974
SH3BGRL2	-6.51	8	-1.16	0.123	1790	0.942	0.877	16139	0.974
SARDH	-6.5	8	-1.16	0.123	1791	0.942	0.877	16138	0.974
AJAP1	-6.5	8	-1.16	0.123	1792	0.942	0.877	16137	0.974
KAT7	-6.5	8	-1.16	0.123	1793	0.942	0.877	16136	0.974
N6AMT2	-6.5	8	-1.16	0.123	1794	0.942	0.877	16135	0.974
ADAM23	-6.5	8	-1.16	0.123	1795	0.942	0.877	16134	0.974
KLHL9	-6.5	8	-1.16	0.123	1796	0.942	0.877	16133	0.974
MPZL2	-6.5	8	-1.16	0.123	1797	0.942	0.877	16132	0.974
SKAP1	-6.5	8	-1.16	0.123	1798	0.942	0.877	16131	0.974
PEG10	-6.5	8	-1.16	0.123	1799	0.942	0.877	16130	0.974
DPF3	-6.5	8	-1.16	0.123	1800	0.942	0.877	16129	0.974
HCFC1	-6.5	8	-1.16	0.123	1801	0.942	0.877	16128	0.974
TBKBP1	-6.5	8	-1.16	0.123	1802	0.942	0.877	16127	0.974
SFSWAP	-6.49	8	-1.16	0.123	1803	0.942	0.877	16126	0.974
PCDHB16	-6.49	8	-1.16	0.123	1804	0.942	0.877	16125	0.974
STAC2	-6.49	8	-1.16	0.124	1805	0.942	0.876	16124	0.974
ITFG3	-6.49	8	-1.16	0.124	1806	0.942	0.876	16123	0.974
MS4A3	-6.49	8	-1.16	0.124	1807	0.942	0.876	16122	0.974
SCARA3	-6.49	8	-1.16	0.124	1808	0.942	0.876	16121	0.974
EIF2S3L	-6.49	8	-1.16	0.124	1809	0.942	0.876	16120	0.974
ATE1	-6.49	8	-1.16	0.124	1810	0.942	0.876	16119	0.974
KRBA2	-6.49	8	-1.16	0.124	1811	0.942	0.876	16118	0.974
ENO4	-6.49	8	-1.16	0.124	1812	0.942	0.876	16117	0.974
OTUB1	-6.49	8	-1.16	0.124	1813	0.942	0.876	16116	0.974
ING1	-6.49	8	-1.16	0.124	1814	0.942	0.876	16115	0.974
CENPO	-6.48	8	-1.16	0.124	1815	0.942	0.876	16114	0.974
NXPH1	-6.48	8	-1.15	0.124	1816	0.942	0.876	16113	0.974
ARHGAP27	-6.48	8	-1.15	0.124	1817	0.942	0.876	16112	0.974
SDC1	-6.48	8	-1.15	0.124	1818	0.942	0.876	16111	0.974
SNX22	-6.48	8	-1.15	0.124	1819	0.942	0.876	16110	0.974
SELO	-6.48	8	-1.15	0.124	1820	0.942	0.876	16109	0.974
GFAP	-6.48	8	-1.15	0.124	1821	0.942	0.876	16108	0.974
KCTD21	-6.48	8	-1.15	0.124	1822	0.942	0.876	16107	0.974
DFFA	-6.48	8	-1.15	0.124	1823	0.942	0.876	16106	0.974
CAND1	-6.48	8	-1.15	0.124	1824	0.942	0.876	16105	0.974
IFT57	-6.47	8	-1.15	0.124	1825	0.942	0.876	16104	0.974
SETMAR	-6.47	8	-1.15	0.125	1826	0.942	0.875	16103	0.974
RBMXL2	-6.47	8	-1.15	0.125	1827	0.942	0.875	16102	0.974
GLG1	-6.47	8	-1.15	0.125	1828	0.942	0.875	16101	0.974
ZNF519	-3.23	2	-1.15	0.125	1829	0.942	0.875	16100	0.974
TMEM179B	-6.46	8	-1.15	0.125	1830	0.942	0.875	16099	0.974
TMEM92	-6.46	8	-1.15	0.125	1831	0.942	0.875	16098	0.974
GCKR	-6.46	8	-1.15	0.125	1832	0.942	0.875	16097	0.974
SBF1	-6.46	8	-1.15	0.125	1833	0.942	0.875	16096	0.974
CHD2	-6.46	8	-1.15	0.125	1834	0.942	0.875	16095	0.974
ZFPM2	-6.46	8	-1.15	0.125	1835	0.942	0.875	16094	0.974
TBC1D31	-6.45	8	-1.15	0.125	1836	0.942	0.875	16093	0.974
ENTPD6	-6.45	8	-1.15	0.125	1837	0.942	0.875	16092	0.974
WDR52	-6.45	8	-1.15	0.126	1838	0.942	0.874	16091	0.974
XRCC6	-6.44	8	-1.15	0.126	1839	0.942	0.874	16090	0.974
HEY1	-6.44	8	-1.15	0.126	1840	0.942	0.874	16089	0.974
YWHAB	-6.44	8	-1.15	0.126	1841	0.942	0.874	16088	0.974
ISM1	-6.44	8	-1.15	0.126	1842	0.942	0.874	16087	0.974
PRR14L	-6.44	8	-1.15	0.126	1843	0.942	0.874	16086	0.974
PCNP	-5.57	6	-1.14	0.126	1844	0.942	0.874	16085	0.974
STRC	-6.44	8	-1.14	0.126	1845	0.942	0.874	16084	0.974
ACKR2	-6.44	8	-1.14	0.126	1846	0.942	0.874	16083	0.974
C6orf226	-6.44	8	-1.14	0.126	1847	0.942	0.874	16082	0.974
CD207	-6.44	8	-1.14	0.126	1848	0.942	0.874	16081	0.974
STH	-6.43	8	-1.14	0.126	1849	0.942	0.874	16080	0.974
TRUB1	-5.57	6	-1.14	0.126	1850	0.942	0.874	16079	0.974
PCYOX1	-6.43	8	-1.14	0.126	1851	0.942	0.874	16078	0.974
STAMBP	-6.43	8	-1.14	0.126	1852	0.942	0.874	16077	0.974
ARID5A	-6.43	8	-1.14	0.127	1853	0.942	0.873	16076	0.974
TAOK3	-6.43	8	-1.14	0.127	1854	0.942	0.873	16075	0.974
CLEC14A	-6.42	8	-1.14	0.127	1855	0.942	0.873	16074	0.974
CRLF3	-6.42	8	-1.14	0.127	1856	0.942	0.873	16073	0.974
EDA2R	-6.42	8	-1.14	0.127	1857	0.942	0.873	16072	0.974
OXTR	-6.42	8	-1.14	0.127	1858	0.942	0.873	16071	0.974
SOX7	-6.42	8	-1.14	0.127	1859	0.942	0.873	16070	0.974
MKLN1	-6.42	8	-1.14	0.127	1860	0.942	0.873	16069	0.974
PTBP1	-6.42	8	-1.14	0.127	1861	0.942	0.873	16068	0.974
CALD1	-6.42	8	-1.14	0.127	1862	0.942	0.873	16067	0.974
GP2	-6.42	8	-1.14	0.127	1863	0.942	0.873	16066	0.974
PNP	-6.42	8	-1.14	0.127	1864	0.942	0.873	16065	0.974
LRIG3	-6.42	8	-1.14	0.127	1865	0.942	0.873	16064	0.974
MAMDC2	-6.41	8	-1.14	0.127	1866	0.942	0.873	16063	0.974
SLC16A10	-6.41	8	-1.14	0.127	1867	0.942	0.873	16062	0.974
KRT23	-6.41	8	-1.14	0.127	1868	0.942	0.873	16061	0.974
VSTM5	-6.41	8	-1.14	0.127	1869	0.942	0.873	16060	0.974
RNF167	-6.41	8	-1.14	0.127	1870	0.942	0.873	16059	0.974
FAM96A	-6.41	8	-1.14	0.127	1871	0.942	0.873	16058	0.974
IFITM2	-5.55	6	-1.14	0.127	1872	0.942	0.873	16057	0.974
ATP5H	-6.41	8	-1.14	0.127	1873	0.942	0.873	16056	0.974
LYPD6	-6.4	8	-1.14	0.128	1874	0.942	0.872	16055	0.974
NUDT5	-6.4	8	-1.14	0.128	1875	0.942	0.872	16054	0.974
PMCH	-5.54	6	-1.14	0.128	1876	0.942	0.872	16053	0.974
CNNM3	-5.99	7	-1.14	0.128	1877	0.942	0.872	16052	0.974
SLC7A6	-6.4	8	-1.14	0.128	1878	0.942	0.872	16051	0.974
TBX10	-6.4	8	-1.14	0.128	1879	0.942	0.872	16050	0.974
IRX6	-6.4	8	-1.14	0.128	1880	0.942	0.872	16049	0.974
MOV10	-6.4	8	-1.14	0.128	1881	0.942	0.872	16048	0.974
SLC20A2	-6.4	8	-1.14	0.128	1882	0.942	0.872	16047	0.974
MUTYH	-6.4	8	-1.14	0.128	1883	0.942	0.872	16046	0.974
ABI1	-6.39	8	-1.14	0.128	1884	0.942	0.872	16045	0.974
TMEM14C	-4.52	4	-1.14	0.128	1885	0.942	0.872	16044	0.974
EMC8	-6.39	8	-1.14	0.128	1886	0.942	0.872	16043	0.974
PHKA1	-6.39	8	-1.14	0.128	1887	0.942	0.872	16042	0.974
HOXB9	-6.39	8	-1.14	0.128	1888	0.942	0.872	16041	0.974
CDC42EP2	-6.39	8	-1.14	0.128	1889	0.942	0.872	16040	0.974
SPATA24	-6.39	8	-1.13	0.128	1890	0.942	0.872	16039	0.974
WWP2	-6.39	8	-1.13	0.128	1891	0.942	0.872	16038	0.974
POLD2	-6.39	8	-1.13	0.128	1892	0.942	0.872	16037	0.974
SOX17	-6.39	8	-1.13	0.128	1893	0.942	0.872	16036	0.974
CLIP1	-6.39	8	-1.13	0.128	1894	0.942	0.872	16035	0.974
OCRL	-6.39	8	-1.13	0.128	1895	0.942	0.872	16034	0.974
TYR	-6.38	8	-1.13	0.128	1896	0.942	0.872	16033	0.974
HPGD	-6.38	8	-1.13	0.129	1897	0.942	0.871	16032	0.974
NFKB2	-6.38	8	-1.13	0.129	1898	0.942	0.871	16031	0.974
SERPINA7	-6.38	8	-1.13	0.129	1899	0.942	0.871	16030	0.974
PPP1R10	-6.38	8	-1.13	0.129	1900	0.942	0.871	16029	0.974
PCDHGA3	-6.38	8	-1.13	0.129	1901	0.942	0.871	16028	0.974
PA2G4	-6.38	8	-1.13	0.129	1902	0.942	0.871	16027	0.974
TLX2	-6.38	8	-1.13	0.129	1903	0.942	0.871	16026	0.974
GLYR1	-6.38	8	-1.13	0.129	1904	0.942	0.871	16025	0.974
FAP	-6.38	8	-1.13	0.129	1905	0.942	0.871	16024	0.974
PTEN	-6.38	8	-1.13	0.129	1906	0.942	0.871	16023	0.974
PDK2	-6.38	8	-1.13	0.129	1907	0.942	0.871	16022	0.974
PCYT2	-6.38	8	-1.13	0.129	1908	0.942	0.871	16021	0.974
AOAH	-6.37	8	-1.13	0.129	1909	0.942	0.871	16020	0.974
C10orf71	-6.37	8	-1.13	0.129	1910	0.942	0.871	16019	0.974
MNX1	-6.37	8	-1.13	0.129	1911	0.942	0.871	16018	0.974
OR10A7	-6.37	8	-1.13	0.129	1912	0.942	0.871	16017	0.974
TMEM219	-6.37	8	-1.13	0.129	1913	0.942	0.871	16016	0.974
FAM73A	-6.37	8	-1.13	0.129	1914	0.942	0.871	16015	0.974
UNC13B	-6.37	8	-1.13	0.129	1915	0.942	0.871	16014	0.974
C17orf67	-6.37	8	-1.13	0.129	1916	0.942	0.871	16013	0.974
FAM132A	-6.37	8	-1.13	0.129	1917	0.942	0.871	16012	0.974
ACSF2	-6.37	8	-1.13	0.129	1918	0.942	0.871	16011	0.974
ITM2B	-6.37	8	-1.13	0.129	1919	0.942	0.871	16010	0.974
KRT33B	-6.36	8	-1.13	0.129	1920	0.942	0.871	16009	0.974
LIME1	-6.36	8	-1.13	0.13	1921	0.942	0.87	16008	0.974
PMS1	-6.36	8	-1.13	0.13	1922	0.942	0.87	16007	0.974
NUP85	-5.95	7	-1.13	0.13	1923	0.942	0.87	16006	0.974
TMIGD1	-6.36	8	-1.13	0.13	1924	0.942	0.87	16005	0.974
PRKAR2A	-6.36	8	-1.13	0.13	1925	0.942	0.87	16004	0.974
NMRK1	-6.36	8	-1.13	0.13	1926	0.942	0.87	16003	0.974
HPSE	-6.36	8	-1.13	0.13	1927	0.942	0.87	16002	0.974
IL1R2	-6.36	8	-1.13	0.13	1928	0.942	0.87	16001	0.974
RNF43	-6.36	8	-1.13	0.13	1929	0.942	0.87	16000	0.974
QPCT	-6.36	8	-1.13	0.13	1930	0.942	0.87	15999	0.974
GPRIN3	-6.36	8	-1.13	0.13	1931	0.942	0.87	15998	0.974
FGF20	-6.35	8	-1.13	0.13	1932	0.942	0.87	15997	0.974
TPST2	-6.35	8	-1.13	0.13	1933	0.942	0.87	15996	0.974
STRN3	-6.35	8	-1.13	0.13	1934	0.942	0.87	15995	0.974
GIF	-6.35	8	-1.13	0.13	1935	0.942	0.87	15994	0.974
LCE3C	-6.35	8	-1.13	0.13	1936	0.942	0.87	15993	0.974
UBQLN3	-6.34	8	-1.12	0.13	1937	0.942	0.87	15992	0.974
MMP11	-6.34	8	-1.12	0.13	1938	0.942	0.87	15991	0.974
ABCC2	-6.34	8	-1.12	0.13	1939	0.942	0.87	15990	0.974
TMEM132C	-6.34	8	-1.12	0.13	1940	0.942	0.87	15989	0.974
SSTR4	-6.34	8	-1.12	0.13	1941	0.942	0.87	15988	0.974
NRROS	-6.34	8	-1.12	0.13	1942	0.942	0.87	15987	0.974
OR5V1	-6.34	8	-1.12	0.13	1943	0.942	0.87	15986	0.974
TRIP11	-6.34	8	-1.12	0.131	1944	0.942	0.869	15985	0.974
BUB1	-6.34	8	-1.12	0.131	1945	0.942	0.869	15984	0.974
MLTK	-6.33	8	-1.12	0.131	1946	0.942	0.869	15983	0.974
CALU	-6.33	8	-1.12	0.131	1947	0.942	0.869	15982	0.974
FBXO36	-6.33	8	-1.12	0.131	1948	0.942	0.869	15981	0.974
ERBB3	-6.33	8	-1.12	0.131	1949	0.942	0.869	15980	0.974
NXT2	-6.33	8	-1.12	0.131	1950	0.942	0.869	15979	0.974
CYP2D6	-6.33	8	-1.12	0.131	1951	0.942	0.869	15978	0.974
MCC	-6.33	8	-1.12	0.131	1952	0.942	0.869	15977	0.974
AK5	-6.32	8	-1.12	0.131	1953	0.942	0.869	15976	0.974
CADM1	-5.48	6	-1.12	0.131	1954	0.942	0.869	15975	0.974
AREL1	-6.32	8	-1.12	0.131	1955	0.942	0.869	15974	0.974
P2RX3	-6.32	8	-1.12	0.131	1956	0.942	0.869	15973	0.974
AP2B1	-6.32	8	-1.12	0.131	1957	0.942	0.869	15972	0.974
MCM8	-6.32	8	-1.12	0.131	1958	0.942	0.869	15971	0.974
TPH1	-6.32	8	-1.12	0.131	1959	0.942	0.869	15970	0.974
SLC15A1	-6.32	8	-1.12	0.132	1960	0.942	0.868	15969	0.974
F12	-6.32	8	-1.12	0.132	1961	0.942	0.868	15968	0.974
GALK2	-6.32	8	-1.12	0.132	1962	0.942	0.868	15967	0.974
UCHL3	-6.32	8	-1.12	0.132	1963	0.942	0.868	15966	0.974
PKIG	-6.32	8	-1.12	0.132	1964	0.942	0.868	15965	0.974
PDE9A	-6.32	8	-1.12	0.132	1965	0.942	0.868	15964	0.974
NT5C3A	-6.32	8	-1.12	0.132	1966	0.942	0.868	15963	0.974
HES6	-6.32	8	-1.12	0.132	1967	0.942	0.868	15962	0.974
COLEC11	-6.31	8	-1.12	0.132	1968	0.942	0.868	15961	0.974
DNAL4	-6.31	8	-1.12	0.132	1969	0.942	0.868	15960	0.974
RASSF1	-6.31	8	-1.12	0.132	1970	0.942	0.868	15959	0.974
KCNG3	-6.31	8	-1.12	0.132	1971	0.942	0.868	15958	0.974
MFAP4	-6.31	8	-1.12	0.132	1972	0.942	0.868	15957	0.974
FEV	-6.31	8	-1.12	0.132	1973	0.942	0.868	15956	0.974
GTF2F1	-6.31	8	-1.12	0.132	1974	0.942	0.868	15955	0.974
HOXC13	-5.46	6	-1.12	0.132	1975	0.942	0.868	15954	0.974
ALOX12B	-6.31	8	-1.12	0.132	1976	0.942	0.868	15953	0.974
LRRC9	-6.31	8	-1.12	0.132	1977	0.942	0.868	15952	0.974
KRT19	-6.3	8	-1.12	0.132	1978	0.942	0.868	15951	0.974
AP5S1	-6.3	8	-1.12	0.132	1979	0.942	0.868	15950	0.974
ALKBH5	-6.3	8	-1.12	0.132	1980	0.942	0.868	15949	0.974
TRIM65	-6.3	8	-1.12	0.132	1981	0.942	0.868	15948	0.974
OR2T1	-6.3	8	-1.12	0.132	1982	0.942	0.868	15947	0.974
MFI2	-6.3	8	-1.11	0.132	1983	0.942	0.868	15946	0.974
DCAF8L2	-6.3	8	-1.11	0.132	1984	0.942	0.868	15945	0.974
KRT38	-6.3	8	-1.11	0.132	1985	0.942	0.868	15944	0.974
APCDD1L	-6.3	8	-1.11	0.132	1986	0.942	0.868	15943	0.974
AMIGO2	-6.3	8	-1.11	0.133	1987	0.942	0.867	15942	0.974
POF1B	-6.3	8	-1.11	0.133	1988	0.942	0.867	15941	0.974
SFXN1	-6.3	8	-1.11	0.133	1989	0.942	0.867	15940	0.974
ACTRT1	-6.3	8	-1.11	0.133	1990	0.942	0.867	15939	0.974
SERBP1	-6.3	8	-1.11	0.133	1991	0.942	0.867	15938	0.974
TECTA	-6.29	8	-1.11	0.133	1992	0.942	0.867	15937	0.974
RAP2C	-6.29	8	-1.11	0.133	1993	0.942	0.867	15936	0.974
ADK	-6.29	8	-1.11	0.133	1994	0.942	0.867	15935	0.974
MALT1	-6.29	8	-1.11	0.133	1995	0.942	0.867	15934	0.974
RUNX1T1	-6.29	8	-1.11	0.133	1996	0.942	0.867	15933	0.974
TMEM57	-6.29	8	-1.11	0.133	1997	0.942	0.867	15932	0.974
EFHC1	-6.29	8	-1.11	0.133	1998	0.942	0.867	15931	0.974
MAPK3	-6.29	8	-1.11	0.133	1999	0.942	0.867	15930	0.974
[truncated: 15,929 more rows]
