# Supplementary figures and images for: DePARylation is critical for S phase progression and cell survival
Source: eLife journal article supplement (doi:10.7554/elife.89303), 2023-09-28

B

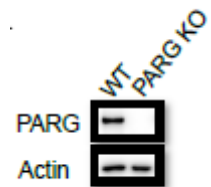

D

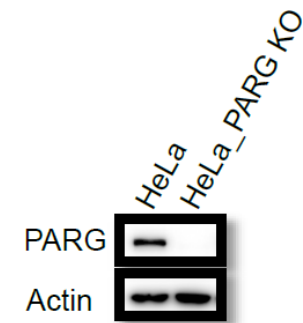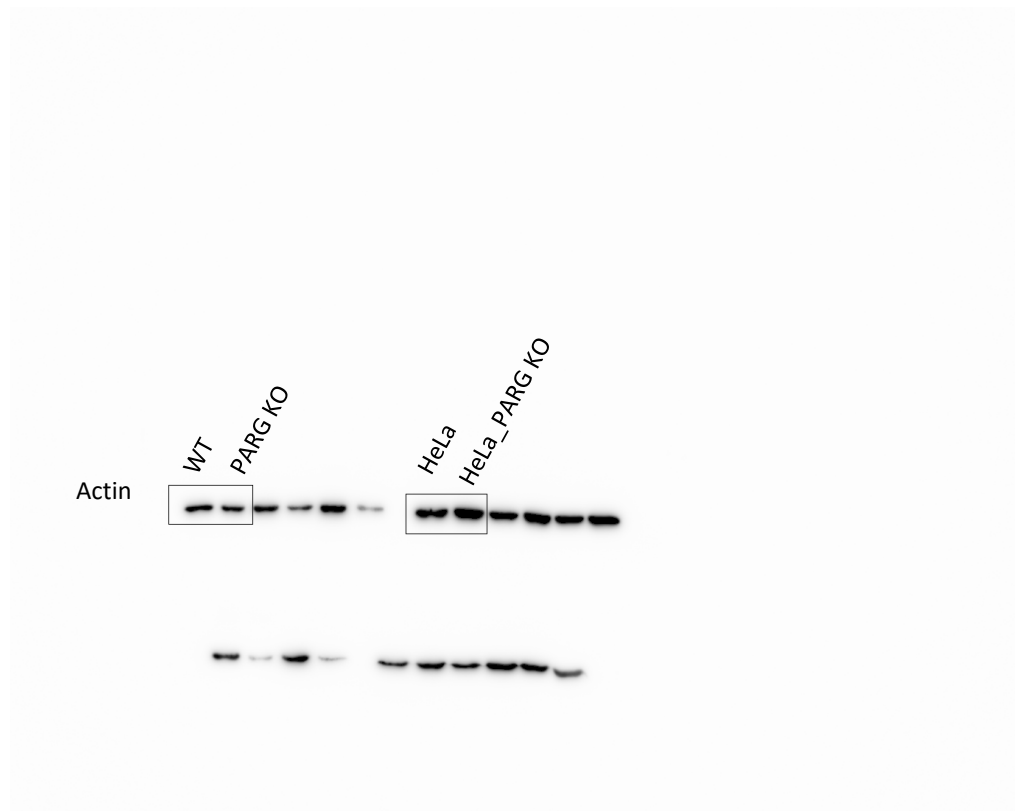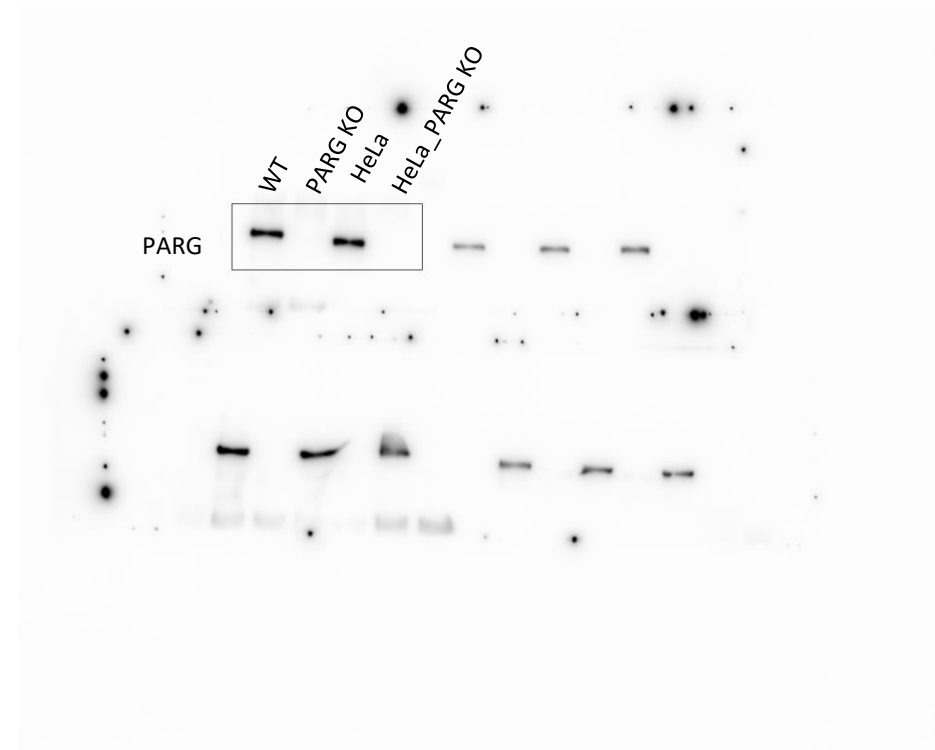

Figure 1 & Figure 1-figure supplement 1

Supplement: fig1-data3 [file elife-89303-fig1-data3-v1.zip]

A

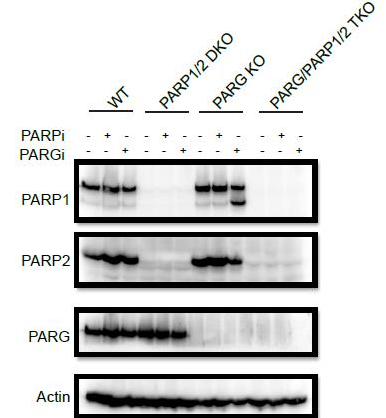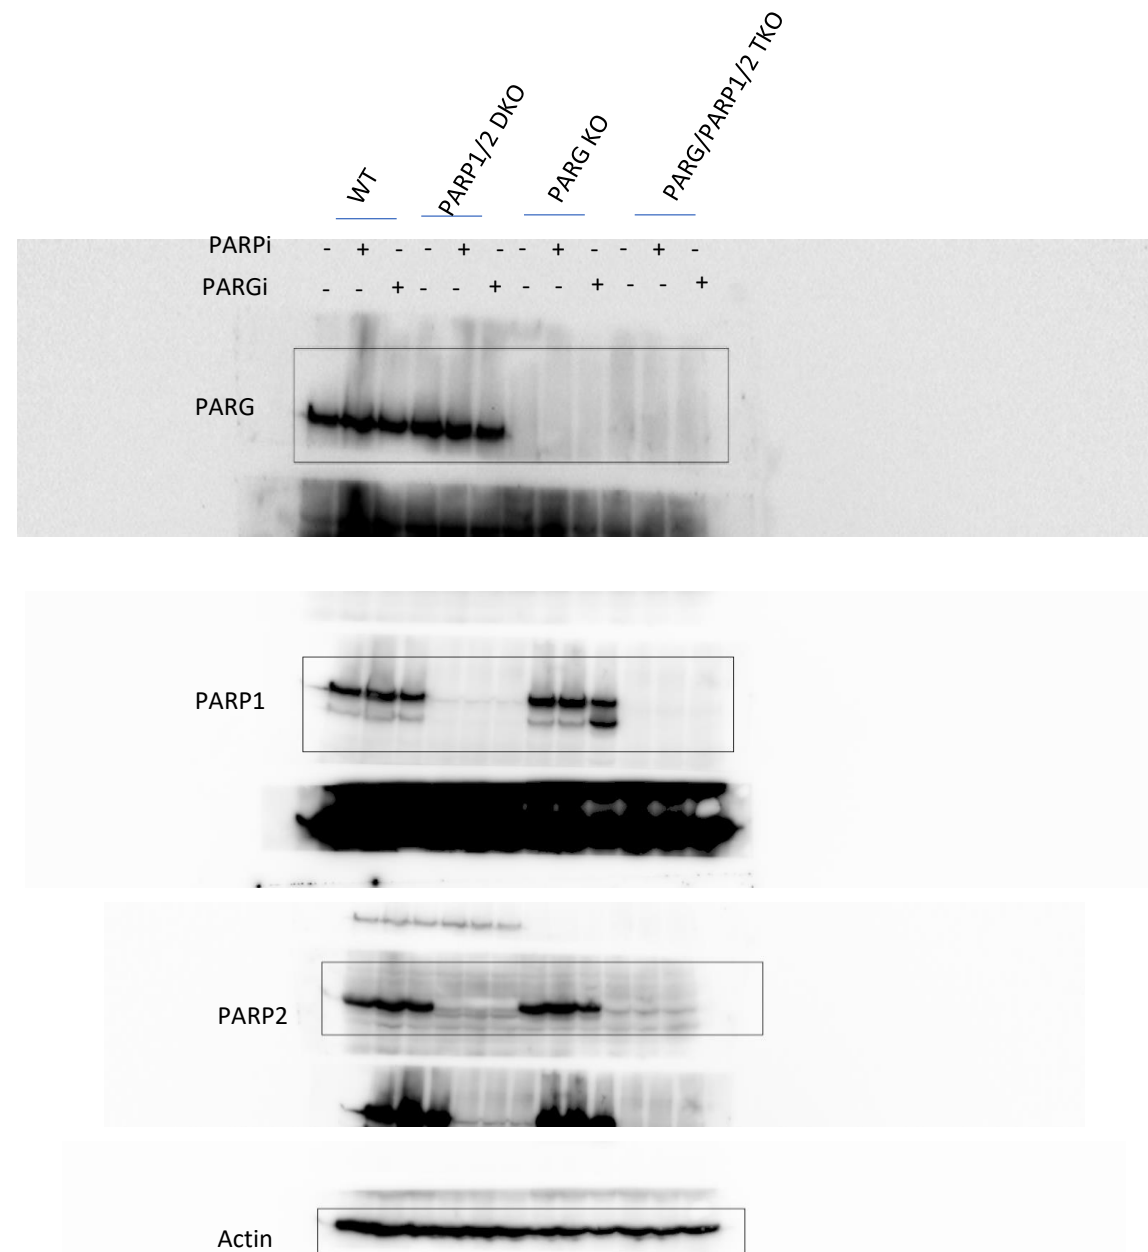

Figure 2

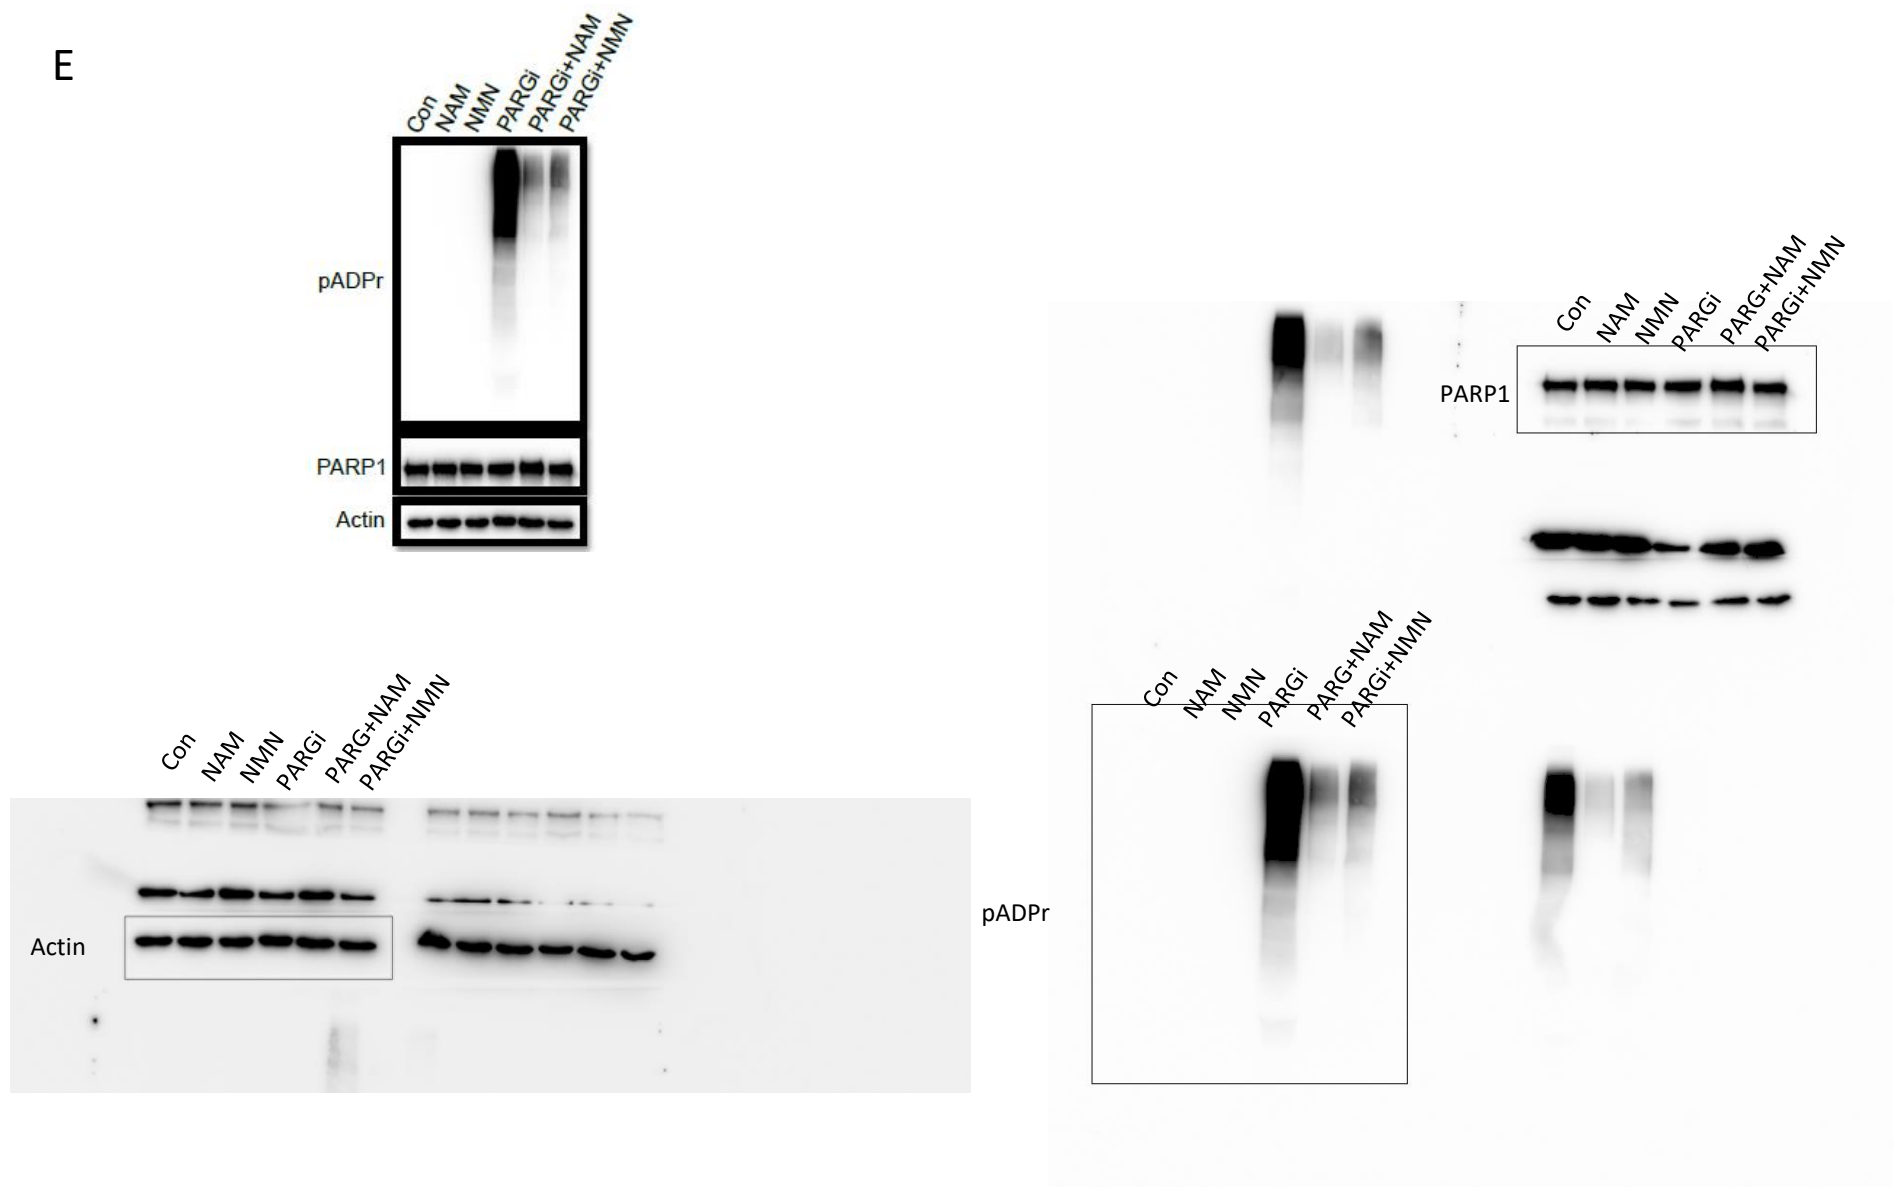

Figure 2

F

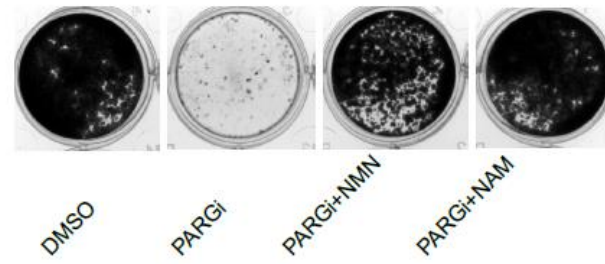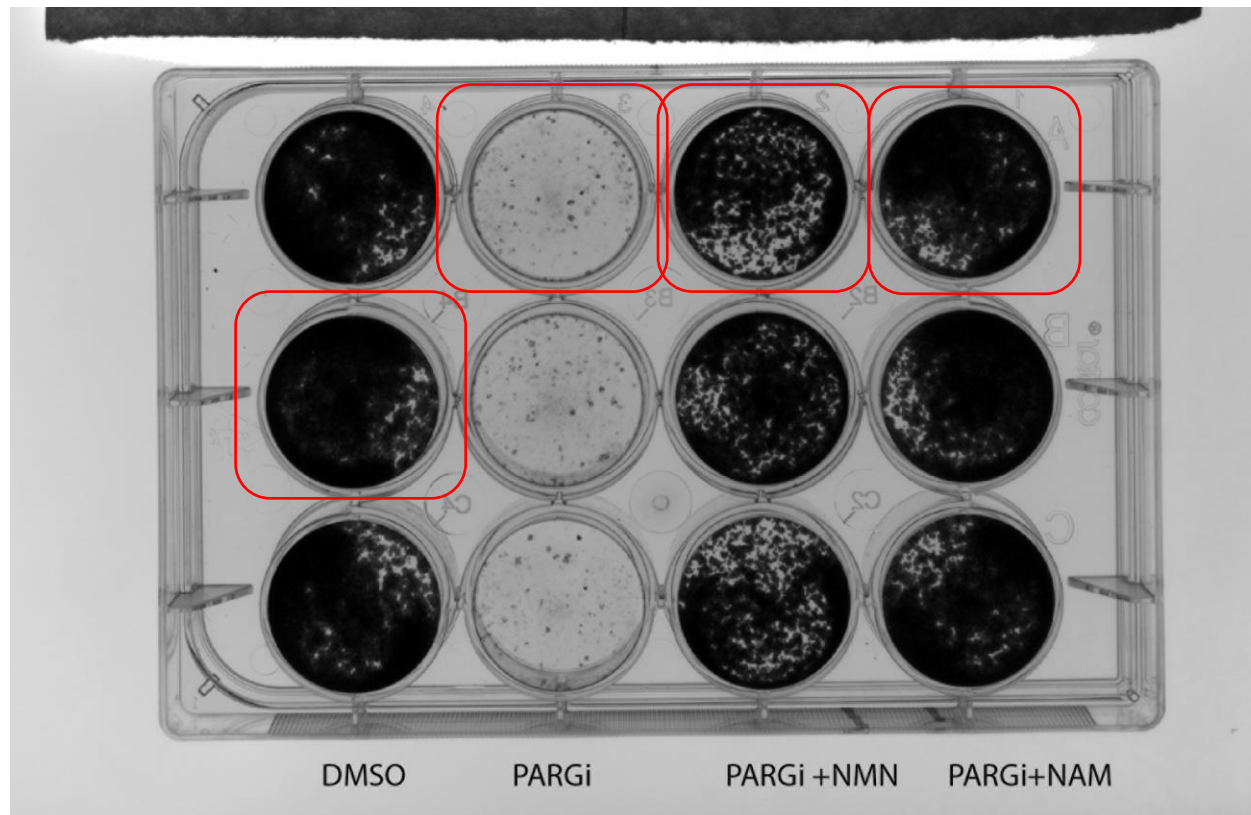

Figure 2

**B**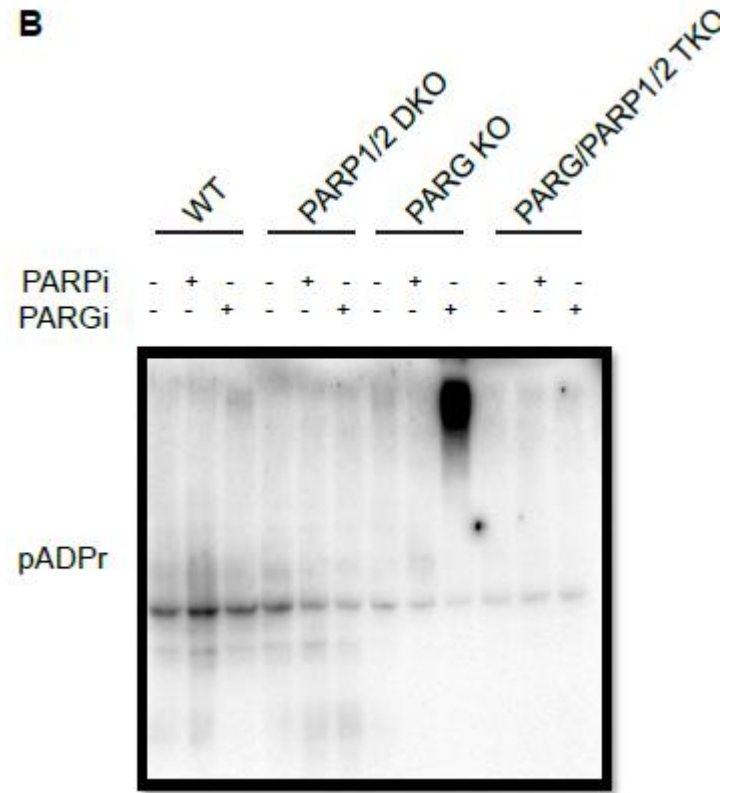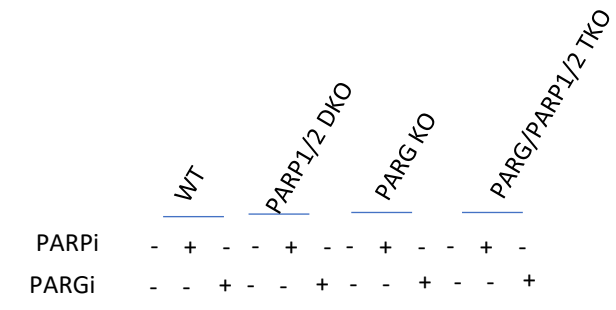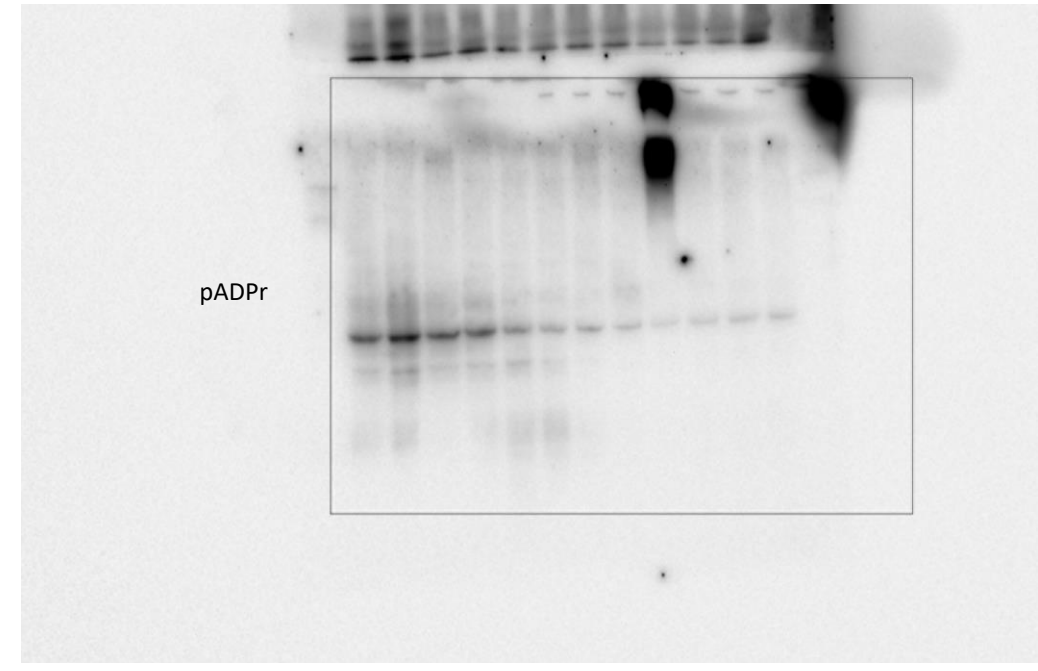

Figure 2-figure supplement 1

Supplement: fig2-data2 [file elife-89303-fig2-data2-v1.zip]

D

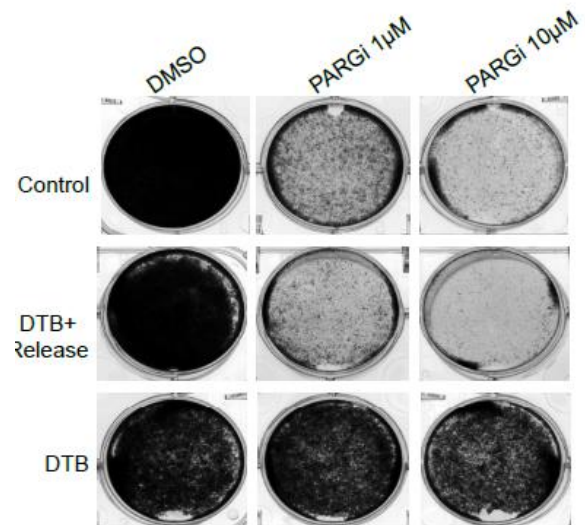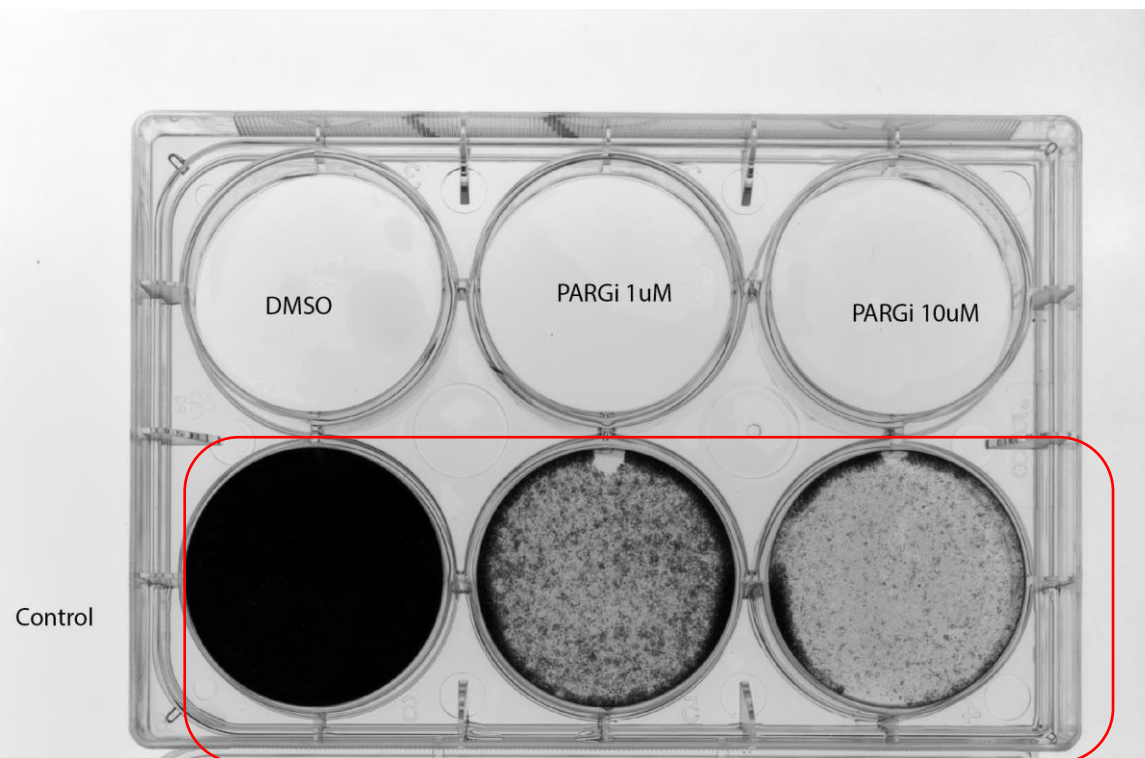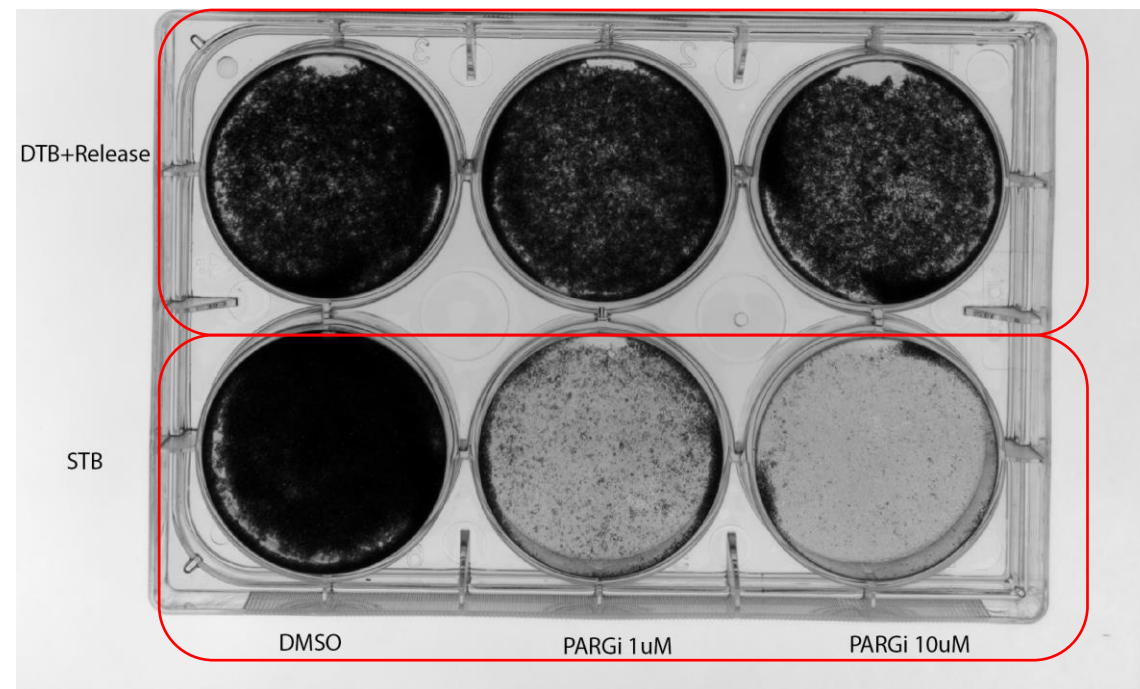

Figure 3

**E**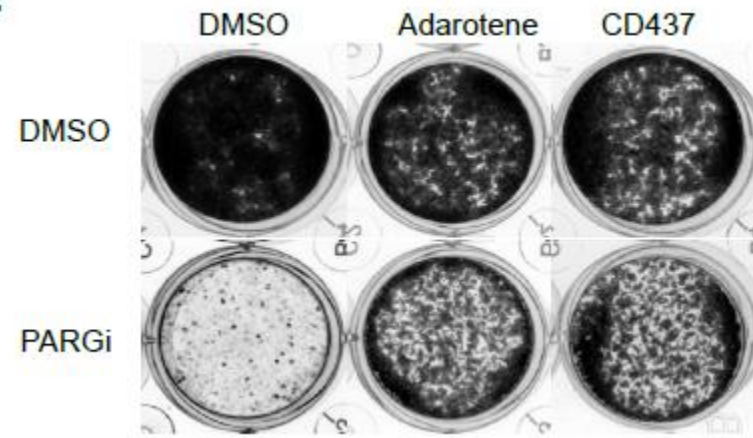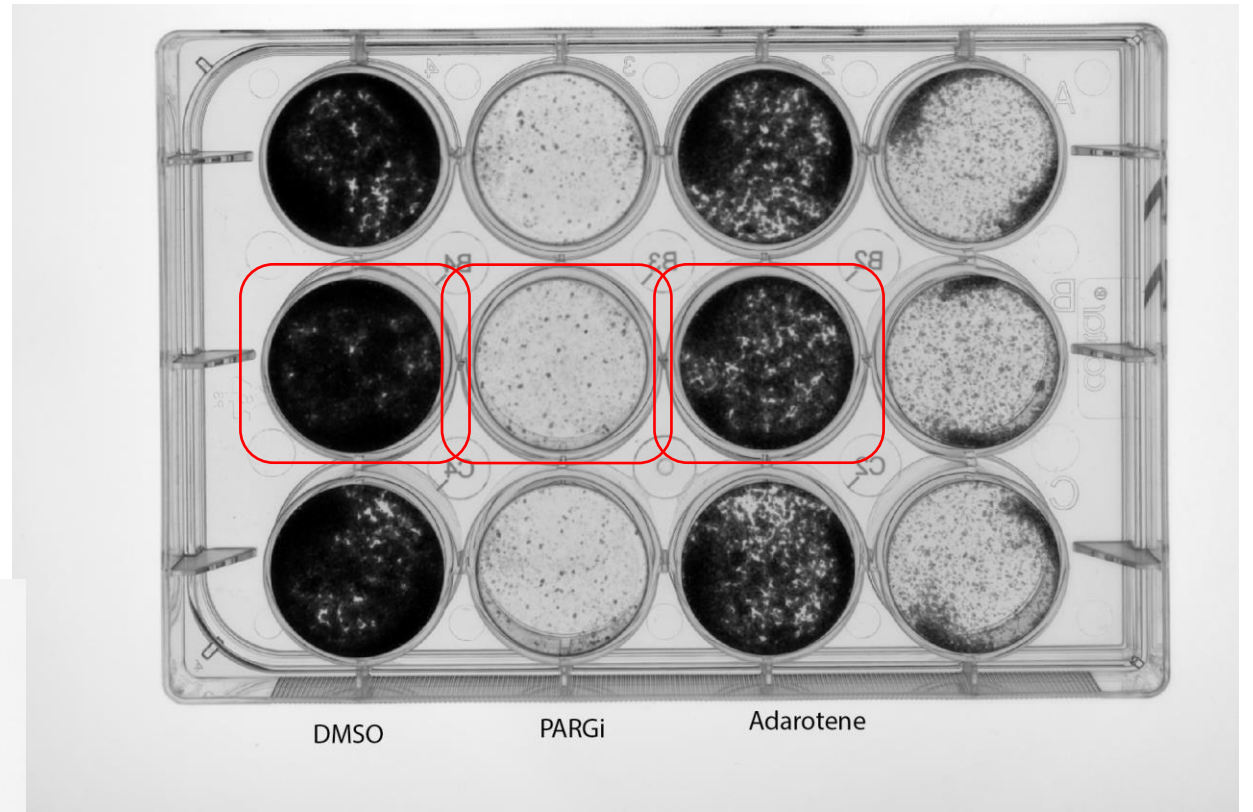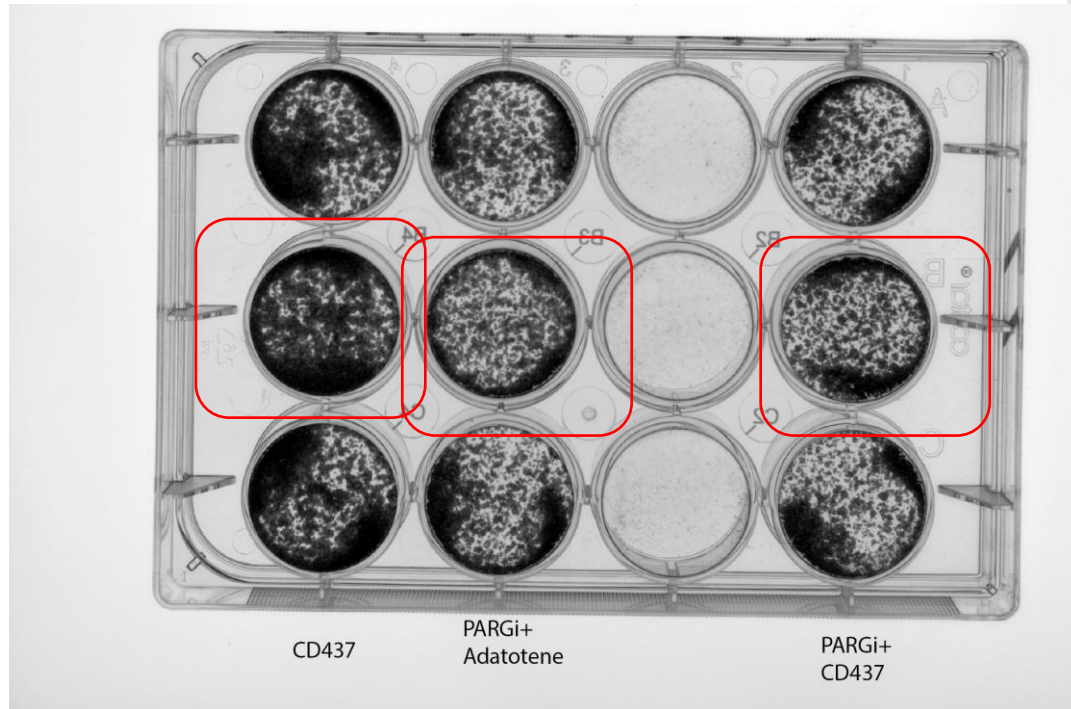

Figure 3

Supplement: fig3-data2 [file elife-89303-fig3-data2-v1.zip]

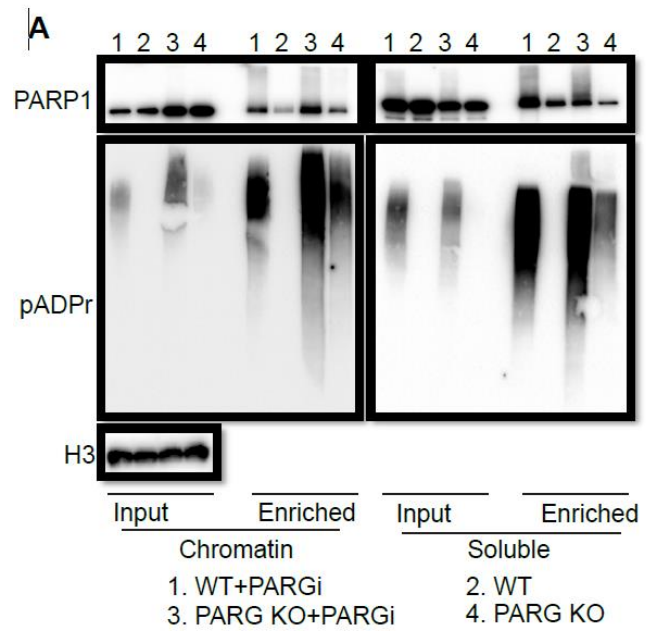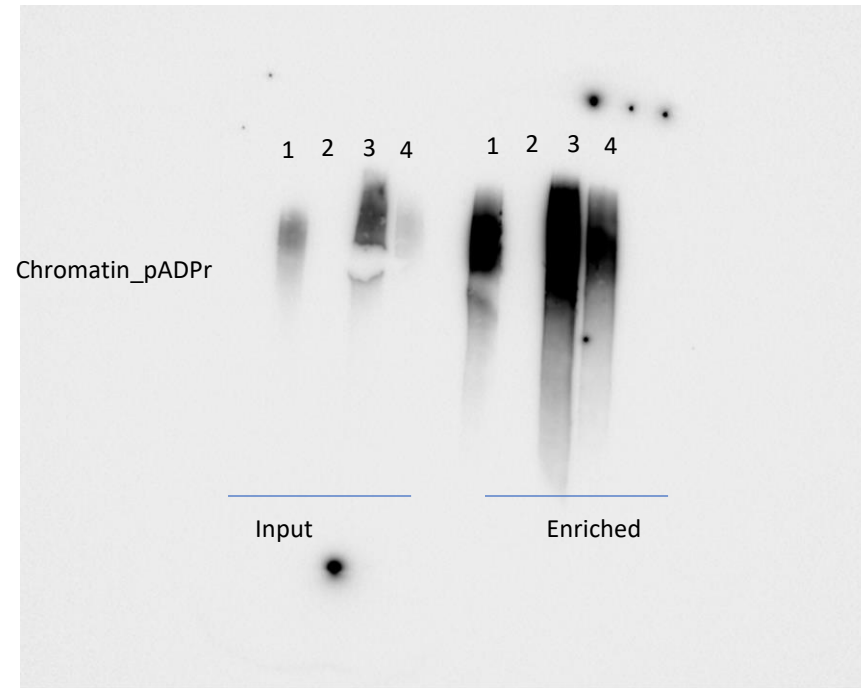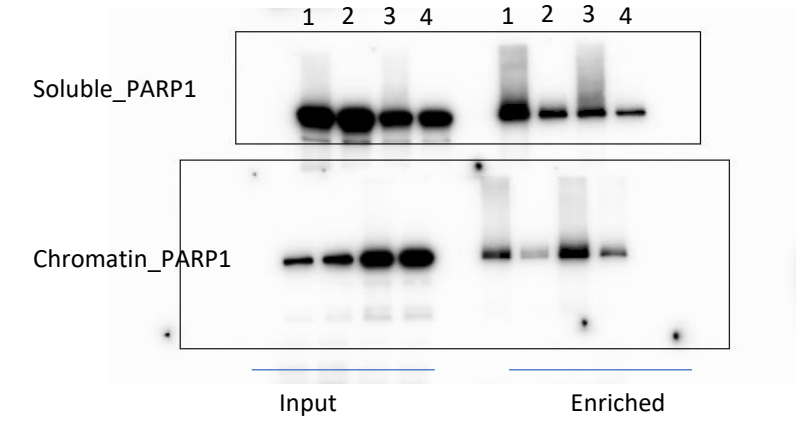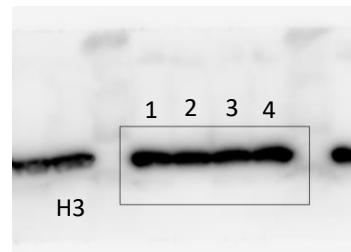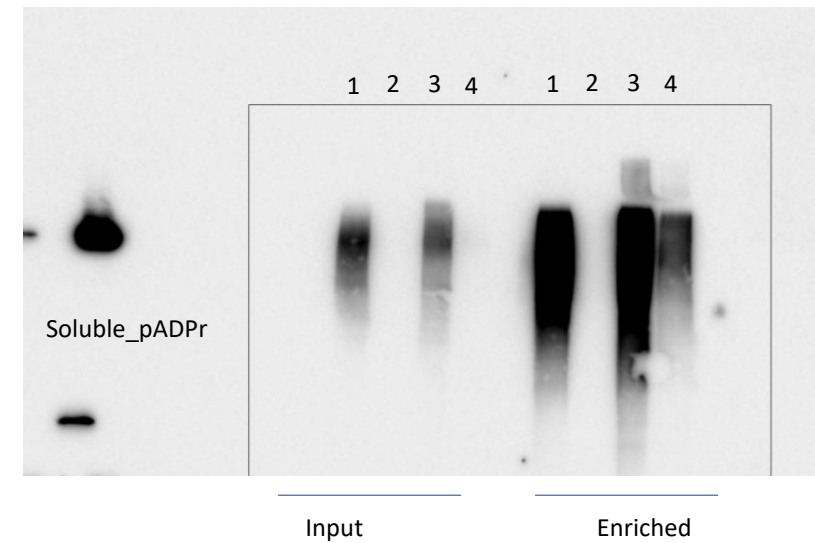

Figure 4

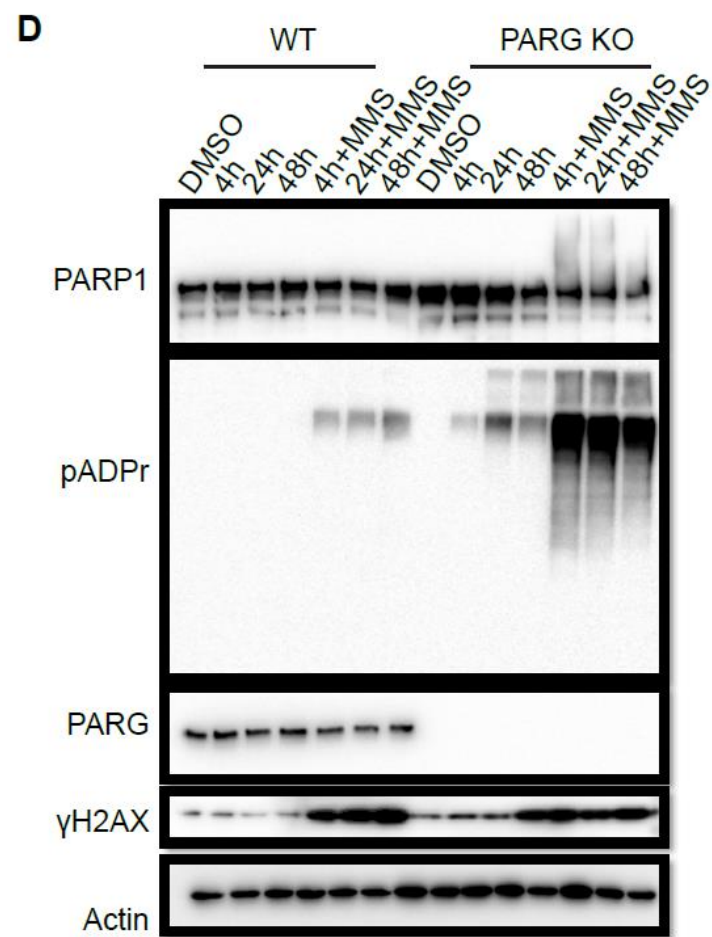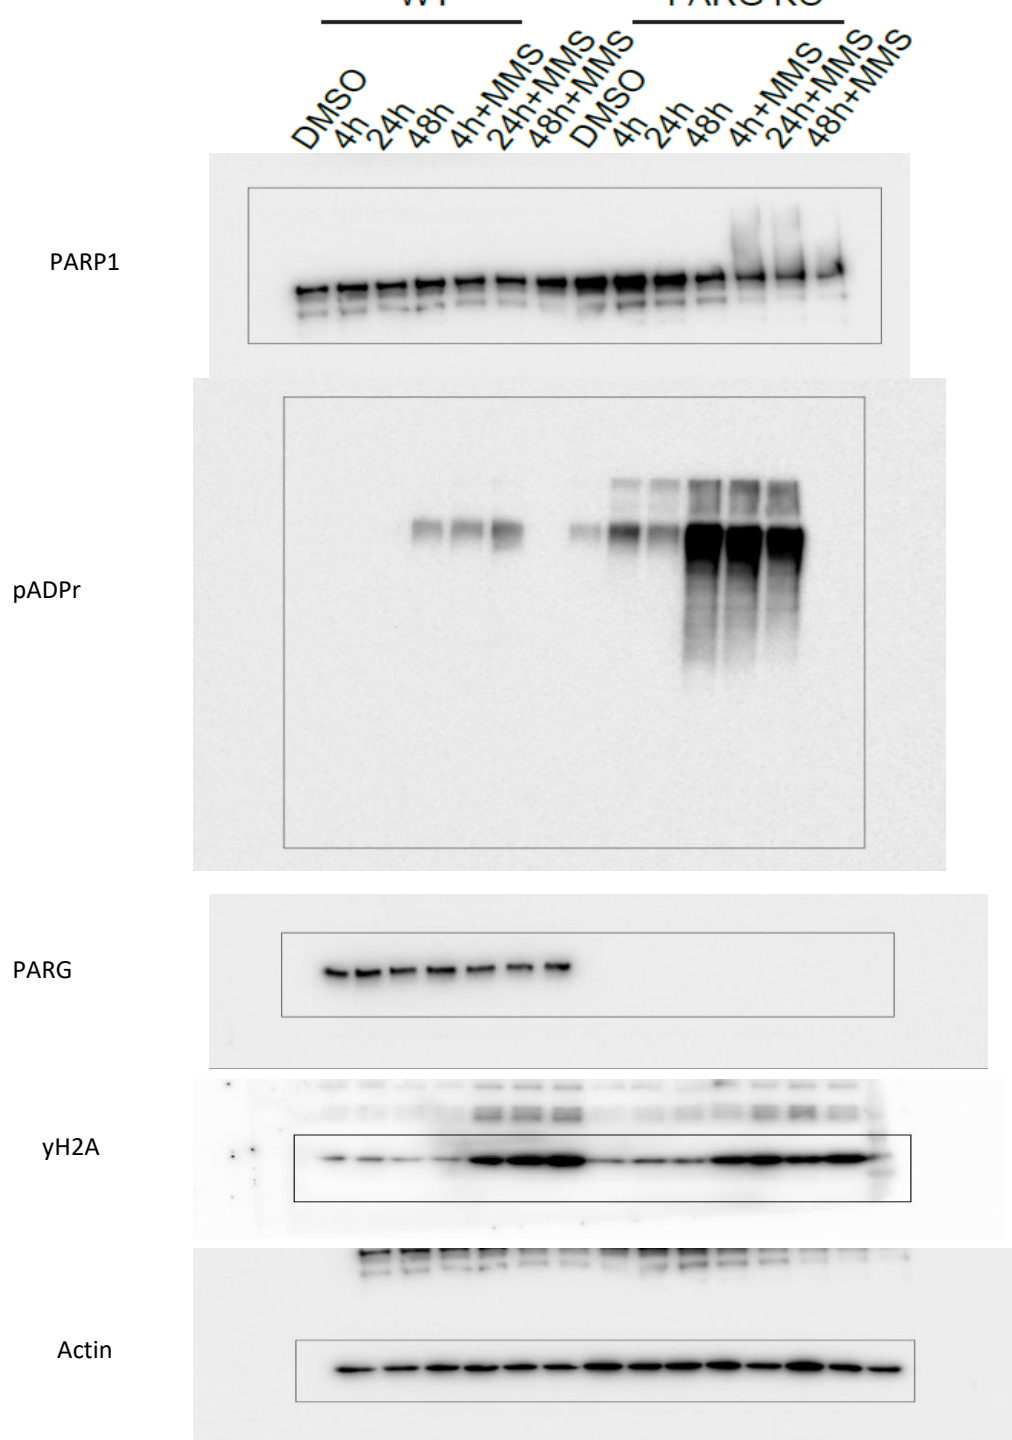

Figure 4

Supplement: fig4-data2 [file elife-89303-fig4-data2-v1.zip]

**B**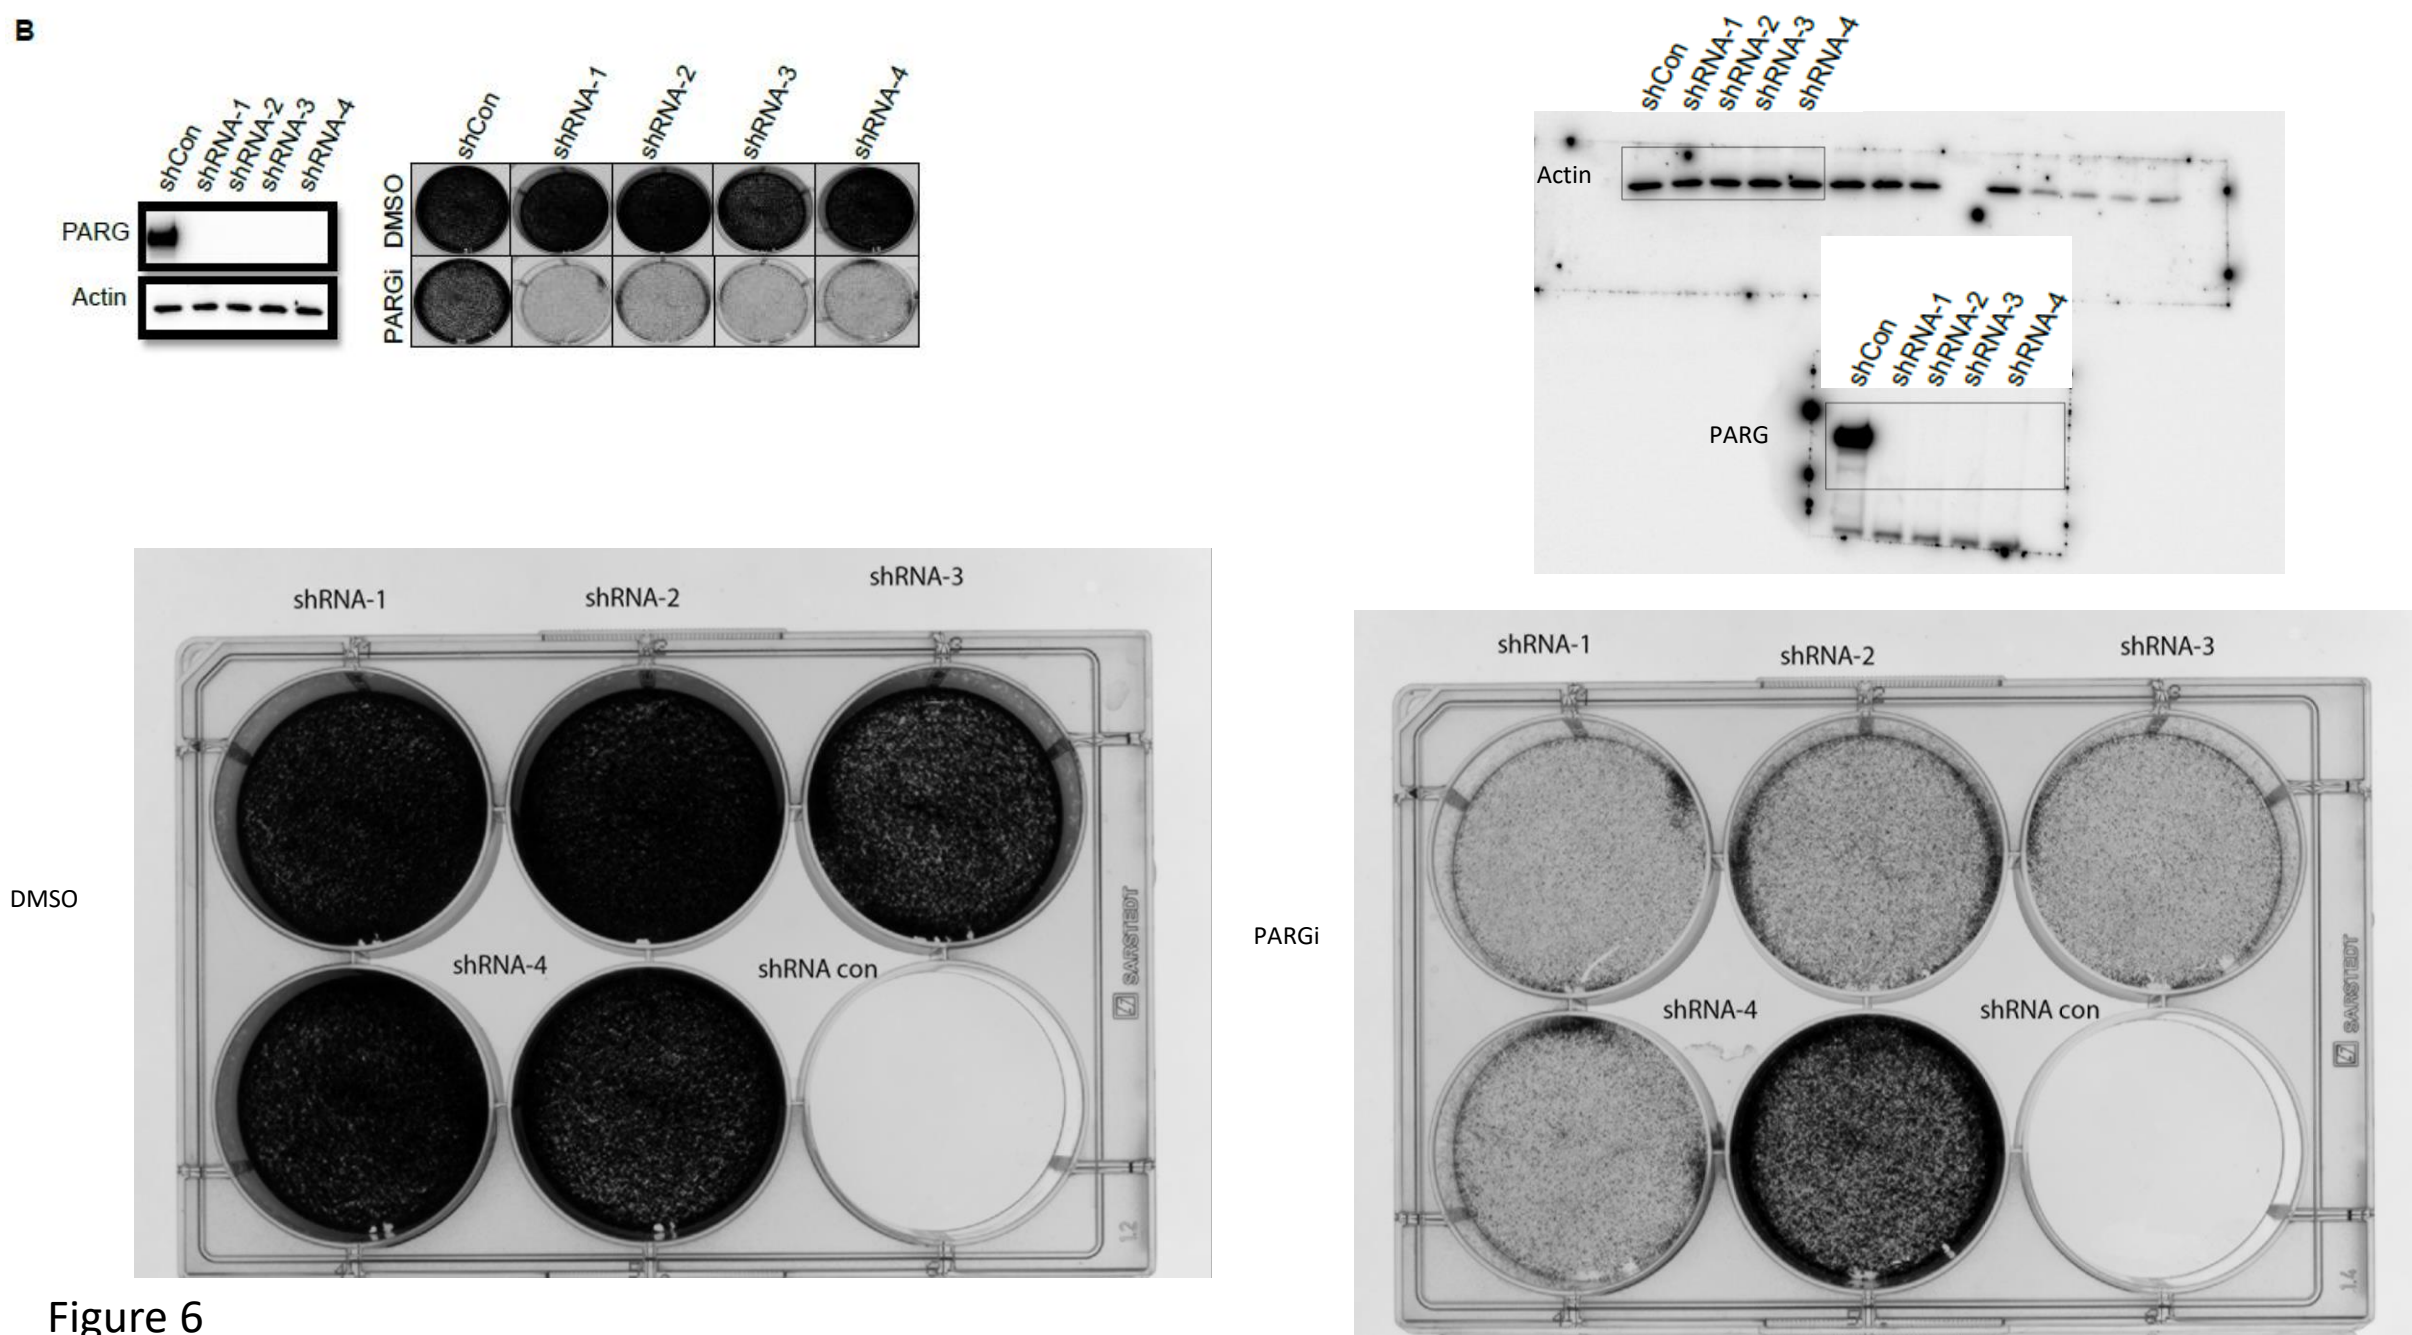

Figure 6

D

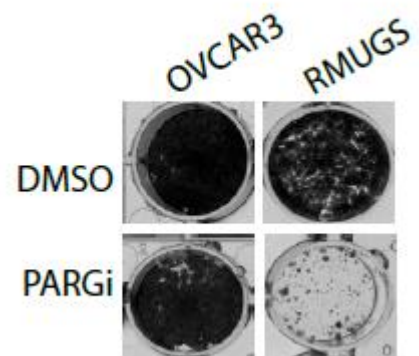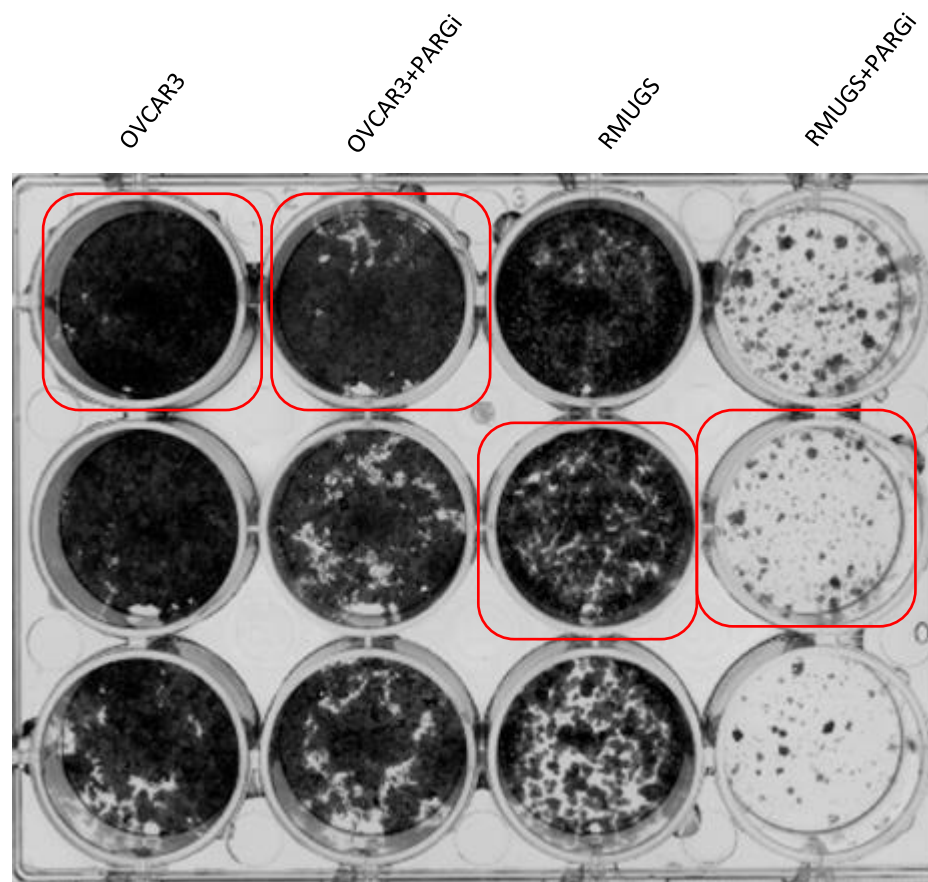

Figure 6

E

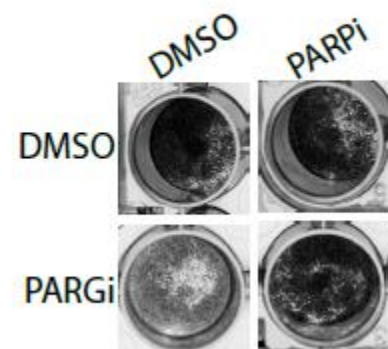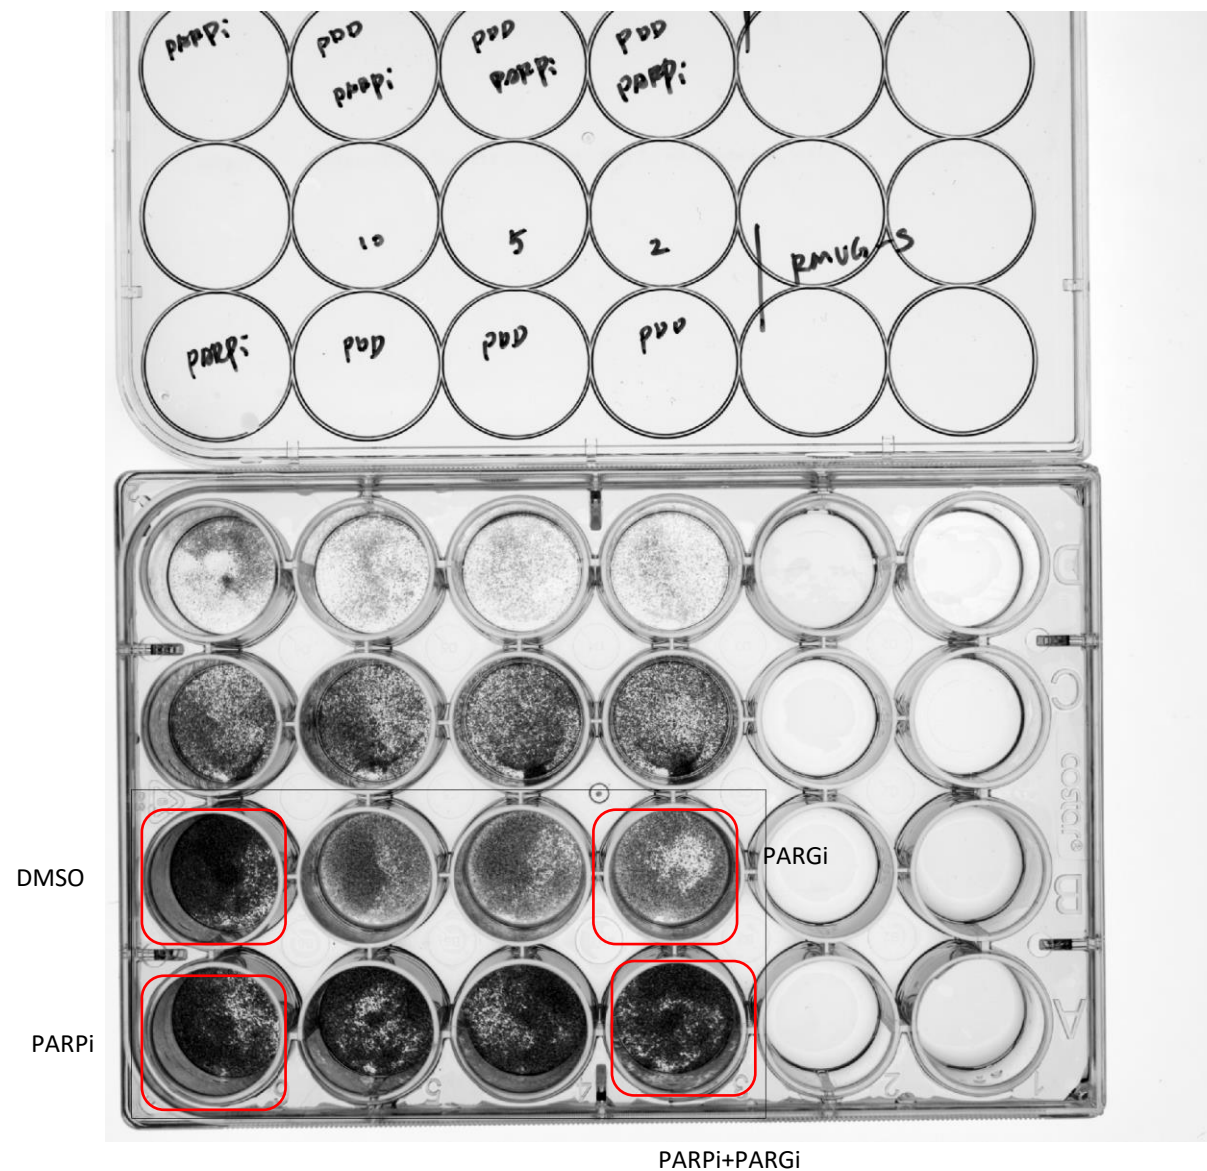

Figure 6

Supplement: fig6-data2 [file elife-89303-fig6-data2-v1.zip]

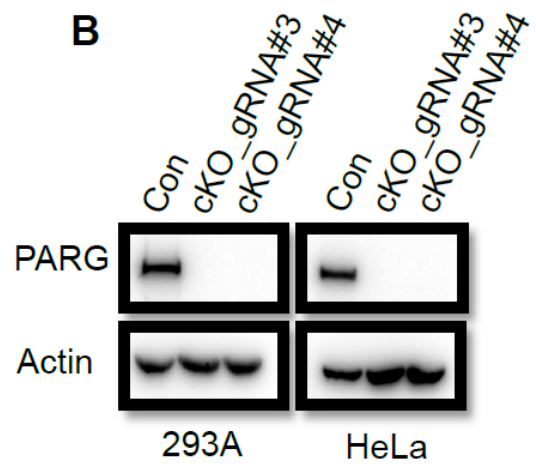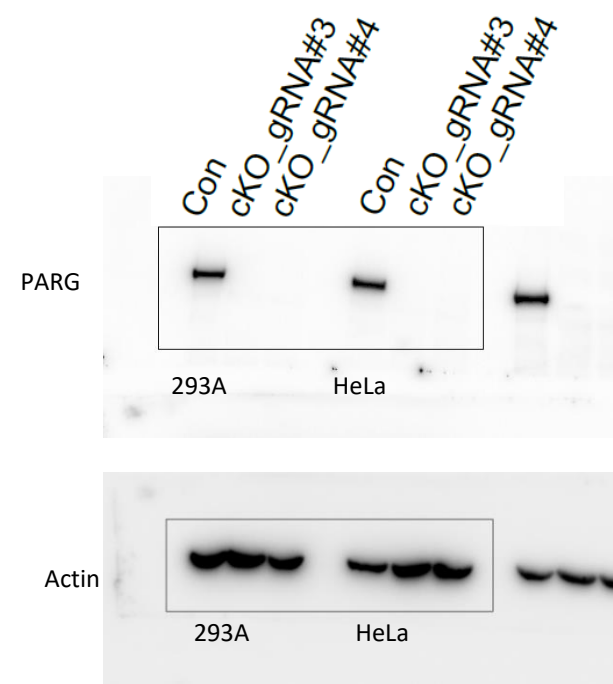

Figure 7

**C**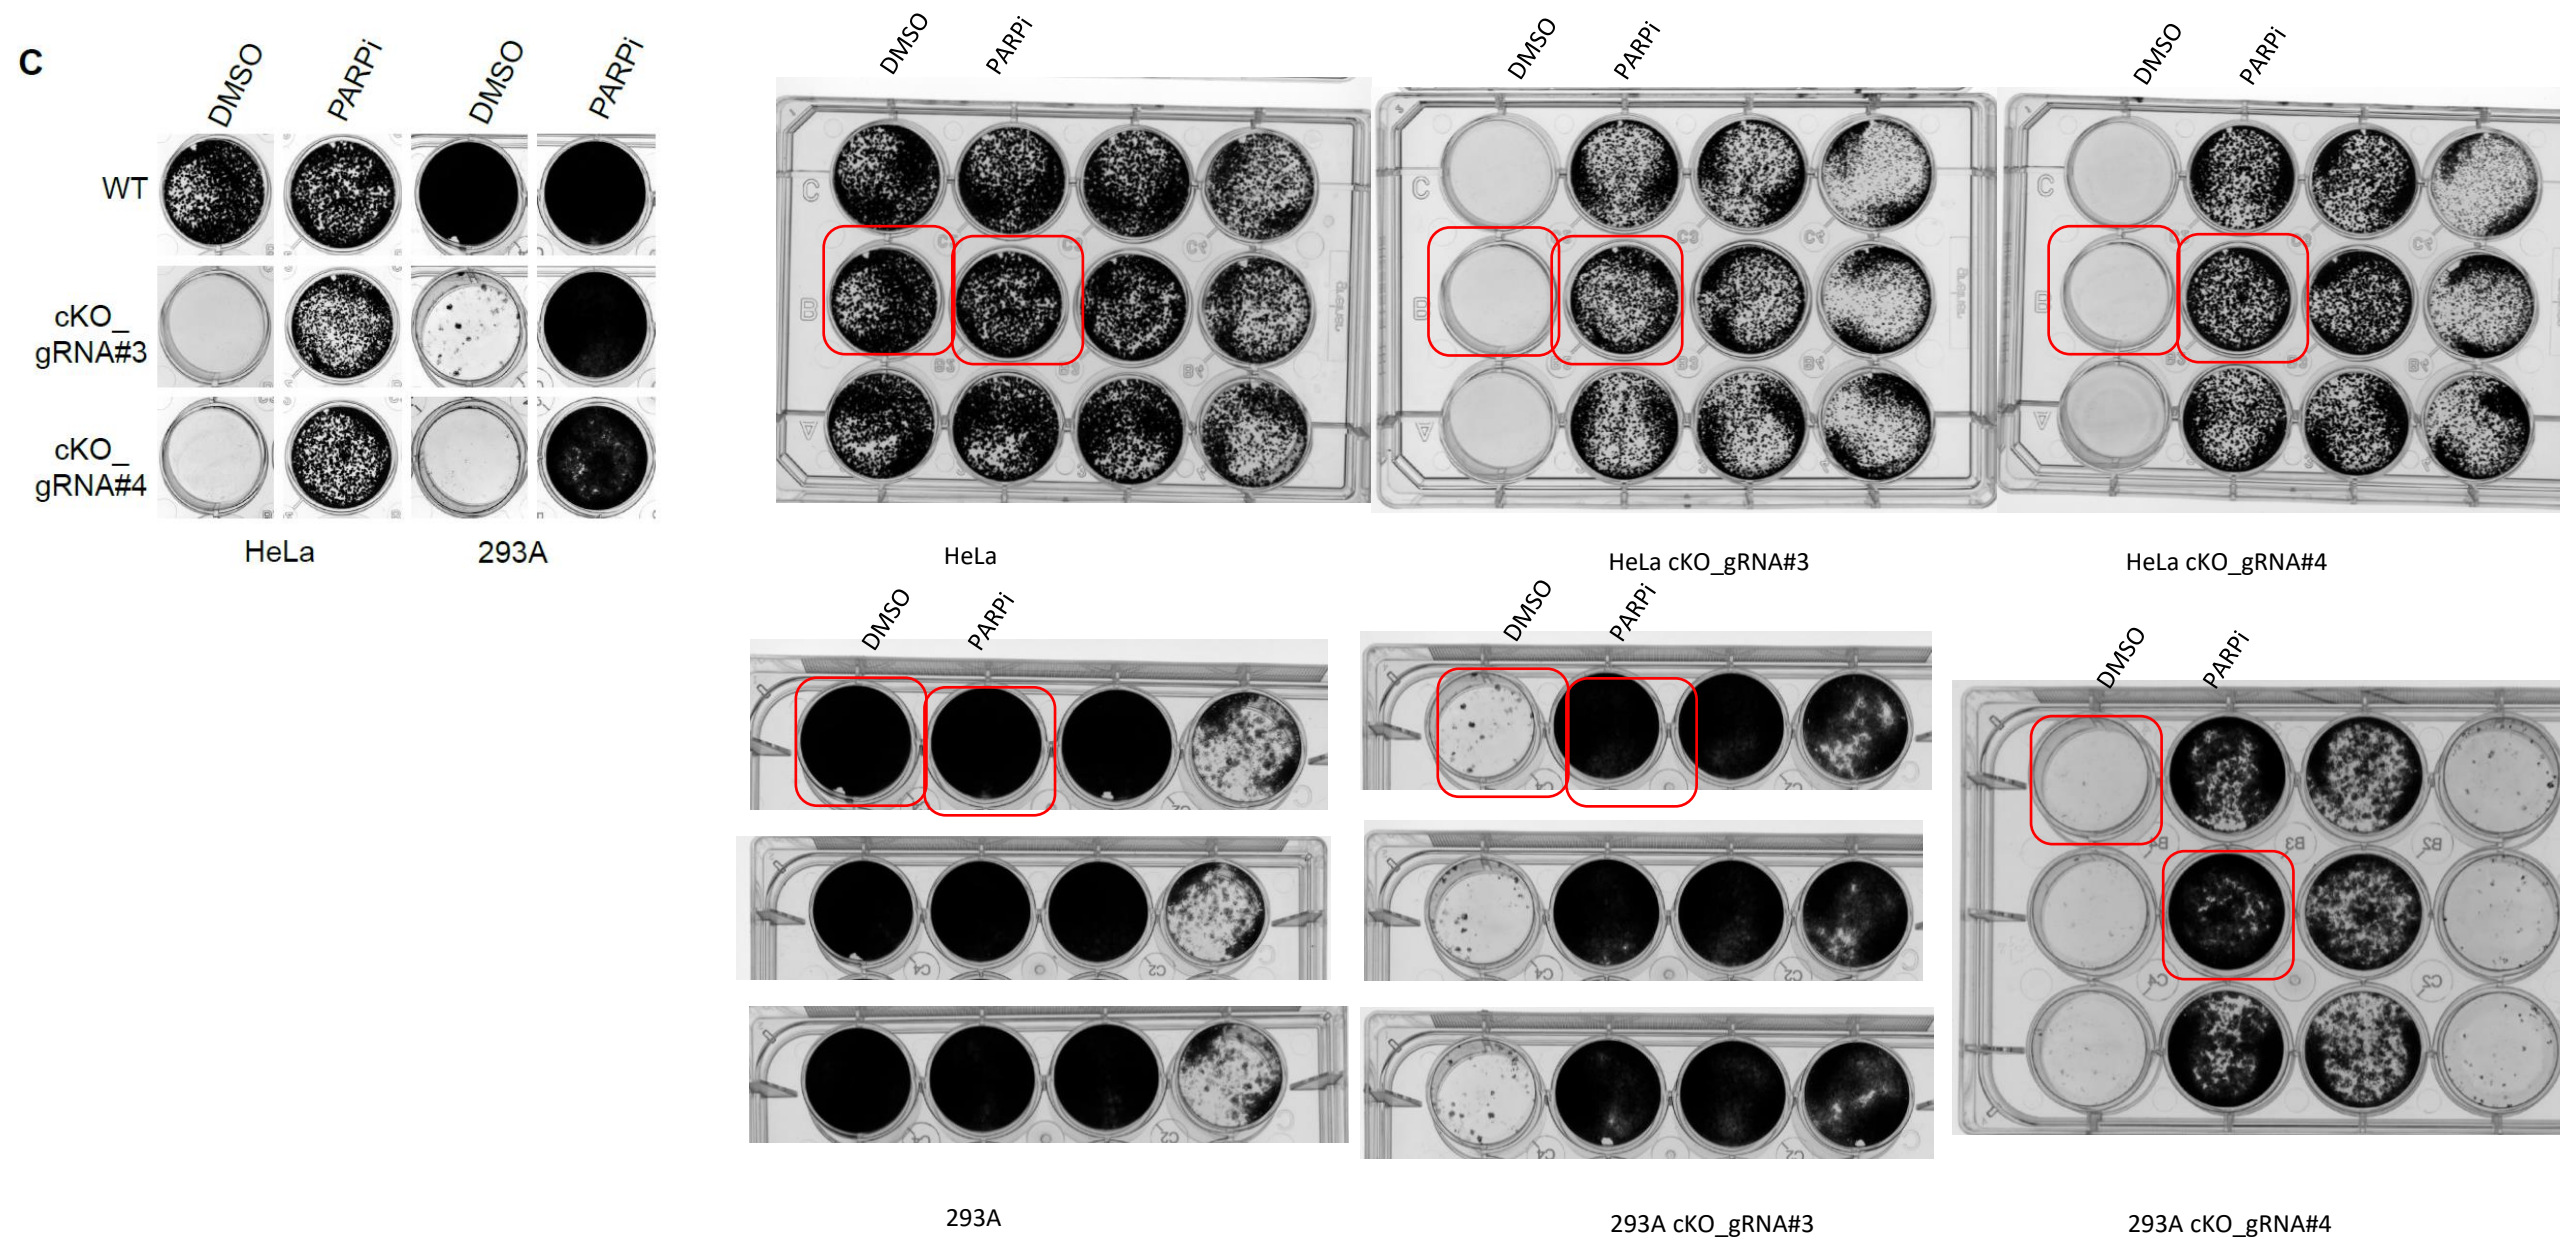

Figure 7

D

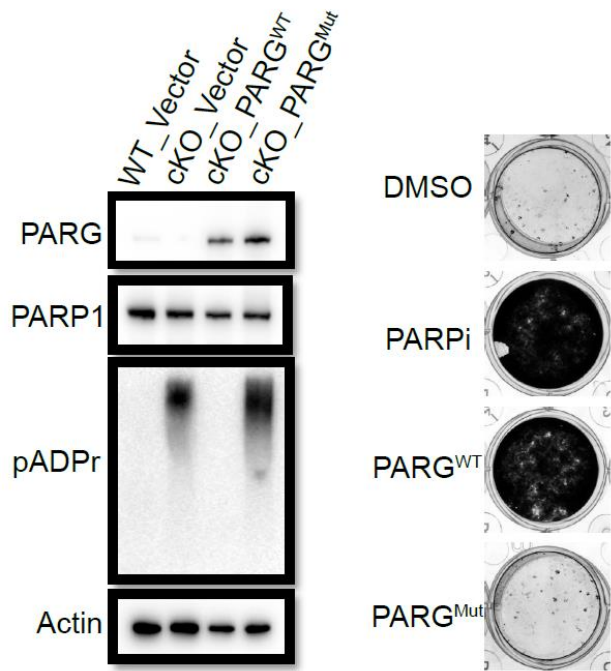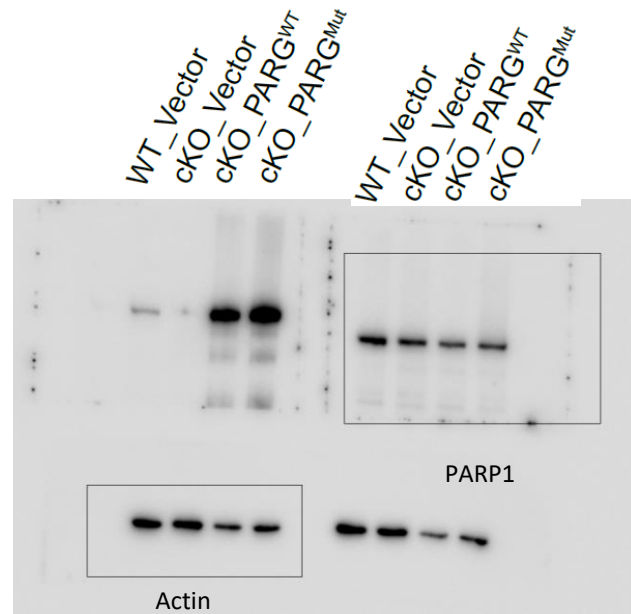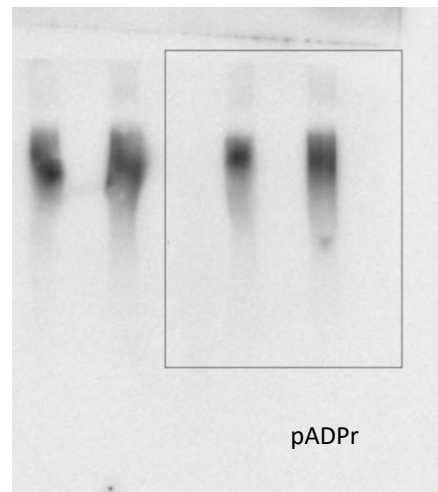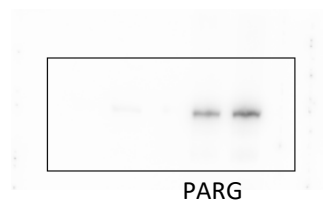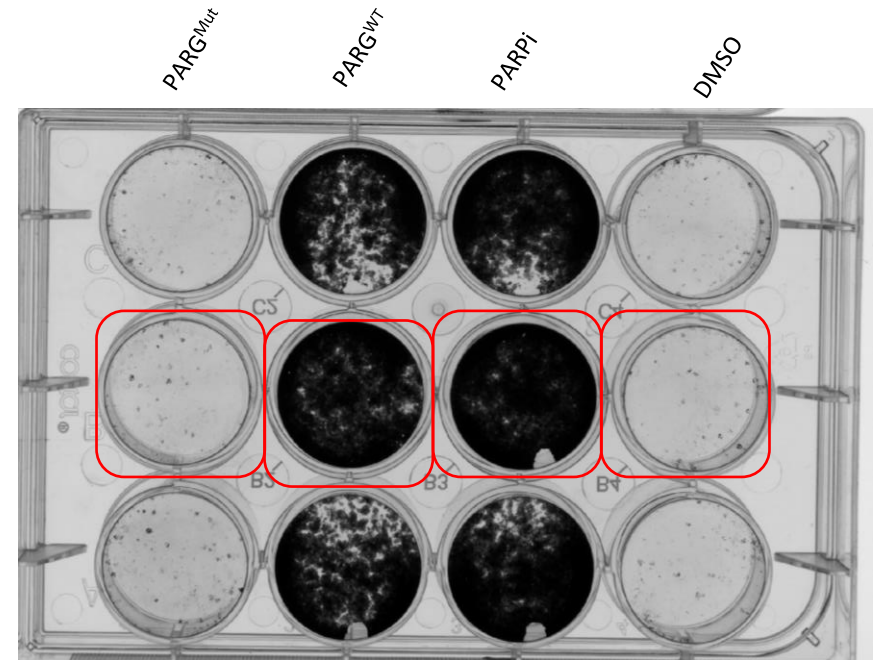

Figure 7

E

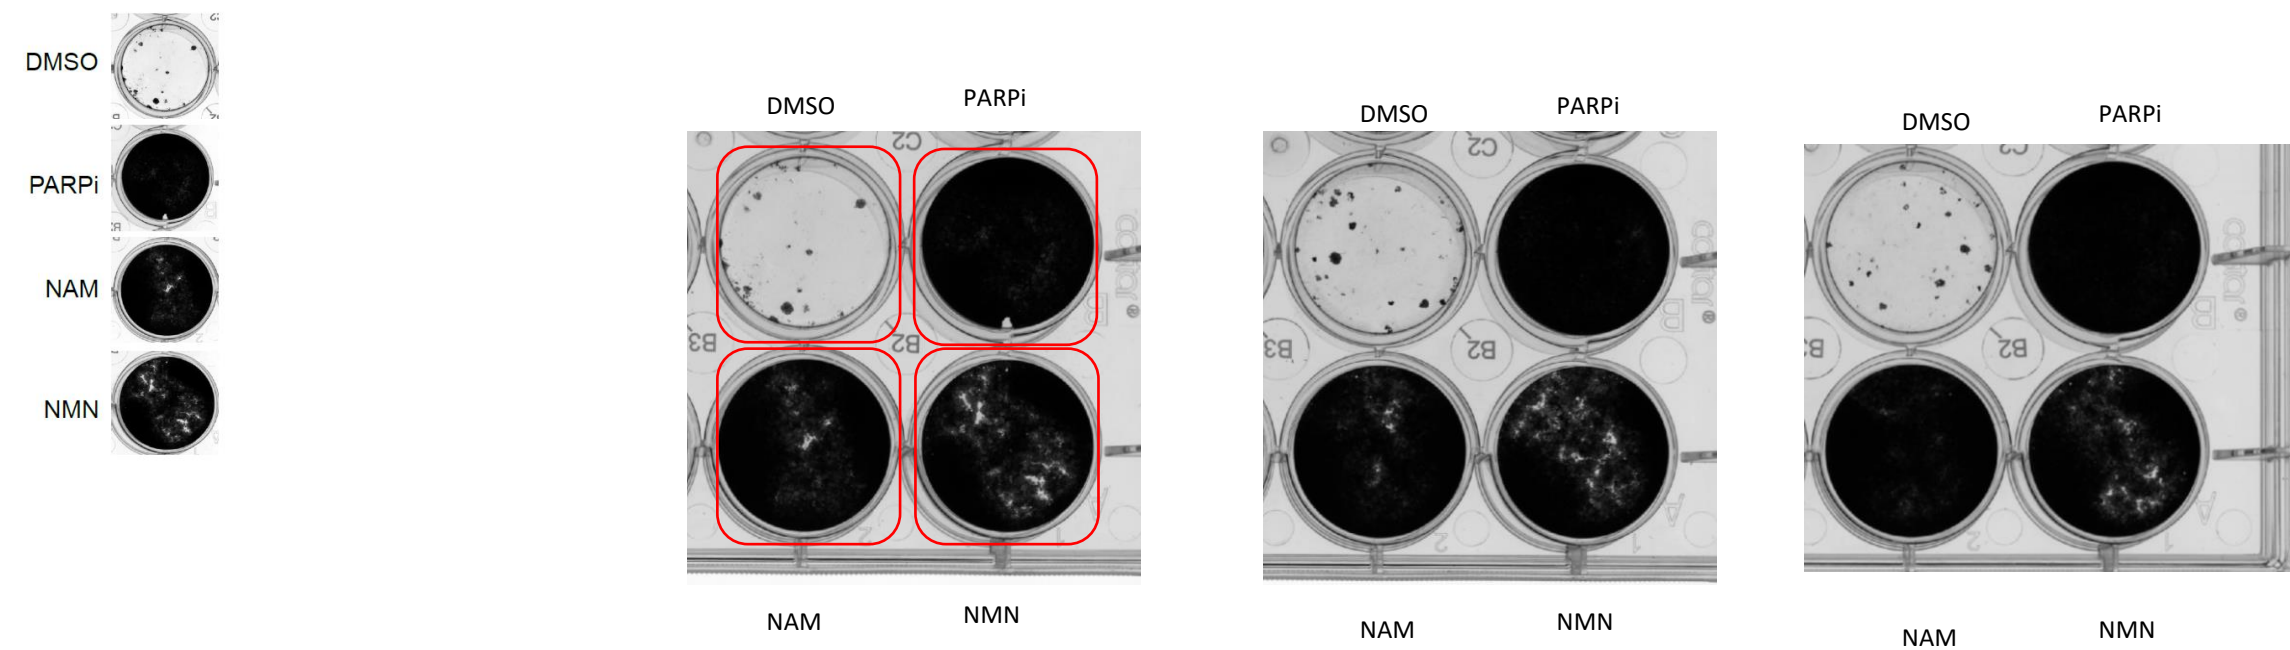

Figure 7



G

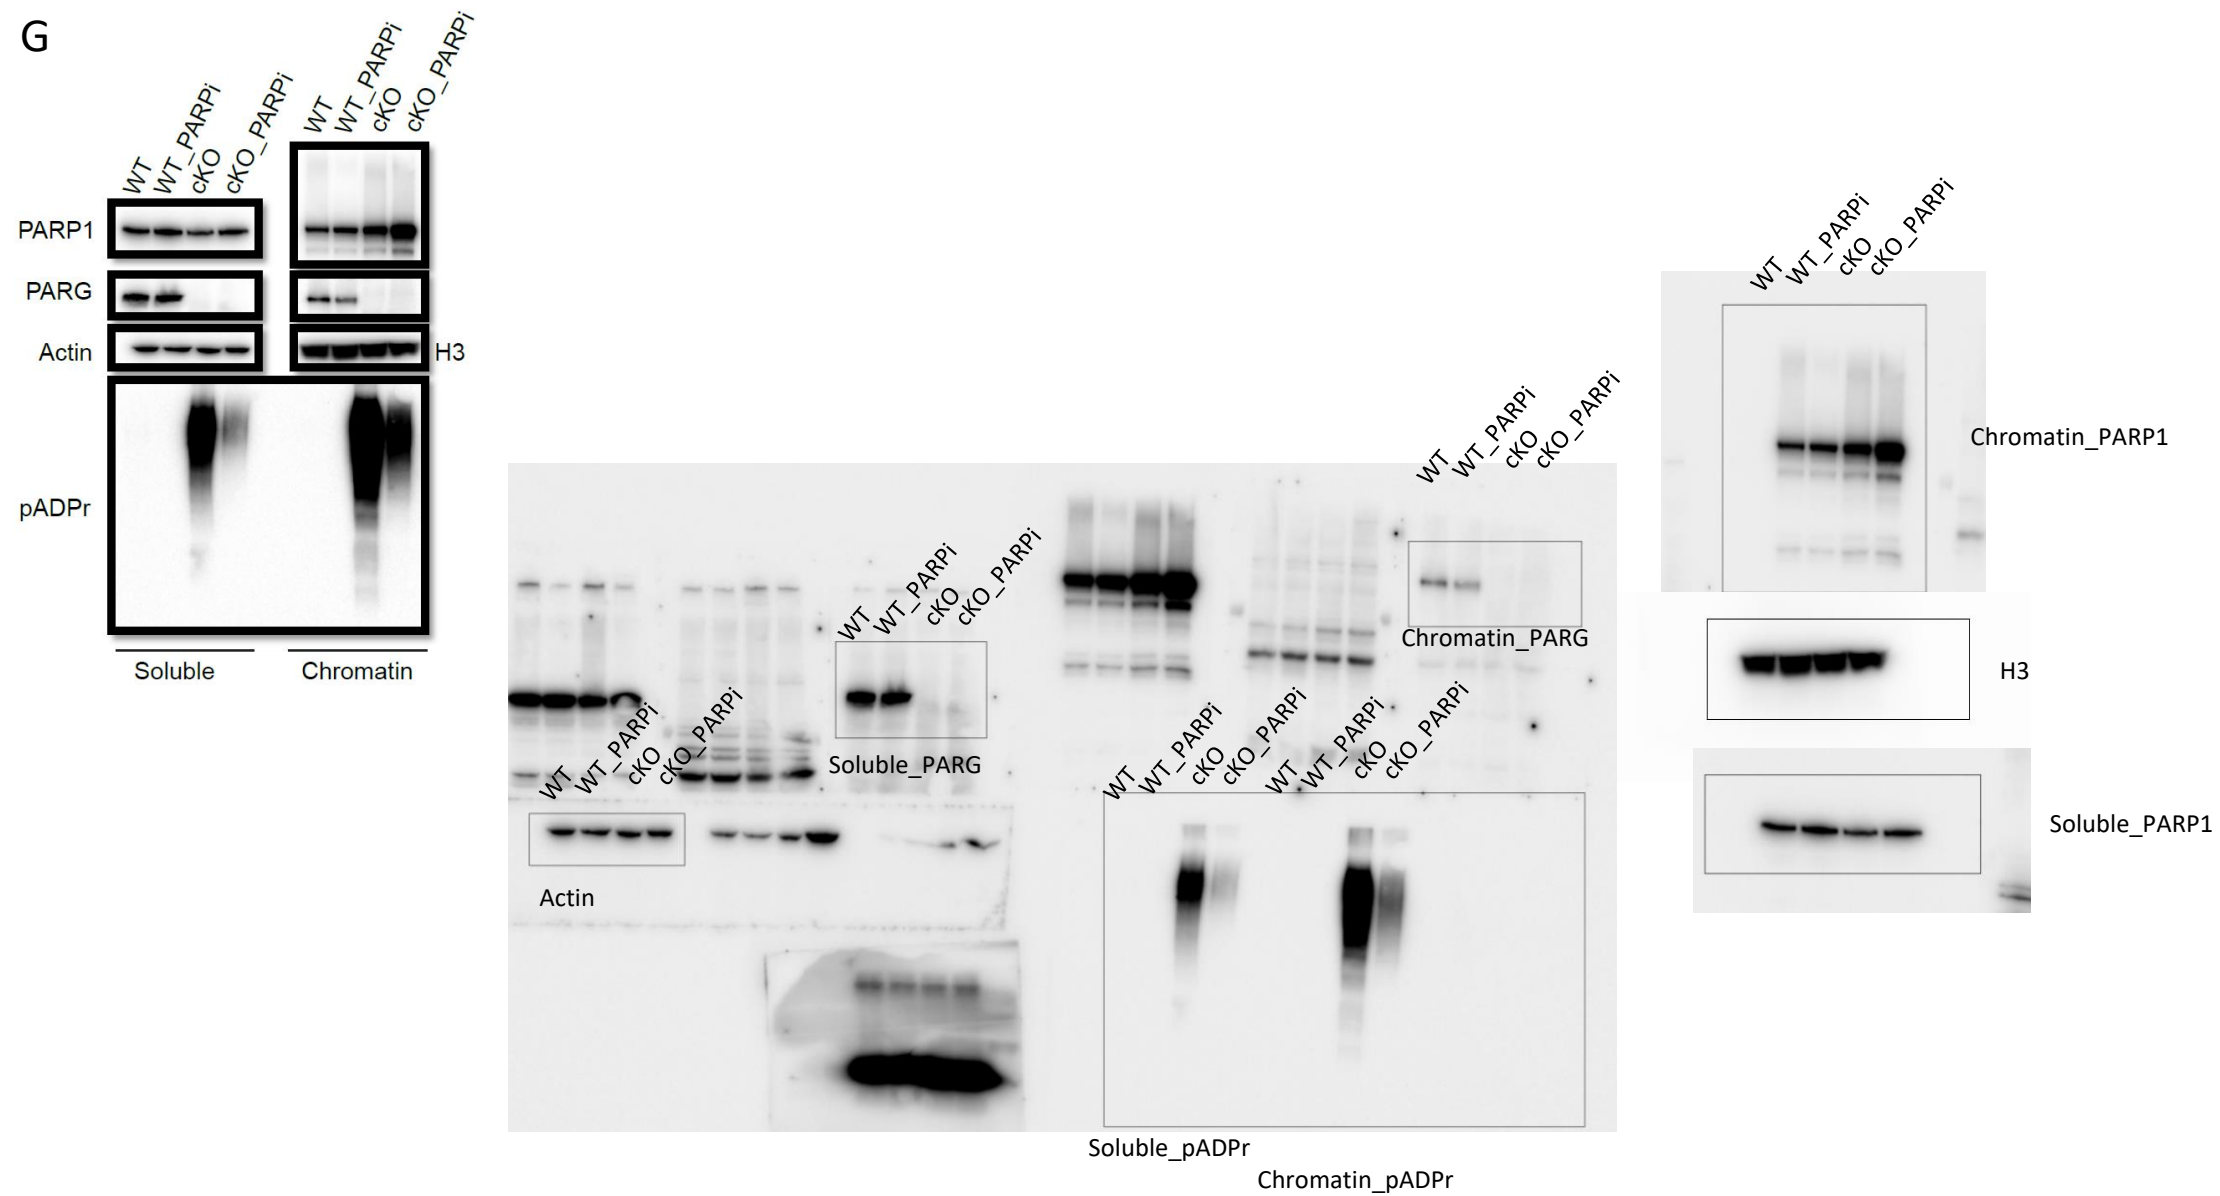

Figure 7

Supplement: fig7-data2 [file elife-89303-fig7-data2-v1.zip]
